# Supplementary material for: Rare coding variants from ADSP R5 whole-genome sequencing implicate novel genes in Alzheimer’s disease
Source: Research Square preprint supplement (doi:10.21203/rs.3.rs-9013646/v1), 2026-03-31
Supplement: Supplementary file 2 [file 6aef51d9e56b9cc6c92afe2a.pdf]

| <b>Supplemental Tables</b> |                                                            |
|----------------------------|------------------------------------------------------------|
| S1                         | Cohorts and samples                                        |
| S2                         | ADSP PHC endophenotypes                                    |
| S3                         | 40 significant genes from rare aggregation association     |
| S4                         | Carrier vs. non-carrier tests for each gene-phenotype pair |
| S5                         | Replications in UKB and ADGC                               |
| S6                         | Ancestry concentration analysis                            |
| S7                         | List of SNVs for coalescence analysis                      |
| S8                         | Sample reported and genetic inferring acenstry             |

| <b>Table S1 Cohorts and samples</b>                                                               |         |
|---------------------------------------------------------------------------------------------------|---------|
| Cohort                                                                                            | Samples |
| A4 Study (A4)                                                                                     | 3345    |
| Adult Changes in Thought (ACT)                                                                    | 278     |
| Alzheimer's Disease Neuroimaging Initiative (ADNI)                                                | 2168    |
| Amish Protective Variant Study (AMISH_PV)                                                         | 1132    |
| Arizona APOE Cohort Study                                                                         | 88      |
| ASPrin in Reducing Events in the Elderly (ASPREE)                                                 | 3067    |
| Brain Amyloid Cognitive Normal Elders Study (BACNE)                                               | 129     |
| Cache County Study                                                                                | 207     |
| Cardiff EOAD                                                                                      | 395     |
| Case Western Reserve University (CWRU) Autopsy Cohort                                             | 136     |
| Case Western Reserve University (CWRU) Rapid Decline Cohort                                       | 236     |
| Center for Cognitive Neuroscience and Aging (CNSA)                                                | 271     |
| Cuban American Alzheimer's Disease Initiative (CuAADI)                                            | 121     |
| Erasmus Rucphen Family (ERF)                                                                      | 122     |
| Estudio Familiar de la Influencia Genetica en Alzheimer (EFIGA)                                   | 5300    |
| Gwangju Alzheimer's and Related Dementia (GARD)                                                   | 1995    |
| Harmonized Diagnostic Assessment of Dementia for the Longitudinal Aging Study of India (LASI-DAD) | 2682    |
| Health and Aging Brain Study - Health Disparities (HABS-HD)                                       | 1359    |
| Healthy Elderly Active Longevity (HEAL) Cohort "Welllderly"                                       | 1147    |
| Heart SCORE (HS)                                                                                  | 133     |
| Hillblom' Aging Network (HAN)                                                                     | 15      |
| Human Connectome Project (HCP)                                                                    | 189     |
| Indianapolis-Ibadan Dementia Project (IBADAN)                                                     | 964     |
| IndyAA - Indianapolis African Americans                                                           | 395     |
| KnightADRC - Charles F. and Joanne Knight Alzheimer's Disease Research Center (KGAD)              | 1833    |
| Korean Brain Aging Study for the Early Diagnosis and Prediction of AD (KBASE)                     | 603     |
| LonGenity                                                                                         | 27      |
| Longevity Genes Project (LGP)                                                                     | 5       |
| Mayo Clinic                                                                                       | 169     |
| Memory and Aging Project (MAP)                                                                    | 360     |
| Mexican Health and Aging Study (MHAS)                                                             | 2617    |
| Mexico-Southern California Autosomal Dominant Alzheimer's Disease Consortium                      | 62      |
| Mount Sinai Brain Bank                                                                            | 344     |
| National Cell Repository for Alzheimer's Disease (NCRAD)                                          | 521     |
| National Institute of Aging Alzheimer's Disease Family Based Study (NIA AD-FBS)                   | 1292    |
| NIA Alzheimer Disease Centers (ADC)                                                               | 12574   |
| Northern Manhattan Study (NOMAS)                                                                  | 807     |
| Peru Alzheimer's Disease Initiative (PeADI)                                                       | 493     |
| Progressive Supranuclear Palsy Study (PSP)                                                        | 1584    |
| Progressive Supranuclear Palsy Study - UCLA (PSP-UCLA)                                            | 408     |
| Puerto Rican 10/66 Study (PR1066)                                                                 | 1517    |
| Puerto Rican Alzheimer's Disease Initiative (PRADI)                                               | 738     |
| Religious Orders Study (ROS)                                                                      | 370     |
| Research in African-American Alzheimer's Disease Initiative (REAAADI)                             | 715     |
| Resource for Early-onset Alzheimer's Disease Research (READR)                                     | 39      |

|                                                                                     |      |
|-------------------------------------------------------------------------------------|------|
| Stanford Extreme Phenotypes in AD (StEP-AD)                                         | 195  |
| Texas Alzheimer's Research and Care Consortium (TARCC)                              | 1017 |
| The Ginkgo Evaluation of Memory Study (GEMS)                                        | 161  |
| The Monongahela-Youghiogheny Healthy Aging Team study (MYHAT)                       | 61   |
| The University of Alabama Birmingham Alzheimer's Disease Research Center (UAB_ADRC) | 17   |
| University of Miami                                                                 | 1246 |
| University of Miami Brain Bank (MBB)                                                | 312  |
| University of Pittsburgh ADRC- Kamboh                                               | 541  |
| University of Washington Families                                                   | 89   |
| Vanderbilt University                                                               | 75   |
| Washington Heights-Inwood Columbia Aging Project (WHICAP)                           | 821  |
| Wisconsin Registry for Alzheimer's Prevention (WRAP)                                | 1020 |

| <b>Table S2 ADSP PHC endophenotypes</b> |                                               |                  |           |                |
|-----------------------------------------|-----------------------------------------------|------------------|-----------|----------------|
|                                         | <b>Description</b>                            | <b>Value</b>     | <b>AD</b> | <b>Control</b> |
| Age                                     | Age                                           | [15 - 90+]       | 11804     | 25869          |
| Braak                                   | BRAAK Stage                                   | [0 - 6]          | 2738      | 939            |
| CERAD                                   | CERAD Score                                   | [0 - 3]          | 1747      | 725            |
| MEM                                     | Harmonized Composite Memory Score             | [-3.372 - 2.866] | 5851      | 10770          |
| EXF                                     | Harmonized Composite Executive Function Score | [-3.612 - 3.225] | 5404      | 7497           |
| LAN                                     | Harmonized Composite Language Score           | [-3.936 - 3.165] | 5335      | 7495           |
| VSP                                     | Harmonized Composite Visuospatial Score       | [-3.279 - 2.518] | 1414      | 1400           |
| AB42                                    | Harmonized Z-Score for AB42 Biomarker Levels  | [-2.820 - 2.626] | 791       | 786            |
| Tau                                     | Harmonized Z-score for Tau Biomarker Levels   | [-2.787 - 2.581] | 769       | 781            |
| pTau-181                                | Harmonized Z-score for pTau Biomarker Levels  | [-2.977 - 2.919] | 770       | 780            |
| LEWY_full                               | PD Braak Staging                              | [0 - 4]          | 1693      | 715            |
| TDP43                                   | TDP Whole Brain                               | 0 or 1           | 964       | 501            |
| HS_S                                    | Hippocampal sclerosis (dichotomous)           | 0 or 1           | 1654      | 698            |
| CVD_S                                   | Cerebrovascular Disease (dichotomous)         | 0 or 1           | 1701      | 723            |
| CVD_ATH                                 | Atherosclerosis                               | [0 - 3]          | 1680      | 715            |
| CVD_ART                                 | Arteriolosclerosis                            | [0 - 3]          | 1598      | 651            |

| Table S3 40 significant genes from rare aggregation association |         |                 |      |       |           |          |          |         |         |          |                         |
|-----------------------------------------------------------------|---------|-----------------|------|-------|-----------|----------|----------|---------|---------|----------|-------------------------|
| CHROM                                                           | Gene    | Gene stable ID  | Mask | N     | TEST      | BETA     | SE       | CHISQ   | LOG10P  | P        | Nearby GWAS Signals     |
| 1                                                               | NUP210L | ENSG00000143552 | M3   | 38386 | ADD-ACATO |          |          | 36.4298 | 8.80062 | 1.58E-09 |                         |
| 1                                                               |         |                 |      | 38386 | ADD-ACATV |          |          | 30.0524 | 7.3762  | 4.21E-08 |                         |
| 1                                                               |         |                 |      | 38386 | ADD-SKAT  |          |          | 37.1428 | 8.95945 | 1.10E-09 |                         |
| 1                                                               |         |                 |      | 38386 | ADD-SKATO |          |          | 37.498  | 9.03855 | 9.15E-10 |                         |
| 1                                                               |         |                 |      | 38386 | ADD       | -0.3648  | 0.075117 | 24.6533 | 6.16352 | 6.86E-07 |                         |
| 1                                                               | CACNA1S | ENSG00000081248 | M2   | 38386 | ADD-ACATO |          |          | 24.4912 | 6.12698 | 7.46E-07 |                         |
| 1                                                               |         |                 |      | 38386 | ADD-ACATV |          |          | 28.736  | 7.0812  | 8.29E-08 |                         |
| 1                                                               | GPR37L1 | ENSG00000170075 | M1   | 38386 | ADD-ACATO |          |          | 24.0627 | 6.03036 | 9.32E-07 |                         |
| 1                                                               |         |                 |      | 38386 | ADD-ACATV |          |          | 23.7987 | 5.97081 | 1.07E-06 |                         |
| 1                                                               |         |                 |      | 38386 | ADD-SKAT  |          |          | 23.685  | 5.94513 | 1.13E-06 |                         |
| 1                                                               |         |                 |      | 38386 | ADD-SKATO |          |          | 24.7974 | 6.19597 | 6.37E-07 |                         |
| 1                                                               |         |                 |      | 38385 | ADD       | 0.464595 | 0.091321 | 24.9188 | 6.22333 | 5.98E-07 |                         |
| 1                                                               | EXO1    | ENSG00000174371 | M2   | 38386 | ADD-ACATO |          |          | 28.3879 | 7.00312 | 9.93E-08 |                         |
| 1                                                               |         |                 |      | 38386 | ADD-ACATV |          |          | 32.6504 | 7.95737 | 1.10E-08 |                         |
| 2                                                               | PDE11A  | ENSG00000128655 | M2   | 38386 | ADD-ACATO |          |          | 24.5745 | 6.14574 | 7.15E-07 |                         |
| 2                                                               |         |                 |      | 38386 | ADD-ACATV |          |          | 28.6427 | 7.06028 | 8.70E-08 |                         |
| 3                                                               | TMEM158 | ENSG00000249992 | M2   | 38386 | ADD-ACATO |          |          | 31.4639 | 7.69211 | 2.03E-08 |                         |
| 3                                                               |         |                 |      | 38386 | ADD-ACATV |          |          | 31.0289 | 7.5948  | 2.54E-08 |                         |
| 3                                                               |         |                 |      | 38386 | ADD-SKAT  |          |          | 33.1985 | 8.07979 | 8.32E-09 |                         |
| 3                                                               |         |                 |      | 38386 | ADD-SKATO |          |          | 32.6845 | 7.96498 | 1.08E-08 |                         |
| 3                                                               | ATP13A5 | ENSG00000187527 | M2   | 38386 | ADD-ACATV |          |          | 26.9411 | 6.67831 | 2.10E-07 |                         |
| 6                                                               | TREM2   | ENSG00000095970 | M2   | 38386 | ADD-ACATO |          |          | 28.0435 | 6.92584 | 1.19E-07 | TREM2,TREML2,UNC5<br>CL |
| 6                                                               |         |                 |      | 38386 | ADD-SKAT  |          |          | 25.5116 | 6.35681 | 4.40E-07 |                         |
| 6                                                               |         |                 |      | 38386 | ADD-SKATO |          |          | 27.6733 | 6.84275 | 1.44E-07 |                         |
| 6                                                               |         |                 |      | 38386 | ADD       | 0.401752 | 0.075942 | 27.4404 | 6.79045 | 1.62E-07 |                         |
| 6                                                               | ULBP2   | ENSG00000131015 | M2   | 38386 | ADD-ACATO |          |          | 34.8986 | 8.45926 | 3.47E-09 |                         |
| 6                                                               |         |                 |      | 38386 | ADD-ACATV |          |          | 39.1828 | 9.4135  | 3.86E-10 |                         |
| 7                                                               | RASA4CP | ENSG00000228903 | M3   | 38386 | ADD-ACATV |          |          | 25.601  | 6.37694 | 4.20E-07 |                         |
| 7                                                               | GPC2    | ENSG00000213420 | M2   | 38386 | ADD-ACATO |          |          | 34.3549 | 8.33797 | 4.59E-09 | NYAP1,ZCWPW1            |
| 7                                                               |         |                 |      | 38386 | ADD-ACATV |          |          | 34.496  | 8.36943 | 4.27E-09 |                         |
| 7                                                               |         |                 |      | 38386 | ADD-SKAT  |          |          | 35.8848 | 8.67916 | 2.09E-09 |                         |
| 7                                                               |         |                 |      | 38386 | ADD-SKATO |          |          | 34.3419 | 8.33505 | 4.62E-09 |                         |
| 10                                                              | PPP2R2D | ENSG00000175470 | M3   | 38386 | ADD-ACATO |          |          | 23.1551 | 5.82551 | 1.49E-06 |                         |
| 10                                                              |         |                 |      | 38386 | ADD-SKATO |          |          | 23.0686 | 5.80597 | 1.56E-06 |                         |
| 10                                                              |         |                 | M1   | 38386 | ADD-ACATO |          |          | 30.4143 | 7.45724 | 3.49E-08 |                         |
| 10                                                              |         |                 |      | 38386 | ADD-ACATV |          |          | 31.0192 | 7.59262 | 2.55E-08 |                         |
| 10                                                              |         |                 |      | 38386 | ADD-SKAT  |          |          | 30.6621 | 7.5127  | 3.07E-08 |                         |

|    |         |                 |    |       |           |          |          |         |         |          |        |
|----|---------|-----------------|----|-------|-----------|----------|----------|---------|---------|----------|--------|
| 10 |         |                 |    | 38386 | ADD-SKATO |          |          | 30.635  | 7.50666 | 3.11E-08 |        |
| 10 |         |                 |    | 38386 | ADD       | -0.94053 | 0.19091  | 28.7263 | 7.07903 | 8.34E-08 |        |
| 11 | DEAF1   | ENSG00000177030 | M2 | 38386 | ADD-SKATO |          |          | 23.1497 | 5.8243  | 1.50E-06 |        |
| 11 | CREB3L1 | ENSG00000157613 | M2 | 38386 | ADD-ACATV |          |          | 23.6995 | 5.94843 | 1.13E-06 |        |
| 12 | ACADS   | ENSG00000122971 | M2 | 38386 | ADD-ACATO |          |          | 71.7323 | 16.6083 | 2.46E-17 |        |
| 12 |         |                 |    | 38386 | ADD-ACATV |          |          | 76.0695 | 17.5625 | 2.74E-18 |        |
| 12 |         |                 |    | 38386 | ADD-SKAT  |          |          | 53.757  | 12.6442 | 2.27E-13 |        |
| 12 |         |                 |    | 38386 | ADD-SKATO |          |          | 49.8038 | 11.7698 | 1.70E-12 |        |
| 13 | CCNA1   | ENSG00000133101 | M2 | 38386 | ADD-ACATV |          |          | 23.1903 | 5.83347 | 1.47E-06 |        |
| 13 | ARGLU1  | ENSG00000134884 | M2 | 38386 | ADD-ACATO |          |          | 34.5698 | 8.38591 | 4.11E-09 |        |
| 13 |         |                 |    | 38386 | ADD-SKAT  |          |          | 27.9698 | 6.9093  | 1.23E-07 |        |
| 13 |         |                 |    | 38386 | ADD-SKATO |          |          | 37.0318 | 8.93473 | 1.16E-09 |        |
| 13 |         |                 |    | 38386 | ADD       | -0.56384 | 0.091488 | 41.2457 | 9.8721  | 1.34E-10 |        |
| 14 | TRAV1-1 | ENSG00000255569 | M1 | 38386 | ADD-ACATV |          |          | 23.8058 | 5.97239 | 1.07E-06 |        |
| 14 |         |                 |    | 38386 | ADD-SKAT  |          |          | 23.2066 | 5.83715 | 1.45E-06 |        |
| 14 |         |                 |    | 38386 | ADD-SKATO |          |          | 23.1525 | 5.82493 | 1.50E-06 |        |
| 14 | MYH6    | ENSG00000197616 | M3 | 38386 | ADD-ACATO |          |          | 29.5454 | 7.26263 | 5.46E-08 |        |
| 14 |         |                 |    | 38386 | ADD-ACATV |          |          | 27.3085 | 6.76084 | 1.73E-07 |        |
| 14 |         |                 |    | 38386 | ADD-SKAT  |          |          | 31.3909 | 7.67578 | 2.11E-08 |        |
| 14 |         |                 | M2 | 38386 | ADD-SKATO |          |          | 29.2713 | 7.20121 | 6.29E-08 |        |
| 14 |         |                 |    | 38386 | ADD-ACATO |          |          | 23.7975 | 5.97054 | 1.07E-06 |        |
| 14 |         |                 |    | 38386 | ADD-SKAT  |          |          | 26.4534 | 6.56868 | 2.70E-07 |        |
| 14 |         |                 |    | 38386 | ADD-SKATO |          |          | 24.1771 | 6.05615 | 8.79E-07 |        |
| 14 | PSEN1   | ENSG00000080815 | M2 | 38386 | ADD-ACATO |          |          | 47.9077 | 11.3499 | 4.47E-12 |        |
| 14 |         |                 |    | 38386 | ADD-ACATV |          |          | 52.2192 | 12.3042 | 4.96E-13 |        |
| 14 |         |                 |    | 38386 | ADD-SKAT  |          |          | 24.4308 | 6.11335 | 7.70E-07 |        |
| 14 |         |                 |    | 38386 | ADD-SKATO |          |          | 24.5136 | 6.13203 | 7.38E-07 |        |
| 14 | VASH1   | ENSG00000071246 | M2 | 38386 | ADD-ACATO |          |          | 23.9973 | 6.01561 | 9.65E-07 |        |
| 14 |         |                 |    | 38386 | ADD-ACATV |          |          | 28.2391 | 6.96973 | 1.07E-07 |        |
| 14 | SPTLC2  | ENSG00000100596 | M2 | 38386 | ADD-ACATO |          |          | 25.6323 | 6.38399 | 4.13E-07 |        |
| 14 |         |                 |    | 38386 | ADD-ACATV |          |          | 29.8826 | 7.33818 | 4.59E-08 |        |
| 15 | POLR2M  | ENSG00000255529 | M2 | 38386 | ADD-ACATO |          |          | 25.0095 | 6.24376 | 5.70E-07 | ADAM10 |
| 15 |         |                 |    | 38386 | ADD-ACATV |          |          | 29.2569 | 7.19798 | 6.34E-08 |        |
| 15 | AKAP13  | ENSG00000170776 | M2 | 38386 | ADD-ACATV |          |          | 24.6382 | 6.1601  | 6.92E-07 |        |
| 16 | METTL22 | ENSG00000067365 | M3 | 38386 | ADD-ACATV |          |          | 23.1467 | 5.82363 | 1.50E-06 |        |
| 16 | SBK1    | ENSG00000188322 | M1 | 38375 | ADD       | 0.840013 | 0.168045 | 25.4871 | 6.3513  | 4.45E-07 |        |
| 16 | MMP15   | ENSG00000102996 | M2 | 38386 | ADD-ACATO |          |          | 28.5078 | 7.03002 | 9.33E-08 |        |
| 16 |         |                 |    | 38386 | ADD-ACATV |          |          | 32.6994 | 7.9683  | 1.08E-08 |        |
| 16 |         |                 |    | 38386 | ADD-SKAT  |          |          | 24.7737 | 6.19063 | 6.45E-07 |        |

|       |                                                                              |                 |    |       |           |          |          |         |         |          |               |
|-------|------------------------------------------------------------------------------|-----------------|----|-------|-----------|----------|----------|---------|---------|----------|---------------|
| 16    | ANKRD11                                                                      | ENSG00000167522 | M2 | 38386 | ADD-ACATO |          |          | 37.8992 | 9.12788 | 7.45E-10 | PRDM7         |
| 16    |                                                                              |                 |    | 38386 | ADD-ACATV |          |          | 42.1912 | 10.0821 | 8.28E-11 |               |
| 17    | PRPSAP2                                                                      | ENSG00000141127 | M3 | 38386 | ADD-ACATO |          |          | 38.8632 | 9.34241 | 4.55E-10 | MYO15A        |
| 17    |                                                                              |                 |    | 38386 | ADD-ACATV |          |          | 42.6252 | 10.1785 | 6.63E-11 |               |
| 17    |                                                                              |                 |    | 38386 | ADD-SKAT  |          |          | 34.1922 | 8.30165 | 4.99E-09 |               |
| 17    |                                                                              |                 |    | 38386 | ADD-SKATO |          |          | 34.7346 | 8.42268 | 3.78E-09 |               |
| 17    |                                                                              |                 |    | 38386 | ADD       | -0.34491 | 0.070664 | 24.8548 | 6.20891 | 6.18E-07 |               |
| 17    | KRT23                                                                        | ENSG00000108244 | M2 | 38386 | ADD-ACATV |          |          | 27.0183 | 6.69564 | 2.02E-07 |               |
| 17    | SMURF2                                                                       | ENSG00000108854 | M2 | 38386 | ADD-ACATO |          |          | 26.0311 | 6.47371 | 3.36E-07 |               |
| 17    |                                                                              |                 |    | 38386 | ADD-ACATV |          |          | 30.2587 | 7.4224  | 3.78E-08 |               |
| 17    | NPTX1                                                                        | ENSG00000171246 | M2 | 38386 | ADD-ACATO |          |          | 24.8284 | 6.20295 | 6.27E-07 |               |
| 17    |                                                                              |                 |    | 38386 | ADD-ACATV |          |          | 29.0749 | 7.15719 | 6.96E-08 |               |
| 17    | METRNL                                                                       | ENSG00000176845 | M2 | 38386 | ADD-ACATO |          |          | 46.8265 | 11.1104 | 7.76E-12 |               |
| 17    |                                                                              |                 |    | 38386 | ADD-ACATV |          |          | 51.1361 | 12.0646 | 8.62E-13 |               |
| 17    |                                                                              |                 |    | 38386 | ADD-SKAT  |          |          | 28.3498 | 6.99458 | 1.01E-07 |               |
| 17    |                                                                              |                 |    | 38386 | ADD-SKATO |          |          | 26.9715 | 6.68513 | 2.06E-07 |               |
| 18    | ZBTB14                                                                       | ENSG00000198081 | M3 | 38386 | ADD-ACATO |          |          | 28.4588 | 7.01903 | 9.57E-08 |               |
| 18    |                                                                              |                 |    | 38386 | ADD-ACATV |          |          | 27.8725 | 6.88746 | 1.30E-07 |               |
| 18    |                                                                              |                 |    | 38386 | ADD-SKAT  |          |          | 28.9001 | 7.11799 | 7.62E-08 |               |
| 18    |                                                                              |                 |    | 38386 | ADD-SKATO |          |          | 28.924  | 7.12335 | 7.53E-08 |               |
| 18    | PIEZO2                                                                       | ENSG00000154864 | M2 | 38386 | ADD-ACATO |          |          | 31.3212 | 7.6602  | 2.19E-08 |               |
| 18    |                                                                              |                 |    | 38386 | ADD-ACATV |          |          | 35.5866 | 8.61269 | 2.44E-09 |               |
| 18    | CABLES1                                                                      | ENSG00000134508 | M2 | 38386 | ADD-ACATV |          |          | 25.2462 | 6.29705 | 5.05E-07 |               |
| 19    | MFSD12                                                                       | ENSG00000161091 | M1 | 38386 | ADD-ACATO |          |          | 41.0831 | 9.83597 | 1.46E-10 |               |
| 19    |                                                                              |                 |    | 38386 | ADD-ACATV |          |          | 39.6266 | 9.51221 | 3.07E-10 |               |
| 19    |                                                                              |                 |    | 38386 | ADD-SKAT  |          |          | 40.8393 | 9.78179 | 1.65E-10 |               |
| 19    |                                                                              |                 |    | 38386 | ADD-SKATO |          |          | 42.0837 | 10.0582 | 8.75E-11 |               |
| 19    |                                                                              |                 |    | 38386 | ADD       | -0.72412 | 0.123127 | 39.1295 | 9.40164 | 3.97E-10 |               |
| 19    | CBLC                                                                         | ENSG00000142273 | M3 | 38386 | ADD-ACATO |          |          | 23.5857 | 5.92273 | 1.19E-06 | APOE          |
| 19    |                                                                              |                 |    | 38386 | ADD-SKAT  |          |          | 24.4654 | 6.12115 | 7.57E-07 |               |
| 19    | KCNC3                                                                        | ENSG00000131398 | M2 | 38386 | ADD-ACATO |          |          | 23.4423 | 5.89037 | 1.29E-06 | CD33;SIGLEC11 |
| 19    |                                                                              |                 |    | 38386 | ADD-SKATO |          |          | 23.0101 | 5.79277 | 1.61E-06 |               |
| 20    | KIF16B                                                                       | ENSG00000089177 | M2 | 38386 | ADD-ACATO |          |          | 71.2288 | 16.4974 | 3.18E-17 |               |
| 20    |                                                                              |                 |    | 38386 | ADD-ACATV |          |          | 63.3629 | 14.7647 | 1.72E-15 |               |
| 20    |                                                                              |                 |    | 38386 | ADD-SKAT  |          |          | 73.4094 | 16.9773 | 1.05E-17 |               |
| 20    |                                                                              |                 |    | 38386 | ADD-SKATO |          |          | 70.2752 | 16.2875 | 5.16E-17 |               |
| Mask1 | stop_lost,start_lost,stop_gained,frameshift_variant,transcript_ablation      |                 |    |       |           |          |          |         |         |          |               |
| Mask2 | inframe_insertion,inframe_deletion,missense_variant,protein_altering_variant |                 |    |       |           |          |          |         |         |          |               |



| Table S4 Carrier vs. non-carrier tests for each gene-phenotype pair |           |         |           |             |             |             |    |             |
|---------------------------------------------------------------------|-----------|---------|-----------|-------------|-------------|-------------|----|-------------|
| phenotype                                                           | N         | gene    | model     | carriers    | estimate    | p.value     | OR | q_by_pheno  |
| Braak                                                               | 5217      | NUP210L | wilcox_HL | 60          | -2.91E-05   | 0.645195835 | NA | 0.832510754 |
|                                                                     |           | CACNA1S | wilcox_HL | 652         | 4.67E-05    | 0.99529348  | NA | 0.99529348  |
|                                                                     |           | GPR37L1 | wilcox_HL | 56          | 6.27E-05    | 0.111314489 | NA | 0.296838638 |
|                                                                     |           | EXO1    | wilcox_HL | 593         | 3.75E-05    | 0.390601621 | NA | 0.651002702 |
|                                                                     |           | PDE11A  | wilcox_HL | 341         | -9.43E-05   | 0.109679021 | NA | 0.296838638 |
|                                                                     |           | TMEM158 | wilcox_HL | 52          | -7.61E-05   | 0.086469556 | NA | 0.266060171 |
|                                                                     |           | ATP13A5 | wilcox_HL | 347         | -4.75E-05   | 0.743649209 | NA | 0.901392981 |
|                                                                     |           | TREM2   | wilcox_HL | 138         | 5.50E-05    | 3.55E-05    | NA | 0.00047354  |
|                                                                     |           | ULBP2   | wilcox_HL | 126         | 4.47E-05    | 0.068824567 | NA | 0.229415222 |
|                                                                     |           | RASA4CP | wilcox_HL | 65          | 5.61E-05    | 0.004589431 | NA | 0.030596208 |
|                                                                     |           | GPC2    | wilcox_HL | 85          | -7.78E-05   | 0.277461673 | NA | 0.528498425 |
|                                                                     |           | PPP2R2D | wilcox_HL | 95          | -9.22E-07   | 0.259904325 | NA | 0.51980865  |
|                                                                     |           | DEAF1   | wilcox_HL | 280         | -6.72E-06   | 0.147879901 | NA | 0.369699752 |
|                                                                     |           | CREB3L1 | wilcox_HL | 215         | -7.62E-06   | 0.203753172 | NA | 0.452784827 |
|                                                                     |           | ACADS   | wilcox_HL | 59          | 4.30E-05    | 0.167551548 | NA | 0.394238937 |
|                                                                     |           | CCNA1   | wilcox_HL | 51          | 1.57E-05    | 0.007342265 | NA | 0.041955801 |
|                                                                     |           | ARGLU1  | wilcox_HL | 52          | -3.92E-05   | 0.306026238 | NA | 0.542917054 |
|                                                                     |           | TRAV1-1 | wilcox_HL | 14          | -1.80E-05   | 0.864432868 | NA | 0.93452202  |
|                                                                     |           | MYH6    | wilcox_HL | 813         | 4.47E-06    | 8.13E-06    | NA | 0.000162672 |
|                                                                     |           | PSEN1   | wilcox_HL | 87          | 0.999952728 | 2.41E-10    | NA | 9.64E-09    |
|                                                                     |           | VASH1   | wilcox_HL | 28          | 4.63E-05    | 0.055350353 | NA | 0.228678232 |
|                                                                     |           | SPTLC2  | wilcox_HL | 59          | 1.67E-05    | 0.239029984 | NA | 0.503221019 |
|                                                                     |           | POLR2M  | wilcox_HL | 133         | 6.71E-05    | 0.000638726 | NA | 0.005109804 |
|                                                                     |           | AKAP13  | wilcox_HL | 669         | 3.52E-05    | 0.588835179 | NA | 0.812186454 |
|                                                                     |           | METTL22 | wilcox_HL | 17          | 0.999982841 | 0.031797415 | NA | 0.158987074 |
|                                                                     |           | SBK1    | wilcox_HL | 49          | -1.66E-05   | 0.691852129 | NA | 0.864815161 |
|                                                                     |           | MMP15   | wilcox_HL | 251         | 3.65E-05    | 0.858983055 | NA | 0.93452202  |
|                                                                     |           | ANKRD11 | wilcox_HL | 550         | -2.89E-05   | 0.791232486 | NA | 0.904265699 |
|                                                                     |           | PRPSAP2 | wilcox_HL | 86          | -5.41E-05   | 0.065061062 | NA | 0.229415222 |
|                                                                     |           | KRT23   | wilcox_HL | 81          | -2.93E-05   | 0.548643662 | NA | 0.78377666  |
|                                                                     |           | SMURF2  | wilcox_HL | 97          | -7.09E-05   | 0.619295847 | NA | 0.825727796 |
|                                                                     |           | NPTX1   | wilcox_HL | 60          | 8.12E-05    | 0.057169558 | NA | 0.228678232 |
|                                                                     |           | METRNL  | wilcox_HL | 210         | -1.52E-05   | 0.488233936 | NA | 0.751129133 |
|                                                                     |           | ZBTB14  | wilcox_HL | 47          | 3.34E-05    | 0.785428854 | NA | 0.904265699 |
| PIEZO2                                                              | wilcox_HL | 488     | -3.14E-05 | 0.956039365 | NA          | 0.980553195 |    |             |
| CABLES1                                                             | wilcox_HL | 236     | 4.58E-05  | 0.546308522 | NA          | 0.78377666  |    |             |
| MFSD12                                                              | wilcox_HL | 35      | -7.63E-05 | 0.312177306 | NA          | 0.542917054 |    |             |
| CBLC                                                                | wilcox_HL | 240     | 3.21E-07  | 6.31E-05    | NA          | 0.000631178 |    |             |
| KCNC3                                                               | wilcox_HL | 161     | -4.99E-05 | 0.407429137 | NA          | 0.651886619 |    |             |
| KIF16B                                                              | wilcox_HL | 376     | -1.16E-05 | 0.896978409 | NA          | 0.944187799 |    |             |
| NUP210L                                                             | wilcox_HL | 35      | -5.78E-05 | 0.108767697 | NA          | 0.290047191 |    |             |
| CACNA1S                                                             | wilcox_HL | 475     | 1.53E-05  | 0.134917387 | NA          | 0.325939437 |    |             |
| GPR37L1                                                             | wilcox_HL | 37      | 2.27E-05  | 0.293858885 | NA          | 0.511058931 |    |             |
| EXO1                                                                | wilcox_HL | 444     | 2.87E-05  | 0.740402371 | NA          | 0.846174138 |    |             |
| PDE11A                                                              | wilcox_HL | 250     | -5.83E-05 | 0.677133659 | NA          | 0.841513334 |    |             |
| TMEM158                                                             | wilcox_HL | 32      | -3.99E-05 | 0.206658331 | NA          | 0.395608525 |    |             |
| ATP13A5                                                             | wilcox_HL | 278     | 1.36E-05  | 0.044466742 | NA          | 0.197629964 |    |             |
| TREM2                                                               | wilcox_HL | 100     | 3.71E-05  | 0.000864337 | NA          | 0.008899684 |    |             |
| ULBP2                                                               | wilcox_HL | 101     | 2.01E-05  | 0.001726778 | NA          | 0.012070051 |    |             |
| RASA4CP                                                             | wilcox_HL | 49      | 7.21E-05  | 0.003124533 | NA          | 0.017854476 |    |             |
| GPC2                                                                | wilcox_HL | 55      | -3.72E-05 | 0.60802014  | NA          | 0.784542117 |    |             |
| PPP2R2D                                                             | wilcox_HL | 66      | -8.96E-05 | 0.433335479 | NA          | 0.685887016 |    |             |
| DEAF1                                                               | wilcox_HL | 216     | 2.31E-05  | 0.983861852 | NA          | 0.983861852 |    |             |

CERAD

3842

|         |           |     |           |             |    |             |
|---------|-----------|-----|-----------|-------------|----|-------------|
| CREB3L1 | wilcox_HL | 157 | -4.60E-05 | 0.052467081 | NA | 0.209868325 |
| ACADS   | wilcox_HL | 40  | 2.53E-05  | 0.067542273 | NA | 0.22514091  |
| CCNA1   | wilcox_HL | 42  | 2.74E-05  | 0.018547608 | NA | 0.092738038 |
| ARGLU1  | wilcox_HL | 37  | -3.41E-05 | 0.138524261 | NA | 0.325939437 |
| TRAV1-1 | wilcox_HL | 14  | -5.10E-05 | 0.82987795  | NA | 0.917356222 |
| MYH6    | wilcox_HL | 607 | 3.50E-05  | 0.000889968 | NA | 0.008899684 |
| PSEN1   | wilcox_HL | 61  | 5.21E-05  | 3.45E-06    | NA | 7.68E-05    |
| VASH1   | wilcox_HL | 20  | 5.02E-05  | 0.170440554 | NA | 0.358822218 |
| SPTLC2  | wilcox_HL | 42  | 4.88E-05  | 0.207694476 | NA | 0.395608525 |
| POLR2M  | wilcox_HL | 103 | 2.39E-05  | 0.001810508 | NA | 0.012070051 |
| AKAP13  | wilcox_HL | 483 | 1.93E-05  | 0.47388051  | NA | 0.702045199 |
| METTL22 | wilcox_HL | 15  | 4.96E-05  | 0.097274516 | NA | 0.290047191 |
| SBK1    | wilcox_HL | 35  | -2.18E-05 | 0.57960711  | NA | 0.77280948  |
| MMP15   | wilcox_HL | 176 | -2.69E-05 | 0.257069212 | NA | 0.467398567 |
| ANKRD11 | wilcox_HL | 399 | 4.53E-05  | 0.05897545  | NA | 0.214456183 |
| PRPSAP2 | wilcox_HL | 57  | -3.41E-05 | 0.106696809 | NA | 0.290047191 |
| KRT23   | wilcox_HL | 58  | -1.59E-05 | 0.974210679 | NA | 0.983861852 |
| SMURF2  | wilcox_HL | 69  | 4.56E-05  | 0.44582656  | NA | 0.685887016 |
| NPTX1   | wilcox_HL | 49  | 1.49E-06  | 0.727521543 | NA | 0.846174138 |
| METRNL  | wilcox_HL | 155 | -9.18E-05 | 0.6942485   | NA | 0.841513334 |
| ZBTB14  | wilcox_HL | 25  | -7.87E-05 | 0.16654863  | NA | 0.358822218 |
| PIEZO2  | wilcox_HL | 363 | 2.54E-05  | 0.499381967 | NA | 0.71340281  |
| CABLES1 | wilcox_HL | 184 | 2.70E-05  | 0.401739091 | NA | 0.669565152 |
| MFSD12  | wilcox_HL | 19  | -2.64E-06 | 0.550748174 | NA | 0.759652653 |
| CBLC    | wilcox_HL | 177 | 7.42E-05  | 3.84E-06    | NA | 7.68E-05    |
| KCNC3   | wilcox_HL | 110 | -1.60E-05 | 0.879283069 | NA | 0.925561125 |
| KIF16B  | wilcox_HL | 276 | -5.19E-05 | 0.848554505 | NA | 0.917356222 |

Tau

2183

|         |           |     |              |             |    |             |
|---------|-----------|-----|--------------|-------------|----|-------------|
| NUP210L | wilcox_HL | 34  | -0.144955904 | 0.421460344 | NA | 0.720465195 |
| CACNA1S | wilcox_HL | 318 | -0.066172194 | 0.306367303 | NA | 0.583556768 |
| GPR37L1 | wilcox_HL | 33  | 0.355169731  | 0.050902373 | NA | 0.254511866 |
| EXO1    | wilcox_HL | 260 | -0.078618318 | 0.261995194 | NA | 0.551568828 |
| PDE11A  | wilcox_HL | 147 | 0.04679737   | 0.613523499 | NA | 0.791643225 |
| TMEM158 | wilcox_HL | 45  | 0.102290837  | 0.504325636 | NA | 0.720465195 |
| ATP13A5 | wilcox_HL | 153 | -0.09564498  | 0.298723416 | NA | 0.583556768 |
| TREM2   | wilcox_HL | 43  | 0.282264044  | 0.089041603 | NA | 0.296805343 |
| ULBP2   | wilcox_HL | 63  | -0.215015754 | 0.110364973 | NA | 0.315328493 |
| RASA4CP | wilcox_HL | 89  | -0.145294284 | 0.190015531 | NA | 0.447095368 |
| GPC2    | wilcox_HL | 37  | -0.218821068 | 0.217399969 | NA | 0.483111042 |
| PPP2R2D | wilcox_HL | 60  | 0.070872604  | 0.595952099 | NA | 0.791643225 |
| DEAF1   | wilcox_HL | 102 | 0.035845117  | 0.725904364 | NA | 0.900663509 |
| CREB3L1 | wilcox_HL | 102 | -0.37691972  | 0.000460097 | NA | 0.01690907  |
| ACADS   | wilcox_HL | 23  | 0.363251722  | 0.107121523 | NA | 0.315328493 |
| CCNA1   | wilcox_HL | 30  | -0.108585045 | 0.589589206 | NA | 0.791643225 |
| ARGLU1  | wilcox_HL | 36  | 0.002729844  | 0.988300038 | NA | 0.988300038 |
| TRAV1-1 | wilcox_HL | 11  | 0.031123112  | 0.91141277  | NA | 0.988300038 |
| MYH6    | wilcox_HL | 329 | 0.018650576  | 0.769423267 | NA | 0.900663509 |
| PSEN1   | wilcox_HL | 25  | 0.180314851  | 0.501120426 | NA | 0.720465195 |
| VASH1   | wilcox_HL | 12  | -0.028872811 | 0.938867105 | NA | 0.988300038 |
| SPTLC2  | wilcox_HL | 25  | 0.381924904  | 0.076797017 | NA | 0.279261881 |
| POLR2M  | wilcox_HL | 64  | -0.247805757 | 0.074836791 | NA | 0.279261881 |
| AKAP13  | wilcox_HL | 287 | -0.179213453 | 0.009556494 | NA | 0.127419918 |
| METTL22 | wilcox_HL | 24  | -0.341762704 | 0.129272749 | NA | 0.344727331 |
| SBK1    | wilcox_HL | 35  | -0.419636051 | 0.019581732 | NA | 0.168205898 |
| MMP15   | wilcox_HL | 103 | -0.030088907 | 0.78808057  | NA | 0.900663509 |
| ANKRD11 | wilcox_HL | 540 | -0.175640079 | 0.000845453 | NA | 0.01690907  |

|  |  |         |           |     |              |             |    |             |
|--|--|---------|-----------|-----|--------------|-------------|----|-------------|
|  |  | PRPSAP2 | wilcox_HL | 43  | -0.312148255 | 0.061883992 | NA | 0.275039963 |
|  |  | KRT23   | wilcox_HL | 50  | -0.221462419 | 0.142078449 | NA | 0.355196124 |
|  |  | SMURF2  | wilcox_HL | 42  | 0.11543172   | 0.457149569 | NA | 0.720465195 |
|  |  | NPTX1   | wilcox_HL | 29  | -0.4325963   | 0.025748152 | NA | 0.171654348 |
|  |  | METRNL  | wilcox_HL | 89  | 0.037010609  | 0.760341238 | NA | 0.900663509 |
|  |  | ZBTB14  | wilcox_HL | 38  | -0.004313421 | 0.979390192 | NA | 0.988300038 |
|  |  | PIEZO2  | wilcox_HL | 201 | -0.057617543 | 0.480451029 | NA | 0.720465195 |
|  |  | CABLES1 | wilcox_HL | 107 | 0.070125721  | 0.486318211 | NA | 0.720465195 |
|  |  | MFSD12  | wilcox_HL | 23  | 0.00734868   | 0.969094833 | NA | 0.988300038 |
|  |  | CBLC    | wilcox_HL | 108 | 0.212113082  | 0.037421103 | NA | 0.213834873 |
|  |  | KCNC3   | wilcox_HL | 60  | -0.096520065 | 0.489381104 | NA | 0.720465195 |
|  |  | KIF16B  | wilcox_HL | 158 | -0.202104844 | 0.021025737 | NA | 0.168205898 |
|  |  | NUP210L | wilcox_HL | 34  | -0.034214039 | 0.84527859  | NA | 0.913814692 |
|  |  | CACNA1S | wilcox_HL | 321 | -0.073488829 | 0.256688496 | NA | 0.603972931 |
|  |  | GPR37L1 | wilcox_HL | 34  | 0.378390801  | 0.038741267 | NA | 0.186453408 |
|  |  | EXO1    | wilcox_HL | 259 | -0.017310027 | 0.802670265 | NA | 0.913814692 |
|  |  | PDE11A  | wilcox_HL | 146 | 0.001829438  | 0.981549209 | NA | 0.981549209 |
|  |  | TMEM158 | wilcox_HL | 45  | 0.021506448  | 0.906152261 | NA | 0.943457237 |
|  |  | ATP13A5 | wilcox_HL | 149 | -0.076571368 | 0.389254625 | NA | 0.865010278 |
|  |  | TREM2   | wilcox_HL | 43  | 0.324098996  | 0.034063009 | NA | 0.186453408 |
|  |  | ULBP2   | wilcox_HL | 68  | -0.030484735 | 0.830131688 | NA | 0.913814692 |
|  |  | RASA4CP | wilcox_HL | 89  | 0.052168031  | 0.64063742  | NA | 0.907380316 |
|  |  | GPC2    | wilcox_HL | 36  | -0.294891163 | 0.092944691 | NA | 0.309815637 |
|  |  | PPP2R2D | wilcox_HL | 59  | -0.06571067  | 0.620629677 | NA | 0.907380316 |
|  |  | DEAF1   | wilcox_HL | 101 | 0.021125058  | 0.842766594 | NA | 0.913814692 |
|  |  | CREB3L1 | wilcox_HL | 101 | -0.337757883 | 0.001580414 | NA | 0.034750686 |
|  |  | ACADS   | wilcox_HL | 24  | 0.125298586  | 0.551725742 | NA | 0.907380316 |
|  |  | CCNA1   | wilcox_HL | 30  | -0.140362785 | 0.51850892  | NA | 0.907380316 |
|  |  | ARGLU1  | wilcox_HL | 36  | 0.082554058  | 0.665504238 | NA | 0.907380316 |
|  |  | TRAV1-1 | wilcox_HL | 10  | -0.349467301 | 0.24881304  | NA | 0.603972931 |
|  |  | MYH6    | wilcox_HL | 327 | 0.020280075  | 0.748588761 | NA | 0.907380316 |
|  |  | PSEN1   | wilcox_HL | 23  | 0.079401239  | 0.726102282 | NA | 0.907380316 |
|  |  | VASH1   | wilcox_HL | 11  | -0.033915066 | 0.919870806 | NA | 0.943457237 |
|  |  | SPTLC2  | wilcox_HL | 25  | 0.143462207  | 0.532649744 | NA | 0.907380316 |
|  |  | POLR2M  | wilcox_HL | 66  | -0.082184187 | 0.508402761 | NA | 0.907380316 |
|  |  | AKAP13  | wilcox_HL | 285 | -0.142079576 | 0.03588892  | NA | 0.186453408 |
|  |  | METTL22 | wilcox_HL | 23  | -0.293415494 | 0.166592711 | NA | 0.475979173 |
|  |  | SBK1    | wilcox_HL | 35  | -0.3765331   | 0.041952017 | NA | 0.186453408 |
|  |  | MMP15   | wilcox_HL | 105 | 0.034589818  | 0.741667928 | NA | 0.907380316 |
|  |  | ANKRD11 | wilcox_HL | 548 | -0.069881302 | 0.179934816 | NA | 0.479826176 |
|  |  | PRPSAP2 | wilcox_HL | 43  | -0.536979378 | 0.001737534 | NA | 0.034750686 |
|  |  | KRT23   | wilcox_HL | 50  | -0.218769769 | 0.125861718 | NA | 0.387266826 |
|  |  | SMURF2  | wilcox_HL | 42  | 0.268726763  | 0.091101135 | NA | 0.309815637 |
|  |  | NPTX1   | wilcox_HL | 29  | -0.429559982 | 0.02184698  | NA | 0.174775838 |
|  |  | METRNL  | wilcox_HL | 88  | -0.062329295 | 0.597080682 | NA | 0.907380316 |
|  |  | ZBTB14  | wilcox_HL | 38  | -0.110458498 | 0.5175936   | NA | 0.907380316 |
|  |  | PIEZO2  | wilcox_HL | 202 | -0.209777155 | 0.009797801 | NA | 0.110145409 |
|  |  | CABLES1 | wilcox_HL | 103 | 0.041189453  | 0.685177174 | NA | 0.907380316 |
|  |  | MFSD12  | wilcox_HL | 23  | -0.128231646 | 0.590987455 | NA | 0.907380316 |
|  |  | CBLC    | wilcox_HL | 109 | 0.261805748  | 0.011014541 | NA | 0.110145409 |
|  |  | KCNC3   | wilcox_HL | 60  | -0.068088958 | 0.630050673 | NA | 0.907380316 |
|  |  | KIF16B  | wilcox_HL | 159 | -0.155586266 | 0.072675977 | NA | 0.290703907 |
|  |  | NUP210L | wilcox_HL | 33  | 2.50E-05     | 0.228563877 | NA | 0.868582931 |
|  |  | CACNA1S | wilcox_HL | 458 | 4.95E-05     | 0.512106322 | NA | 0.868582931 |
|  |  | GPR37L1 | wilcox_HL | 36  | 7.92E-05     | 0.547356513 | NA | 0.868582931 |

pTau-181

2175

LEWY\_full

3706

|         |           |     |           |             |    |             |
|---------|-----------|-----|-----------|-------------|----|-------------|
| EXO1    | wilcox_HL | 426 | -3.46E-05 | 0.080223671 | NA | 0.77649948  |
| PDE11A  | wilcox_HL | 238 | -4.85E-05 | 0.093368662 | NA | 0.77649948  |
| TMEM158 | wilcox_HL | 32  | -7.01E-05 | 0.947049321 | NA | 0.978340381 |
| ATP13A5 | wilcox_HL | 265 | 5.16E-05  | 0.271462359 | NA | 0.868582931 |
| TREM2   | wilcox_HL | 99  | 3.63E-05  | 0.284456772 | NA | 0.868582931 |
| ULBP2   | wilcox_HL | 95  | 5.87E-05  | 0.194014835 | NA | 0.868582931 |
| RASA4CP | wilcox_HL | 44  | 4.59E-05  | 0.469859378 | NA | 0.868582931 |
| GPC2    | wilcox_HL | 54  | -4.22E-05 | 0.116474922 | NA | 0.77649948  |
| PPP2R2D | wilcox_HL | 65  | 3.32E-05  | 0.237792442 | NA | 0.868582931 |
| DEAF1   | wilcox_HL | 209 | -5.84E-05 | 0.236333987 | NA | 0.868582931 |
| CREB3L1 | wilcox_HL | 154 | 7.27E-05  | 0.767370631 | NA | 0.902788977 |
| ACADS   | wilcox_HL | 39  | 3.28E-05  | 0.116180681 | NA | 0.77649948  |
| CCNA1   | wilcox_HL | 41  | -6.33E-05 | 0.418433363 | NA | 0.868582931 |
| ARGLU1  | wilcox_HL | 36  | -6.96E-05 | 0.660927102 | NA | 0.868582931 |
| TRAV1-1 | wilcox_HL | 14  | -5.35E-05 | 0.408276049 | NA | 0.868582931 |
| MYH6    | wilcox_HL | 588 | 8.29E-05  | 0.622829401 | NA | 0.868582931 |
| PSEN1   | wilcox_HL | 61  | 6.70E-05  | 0.071919693 | NA | 0.77649948  |
| VASH1   | wilcox_HL | 19  | 1.43E-05  | 0.51891759  | NA | 0.868582931 |
| SPTLC2  | wilcox_HL | 39  | 2.48E-05  | 0.695101932 | NA | 0.868582931 |
| POLR2M  | wilcox_HL | 97  | 9.69E-06  | 0.346539751 | NA | 0.868582931 |
| AKAP13  | wilcox_HL | 468 | -3.23E-05 | 0.90797969  | NA | 0.978340381 |
| METTL22 | wilcox_HL | 13  | -5.69E-05 | 0.413508333 | NA | 0.868582931 |
| SBK1    | wilcox_HL | 35  | -1.49E-06 | 0.700537478 | NA | 0.868582931 |
| MMP15   | wilcox_HL | 167 | -6.13E-06 | 0.716580918 | NA | 0.868582931 |
| ANKRD11 | wilcox_HL | 384 | 5.15E-05  | 0.410947109 | NA | 0.868582931 |
| PRPSAP2 | wilcox_HL | 56  | -5.48E-05 | 0.953881871 | NA | 0.978340381 |
| KRT23   | wilcox_HL | 55  | -1.10E-05 | 0.628131943 | NA | 0.868582931 |
| SMURF2  | wilcox_HL | 68  | 1.12E-05  | 0.939030325 | NA | 0.978340381 |
| NPTX1   | wilcox_HL | 44  | -7.73E-05 | 0.405309828 | NA | 0.868582931 |
| METRNL  | wilcox_HL | 149 | -5.43E-05 | 0.670537172 | NA | 0.868582931 |
| ZBTB14  | wilcox_HL | 25  | 3.65E-05  | 0.994620352 | NA | 0.994620352 |
| PIEZO2  | wilcox_HL | 344 | -2.36E-05 | 0.45032611  | NA | 0.868582931 |
| CABLES1 | wilcox_HL | 179 | -6.62E-05 | 0.819956153 | NA | 0.937092746 |
| MFSD12  | wilcox_HL | 18  | -6.89E-05 | 0.657214684 | NA | 0.868582931 |
| CBLC    | wilcox_HL | 164 | 5.41E-05  | 0.010757348 | NA | 0.430293918 |
| KCNC3   | wilcox_HL | 108 | -3.01E-05 | 0.628095831 | NA | 0.868582931 |
| KIF16B  | wilcox_HL | 265 | 1.11E-05  | 0.325571414 | NA | 0.868582931 |
| NUP210L | wilcox_HL | 33  | 4.68E-05  | 0.268003614 | NA | 0.536007229 |
| CACNA1S | wilcox_HL | 413 | -1.18E-06 | 0.018198945 | NA | 0.2445191   |
| GPR37L1 | wilcox_HL | 34  | 3.68E-05  | 0.010257838 | NA | 0.2445191   |
| EXO1    | wilcox_HL | 395 | -3.86E-05 | 0.472765789 | NA | 0.652090744 |
| PDE11A  | wilcox_HL | 216 | 4.07E-05  | 0.038683783 | NA | 0.2445191   |
| TMEM158 | wilcox_HL | 26  | 7.70E-06  | 0.846785983 | NA | 0.96271448  |
| ATP13A5 | wilcox_HL | 240 | 3.43E-05  | 0.042790843 | NA | 0.2445191   |
| TREM2   | wilcox_HL | 89  | -6.34E-05 | 0.443013028 | NA | 0.644739799 |
| ULBP2   | wilcox_HL | 90  | -2.57E-06 | 0.240009889 | NA | 0.533272279 |
| RASA4CP | wilcox_HL | 41  | -1.18E-05 | 0.241847542 | NA | 0.533272279 |
| GPC2    | wilcox_HL | 44  | 8.71E-05  | 0.300156944 | NA | 0.571727512 |
| PPP2R2D | wilcox_HL | 54  | 2.39E-05  | 0.036647956 | NA | 0.2445191   |
| DEAF1   | wilcox_HL | 184 | 1.83E-05  | 0.332767704 | NA | 0.584928382 |
| CREB3L1 | wilcox_HL | 140 | -2.02E-05 | 0.080222777 | NA | 0.280433158 |
| ACADS   | wilcox_HL | 37  | 5.06E-05  | 0.223699248 | NA | 0.533272279 |
| CCNA1   | wilcox_HL | 34  | -3.97E-05 | 0.965216126 | NA | 0.965216126 |
| ARGLU1  | wilcox_HL | 32  | -4.49E-05 | 0.937394086 | NA | 0.96271448  |
| TRAV1-1 | wilcox_HL | 13  | -4.11E-05 | 0.855921165 | NA | 0.96271448  |

|         |           |         |           |             |            |             |           |             |    |             |
|---------|-----------|---------|-----------|-------------|------------|-------------|-----------|-------------|----|-------------|
| CVD_ART | 3367      | MYH6    | wilcox_HL | 537         | 9.36E-06   | 0.642559177 | NA        | 0.803198972 |    |             |
|         |           | PSEN1   | wilcox_HL | 57          | -5.97E-06  | 0.511660987 | NA        | 0.660207725 |    |             |
|         |           | VASH1   | wilcox_HL | 18          | 2.45E-05   | 0.451317859 | NA        | 0.644739799 |    |             |
|         |           | SPTLC2  | wilcox_HL | 38          | 1.06E-06   | 0.059206597 | NA        | 0.263140431 |    |             |
|         |           | POLR2M  | wilcox_HL | 84          | -1.44E-05  | 0.091670623 | NA        | 0.282063457 |    |             |
|         |           | AKAP13  | wilcox_HL | 422         | 4.08E-05   | 0.33633382  | NA        | 0.584928382 |    |             |
|         |           | METTL22 | wilcox_HL | 8           | -0.9999746 | 0.080463831 | NA        | 0.280433158 |    |             |
|         |           | SBK1    | wilcox_HL | 29          | -4.44E-05  | 0.395378792 | NA        | 0.616532234 |    |             |
|         |           | MMP15   | wilcox_HL | 151         | 2.46E-05   | 0.376805066 | NA        | 0.616532234 |    |             |
|         |           | ANKRD11 | wilcox_HL | 354         | 2.60E-05   | 0.15051583  | NA        | 0.401375547 |    |             |
|         |           | PRPSAP2 | wilcox_HL | 54          | 1.47E-05   | 0.018767423 | NA        | 0.2445191   |    |             |
|         |           | KRT23   | wilcox_HL | 54          | 4.77E-05   | 0.86662288  | NA        | 0.96271448  |    |             |
|         |           | SMURF2  | wilcox_HL | 61          | 1.55E-05   | 0.03008988  | NA        | 0.2445191   |    |             |
|         |           | NPTX1   | wilcox_HL | 43          | 1.36E-05   | 0.253304332 | NA        | 0.533272279 |    |             |
|         |           | METRNL  | wilcox_HL | 138         | 4.00E-05   | 0.938646618 | NA        | 0.96271448  |    |             |
|         |           | ZBTB14  | wilcox_HL | 23          | 5.63E-05   | 0.054690294 | NA        | 0.263140431 |    |             |
|         |           | PIEZO2  | wilcox_HL | 317         | -3.95E-05  | 0.10408083  | NA        | 0.297373801 |    |             |
|         |           | CABLES1 | wilcox_HL | 170         | -1.13E-06  | 0.681412051 | NA        | 0.825954002 |    |             |
|         |           | MFSD12  | wilcox_HL | 18          | 3.64E-05   | 0.936391287 | NA        | 0.96271448  |    |             |
|         |           | CBLC    | wilcox_HL | 142         | 2.19E-05   | 0.400745952 | NA        | 0.616532234 |    |             |
|         |           | KCNC3   | wilcox_HL | 103         | -1.82E-05  | 0.489698195 | NA        | 0.652930927 |    |             |
|         |           | KIF16B  | wilcox_HL | 233         | 1.72E-05   | 0.084129947 | NA        | 0.280433158 |    |             |
|         |           | CVD_ATH | 3647      | NUP210L     | wilcox_HL  | 32          | 1.98E-05  | 0.664537391 | NA | 0.901442132 |
|         |           |         |           | CACNA1S     | wilcox_HL  | 448         | -3.66E-05 | 0.600317636 | NA | 0.901442132 |
| GPR37L1 | wilcox_HL |         |           | 35          | -5.78E-06  | 0.832410932 | NA        | 0.901442132 |    |             |
| EXO1    | wilcox_HL |         |           | 422         | 4.69E-05   | 0.79746045  | NA        | 0.901442132 |    |             |
| PDE11A  | wilcox_HL |         |           | 236         | 1.66E-05   | 0.222318503 | NA        | 0.754955176 |    |             |
| TMEM158 | wilcox_HL |         |           | 31          | -9.01E-06  | 0.427400574 | NA        | 0.899790682 |    |             |
| ATP13A5 | wilcox_HL |         |           | 258         | 6.49E-05   | 0.574563613 | NA        | 0.901442132 |    |             |
| TREM2   | wilcox_HL |         |           | 95          | -4.26E-05  | 0.01484527  | NA        | 0.148452702 |    |             |
| ULBP2   | wilcox_HL |         |           | 92          | -3.92E-05  | 0.2790584   | NA        | 0.754955176 |    |             |
| RASA4CP | wilcox_HL |         |           | 43          | -8.03E-05  | 0.012534474 | NA        | 0.148452702 |    |             |
| GPC2    | wilcox_HL |         |           | 55          | 2.47E-05   | 0.986797352 | NA        | 0.986797352 |    |             |
| PPP2R2D | wilcox_HL |         |           | 59          | 8.49E-05   | 0.32085595  | NA        | 0.754955176 |    |             |
| DEAF1   | wilcox_HL |         |           | 208         | -4.45E-05  | 0.305814526 | NA        | 0.754955176 |    |             |
| CREB3L1 | wilcox_HL |         |           | 149         | 5.64E-05   | 0.77042557  | NA        | 0.901442132 |    |             |
| ACADS   | wilcox_HL |         |           | 39          | -3.98E-06  | 0.71014548  | NA        | 0.901442132 |    |             |
| CCNA1   | wilcox_HL |         |           | 38          | -4.52E-05  | 0.534929237 | NA        | 0.901442132 |    |             |
| ARGLU1  | wilcox_HL |         |           | 36          | -1.03E-05  | 0.789763038 | NA        | 0.901442132 |    |             |
| TRAV1-1 | wilcox_HL |         |           | 14          | 1.79E-05   | 0.211350214 | NA        | 0.754955176 |    |             |
| MYH6    | wilcox_HL |         |           | 574         | 4.28E-05   | 0.799461195 | NA        | 0.901442132 |    |             |
| PSEN1   | wilcox_HL |         |           | 58          | -4.36E-05  | 0.027486769 | NA        | 0.219894151 |    |             |
| VASH1   | wilcox_HL |         |           | 18          | -4.67E-05  | 0.758211523 | NA        | 0.901442132 |    |             |
| SPTLC2  | wilcox_HL |         |           | 38          | 2.46E-05   | 0.682520306 | NA        | 0.901442132 |    |             |
| POLR2M  | wilcox_HL |         |           | 93          | -1.59E-05  | 0.856370026 | NA        | 0.901442132 |    |             |
| AKAP13  | wilcox_HL |         |           | 455         | -4.05E-05  | 0.56451636  | NA        | 0.901442132 |    |             |
| METTL22 | wilcox_HL |         |           | 10          | -1.96E-05  | 0.07116213  | NA        | 0.406640742 |    |             |
| SBK1    | wilcox_HL |         |           | 34          | 1.17E-05   | 0.470072214 | NA        | 0.901442132 |    |             |
| MMP15   | wilcox_HL |         |           | 164         | -2.26E-05  | 0.174761245 | NA        | 0.754955176 |    |             |
| ANKRD11 | wilcox_HL |         |           | 378         | 5.49E-05   | 0.63033778  | NA        | 0.901442132 |    |             |
| PRPSAP2 | wilcox_HL |         |           | 57          | 1.67E-05   | 0.913663728 | NA        | 0.937091003 |    |             |
| KRT23   | wilcox_HL |         |           | 57          | -3.58E-05  | 0.851882492 | NA        | 0.901442132 |    |             |
| SMURF2  | wilcox_HL |         |           | 67          | 1.37E-05   | 0.009565447 | NA        | 0.148452702 |    |             |
| NPTX1   | wilcox_HL |         |           | 42          | 2.45E-05   | 0.232713965 | NA        | 0.754955176 |    |             |
| METRNL  | wilcox_HL | 150     | 7.52E-05  | 0.059077865 | NA         | 0.393852435 |           |             |    |             |

|         |           |         |              |             |              |             |    |             |
|---------|-----------|---------|--------------|-------------|--------------|-------------|----|-------------|
|         |           | ZBTB14  | wilcox_HL    | 25          | 1.46E-05     | 0.295505598 | NA | 0.754955176 |
|         |           | PIEZO2  | wilcox_HL    | 342         | -7.19E-05    | 0.000642488 | NA | 0.025699508 |
|         |           | CABLES1 | wilcox_HL    | 176         | 8.03E-05     | 0.557313315 | NA | 0.901442132 |
|         |           | MFSD12  | wilcox_HL    | 18          | -1.01E-05    | 0.561886447 | NA | 0.901442132 |
|         |           | CBLC    | wilcox_HL    | 158         | 7.85E-05     | 0.276869639 | NA | 0.754955176 |
|         |           | KCNC3   | wilcox_HL    | 106         | 5.21E-05     | 0.301626761 | NA | 0.754955176 |
|         |           | KIF16B  | wilcox_HL    | 258         | 3.15E-05     | 0.354508676 | NA | 0.787797059 |
| Age     | 41977     | NUP210L | wilcox_HL    | 1392        | 1.999947453  | 2.36E-12    | NA | 1.35E-11    |
|         |           | CACNA1S | wilcox_HL    | 6029        | -0.999959246 | 2.62E-08    | NA | 1.05E-07    |
|         |           | GPR37L1 | wilcox_HL    | 807         | 1.000043524  | 0.001204333 | NA | 0.002094493 |
|         |           | EXO1    | wilcox_HL    | 5181        | -4.44E-05    | 0.970875911 | NA | 0.983011099 |
|         |           | PDE11A  | wilcox_HL    | 3285        | 8.18E-06     | 0.190858935 | NA | 0.231344164 |
|         |           | TMEM158 | wilcox_HL    | 1051        | 2.000034325  | 3.10E-13    | NA | 2.48E-12    |
|         |           | ATP13A5 | wilcox_HL    | 3839        | -0.999949759 | 0.000338151 | NA | 0.000644097 |
|         |           | TREM2   | wilcox_HL    | 1129        | 3.000031356  | 1.56E-25    | NA | 3.13E-24    |
|         |           | ULBP2   | wilcox_HL    | 1910        | -4.69E-05    | 0.400021189 | NA | 0.444467988 |
|         |           | RASA4CP | wilcox_HL    | 773         | -1.000062083 | 3.35E-05    | NA | 7.88E-05    |
|         |           | GPC2    | wilcox_HL    | 1229        | 1.000005821  | 1.19E-05    | NA | 3.17E-05    |
|         |           | PPP2R2D | wilcox_HL    | 1526        | 1.999996813  | 2.47E-10    | NA | 1.24E-09    |
|         |           | DEAF1   | wilcox_HL    | 2922        | 8.26E-05     | 0.030975916 | NA | 0.044251309 |
|         |           | CREB3L1 | wilcox_HL    | 2492        | 0.999978109  | 0.000130309 | NA | 0.000260618 |
|         |           | ACADS   | wilcox_HL    | 950         | 1.999932047  | 7.03E-07    | NA | 2.01E-06    |
|         |           | CCNA1   | wilcox_HL    | 500         | -1.000022609 | 0.011914842 | NA | 0.018330527 |
|         |           | ARGLU1  | wilcox_HL    | 1113        | 2.000027119  | 1.38E-13    | NA | 1.38E-12    |
|         |           | TRAV1-1 | wilcox_HL    | 273         | 2.999943495  | 5.34E-08    | NA | 1.64E-07    |
|         |           | MYH6    | wilcox_HL    | 8274        | 0.999952805  | 1.41E-05    | NA | 3.51E-05    |
|         |           | PSEN1   | wilcox_HL    | 616         | 5.000021621  | 1.42E-28    | NA | 5.67E-27    |
|         |           | VASH1   | wilcox_HL    | 313         | 2.000014847  | 8.62E-05    | NA | 0.000181533 |
|         |           | SPTLC2  | wilcox_HL    | 724         | 2.36E-05     | 0.891500404 | NA | 0.938421478 |
|         |           | POLR2M  | wilcox_HL    | 1567        | -1.50E-05    | 0.145766945 | NA | 0.188086381 |
|         |           | AKAP13  | wilcox_HL    | 7685        | -5.00E-05    | 0.003311507 | NA | 0.005298411 |
|         |           | METTL22 | wilcox_HL    | 225         | -2.000072256 | 0.001418974 | NA | 0.002364957 |
|         |           | SBK1    | wilcox_HL    | 216         | -0.999932334 | 0.178164343 | NA | 0.222705429 |
|         |           | MMP15   | wilcox_HL    | 3289        | 3.37E-05     | 0.318484732 | NA | 0.37468792  |
|         |           | ANKRD11 | wilcox_HL    | 6415        | -2.07E-05    | 0.000724065 | NA | 0.001316482 |
|         |           | PRPSAP2 | wilcox_HL    | 1505        | 0.999968057  | 6.97E-05    | NA | 0.000154779 |
|         |           | KRT23   | wilcox_HL    | 1707        | 1.49E-05     | 0.356294839 | NA | 0.407194102 |
|         |           | SMURF2  | wilcox_HL    | 1387        | 2.000045714  | 4.52E-19    | NA | 6.02E-18    |
|         |           | NPTX1   | wilcox_HL    | 1024        | -2.53E-05    | 0.099245382 | NA | 0.132327176 |
|         |           | METRNL  | wilcox_HL    | 2429        | -5.62E-05    | 0.983011099 | NA | 0.983011099 |
|         |           | ZBTB14  | wilcox_HL    | 968         | 1.999920594  | 1.47E-09    | NA | 6.54E-09    |
|         |           | PIEZO2  | wilcox_HL    | 6047        | 8.08E-05     | 0.576338826 | NA | 0.623069001 |
|         |           | CABLES1 | wilcox_HL    | 3034        | 1.000062991  | 3.96E-08    | NA | 1.44E-07    |
| MFSD12  | wilcox_HL | 649     | 1.999946691  | 4.58E-08    | NA           | 1.53E-07    |    |             |
| CBLC    | wilcox_HL | 1980    | 0.999984257  | 0.019496281 | NA           | 0.028883379 |    |             |
| KCNC3   | wilcox_HL | 1960    | 2.26E-05     | 0.037058321 | NA           | 0.051114925 |    |             |
| KIF16B  | wilcox_HL | 4557    | 1.000006081  | 1.08E-12    | NA           | 7.22E-12    |    |             |
| NUP210L | wilcox_HL | 271     | -0.999974267 | 0.299859774 | NA           | 0.444236703 |    |             |
| CACNA1S | wilcox_HL | 1638    | -0.999969313 | 0.028003595 | NA           | 0.065890812 |    |             |
| GPR37L1 | wilcox_HL | 221     | -1.52E-05    | 0.794560855 | NA           | 0.858984708 |    |             |
| EXO1    | wilcox_HL | 1365    | -4.16E-05    | 0.978977603 | NA           | 0.978977603 |    |             |
| PDE11A  | wilcox_HL | 842     | -5.70E-05    | 0.433812922 | NA           | 0.57841723  |    |             |
| TMEM158 | wilcox_HL | 194     | -5.21E-05    | 0.646801877 | NA           | 0.739202146 |    |             |
| ATP13A5 | wilcox_HL | 1107    | -1.999919761 | 4.14E-07    | NA           | 4.14E-06    |    |             |
| TREM2   | wilcox_HL | 373     | 1.999965411  | 0.005528251 | NA           | 0.017010002 |    |             |

|               |           |         |           |         |              |             |              |             |
|---------------|-----------|---------|-----------|---------|--------------|-------------|--------------|-------------|
| Age_AmongCase | 11804     | ULBP2   | wilcox_HL | 486     | -0.999961211 | 0.234701235 | NA           | 0.375521977 |
|               |           | RASA4CP | wilcox_HL | 191     | -1.99997938  | 0.013743419 | NA           | 0.036649118 |
|               |           | GPC2    | wilcox_HL | 244     | -4.20E-05    | 0.610205019 | NA           | 0.738345795 |
|               |           | PPP2R2D | wilcox_HL | 298     | 2.999959867  | 8.19E-05    | NA           | 0.000468089 |
|               |           | DEAF1   | wilcox_HL | 682     | 2.81E-05     | 0.923789125 | NA           | 0.947476025 |
|               |           | CREB3L1 | wilcox_HL | 582     | -1.000038839 | 0.013331321 | NA           | 0.036649118 |
|               |           | ACADS   | wilcox_HL | 327     | 4.999984518  | 1.24E-10    | NA           | 2.48E-09    |
|               |           | CCNA1   | wilcox_HL | 107     | 1.000049502  | 0.312486447 | NA           | 0.44640921  |
|               |           | ARGLU1  | wilcox_HL | 165     | 7.68E-05     | 0.906983543 | NA           | 0.947476025 |
|               |           | TRAV1-1 | wilcox_HL | 29      | 2.000010461  | 0.288777627 | NA           | 0.444236703 |
|               |           | MYH6    | wilcox_HL | 2401    | 1.71E-05     | 0.347169145 | NA           | 0.478853993 |
|               |           | PSEN1   | wilcox_HL | 249     | 11.00001695  | 9.82E-35    | NA           | 3.93E-33    |
|               |           | VASH1   | wilcox_HL | 85      | 4.000046559  | 0.001481095 | NA           | 0.005924379 |
|               |           | SPTLC2  | wilcox_HL | 208     | 6.82E-05     | 0.627593926 | NA           | 0.738345795 |
|               |           | POLR2M  | wilcox_HL | 433     | -0.999969742 | 0.107008463 | NA           | 0.194560843 |
|               |           | AKAP13  | wilcox_HL | 2061    | -1.000074449 | 4.40E-06    | NA           | 3.52E-05    |
|               |           | METTL22 | wilcox_HL | 46      | -3.999970138 | 0.032815035 | NA           | 0.0729223   |
|               |           | SBK1    | wilcox_HL | 105     | -3.34E-05    | 0.783706035 | NA           | 0.858984708 |
|               |           | MMP15   | wilcox_HL | 839     | -1.000023089 | 0.000123855 | NA           | 0.000619277 |
|               |           | ANKRD11 | wilcox_HL | 1781    | -1.000015537 | 1.29E-07    | NA           | 1.72E-06    |
|               |           | PRPSAP2 | wilcox_HL | 306     | -1.000049312 | 0.035985129 | NA           | 0.075758166 |
|               |           | KRT23   | wilcox_HL | 389     | -1.999981446 | 0.001692017 | NA           | 0.006152788 |
|               |           | SMURF2  | wilcox_HL | 310     | 1.00003021   | 0.051088052 | NA           | 0.102176104 |
|               |           | NPTX1   | wilcox_HL | 286     | -1.999935642 | 0.003316817 | NA           | 0.011056057 |
|               |           | METRNL  | wilcox_HL | 614     | -1.000020531 | 0.021626678 | NA           | 0.054066694 |
|               |           | ZBTB14  | wilcox_HL | 181     | 1.000043368  | 0.09752022  | NA           | 0.185752801 |
|               |           | PIEZO2  | wilcox_HL | 1532    | -1.000025948 | 7.41E-06    | NA           | 4.94E-05    |
|               |           | CABLES1 | wilcox_HL | 712     | -0.999970215 | 0.185053124 | NA           | 0.308421874 |
|               |           | MFSD12  | wilcox_HL | 83      | -0.999939747 | 0.595945758 | NA           | 0.738345795 |
|               |           | CBLC    | wilcox_HL | 705     | 1.999944352  | 0.0005129   | NA           | 0.002279557 |
|               |           | KCNC3   | wilcox_HL | 453     | -0.99998059  | 0.153397441 | NA           | 0.266778158 |
|               |           | KIF16B  | wilcox_HL | 1109    | -5.04E-05    | 0.454773241 | NA           | 0.586804183 |
|               |           | MEM     | 21403     | NUP210L | wilcox_HL    | 901         | -0.246969289 | 1.59E-15    |
| CACNA1S       | wilcox_HL |         |           | 3145    | -0.003079047 | 0.812005614 | NA           | 0.890499637 |
| GPR37L1       | wilcox_HL |         |           | 410     | 0.006076194  | 0.881166143 | NA           | 0.890499637 |
| EXO1          | wilcox_HL |         |           | 2592    | -0.019017099 | 0.349823965 | NA           | 0.488545473 |
| PDE11A        | wilcox_HL |         |           | 1661    | -0.128001962 | 4.58E-07    | NA           | 1.08E-06    |
| TMEM158       | wilcox_HL |         |           | 703     | -0.267034893 | 5.61E-14    | NA           | 3.74E-13    |
| ATP13A5       | wilcox_HL |         |           | 1886    | 0.02700411   | 0.238209297 | NA           | 0.352902662 |
| TREM2         | wilcox_HL |         |           | 514     | 0.264036227  | 2.65E-08    | NA           | 8.16E-08    |
| ULBP2         | wilcox_HL |         |           | 871     | 0.019951293  | 0.540544393 | NA           | 0.675680492 |
| RASA4CP       | wilcox_HL |         |           | 398     | 0.046983614  | 0.354195468 | NA           | 0.488545473 |
| GPC2          | wilcox_HL |         |           | 824     | -0.183058077 | 2.27E-08    | NA           | 7.57E-08    |
| PPP2R2D       | wilcox_HL |         |           | 997     | -0.198044096 | 8.94E-11    | NA           | 3.97E-10    |
| DEAF1         | wilcox_HL |         |           | 1711    | -0.186991329 | 8.34E-15    | NA           | 1.11E-13    |
| CREB3L1       | wilcox_HL |         |           | 1424    | -0.114007415 | 1.42E-05    | NA           | 2.98E-05    |
| ACADS         | wilcox_HL |         |           | 350     | -0.070972101 | 0.183251707 | NA           | 0.29320273  |
| CCNA1         | wilcox_HL |         |           | 220     | -0.051906749 | 0.457459075 | NA           | 0.590269775 |
| ARGLU1        | wilcox_HL |         |           | 878     | -0.30904264  | 1.64E-23    | NA           | 6.56E-22    |
| TRAV1-1       | wilcox_HL |         |           | 236     | -0.343003929 | 5.87E-09    | NA           | 2.35E-08    |
| MYH6          | wilcox_HL |         |           | 3990    | 0.044955153  | 0.009999998 | NA           | 0.016666663 |
| PSEN1         | wilcox_HL |         |           | 308     | 0.447916552  | 7.74E-11    | NA           | 3.87E-10    |
| VASH1         | wilcox_HL |         |           | 150     | 0.012984098  | 0.857889058 | NA           | 0.890499637 |
| SPTLC2        | wilcox_HL |         |           | 365     | -0.005959202 | 0.890499637 | NA           | 0.890499637 |
| POLR2M        | wilcox_HL |         |           | 704     | 0.01905459   | 0.594805436 | NA           | 0.720976286 |

|  |  |         |           |      |              |             |    |             |
|--|--|---------|-----------|------|--------------|-------------|----|-------------|
|  |  | AKAP13  | wilcox_HL | 3654 | -0.001936511 | 0.845849892 | NA | 0.890499637 |
|  |  | METTL22 | wilcox_HL | 103  | -0.126031318 | 0.220302144 | NA | 0.338926375 |
|  |  | SBK1    | wilcox_HL | 255  | 0.052975803  | 0.445463347 | NA | 0.590269775 |
|  |  | MMP15   | wilcox_HL | 1790 | -0.065035515 | 0.006679485 | NA | 0.011616495 |
|  |  | ANKRD11 | wilcox_HL | 3327 | -0.004959285 | 0.759575437 | NA | 0.868086213 |
|  |  | PRPSAP2 | wilcox_HL | 996  | -0.228949088 | 2.70E-14    | NA | 2.16E-13    |
|  |  | KRT23   | wilcox_HL | 910  | -0.100980789 | 0.001416923 | NA | 0.002576224 |
|  |  | SMURF2  | wilcox_HL | 877  | -0.185978847 | 9.65E-09    | NA | 3.51E-08    |
|  |  | NPTX1   | wilcox_HL | 460  | -0.017956171 | 0.674291873 | NA | 0.793284556 |
|  |  | METRNL  | wilcox_HL | 1395 | -0.091017223 | 0.000713154 | NA | 0.001358388 |
|  |  | ZBTB14  | wilcox_HL | 592  | -0.27503241  | 1.86E-12    | NA | 1.06E-11    |
|  |  | PIEZO2  | wilcox_HL | 3073 | -0.104016133 | 5.58E-08    | NA | 1.59E-07    |
|  |  | CABLES1 | wilcox_HL | 1621 | -0.132025191 | 2.00E-07    | NA | 5.00E-07    |
|  |  | MFSD12  | wilcox_HL | 535  | -0.301981485 | 1.39E-14    | NA | 1.39E-13    |
|  |  | CBLC    | wilcox_HL | 986  | 0.12903387   | 0.000201342 | NA | 0.000402684 |
|  |  | KCNC3   | wilcox_HL | 1091 | -0.138024099 | 4.29E-06    | NA | 9.54E-06    |
|  |  | KIF16B  | wilcox_HL | 2518 | -0.109991437 | 9.47E-08    | NA | 2.53E-07    |
|  |  | NUP210L | wilcox_HL | 586  | 0.009928835  | 0.821327672 | NA | 0.821327672 |
|  |  | CACNA1S | wilcox_HL | 2680 | 0.047997154  | 0.031351496 | NA | 0.06966999  |
|  |  | GPR37L1 | wilcox_HL | 351  | -0.03294457  | 0.573728732 | NA | 0.724886852 |
|  |  | EXO1    | wilcox_HL | 2166 | -0.005077529 | 0.819166755 | NA | 0.821327672 |
|  |  | PDE11A  | wilcox_HL | 1231 | -0.132950914 | 2.71E-05    | NA | 0.000360714 |
|  |  | TMEM158 | wilcox_HL | 474  | -0.162023388 | 0.0009458   | NA | 0.004203554 |
|  |  | ATP13A5 | wilcox_HL | 1665 | 0.120014649  | 7.15E-06    | NA | 0.000142919 |
|  |  | TREM2   | wilcox_HL | 435  | 0.329975772  | 4.21E-10    | NA | 1.69E-08    |
|  |  | ULBP2   | wilcox_HL | 782  | 0.133954903  | 0.000340996 | NA | 0.001801172 |
|  |  | RASA4CP | wilcox_HL | 364  | 0.048001395  | 0.380556262 | NA | 0.585471172 |
|  |  | GPC2    | wilcox_HL | 559  | 0.105993538  | 0.0195467   | NA | 0.048415252 |
|  |  | PPP2R2D | wilcox_HL | 667  | 0.071969698  | 0.086555709 | NA | 0.182222546 |
|  |  | DEAF1   | wilcox_HL | 1172 | -0.081018297 | 0.01114015  | NA | 0.031829    |
|  |  | CREB3L1 | wilcox_HL | 1089 | 0.025950431  | 0.434661206 | NA | 0.643942528 |
|  |  | ACADS   | wilcox_HL | 302  | -0.041020448 | 0.50097954  | NA | 0.691006262 |
|  |  | CCNA1   | wilcox_HL | 191  | 0.018047205  | 0.808589383 | NA | 0.821327672 |
|  |  | ARGLU1  | wilcox_HL | 509  | -0.169054155 | 0.000310692 | NA | 0.001801172 |
|  |  | TRAV1-1 | wilcox_HL | 99   | -0.039958848 | 0.707408467 | NA | 0.821327672 |
|  |  | MYH6    | wilcox_HL | 3434 | 0.078046832  | 9.53E-05    | NA | 0.000762514 |
|  |  | PSEN1   | wilcox_HL | 239  | 0.26299468   | 0.000360234 | NA | 0.001801172 |
|  |  | VASH1   | wilcox_HL | 130  | 0.027038615  | 0.780887191 | NA | 0.821327672 |
|  |  | SPTLC2  | wilcox_HL | 318  | 0.070035865  | 0.240694967 | NA | 0.434553695 |
|  |  | POLR2M  | wilcox_HL | 626  | 0.070027352  | 0.095249112 | NA | 0.190498225 |
|  |  | AKAP13  | wilcox_HL | 3172 | 0.084022788  | 4.08E-05    | NA | 0.000407743 |
|  |  | METTL22 | wilcox_HL | 92   | -0.040988038 | 0.704735476 | NA | 0.821327672 |
|  |  | SBK1    | wilcox_HL | 251  | -0.07601991  | 0.250156087 | NA | 0.434553695 |
|  |  | MMP15   | wilcox_HL | 1350 | 0.08503076   | 0.004484442 | NA | 0.01494814  |
|  |  | ANKRD11 | wilcox_HL | 2927 | 0.005979798  | 0.783458641 | NA | 0.821327672 |
|  |  | PRPSAP2 | wilcox_HL | 610  | 0.048951203  | 0.260732217 | NA | 0.434553695 |
|  |  | KRT23   | wilcox_HL | 729  | 0.108979631  | 0.005166241 | NA | 0.015896125 |
|  |  | SMURF2  | wilcox_HL | 576  | 0.024952817  | 0.579909482 | NA | 0.724886852 |
|  |  | NPTX1   | wilcox_HL | 413  | 0.125972867  | 0.014723388 | NA | 0.039262368 |
|  |  | METRNL  | wilcox_HL | 1122 | 0.103036337  | 0.001288011 | NA | 0.005152045 |
|  |  | ZBTB14  | wilcox_HL | 361  | -0.129940626 | 0.020576482 | NA | 0.048415252 |
|  |  | PIEZO2  | wilcox_HL | 2461 | 0.016983125  | 0.454227851 | NA | 0.64889693  |
|  |  | CABLES1 | wilcox_HL | 1276 | 0.010943748  | 0.719475025 | NA | 0.821327672 |
|  |  | MFSD12  | wilcox_HL | 299  | -0.063003567 | 0.300313998 | NA | 0.480502397 |
|  |  | CBLC    | wilcox_HL | 825  | 0.023955312  | 0.529536327 | NA | 0.706048436 |

EXF

17558

|     |       |         |           |      |              |             |    |             |
|-----|-------|---------|-----------|------|--------------|-------------|----|-------------|
|     |       | KCNC3   | wilcox_HL | 825  | 0.053956668  | 0.15846995  | NA | 0.301847525 |
|     |       | KIF16B  | wilcox_HL | 1924 | 0.077048393  | 0.002462271 | NA | 0.008953712 |
| LAN | 17485 | NUP210L | wilcox_HL | 584  | 0.0200197    | 0.60464492  | NA | 0.691022766 |
|     |       | CACNA1S | wilcox_HL | 2660 | 0.031045947  | 0.117179487 | NA | 0.234358973 |
|     |       | GPR37L1 | wilcox_HL | 351  | -0.077992633 | 0.131679048 | NA | 0.246660217 |
|     |       | EXO1    | wilcox_HL | 2168 | 0.026960665  | 0.208441077 | NA | 0.347401794 |
|     |       | PDE11A  | wilcox_HL | 1231 | -0.047957075 | 0.095622864 | NA | 0.201311293 |
|     |       | TMEM158 | wilcox_HL | 475  | -0.101020664 | 0.021834786 | NA | 0.07278262  |
|     |       | ATP13A5 | wilcox_HL | 1650 | 0.055987196  | 0.021460831 | NA | 0.07278262  |
|     |       | TREM2   | wilcox_HL | 434  | 0.254982348  | 9.85E-08    | NA | 3.94E-06    |
|     |       | ULBP2   | wilcox_HL | 779  | 0.094028232  | 0.006243516 | NA | 0.031217578 |
|     |       | RASA4CP | wilcox_HL | 363  | 0.086953717  | 0.076189941 | NA | 0.17927045  |
|     |       | GPC2    | wilcox_HL | 556  | 0.10398867   | 0.012232319 | NA | 0.048929277 |
|     |       | PPP2R2D | wilcox_HL | 666  | 0.048983135  | 0.196247016 | NA | 0.341299158 |
|     |       | DEAF1   | wilcox_HL | 1172 | -0.052938626 | 0.070627626 | NA | 0.178731773 |
|     |       | CREB3L1 | wilcox_HL | 1086 | -6.57E-05    | 0.997290748 | NA | 0.998913597 |
|     |       | ACADS   | wilcox_HL | 300  | 0.036025307  | 0.510219495 | NA | 0.618447873 |
|     |       | CCNA1   | wilcox_HL | 190  | -0.021982571 | 0.757173584 | NA | 0.818566037 |
|     |       | ARGLU1  | wilcox_HL | 509  | -0.117057561 | 0.005473272 | NA | 0.031217578 |
|     |       | TRAV1-1 | wilcox_HL | 99   | -0.09703036  | 0.322129884 | NA | 0.460185549 |
|     |       | MYH6    | wilcox_HL | 3415 | 0.051044805  | 0.004628101 | NA | 0.031217578 |
|     |       | PSEN1   | wilcox_HL | 240  | 0.22697216   | 0.000947647 | NA | 0.018952931 |
|     |       | VASH1   | wilcox_HL | 132  | 0.004019417  | 0.945180635 | NA | 0.994926985 |
|     |       | SPTLC2  | wilcox_HL | 313  | 5.61E-05     | 0.998913597 | NA | 0.998913597 |
|     |       | POLR2M  | wilcox_HL | 628  | 0.087953454  | 0.028412452 | NA | 0.087422929 |
|     |       | AKAP13  | wilcox_HL | 3161 | 0.047013087  | 0.011083668 | NA | 0.048929277 |
|     |       | METTL22 | wilcox_HL | 91   | -0.149066406 | 0.135663119 | NA | 0.246660217 |
|     |       | SBK1    | wilcox_HL | 252  | -0.119995605 | 0.054727726 | NA | 0.156364931 |
|     |       | MMP15   | wilcox_HL | 1345 | 0.083939706  | 0.002075697 | NA | 0.02767596  |
|     |       | ANKRD11 | wilcox_HL | 2912 | -0.011945794 | 0.52828879  | NA | 0.621516224 |
|     |       | PRPSAP2 | wilcox_HL | 608  | 0.032950751  | 0.401849635 | NA | 0.535799514 |
|     |       | KRT23   | wilcox_HL | 728  | 0.041048345  | 0.238866768 | NA | 0.353876694 |
|     |       | SMURF2  | wilcox_HL | 574  | 0.030010988  | 0.461060845 | NA | 0.576326056 |
|     |       | NPTX1   | wilcox_HL | 412  | 0.084027769  | 0.071492709 | NA | 0.178731773 |
|     |       | METRNL  | wilcox_HL | 1114 | 0.049015485  | 0.087088103 | NA | 0.193529117 |
|     |       | ZBTB14  | wilcox_HL | 361  | -0.141038269 | 0.005047921 | NA | 0.031217578 |
|     |       | PIEZO2  | wilcox_HL | 2458 | 0.014949219  | 0.454665802 | NA | 0.576326056 |
|     |       | CABLES1 | wilcox_HL | 1275 | 0.012972657  | 0.623417321 | NA | 0.692685912 |
|     |       | MFSD12  | wilcox_HL | 298  | -0.066011149 | 0.220644299 | NA | 0.353030878 |
|     |       | CBLC    | wilcox_HL | 825  | 0.041987774  | 0.237924906 | NA | 0.353876694 |
|     |       | KCNC3   | wilcox_HL | 821  | 0.029047463  | 0.396519303 | NA | 0.535799514 |
|     |       | KIF16B  | wilcox_HL | 1923 | 0.064001178  | 0.006006822 | NA | 0.031217578 |
|     |       | NUP210L | wilcox_HL | 74   | -0.263007925 | 0.002977495 | NA | 0.017014256 |
|     |       | CACNA1S | wilcox_HL | 476  | 5.63E-05     | 0.650328557 | NA | 0.860903425 |
|     |       | GPR37L1 | wilcox_HL | 48   | 4.89E-05     | 0.891855522 | NA | 0.906831481 |
|     |       | EXO1    | wilcox_HL | 369  | -1.74E-05    | 0.667511057 | NA | 0.860903425 |
|     |       | PDE11A  | wilcox_HL | 341  | -0.068047852 | 0.01486774  | NA | 0.05155307  |
|     |       | TMEM158 | wilcox_HL | 117  | -0.142052436 | 0.015465921 | NA | 0.05155307  |
|     |       | ATP13A5 | wilcox_HL | 240  | 3.33E-05     | 0.496892767 | NA | 0.764450411 |
|     |       | TREM2   | wilcox_HL | 62   | 0.325982594  | 0.002362167 | NA | 0.015747781 |
|     |       | ULBP2   | wilcox_HL | 98   | 4.57E-05     | 0.394043288 | NA | 0.656738814 |
|     |       | RASA4CP | wilcox_HL | 126  | -3.17E-05    | 0.227569198 | NA | 0.433465138 |
|     |       | GPC2    | wilcox_HL | 122  | -0.060948908 | 0.055161326 | NA | 0.147096868 |
|     |       | PPP2R2D | wilcox_HL | 120  | -0.27001046  | 0.000287621 | NA | 0.003834946 |
|     |       | DEAF1   | wilcox_HL | 282  | -0.113996058 | 0.002254142 | NA | 0.015747781 |

|         |           |         |           |         |              |             |              |             |    |             |
|---------|-----------|---------|-----------|---------|--------------|-------------|--------------|-------------|----|-------------|
| VSP     | 3613      | CREB3L1 | wilcox_HL | 199     | -0.028000976 | 0.026287674 | NA           | 0.080885151 |    |             |
|         |           | ACADS   | wilcox_HL | 40      | 2.14E-05     | 0.838317266 | NA           | 0.906831481 |    |             |
|         |           | CCNA1   | wilcox_HL | 36      | 4.71E-05     | 0.847193274 | NA           | 0.906831481 |    |             |
|         |           | ARGLU1  | wilcox_HL | 122     | -0.230036116 | 7.71E-05    | NA           | 0.001542064 |    |             |
|         |           | TRAV1-1 | wilcox_HL | 17      | -4.73E-05    | 0.601579766 | NA           | 0.859399666 |    |             |
|         |           | MYH6    | wilcox_HL | 475     | 4.79E-05     | 0.350366033 | NA           | 0.609332231 |    |             |
|         |           | PSEN1   | wilcox_HL | 49      | -3.95E-05    | 0.864975087 | NA           | 0.906831481 |    |             |
|         |           | VASH1   | wilcox_HL | 16      | -1.98E-05    | 0.906831481 | NA           | 0.906831481 |    |             |
|         |           | SPTLC2  | wilcox_HL | 32      | -5.92E-05    | 0.456724161 | NA           | 0.730758658 |    |             |
|         |           | POLR2M  | wilcox_HL | 132     | -0.01201884  | 0.204185261 | NA           | 0.429040228 |    |             |
|         |           | AKAP13  | wilcox_HL | 452     | 2.87E-05     | 0.597399389 | NA           | 0.859399666 |    |             |
|         |           | METTL22 | wilcox_HL | 32      | -3.83E-05    | 0.774927929 | NA           | 0.885631918 |    |             |
|         |           | SBK1    | wilcox_HL | 52      | -0.140056863 | 0.05053592  | NA           | 0.144388343 |    |             |
|         |           | MMP15   | wilcox_HL | 237     | -5.84E-05    | 0.065007361 | NA           | 0.162518403 |    |             |
|         |           | ANKRD11 | wilcox_HL | 801     | -0.053951818 | 5.92E-05    | NA           | 0.001542064 |    |             |
|         |           | PRPSAP2 | wilcox_HL | 70      | -0.208042153 | 0.008773937 | NA           | 0.038995276 |    |             |
|         |           | KRT23   | wilcox_HL | 70      | 0.012012478  | 0.285206396 | NA           | 0.518557084 |    |             |
|         |           | SMURF2  | wilcox_HL | 64      | 2.56E-05     | 0.671973792 | NA           | 0.860903425 |    |             |
|         |           | NPTX1   | wilcox_HL | 59      | -4.98E-05    | 0.772580452 | NA           | 0.885631918 |    |             |
|         |           | METRNL  | wilcox_HL | 142     | 6.27E-06     | 0.767461468 | NA           | 0.885631918 |    |             |
|         |           | ZBTB14  | wilcox_HL | 79      | -0.012017842 | 0.214520114 | NA           | 0.429040228 |    |             |
|         |           | PIEZO2  | wilcox_HL | 428     | -0.022928957 | 0.01413727  | NA           | 0.05155307  |    |             |
|         |           | CABLES1 | wilcox_HL | 197     | -7.23E-05    | 0.148672321 | NA           | 0.330382936 |    |             |
|         |           | MFSD12  | wilcox_HL | 88      | -0.251035697 | 0.000796009 | NA           | 0.007960089 |    |             |
|         |           | CBLC    | wilcox_HL | 192     | 0.169032571  | 0.00365176  | NA           | 0.018258802 |    |             |
|         |           | KCNC3   | wilcox_HL | 150     | -0.036933043 | 0.08433183  | NA           | 0.198427836 |    |             |
|         |           | KIF16B  | wilcox_HL | 272     | -8.92E-06    | 0.68872274  | NA           | 0.860903425 |    |             |
|         |           | AB42    | 2235      | NUP210L | wilcox_HL    | 35          | -0.17113301  | 0.322488978 | NA | 0.725284641 |
|         |           |         |           | CACNA1S | wilcox_HL    | 325         | -0.027907602 | 0.655572896 | NA | 0.866605958 |
|         |           |         |           | GPR37L1 | wilcox_HL    | 35          | 0.135443511  | 0.454346692 | NA | 0.78949196  |
|         |           |         |           | EXO1    | wilcox_HL    | 267         | 0.025986676  | 0.70413791  | NA | 0.866605958 |
|         |           |         |           | PDE11A  | wilcox_HL    | 149         | 0.128009212  | 0.160266769 | NA | 0.58278825  |
|         |           |         |           | TMEM158 | wilcox_HL    | 45          | 0.407023717  | 0.010290276 | NA | 0.137203681 |
| ATP13A5 | wilcox_HL |         |           | 156     | -0.111961037 | 0.221760187 | NA           | 0.684033762 |    |             |
| TREM2   | wilcox_HL |         |           | 47      | 0.271501873  | 0.071656007 | NA           | 0.434826153 |    |             |
| ULBP2   | wilcox_HL |         |           | 67      | -0.027465464 | 0.823558518 | NA           | 0.909364424 |    |             |
| RASA4CP | wilcox_HL |         |           | 91      | -0.177175074 | 0.117371849 | NA           | 0.480458184 |    |             |
| GPC2    | wilcox_HL |         |           | 38      | -0.180176576 | 0.314145886 | NA           | 0.725284641 |    |             |
| PPP2R2D | wilcox_HL |         |           | 61      | 0.248939391  | 0.076094577 | NA           | 0.434826153 |    |             |
| DEAF1   | wilcox_HL |         |           | 102     | 0.06071105   | 0.574254038 | NA           | 0.820362911 |    |             |
| CREB3L1 | wilcox_HL |         |           | 105     | -0.025335275 | 0.802152336 | NA           | 0.909364424 |    |             |
| ACADS   | wilcox_HL |         |           | 25      | 0.361429271  | 0.113147975 | NA           | 0.480458184 |    |             |
| CCNA1   | wilcox_HL |         |           | 30      | 0.122670079  | 0.527356802 | NA           | 0.820362911 |    |             |
| ARGLU1  | wilcox_HL |         |           | 37      | -0.27588515  | 0.120114546 | NA           | 0.480458184 |    |             |
| TRAV1-1 | wilcox_HL |         |           | 11      | 0.290218804  | 0.375655764 | NA           | 0.725284641 |    |             |
| MYH6    | wilcox_HL |         |           | 336     | 0.077618934  | 0.222310973 | NA           | 0.684033762 |    |             |
| PSEN1   | wilcox_HL |         |           | 25      | 0.036093567  | 0.863896203 | NA           | 0.909364424 |    |             |
| VASH1   | wilcox_HL |         |           | 13      | -0.299871892 | 0.281217785 | NA           | 0.725284641 |    |             |
| SPTLC2  | wilcox_HL |         |           | 24      | -0.118661934 | 0.566271284 | NA           | 0.820362911 |    |             |
| POLR2M  | wilcox_HL |         |           | 66      | -0.010741884 | 0.936957406 | NA           | 0.960981955 |    |             |
| AKAP13  | wilcox_HL |         |           | 294     | -0.02468347  | 0.714949915 | NA           | 0.866605958 |    |             |
| METTL22 | wilcox_HL |         |           | 24      | -0.431599859 | 0.05738893  | NA           | 0.434826153 |    |             |
| SBK1    | wilcox_HL |         |           | 36      | -0.141789936 | 0.4476302   | NA           | 0.78949196  |    |             |
| MMP15   | wilcox_HL |         |           | 110     | 0.072933034  | 0.473695176 | NA           | 0.78949196  |    |             |
| ANKRD11 | wilcox_HL |         |           | 553     | -0.154534003 | 0.003051643 | NA           | 0.061032864 |    |             |

|  |  |         |           |      |              |             |             |             |
|--|--|---------|-----------|------|--------------|-------------|-------------|-------------|
|  |  | PRPSAP2 | wilcox_HL | 43   | -0.172837238 | 0.304472589 | NA          | 0.725284641 |
|  |  | KRT23   | wilcox_HL | 50   | -0.136448448 | 0.380774437 | NA          | 0.725284641 |
|  |  | SMURF2  | wilcox_HL | 44   | 0.036065212  | 0.833951641 | NA          | 0.909364424 |
|  |  | NPTX1   | wilcox_HL | 29   | -0.170230282 | 0.379374504 | NA          | 0.725284641 |
|  |  | METRNL  | wilcox_HL | 89   | 0.047441751  | 0.679273748 | NA          | 0.866605958 |
|  |  | ZBTB14  | wilcox_HL | 40   | 0.328839684  | 0.052992652 | NA          | 0.434826153 |
|  |  | PIEZO2  | wilcox_HL | 207  | -4.42E-05    | 0.978937318 | NA          | 0.978937318 |
|  |  | CABLES1 | wilcox_HL | 108  | -0.054541994 | 0.596322794 | NA          | 0.822514198 |
|  |  | MFSD12  | wilcox_HL | 23   | 0.129277012  | 0.550533973 | NA          | 0.820362911 |
|  |  | CBLC    | wilcox_HL | 110  | 0.400161645  | 0.000153296 | NA          | 0.006131857 |
|  |  | KCNC3   | wilcox_HL | 61   | 0.026095573  | 0.854826696 | NA          | 0.909364424 |
|  |  | KIF16B  | wilcox_HL | 161  | 0.081971448  | 0.329698328 | NA          | 0.725284641 |
|  |  | NUP210L | fisher    | 1250 | -0.487596171 | 2.23E-13    | 0.614100815 | 1.49E-12    |
|  |  | CACNA1S | fisher    | 5461 | -0.045104657 | 0.156811567 | 0.955897435 | 0.190074627 |
|  |  | GPR37L1 | fisher    | 700  | 0.045170875  | 0.593396478 | 1.046206615 | 0.641509706 |
|  |  | EXO1    | fisher    | 4752 | -0.107703262 | 0.001436617 | 0.897893996 | 0.002128322 |
|  |  | PDE11A  | fisher    | 3029 | -0.146541427 | 0.000420162 | 0.863689951 | 0.000730716 |
|  |  | TMEM158 | fisher    | 954  | -0.554517925 | 4.70E-13    | 0.574349074 | 2.12E-12    |
|  |  | ATP13A5 | fisher    | 3488 | 0.047213626  | 0.213974436 | 1.04834594  | 0.25173463  |
|  |  | TREM2   | fisher    | 1040 | 0.228667412  | 0.000549232 | 1.256923932 | 0.000915387 |
|  |  | ULBP2   | fisher    | 1701 | -0.126029678 | 0.021612391 | 0.881588682 | 0.028816522 |
|  |  | RASA4CP | fisher    | 689  | -0.153714409 | 0.075026253 | 0.857516885 | 0.093782817 |
|  |  | GPC2    | fisher    | 1106 | -0.422595215 | 1.65E-09    | 0.655343852 | 5.06E-09    |
|  |  | PPP2R2D | fisher    | 1386 | -0.490271301 | 9.40E-15    | 0.61246021  | 7.52E-14    |
|  |  | DEAF1   | fisher    | 2634 | -0.260677307 | 7.10E-09    | 0.770529524 | 1.78E-08    |
|  |  | CREB3L1 | fisher    | 2219 | -0.248540108 | 3.56E-07    | 0.779938578 | 7.49E-07    |
|  |  | ACADS   | fisher    | 874  | 0.285462512  | 6.76E-05    | 1.330377202 | 0.000128777 |
|  |  | CCNA1   | fisher    | 457  | -0.36242895  | 0.000806157 | 0.695983762 | 0.001289852 |
|  |  | ARGLU1  | fisher    | 991  | -0.828261889 | 8.76E-26    | 0.436807848 | 3.50E-24    |
|  |  | TRAV1-1 | fisher    | 243  | -1.225876029 | 1.61E-12    | 0.293500473 | 5.84E-12    |
|  |  | MYH6    | fisher    | 7523 | 0.060102568  | 0.029732844 | 1.061945463 | 0.038364959 |
|  |  | PSEN1   | fisher    | 549  | 0.63885101   | 3.29E-13    | 1.894303094 | 1.88E-12    |
|  |  | VASH1   | fisher    | 284  | -0.055839165 | 0.70065382  | 0.945691224 | 0.737530336 |
|  |  | SPTLC2  | fisher    | 669  | 0.003538033  | 0.966515593 | 1.003544299 | 0.966515593 |
|  |  | POLR2M  | fisher    | 1441 | -0.048572202 | 0.418239825 | 0.952588558 | 0.477988371 |
|  |  | AKAP13  | fisher    | 7027 | -0.093993492 | 0.001080062 | 0.910288687 | 0.001661633 |
|  |  | METTL22 | fisher    | 202  | -0.416790224 | 0.012012397 | 0.659159181 | 0.016568824 |
|  |  | SBK1    | fisher    | 187  | 1.075111895  | 5.30E-13    | 2.930320772 | 2.12E-12    |
|  |  | MMP15   | fisher    | 2995 | -0.150410708 | 0.000334585 | 0.860354549 | 0.000608337 |
|  |  | ANKRD11 | fisher    | 5728 | 0.00637898   | 0.841085098 | 1.006399369 | 0.862651383 |
|  |  | PRPSAP2 | fisher    | 1387 | -0.495541019 | 4.75E-15    | 0.609241207 | 4.75E-14    |
|  |  | KRT23   | fisher    | 1544 | -0.311293766 | 1.03E-07    | 0.732498661 | 2.41E-07    |
|  |  | SMURF2  | fisher    | 1247 | -0.315923479 | 1.10E-06    | 0.729115241 | 2.20E-06    |
|  |  | NPTX1   | fisher    | 948  | -0.04185475  | 0.57114742  | 0.959009066 | 0.634608245 |
|  |  | METRNL  | fisher    | 2215 | -0.147997781 | 0.002178675 | 0.862433029 | 0.003112393 |
|  |  | ZBTB14  | fisher    | 892  | -0.573979857 | 5.19E-13    | 0.563279201 | 2.12E-12    |
|  |  | PIEZO2  | fisher    | 5526 | -0.185859422 | 5.69E-09    | 0.830390322 | 1.52E-08    |
|  |  | CABLES1 | fisher    | 2742 | -0.262584338 | 2.88E-09    | 0.769061501 | 8.23E-09    |
|  |  | MFSD12  | fisher    | 584  | -0.962450912 | 6.21E-20    | 0.381955598 | 1.24E-18    |
|  |  | CBLC    | fisher    | 1784 | 0.400752515  | 1.72E-15    | 1.492947741 | 2.30E-14    |
|  |  | KCNC3   | fisher    | 1796 | -0.282807651 | 1.88E-07    | 0.75366474  | 4.17E-07    |
|  |  | KIF16B  | fisher    | 4173 | -0.231408836 | 1.79E-10    | 0.793415023 | 5.97E-10    |
|  |  | NUP210L | fisher    | 34   | -0.178602297 | 0.685608092 | 0.836438487 | 0.931271893 |
|  |  | CACNA1S | fisher    | 462  | -0.410693762 | 0.051061236 | 0.663189994 | 0.393176563 |
|  |  | GPR37L1 | fisher    | 37   | 0.638690635  | 1           | 1.893999318 | 1           |

AD

38386

CVD\_S

3758

|         |        |     |              |             |             |             |
|---------|--------|-----|--------------|-------------|-------------|-------------|
| EXO1    | fisher | 433 | -0.406743088 | 0.058976484 | 0.665815224 | 0.393176563 |
| PDE11A  | fisher | 245 | 0.336066637  | 0.445567356 | 1.399432276 | 0.810122465 |
| TMEM158 | fisher | 32  | -1.281996837 | 0.019470138 | 0.277482659 | 0.332795608 |
| ATP13A5 | fisher | 269 | 0.219850429  | 0.56251219  | 1.245890368 | 0.896034171 |
| TREM2   | fisher | 99  | -0.535801401 | 0.155277659 | 0.585200122 | 0.621110636 |
| ULBP2   | fisher | 97  | -0.408077891 | 0.336369675 | 0.664927085 | 0.810122465 |
| RASA4CP | fisher | 46  | -1.073254922 | 0.024959671 | 0.341893867 | 0.332795608 |
| GPC2    | fisher | 55  | -0.411054871 | 0.351077795 | 0.662950554 | 0.810122465 |
| PPP2R2D | fisher | 61  | 1.156244146  | 0.369044458 | 3.177974823 | 0.810122465 |
| DEAF1   | fisher | 213 | 0.064682543  | 1           | 1.066820301 | 1           |
| CREB3L1 | fisher | 154 | -0.404162448 | 0.187960981 | 0.667535673 | 0.683494476 |
| ACADS   | fisher | 39  | Inf          | 0.261694557 | Inf         | 0.810122465 |
| CCNA1   | fisher | 38  | -0.821179295 | 0.117842905 | 0.439912562 | 0.556663844 |
| ARGLU1  | fisher | 37  | -1.110803606 | 0.034531136 | 0.329294232 | 0.345311365 |
| TRAV1-1 | fisher | 14  | Inf          | 1           | Inf         | 1           |
| MYH6    | fisher | 596 | -0.055665039 | 0.758472104 | 0.945855907 | 0.931271893 |
| PSEN1   | fisher | 60  | 0.423350696  | 0.768299312 | 1.52706974  | 0.931271893 |
| VASH1   | fisher | 19  | -0.059440495 | 1           | 0.942291603 | 1           |
| SPTLC2  | fisher | 40  | 0.719573788  | 0.720839973 | 2.053557773 | 0.931271893 |
| POLR2M  | fisher | 98  | -0.396745156 | 0.339097988 | 0.672505388 | 0.810122465 |
| AKAP13  | fisher | 469 | -0.033734614 | 0.909509692 | 0.966828054 | 1           |
| METTL22 | fisher | 11  | -0.649253928 | 0.430058428 | 0.522435406 | 0.810122465 |
| SBK1    | fisher | 35  | Inf          | 0.417728388 | Inf         | 0.810122465 |
| MMP15   | fisher | 170 | -0.293467813 | 0.363642384 | 0.745673223 | 0.810122465 |
| ANKRD11 | fisher | 392 | 0.030816701  | 1           | 1.031296451 | 1           |
| PRPSAP2 | fisher | 57  | -0.06006645  | 0.760591579 | 0.941701956 | 0.931271893 |
| KRT23   | fisher | 58  | -0.353067283 | 0.533070256 | 0.702529923 | 0.888450426 |
| SMURF2  | fisher | 69  | -0.408922002 | 0.392041616 | 0.66436605  | 0.810122465 |
| NPTX1   | fisher | 44  | -0.33904236  | 0.480389095 | 0.712452269 | 0.835459295 |
| METRNL  | fisher | 154 | -0.504147978 | 0.125249365 | 0.604019994 | 0.556663844 |
| ZBTB14  | fisher | 25  | Inf          | 0.633626856 | Inf         | 0.931271893 |
| PIEZO2  | fisher | 354 | -0.692046046 | 0.001786263 | 0.500550871 | 0.071450502 |
| CABLES1 | fisher | 182 | 0.447029057  | 0.380649684 | 1.563659734 | 0.810122465 |
| MFSD12  | fisher | 19  | Inf          | 1           | Inf         | 1           |
| CBLC    | fisher | 167 | 0.353632504  | 0.582422211 | 1.42423169  | 0.896034171 |
| KCNC3   | fisher | 110 | 0.336107565  | 0.658591794 | 1.399489553 | 0.931271893 |
| KIF16B  | fisher | 265 | 0.694254693  | 0.077494154 | 2.002216251 | 0.442823736 |
| NUP210L | fisher | 32  | 0.387214422  | 0.396611788 | 1.472872274 | 1           |
| CACNA1S | fisher | 433 | -0.1527169   | 0.416440062 | 0.858372693 | 1           |
| GPR37L1 | fisher | 36  | 0.465719605  | 0.285707602 | 1.593160223 | 0.952358674 |
| EXO1    | fisher | 409 | 0.212678934  | 0.182424441 | 1.236987433 | 0.952358674 |
| PDE11A  | fisher | 234 | -0.01038459  | 1           | 0.989669144 | 1           |
| TMEM158 | fisher | 28  | -0.050912891 | 1           | 0.950361452 | 1           |
| ATP13A5 | fisher | 254 | -0.155511502 | 0.5362029   | 0.855977231 | 1           |
| TREM2   | fisher | 97  | -0.495178983 | 0.253435973 | 0.609461814 | 0.952358674 |
| ULBP2   | fisher | 87  | 0.140438791  | 0.607622781 | 1.150778639 | 1           |
| RASA4CP | fisher | 42  | -0.499944175 | 0.620113223 | 0.60656452  | 1           |
| GPC2    | fisher | 53  | 0.011511957  | 1           | 1.011578474 | 1           |
| PPP2R2D | fisher | 61  | 0.027120967  | 0.839623564 | 1.027492088 | 1           |
| DEAF1   | fisher | 209 | -0.514837095 | 0.055191035 | 0.597597938 | 0.952358674 |
| CREB3L1 | fisher | 147 | -0.109329787 | 0.790005321 | 0.896434736 | 1           |
| ACADS   | fisher | 37  | -0.040889633 | 1           | 0.959935069 | 1           |
| CCNA1   | fisher | 38  | 0.184711311  | 0.608749609 | 1.202871134 | 1           |
| ARGLU1  | fisher | 33  | 0.350543441  | 0.40941759  | 1.419838938 | 1           |
| TRAV1-1 | fisher | 13  | 0.36639223   | 0.649719895 | 1.442520931 | 1           |

|        |        |         |             |             |              |             |             |             |
|--------|--------|---------|-------------|-------------|--------------|-------------|-------------|-------------|
| HS_S   | 3578   | MYH6    | fisher      | 555         | -0.025916552 | 0.94163814  | 0.9744164   | 1           |
|        |        | PSEN1   | fisher      | 58          | -0.295324537 | 0.67605697  | 0.744289998 | 1           |
|        |        | VASH1   | fisher      | 18          | #NAME?       | 0.251417675 | 0           | 0.952358674 |
|        |        | SPTLC2  | fisher      | 37          | -0.361178851 | 0.792763637 | 0.696854354 | 1           |
|        |        | POLR2M  | fisher      | 92          | 0.447411052  | 0.129664889 | 1.564257159 | 0.952358674 |
|        |        | AKAP13  | fisher      | 450         | 0.183399657  | 0.23065253  | 1.201294417 | 0.952358674 |
|        |        | METTL22 | fisher      | 9           | 0.819429951  | 0.2671438   | 2.26920591  | 0.952358674 |
|        |        | SBK1    | fisher      | 35          | -0.29993142  | 0.79161522  | 0.740869028 | 1           |
|        |        | MMP15   | fisher      | 158         | 0.019316298  | 0.89758023  | 1.019504065 | 1           |
|        |        | ANKRD11 | fisher      | 373         | -0.1848522   | 0.340885496 | 0.83122713  | 1           |
|        |        | PRPSAP2 | fisher      | 56          | 0.554151757  | 0.130597284 | 1.740464022 | 0.952358674 |
|        |        | KRT23   | fisher      | 52          | 0.212258888  | 0.5131383   | 1.23646795  | 1           |
|        |        | SMURF2  | fisher      | 67          | 0.452149472  | 0.171021146 | 1.571686854 | 0.952358674 |
|        |        | NPTX1   | fisher      | 41          | 0.096742149  | 0.802557663 | 1.101576295 | 1           |
|        |        | METRNL  | fisher      | 143         | -0.077241009 | 0.892563614 | 0.925666733 | 1           |
|        |        | ZBTB14  | fisher      | 25          | -0.374790588 | 1           | 0.687433221 | 1           |
|        |        | PIEZO2  | fisher      | 332         | -0.22241118  | 0.274293798 | 0.800586111 | 0.952358674 |
|        |        | CABLES1 | fisher      | 174         | 0.088250545  | 0.711364766 | 1.092261748 | 1           |
|        |        | MFSD12  | fisher      | 18          | -0.766191859 | 0.712382142 | 0.464779649 | 1           |
|        |        | CBLC    | fisher      | 157         | 0.477395921  | 0.037519508 | 1.611871491 | 0.952358674 |
| KCNC3  | fisher | 106     | 0.105266577 | 0.753768513 | 1.11100674   | 1           |             |             |
| KIF16B | fisher | 255     | 0.09941532  | 0.606670073 | 1.10E+00     | 1           |             |             |
| TDP43  | 1799   | NUP210L | fisher      | 15          | 0.33188753   | 0.597370509 | 1.39E+00    | 0.91168127  |
|        |        | CACNA1S | fisher      | 196         | -0.041677853 | 0.816016693 | 0.959178728 | 0.967265616 |
|        |        | GPR37L1 | fisher      | 18          | -1.15548038  | 0.085407552 | 0.314906226 | 0.689140937 |
|        |        | EXO1    | fisher      | 197         | -0.00255196  | 1           | 0.997451293 | 1           |
|        |        | PDE11A  | fisher      | 123         | -0.131282666 | 0.565048105 | 0.876969849 | 0.91168127  |
|        |        | TMEM158 | fisher      | 11          | -1.846950959 | 0.059499495 | 0.157717321 | 0.689140937 |
|        |        | ATP13A5 | fisher      | 123         | 0.26930778   | 0.151627266 | 1.309057981 | 0.689140937 |
|        |        | TREM2   | fisher      | 35          | -0.06452876  | 1           | 0.937509151 | 1           |
|        |        | ULBP2   | fisher      | 29          | -0.030163102 | 1           | 0.970287264 | 1           |
|        |        | RASA4CP | fisher      | 12          | -0.231722497 | 0.775877153 | 0.793166199 | 0.967265616 |
|        |        | GPC2    | fisher      | 25          | -0.487739794 | 0.307751928 | 0.614012622 | 0.815469625 |
|        |        | PPP2R2D | fisher      | 36          | -0.647225635 | 0.118580225 | 0.523496133 | 0.689140937 |
|        |        | DEAF1   | fisher      | 92          | -0.382288851 | 0.100461683 | 0.682297942 | 0.689140937 |
|        |        | CREB3L1 | fisher      | 72          | 0.011245448  | 1           | 1.011308915 | 1           |
|        |        | ACADS   | fisher      | 17          | 0.34816629   | 0.465729912 | 1.416467774 | 0.846781659 |
|        |        | CCNA1   | fisher      | 9           | 0.689138915  | 0.319903225 | 1.991999513 | 0.815469625 |
|        |        | ARGLU1  | fisher      | 16          | -0.328292519 | 0.615384857 | 0.72015233  | 0.91168127  |
|        |        | TRAV1-1 | fisher      | 4           | 0.46354969   | 0.642648412 | 1.589706948 | 0.91806916  |
|        |        | MYH6    | fisher      | 264         | -0.094165831 | 0.538107891 | 0.910131822 | 0.91168127  |
|        |        | PSEN1   | fisher      | 22          | -0.768908292 | 0.184749984 | 0.463518819 | 0.738999934 |
|        |        | VASH1   | fisher      | 8           | 0.977549114  | 0.27357306  | 2.65793396  | 0.815469625 |
|        |        | SPTLC2  | fisher      | 22          | 0.653068528  | 0.12900735  | 1.921427748 | 0.689140937 |
|        |        | POLR2M  | fisher      | 33          | -0.376486587 | 0.370417608 | 0.686268323 | 0.815469625 |
|        |        | AKAP13  | fisher      | 184         | 0.099106098  | 0.576030938 | 1.104183445 | 0.91168127  |
|        |        | METTL22 | fisher      | 1           | Inf          | 0.386325737 | Inf         | 0.815469625 |
|        |        | SBK1    | fisher      | 14          | -0.841776389 | 0.271270435 | 0.430944318 | 0.815469625 |
|        |        | MMP15   | fisher      | 79          | 0.190907555  | 0.410735534 | 1.210347556 | 0.815469625 |
|        |        | ANKRD11 | fisher      | 174         | 0.074065692  | 0.682285406 | 1.076877546 | 0.941083318 |
|        |        | PRPSAP2 | fisher      | 23          | -0.167803559 | 0.830630003 | 0.845519913 | 0.967265616 |
|        |        | KRT23   | fisher      | 19          | -0.076987434 | 1           | 0.925901488 | 1           |
|        |        | SMURF2  | fisher      | 24          | -0.429689328 | 0.40290655  | 0.650711221 | 0.815469625 |
|        |        | NPTX1   | fisher      | 12          | -0.231722497 | 0.775877153 | 0.793166199 | 0.967265616 |
| METRNL | fisher | 72      | 0.071732265 | 0.805296905 | 1.07436766   | 0.967265616 |             |             |

|         |        |     |              |             |             |             |
|---------|--------|-----|--------------|-------------|-------------|-------------|
| ZBTB14  | fisher | 12  | -1.152346143 | 0.144346132 | 0.315894765 | 0.689140937 |
| PIEZO2  | fisher | 167 | -0.155939647 | 0.404153056 | 0.855610828 | 0.815469625 |
| CABLES1 | fisher | 78  | -0.362960179 | 0.155056711 | 0.695614133 | 0.689140937 |
| MFSD12  | fisher | 10  | -0.927457737 | 0.333263779 | 0.395558046 | 0.815469625 |
| CBLC    | fisher | 62  | 0.210549158  | 0.428121553 | 1.23435573  | 0.815469625 |
| KCNC3   | fisher | 53  | 0.672301151  | 0.021055225 | 1.958739493 | 0.689140937 |
| KIF16B  | fisher | 120 | -0.051433315 | 0.846357414 | 0.94986699  | 0.967265616 |

**Table S5 Replications in UKB and ADGC**

| Gene    | ADSP R5 |        |          | UKB  |          |          | ADGC |        |          |
|---------|---------|--------|----------|------|----------|----------|------|--------|----------|
|         | Mask    | Test   | P        | Mask | Test     | P        | Mask | Test   | P        |
| ACADS   | M2      | ACAT-V | 2.74E-18 | M2   | Burden   | 1.02E-02 | M1   | ACAT-O | 2.30E-02 |
|         |         | ACAT-O | 2.46E-17 |      |          |          |      | ACAT-V | 2.30E-02 |
|         |         | SKAT   | 2.27E-13 |      |          |          |      | SKAT   | 2.30E-02 |
|         |         | SKAT-O | 1.70E-12 |      |          |          |      | SKAT-O | 2.30E-02 |
|         |         |        |          |      |          |          |      | Burden | 2.30E-02 |
|         |         |        | M2       | SKAT | 4.66E-02 |          |      |        |          |
| TREM2   | M2      | ACAT-O | 1.19E-07 | M2   | SKAT     | 7.05E-11 | M2   | SKATO  | 6.50E-09 |
|         |         | SKAT-O | 1.44E-07 |      | ACATO    | 1.11E-10 |      | ACATO  | 6.77E-09 |
|         |         | Burden | 1.62E-07 |      | SKATO    | 2.05E-10 |      | SKAT   | 1.18E-08 |
|         |         | SKAT   | 4.40E-07 |      | Burden   | 8.16E-10 |      | ACATV  | 3.12E-08 |
|         |         |        |          |      | ACATV    | 1.77E-09 |      | Burden | 6.49E-08 |
| CBLC    | M3      | SKAT   | 7.57E-07 | M1   | SKAT     | 2.01E-02 | M2   | Burden | 3.91E-03 |
|         |         | ACAT-O | 1.19E-06 |      | ACATV    | 2.14E-02 |      | ACAT-O | 5.89E-03 |
|         |         |        |          |      | ACATO    | 2.39E-02 |      | SKAT-O | 6.17E-03 |
|         |         |        |          |      | SKATO    | 2.48E-02 |      | ACAT-V | 7.57E-03 |
|         |         |        |          |      | Burden   | 4.28E-02 |      | SKAT   | 1.20E-02 |
| CREB3L1 | M2      | ACAT-V | 1.13E-06 | M3   | SKAT-O   | 4.38E-02 | M3   | ACATO  | 1.18E-02 |
|         |         |        |          |      |          |          |      | ACATV  | 1.18E-02 |
|         |         |        |          |      |          |          |      | SKAT   | 1.18E-02 |
|         |         |        |          |      |          |          |      | SKATO  | 1.18E-02 |
|         |         |        |          |      |          |          |      | Burden | 1.18E-02 |
| MFSD12  | M1      | SKAT-O | 8.75E-11 | M2   | Burden   | 3.03E-02 | M1   | ACAT-V | 3.68E-02 |
|         |         | ACAT-V | 3.07E-10 |      |          |          |      |        |          |
|         |         | Burden | 3.97E-10 |      |          |          |      |        |          |
|         |         | ACAT-O | 1.46E-10 |      |          |          |      |        |          |
|         |         | SKAT   | 1.65E-10 |      |          |          |      |        |          |
| NUP210L | M3      | SKAT-O | 9.15E-10 | M3   | Burden   | 3.51E-02 |      |        |          |
|         |         | SKAT   | 1.10E-09 |      |          |          |      |        |          |
|         |         | ACAT-O | 1.58E-09 |      |          |          |      |        |          |
|         |         | ACAT-V | 4.21E-08 |      |          |          |      |        |          |
|         |         | Burden | 6.86E-07 |      |          |          |      |        |          |
| GPR37L1 | M2      | Burden | 5.98E-07 | M3   | ACAT-V   | 7.00E-04 |      |        |          |
|         |         | SKAT-O | 6.37E-07 |      | ACAT-O   | 5.09E-03 |      |        |          |
|         |         | ACAT-O | 9.32E-07 |      | Burden   | 1.26E-02 |      |        |          |
|         |         | ACAT-V | 1.07E-06 |      | SKAT-O   | 1.60E-02 |      |        |          |
|         |         | SKAT   | 1.13E-06 |      | SKAT     | 3.50E-02 |      |        |          |
| MYH6    | M2      | SKAT   | 2.70E-07 | M1   | Burden   | 3.07E-02 |      |        |          |
|         |         | SKAT-O | 8.79E-07 |      |          |          |      |        |          |
|         |         | ACAT-O | 1.07E-06 |      |          |          |      |        |          |
|         | M3      | SKAT-O | 2.11E-08 |      |          |          |      |        |          |
|         |         | ACAT-O | 5.46E-08 |      |          |          |      |        |          |
|         |         | SKAT   | 6.29E-08 |      |          |          |      |        |          |
|         |         | ACAT-V | 1.73E-07 |      |          |          |      |        |          |
| CARIES1 | M2      | ACAT-V | 5.05E-07 | M2   | SKAT-O   | 4.94E-02 |      |        |          |

|         |    |        |          |    |        |          |          |
|---------|----|--------|----------|----|--------|----------|----------|
| CABLE31 | M2 | ACAT-V | 3.05E-07 | M3 | Burden | 3.05E-02 |          |
| METTL22 | M3 | ACAT-V | 1.50E-06 | M2 | Burden | 1.83E-02 |          |
| NPTX1   | M2 | ACAT-V | 6.96E-08 | M3 | Burden | 2.76E-02 |          |
|         |    | ACAT-O | 6.27E-07 |    |        |          |          |
| METRNL  | M2 | ACAT-V | 8.62E-13 | M3 | Burden | 3.95E-03 |          |
|         |    | ACAT-O | 7.76E-12 |    |        |          |          |
|         |    | SKAT   | 1.01E-07 |    |        |          |          |
|         |    | SKAT-O | 2.06E-07 |    |        |          |          |
| ZBTB14  | M3 | ACATO  | 9.57E-08 | M2 | ACAT-O | 3.92E-02 |          |
|         |    | ACATV  | 1.30E-07 |    | ACAT-V | 5.71E-03 |          |
|         |    | SKAT   | 7.62E-08 |    |        |          |          |
|         |    | SKATO  | 7.53E-08 |    |        |          |          |
| PIEZO2  | M2 | ACAT-V | 2.44E-09 | M2 | SKAT   | 4.45E-03 |          |
|         |    | ACAT-O | 2.19E-08 |    | ACAT-V | 8.22E-03 |          |
|         |    |        |          |    | SKAT-O | 8.40E-03 |          |
|         |    |        |          |    | ACAT-O | 8.85E-03 |          |
| PSEN1   | M2 | ACAT-V | 4.96E-13 | M2 | SKAT   | 1.03E-02 |          |
|         |    | ACAT-O | 4.47E-12 |    | ACATO  | 1.28E-02 |          |
|         |    | SKAT-O | 7.38E-07 |    | SKATO  | 1.59E-02 |          |
|         |    | SKAT   | 7.70E-07 |    | ACATV  | 2.57E-02 |          |
|         |    |        |          |    | Burden | 3.15E-02 |          |
| SMURF2  | M2 | ACAT-V | 3.78E-08 |    | M2     | ACATO    | 1.55E-02 |
|         |    | ACAT-O | 3.36E-07 |    |        | ACATV    | 4.87E-02 |
|         |    |        |          |    |        | SKAT     | 2.44E-02 |
| ATP13A5 | M2 | ACAT-V | 2.10E-07 |    | M3     | ACAT-O   | 2.60E-02 |
|         |    |        |          |    |        | ACAT-V   | 2.67E-02 |
|         |    |        |          |    |        | SKAT     | 1.72E-02 |
|         |    |        |          |    |        | SKAT-O   | 2.69E-02 |
| GPC2    | M2 | ACAT-O | 4.59E-09 |    | M3     | Burden   | 2.82E-02 |
|         |    | ACAT-V | 4.27E-09 |    |        |          |          |
|         |    | SKAT   | 2.09E-09 |    |        |          |          |
|         |    | SKAT-O | 4.62E-09 |    |        |          |          |
| VASH1   | M2 | ACAT-O | 9.65E-07 |    | M3     | ACAT-O   | 3.12E-02 |
|         |    | ACAT-V | 1.07E-07 |    |        | SKAT     | 4.67E-02 |
|         |    |        |          |    |        | SKAT-O   | 2.29E-02 |
|         |    |        |          |    |        | Burden   | 1.43E-02 |
| AKAP13  | M2 | ACAT-V | 6.92E-07 |    | M2     | Burden   | 8.53E-03 |
| KIF16B  | M2 | ACAT-O | 3.18E-17 |    | M1     | ACATO    | 1.35E-02 |
|         |    | ACAT-V | 1.72E-15 |    |        | ACATV    | 3.51E-02 |
|         |    | SKAT   | 1.05E-17 |    |        | SKAT     | 2.16E-02 |
|         |    | SKAT-O | 5.16E-17 |    |        | SKATO    | 7.18E-03 |
|         |    |        |          |    |        | Burden   | 5.48E-03 |

| Table S6 Ancestry concentration analysis |      |           |                     |     |     |                |                   |                        |                   |                        |               |
|------------------------------------------|------|-----------|---------------------|-----|-----|----------------|-------------------|------------------------|-------------------|------------------------|---------------|
| Gene                                     | CHR  | POS       | ID                  | REF | ALT | total_carriers | total_carriers_AD | total_carriers_Control | dominant_ancestry | dominant_ancestry_prop | Simpson_index |
| NUP210L                                  | chr1 | 154001074 | rs756544991         | T   | TA  | 2              | 0                 | 2                      | South Asian       | 1                      | 0             |
| NUP210L                                  | chr1 | 154001989 | rs746505953         | G   | GA  | 5              | 3                 | 2                      | Latin American 1  | 0.8                    | 0.32          |
| NUP210L                                  | chr1 | 154001989 | rs779604822         | GA  | G   | 2              | 1                 | 1                      | European          | 1                      | 0             |
| NUP210L                                  | chr1 | 154012375 | rs1407664267        | C   | A   | 2              | 1                 | 1                      | European          | 1                      | 0             |
| NUP210L                                  | chr1 | 154019080 | rs751740675         | A   | G   | 2              | 2                 | 0                      | African American  | 1                      | 0             |
| NUP210L                                  | chr1 | 154022120 | rs202099107         | A   | G   | 13             | 7                 | 6                      | European          | 1                      | 0             |
| NUP210L                                  | chr1 | 154022353 | rs757260813         | G   | A   | 3              | 1                 | 2                      | Latin American 2  | 0.666666667            | 0.444444444   |
| NUP210L                                  | chr1 | 154025733 | rs773207371         | G   | A   | 2              | 1                 | 1                      | European          | 1                      | 0             |
| NUP210L                                  | chr1 | 154054223 | rs200535202         | A   | G   | 14             | 6                 | 8                      | European          | 1                      | 0             |
| NUP210L                                  | chr1 | 154056951 | rs754469984         | C   | CA  | 3              | 1                 | 2                      | European          | 1                      | 0             |
| NUP210L                                  | chr1 | 154058558 | rs748532755         | G   | A   | 3              | 1                 | 2                      | East Asian        | 1                      | 0             |
| NUP210L                                  | chr1 | 154058691 | rs767440634         | T   | C   | 3              | 0                 | 3                      | European          | 1                      | 0             |
| NUP210L                                  | chr1 | 154060533 | rs375753204         | A   | C   | 70             | 19                | 51                     | Latin American 1  | 0.871428571            | 0.233469388   |
| NUP210L                                  | chr1 | 154060646 | chr1_154060646_G_C  | G   | C   | 8              | 3                 | 5                      | AFR               | 0.875                  | 0.21875       |
| NUP210L                                  | chr1 | 154061050 | rs904262090         | G   | C   | 3              | 1                 | 2                      | Latin American 1  | 0.666666667            | 0.444444444   |
| NUP210L                                  | chr1 | 154061582 | chr1_154061582_T_C  | T   | C   | 3              | 2                 | 1                      | East Asian        | 1                      | 0             |
| NUP210L                                  | chr1 | 154095161 | rs776584042         | T   | C   | 3              | 0                 | 3                      | Latin American 2  | 1                      | 0             |
| NUP210L                                  | chr1 | 154099991 | rs113857104         | A   | G   | 57             | 19                | 38                     | Latin American 1  | 0.596491228            | 0.507232995   |
| NUP210L                                  | chr1 | 154117718 | rs374684249         | C   | T   | 2              | 0                 | 2                      | African American  | 1                      | 0             |
| NUP210L                                  | chr1 | 154117719 | rs762887665         | G   | A   | 3              | 1                 | 2                      | European          | 0.666666667            | 0.444444444   |
| NUP210L                                  | chr1 | 154117723 | chr1_154117723_A_T  | A   | T   | 235            | 35                | 200                    | European          | 0.574468085            | 0.608166591   |
| NUP210L                                  | chr1 | 154117723 | chr1_154117723_AC_A | AC  | A   | 22             | 2                 | 20                     | European          | 0.727272727            | 0.433884298   |
| NUP210L                                  | chr1 | 154117724 | chr1_154117724_C_A  | C   | A   | 705            | 130               | 575                    | European          | 0.510638298            | 0.672131181   |
| NUP210L                                  | chr1 | 154118665 | rs77653541          | C   | G   | 37             | 15                | 22                     | East Asian        | 1                      | 0             |
| NUP210L                                  | chr1 | 154118818 | rs371223934         | C   | G   | 20             | 0                 | 20                     | South Asian       | 0.7                    | 0.445         |
| NUP210L                                  | chr1 | 154118821 | rs1273187613        | G   | A   | 2              | 0                 | 2                      | European          | 0.5                    | 0.5           |
| NUP210L                                  | chr1 | 154127421 | chr1_154127421_T_C  | T   | C   | 2              | 0                 | 2                      | South Asian       | 1                      | 0             |
| NUP210L                                  | chr1 | 154129349 | rs377611267         | A   | C   | 23             | 11                | 12                     | Latin American 1  | 0.52173913             | 0.536862004   |
| NUP210L                                  | chr1 | 154129355 | rs779121549         | TG  | T   | 6              | 3                 | 3                      | European          | 1                      | 0             |
| NUP210L                                  | chr1 | 154141531 | rs561116668         | A   | C   | 4              | 1                 | 3                      | Latin American 1  | 0.75                   | 0.375         |
| NUP210L                                  | chr1 | 154154834 | rs375016355         | C   | G   | 44             | 10                | 34                     | African American  | 0.636363636            | 0.515495868   |
| CACNA1S                                  | chr1 | 201039883 | rs72749169          | C   | T   | 167            | 50                | 117                    | European          | 0.850299401            | 0.26913837    |
| CACNA1S                                  | chr1 | 201039922 | rs145195149         | C   | G   | 4              | 2                 | 2                      | African American  | 1                      | 0             |
| CACNA1S                                  | chr1 | 201039938 | rs149547196         | G   | A   | 227            | 64                | 163                    | European          | 0.621145374            | 0.555803528   |
| CACNA1S                                  | chr1 | 201039943 | rs200765341         | T   | G   | 34             | 8                 | 26                     | Latin American 2  | 0.558823529            | 0.574394464   |
| CACNA1S                                  | chr1 | 201039970 | rs754766494         | A   | G   | 2              | 0                 | 2                      | European          | 1                      | 0             |
| CACNA1S                                  | chr1 | 201040302 | rs200434921         | G   | T   | 11             | 5                 | 6                      | European          | 0.818181818            | 0.297520661   |
| CACNA1S                                  | chr1 | 201040302 | chr1_201040302_G_A  | G   | A   | 4              | 0                 | 4                      | European          | 0.5                    | 0.625         |
| CACNA1S                                  | chr1 | 201040322 | rs554208789         | C   | G   | 5              | 1                 | 4                      | Native American   | 0.6                    | 0.48          |
| CACNA1S                                  | chr1 | 201040633 | rs542268566         | C   | T   | 2              | 0                 | 2                      | South Asian       | 1                      | 0             |
| CACNA1S                                  | chr1 | 201040647 | chr1_201040647_C_T  | C   | T   | 2              | 0                 | 2                      | European          | 1                      | 0             |
| CACNA1S                                  | chr1 | 201041533 | rs201310235         | C   | G   | 33             | 15                | 18                     | Latin American 1  | 0.96969697             | 0.058769513   |
| CACNA1S                                  | chr1 | 201041533 | chr1_201041533_C_T  | C   | T   | 8              | 5                 | 3                      | European          | 0.375                  | 0.71875       |
| CACNA1S                                  | chr1 | 201041551 | rs367577681         | G   | A   | 22             | 1                 | 21                     | South Asian       | 0.909090909            | 0.165289256   |

|         |      |           |                    |   |   |     |    |     |                  |             |             |
|---------|------|-----------|--------------------|---|---|-----|----|-----|------------------|-------------|-------------|
| CACNA1S | chr1 | 201043321 | rs146696748        | A | T | 5   | 0  | 5   | European         | 0.8         | 0.32        |
| CACNA1S | chr1 | 201043324 | rs199989324        | C | T | 3   | 1  | 2   | European         | 0.666666667 | 0.444444444 |
| CACNA1S | chr1 | 201043333 | rs145340252        | C | T | 4   | 0  | 4   | African American | 1           | 0           |
| CACNA1S | chr1 | 201043342 | rs141618437        | T | C | 11  | 3  | 8   | African American | 0.727272727 | 0.429752066 |
| CACNA1S | chr1 | 201043345 | rs200772623        | T | A | 2   | 1  | 1   | European         | 1           | 0           |
| CACNA1S | chr1 | 201043357 | rs147392278        | G | A | 26  | 2  | 24  | European         | 0.269230769 | 0.781065089 |
| CACNA1S | chr1 | 201043357 | chr1_201043357_G_T | G | T | 2   | 1  | 1   | Latin American 2 | 0.5         | 0.5         |
| CACNA1S | chr1 | 201043375 | rs143933255        | G | A | 26  | 7  | 19  | European         | 0.769230769 | 0.369822485 |
| CACNA1S | chr1 | 201043413 | rs146885451        | T | A | 5   | 1  | 4   | European         | 0.8         | 0.32        |
| CACNA1S | chr1 | 201043446 | rs576536458        | A | G | 7   | 0  | 7   | South Asian      | 1           | 0           |
| CACNA1S | chr1 | 201043471 | rs199691275        | G | C | 5   | 1  | 4   | African American | 0.6         | 0.48        |
| CACNA1S | chr1 | 201043479 | rs1313984683       | G | T | 2   | 1  | 1   | European         | 1           | 0           |
| CACNA1S | chr1 | 201044329 | rs946904077        | C | T | 3   | 2  | 1   | European         | 0.666666667 | 0.444444444 |
| CACNA1S | chr1 | 201044339 | rs751048080        | C | T | 12  | 4  | 8   | Latin American 1 | 0.583333333 | 0.486111111 |
| CACNA1S | chr1 | 201044365 | rs749495704        | G | T | 3   | 0  | 3   | Latin American 2 | 0.666666667 | 0.444444444 |
| CACNA1S | chr1 | 201044378 | rs148273582        | C | T | 25  | 14 | 11  | European         | 0.96        | 0.0768      |
| CACNA1S | chr1 | 201044394 | rs202120583        | G | C | 8   | 3  | 5   | European         | 1           | 0           |
| CACNA1S | chr1 | 201044407 | rs183195890        | G | A | 35  | 10 | 25  | European         | 0.514285714 | 0.649795918 |
| CACNA1S | chr1 | 201044420 | rs138768414        | C | T | 2   | 1  | 1   | African American | 0.5         | 0.5         |
| CACNA1S | chr1 | 201044446 | rs372436488        | C | T | 5   | 1  | 4   | Latin American 1 | 0.6         | 0.56        |
| CACNA1S | chr1 | 201044453 | rs144561492        | C | T | 2   | 1  | 1   | European         | 1           | 0           |
| CACNA1S | chr1 | 201047133 | rs1413666626       | C | A | 3   | 2  | 1   | East Asian       | 1           | 0           |
| CACNA1S | chr1 | 201047144 | rs757433005        | G | A | 3   | 0  | 3   | European         | 1           | 0           |
| CACNA1S | chr1 | 201047167 | rs774256022        | C | T | 2   | 0  | 2   | Latin American 2 | 1           | 0           |
| CACNA1S | chr1 | 201047167 | chr1_201047167_C_A | C | A | 3   | 1  | 2   | European         | 0.666666667 | 0.444444444 |
| CACNA1S | chr1 | 201047183 | rs914458618        | G | A | 2   | 2  | 0   | East Asian       | 0.5         | 0.5         |
| CACNA1S | chr1 | 201047218 | rs763242241        | T | C | 2   | 0  | 2   | Latin American 2 | 0.5         | 0.5         |
| CACNA1S | chr1 | 201047546 | rs970352258        | G | C | 2   | 1  | 1   | African American | 0.5         | 0.5         |
| CACNA1S | chr1 | 201047549 | rs772376048        | C | G | 2   | 1  | 1   | European         | 1           | 0           |
| CACNA1S | chr1 | 201047566 | rs928580339        | G | T | 2   | 0  | 2   | European         | 0.5         | 0.5         |
| CACNA1S | chr1 | 201047567 | rs373248127        | T | C | 5   | 0  | 5   | European         | 0.6         | 0.56        |
| CACNA1S | chr1 | 201047606 | rs533353353        | C | T | 8   | 0  | 8   | South Asian      | 0.875       | 0.21875     |
| CACNA1S | chr1 | 201048587 | rs780785403        | G | A | 2   | 1  | 1   | European         | 0.5         | 0.5         |
| CACNA1S | chr1 | 201048591 | rs745558537        | T | G | 2   | 0  | 2   | South Asian      | 1           | 0           |
| CACNA1S | chr1 | 201048609 | rs201257304        | G | A | 4   | 0  | 4   | European         | 0.75        | 0.375       |
| CACNA1S | chr1 | 201048648 | rs751530767        | C | T | 2   | 0  | 2   | European         | 1           | 0           |
| CACNA1S | chr1 | 201048677 | rs79011683         | A | C | 169 | 23 | 146 | European         | 0.976331361 | 0.046566997 |
| CACNA1S | chr1 | 201048683 | rs377474103        | C | T | 10  | 2  | 8   | European         | 0.8         | 0.32        |
| CACNA1S | chr1 | 201048684 | chr1_201048684_G_A | G | A | 2   | 0  | 2   | AFR              | 0.5         | 0.5         |
| CACNA1S | chr1 | 201049017 | rs759331560        | G | A | 2   | 1  | 1   | European         | 0.5         | 0.5         |
| CACNA1S | chr1 | 201049077 | rs1224786667       | C | T | 2   | 1  | 1   | European         | 1           | 0           |
| CACNA1S | chr1 | 201049091 | rs372383822        | A | T | 8   | 2  | 6   | European         | 1           | 0           |
| CACNA1S | chr1 | 201049098 | rs886045796        | C | T | 2   | 1  | 1   | European         | 1           | 0           |
| CACNA1S | chr1 | 201050460 | rs371849585        | G | C | 4   | 3  | 1   | European         | 1           | 0           |
| CACNA1S | chr1 | 201051037 | rs145910245        | T | A | 246 | 87 | 159 | European         | 0.808943089 | 0.326921806 |
| CACNA1S | chr1 | 201051037 | chr1_201051037_T_G | T | G | 2   | 0  | 2   | Latin American 1 | 0.5         | 0.5         |

|         |      |           |                    |   |   |     |    |     |                  |             |             |
|---------|------|-----------|--------------------|---|---|-----|----|-----|------------------|-------------|-------------|
| CACNA1S | chr1 | 201051054 | rs1310927239       | T | A | 3   | 1  | 2   | African American | 1           | 0           |
| CACNA1S | chr1 | 201051057 | rs752954170        | C | A | 2   | 1  | 1   | African American | 1           | 0           |
| CACNA1S | chr1 | 201051096 | rs146158332        | T | C | 6   | 3  | 3   | Latin American 1 | 0.666666667 | 0.444444444 |
| CACNA1S | chr1 | 201051135 | rs775654393        | G | T | 3   | 0  | 3   | AFR              | 0.333333333 | 0.666666667 |
| CACNA1S | chr1 | 201051143 | chr1_201051143_C_A | C | A | 2   | 0  | 2   | African American | 0.5         | 0.5         |
| CACNA1S | chr1 | 201052605 | rs200042281        | C | T | 11  | 3  | 8   | Latin American 2 | 0.636363636 | 0.512396694 |
| CACNA1S | chr1 | 201052606 | rs780390034        | G | A | 5   | 0  | 5   | European         | 0.8         | 0.32        |
| CACNA1S | chr1 | 201052620 | rs749856222        | C | T | 9   | 4  | 5   | Latin American 2 | 0.888888889 | 0.197530864 |
| CACNA1S | chr1 | 201052633 | rs555016254        | C | T | 2   | 0  | 2   | Latin American 1 | 0.5         | 0.5         |
| CACNA1S | chr1 | 201053217 | rs768535906        | C | T | 2   | 0  | 2   | South Asian      | 1           | 0           |
| CACNA1S | chr1 | 201053226 | rs774300377        | C | A | 7   | 2  | 5   | Latin American 2 | 0.857142857 | 0.244897959 |
| CACNA1S | chr1 | 201053247 | rs760441649        | C | T | 5   | 1  | 4   | European         | 0.6         | 0.48        |
| CACNA1S | chr1 | 201053259 | rs138144724        | C | T | 265 | 84 | 181 | African American | 0.539622642 | 0.598049128 |
| CACNA1S | chr1 | 201053262 | rs749105028        | C | T | 2   | 0  | 2   | European         | 0.5         | 0.5         |
| CACNA1S | chr1 | 201053488 | chr1_201053488_G_A | G | A | 2   | 0  | 2   | Latin American 1 | 1           | 0           |
| CACNA1S | chr1 | 201053493 | rs530655602        | C | T | 28  | 0  | 28  | South Asian      | 0.857142857 | 0.257653061 |
| CACNA1S | chr1 | 201053494 | rs200034567        | G | C | 5   | 2  | 3   | European         | 1           | 0           |
| CACNA1S | chr1 | 201053500 | rs768780512        | C | T | 2   | 1  | 1   | European         | 1           | 0           |
| CACNA1S | chr1 | 201053508 | rs775009783        | C | T | 3   | 0  | 3   | Latin American 1 | 0.333333333 | 0.666666667 |
| CACNA1S | chr1 | 201053529 | rs750637537        | C | T | 2   | 1  | 1   | European         | 0.5         | 0.5         |
| CACNA1S | chr1 | 201053532 | rs756259956        | A | G | 3   | 3  | 0   | Latin American 1 | 1           | 0           |
| CACNA1S | chr1 | 201053568 | rs774416016        | C | T | 2   | 0  | 2   | European         | 0.5         | 0.5         |
| CACNA1S | chr1 | 201053578 | rs1352459952       | C | T | 2   | 0  | 2   | European         | 1           | 0           |
| CACNA1S | chr1 | 201054507 | rs202240111        | C | T | 2   | 0  | 2   | East Asian       | 0.5         | 0.5         |
| CACNA1S | chr1 | 201054543 | rs148870919        | C | T | 47  | 15 | 32  | European         | 0.872340426 | 0.222725215 |
| CACNA1S | chr1 | 201058410 | rs367956917        | C | T | 2   | 0  | 2   | European         | 1           | 0           |
| CACNA1S | chr1 | 201058433 | rs200366112        | A | G | 3   | 2  | 1   | African American | 0.333333333 | 0.666666667 |
| CACNA1S | chr1 | 201059196 | chr1_201059196_T_A | T | A | 2   | 0  | 2   | South Asian      | 1           | 0           |
| CACNA1S | chr1 | 201059286 | rs756712640        | G | A | 2   | 0  | 2   | South Asian      | 1           | 0           |
| CACNA1S | chr1 | 201059289 | rs139373152        | T | G | 40  | 9  | 31  | African American | 0.4         | 0.69125     |
| CACNA1S | chr1 | 201059289 | chr1_201059289_T_C | T | C | 2   | 0  | 2   | South Asian      | 1           | 0           |
| CACNA1S | chr1 | 201059298 | rs756628359        | T | G | 3   | 0  | 3   | European         | 1           | 0           |
| CACNA1S | chr1 | 201060666 | rs145039828        | C | T | 4   | 2  | 2   | European         | 1           | 0           |
| CACNA1S | chr1 | 201060674 | chr1_201060674_A_G | A | G | 3   | 0  | 3   | Latin American 1 | 0.666666667 | 0.444444444 |
| CACNA1S | chr1 | 201060738 | rs151218760        | A | C | 10  | 3  | 7   | African American | 0.7         | 0.46        |
| CACNA1S | chr1 | 201060741 | rs200558548        | C | T | 8   | 2  | 6   | Latin American 2 | 0.875       | 0.21875     |
| CACNA1S | chr1 | 201060785 | rs142102094        | C | T | 35  | 20 | 15  | Latin American 1 | 0.885714286 | 0.207346939 |
| CACNA1S | chr1 | 201060786 | rs781178565        | G | A | 2   | 1  | 1   | European         | 1           | 0           |
| CACNA1S | chr1 | 201060811 | chr1_201060811_T_G | T | G | 3   | 0  | 3   | Latin American 2 | 0.666666667 | 0.444444444 |
| CACNA1S | chr1 | 201060815 | rs1800559          | C | T | 2   | 0  | 2   | African American | 0.5         | 0.5         |
| CACNA1S | chr1 | 201061332 | rs138837077        | C | T | 10  | 4  | 6   | European         | 0.8         | 0.34        |
| CACNA1S | chr1 | 201061379 | rs745571736        | T | C | 16  | 3  | 13  | Latin American 1 | 0.5625      | 0.4921875   |
| CACNA1S | chr1 | 201061382 | rs769489062        | A | T | 3   | 1  | 2   | East Asian       | 1           | 0           |
| CACNA1S | chr1 | 201061398 | rs562504992        | C | T | 2   | 0  | 2   | South Asian      | 1           | 0           |
| CACNA1S | chr1 | 201061409 | rs774884290        | C | T | 5   | 3  | 2   | European         | 0.4         | 0.72        |
| CACNA1S | chr1 | 201061431 | rs777328046        | C | T | 3   | 1  | 2   | European         | 0.666666667 | 0.444444444 |

|         |      |           |                    |   |   |     |     |     |                  |             |             |
|---------|------|-----------|--------------------|---|---|-----|-----|-----|------------------|-------------|-------------|
| CACNA1S | chr1 | 201061455 | rs551510986        | C | T | 4   | 1   | 3   | African American | 0.75        | 0.375       |
| CACNA1S | chr1 | 201061954 | rs202242262        | C | T | 3   | 2   | 1   | East Asian       | 0.666666667 | 0.444444444 |
| CACNA1S | chr1 | 201061971 | rs200224590        | G | A | 9   | 4   | 5   | European         | 0.888888889 | 0.197530864 |
| CACNA1S | chr1 | 201061984 | rs149658326        | T | A | 7   | 2   | 5   | European         | 0.714285714 | 0.408163265 |
| CACNA1S | chr1 | 201061987 | chr1_201061987_T_A | T | A | 2   | 1   | 1   | Native American  | 1           | 0           |
| CACNA1S | chr1 | 201062005 | rs116347156        | C | T | 69  | 17  | 52  | African American | 0.623188406 | 0.533921445 |
| CACNA1S | chr1 | 201062017 | rs369941827        | C | T | 3   | 0   | 3   | European         | 0.666666667 | 0.444444444 |
| CACNA1S | chr1 | 201062018 | rs146497999        | G | T | 2   | 1   | 1   | African American | 0.5         | 0.5         |
| CACNA1S | chr1 | 201062032 | rs922494615        | C | T | 2   | 0   | 2   | East Asian       | 0.5         | 0.5         |
| CACNA1S | chr1 | 201062034 | rs747618077        | C | T | 7   | 1   | 6   | Latin American 2 | 0.571428571 | 0.571428571 |
| CACNA1S | chr1 | 201062035 | rs143722841        | G | A | 2   | 0   | 2   | Latin American 2 | 1           | 0           |
| CACNA1S | chr1 | 201062037 | rs201174511        | T | C | 12  | 6   | 6   | East Asian       | 1           | 0           |
| CACNA1S | chr1 | 201062040 | rs140453525        | C | T | 7   | 2   | 5   | African American | 0.428571429 | 0.693877551 |
| CACNA1S | chr1 | 201062041 | rs770099347        | G | A | 2   | 0   | 2   | European         | 1           | 0           |
| CACNA1S | chr1 | 201065852 | rs76460090         | C | T | 5   | 0   | 5   | East Asian       | 0.8         | 0.32        |
| CACNA1S | chr1 | 201065855 | rs569324688        | C | T | 3   | 0   | 3   | Latin American 2 | 0.666666667 | 0.444444444 |
| CACNA1S | chr1 | 201065869 | rs575247457        | A | G | 6   | 4   | 2   | European         | 1           | 0           |
| CACNA1S | chr1 | 201065870 | chr1_201065870_T_G | T | G | 2   | 0   | 2   | European         | 1           | 0           |
| CACNA1S | chr1 | 201065897 | rs373701906        | C | T | 3   | 0   | 3   | Latin American 1 | 0.666666667 | 0.444444444 |
| CACNA1S | chr1 | 201065900 | rs778518002        | T | C | 2   | 0   | 2   | European         | 0.5         | 0.5         |
| CACNA1S | chr1 | 201065906 | rs146903750        | C | T | 4   | 2   | 2   | European         | 0.5         | 0.625       |
| CACNA1S | chr1 | 201065918 | rs138708497        | T | C | 4   | 2   | 2   | Latin American 1 | 0.75        | 0.375       |
| CACNA1S | chr1 | 201065927 | rs1211786403       | A | G | 2   | 1   | 1   | European         | 1           | 0           |
| CACNA1S | chr1 | 201065929 | rs765793568        | A | G | 2   | 0   | 2   | Latin American 2 | 1           | 0           |
| CACNA1S | chr1 | 201065942 | rs751833750        | C | T | 4   | 0   | 4   | European         | 1           | 0           |
| CACNA1S | chr1 | 201066245 | rs375318710        | C | T | 2   | 0   | 2   | European         | 0.5         | 0.5         |
| CACNA1S | chr1 | 201066248 | rs139935847        | T | C | 5   | 0   | 5   | European         | 1           | 0           |
| CACNA1S | chr1 | 201066897 | chr1_201066897_T_G | T | G | 3   | 0   | 3   | South Asian      | 0.666666667 | 0.444444444 |
| CACNA1S | chr1 | 201066909 | rs573597311        | A | G | 5   | 2   | 3   | East Asian       | 1           | 0           |
| CACNA1S | chr1 | 201066912 | rs202131129        | C | T | 7   | 4   | 3   | East Asian       | 0.571428571 | 0.489795918 |
| CACNA1S | chr1 | 201066914 | rs200646947        | G | A | 6   | 1   | 5   | European         | 0.666666667 | 0.444444444 |
| CACNA1S | chr1 | 201066950 | rs545411173        | C | T | 5   | 1   | 4   | Latin American 2 | 0.8         | 0.32        |
| CACNA1S | chr1 | 201066951 | rs201205904        | G | A | 12  | 1   | 11  | European         | 0.333333333 | 0.75        |
| CACNA1S | chr1 | 201066962 | rs369192794        | C | G | 3   | 1   | 2   | African American | 0.666666667 | 0.444444444 |
| CACNA1S | chr1 | 201066989 | rs200334886        | G | A | 4   | 2   | 2   | European         | 0.5         | 0.625       |
| CACNA1S | chr1 | 201069482 | rs61238538         | A | G | 430 | 116 | 314 | African American | 0.555813953 | 0.599956733 |
| CACNA1S | chr1 | 201069494 | rs553619980        | C | T | 2   | 1   | 1   | European         | 0.5         | 0.5         |
| CACNA1S | chr1 | 201069495 | rs199758244        | G | A | 4   | 1   | 3   | European         | 1           | 0           |
| CACNA1S | chr1 | 201069509 | rs372668776        | G | A | 3   | 0   | 3   | European         | 0.666666667 | 0.444444444 |
| CACNA1S | chr1 | 201069522 | rs139956524        | C | T | 80  | 27  | 53  | European         | 0.8375      | 0.289375    |
| CACNA1S | chr1 | 201069543 | rs773958053        | G | T | 2   | 1   | 1   | Latin American 1 | 0.5         | 0.5         |
| CACNA1S | chr1 | 201069554 | rs201528828        | T | C | 2   | 1   | 1   | East Asian       | 0.5         | 0.5         |
| CACNA1S | chr1 | 201069581 | rs760674518        | C | T | 7   | 1   | 6   | Latin American 2 | 0.714285714 | 0.408163265 |
| CACNA1S | chr1 | 201069582 | rs373328930        | G | A | 3   | 0   | 3   | European         | 0.333333333 | 0.666666667 |
| CACNA1S | chr1 | 201070289 | rs199990080        | G | C | 5   | 0   | 5   | Latin American 1 | 1           | 0           |
| CACNA1S | chr1 | 201070315 | rs566562378        | T | C | 2   | 1   | 1   | East Asian       | 0.5         | 0.5         |

|         |      |           |                    |      |   |     |     |     |                  |             |             |
|---------|------|-----------|--------------------|------|---|-----|-----|-----|------------------|-------------|-------------|
| CACNA1S | chr1 | 201070321 | rs778705388        | C    | A | 2   | 0   | 2   | African American | 0.5         | 0.5         |
| CACNA1S | chr1 | 201070336 | rs771865391        | G    | T | 7   | 1   | 6   | South Asian      | 0.571428571 | 0.571428571 |
| CACNA1S | chr1 | 201070353 | rs1361352939       | G    | A | 2   | 0   | 2   | African American | 0.5         | 0.5         |
| CACNA1S | chr1 | 201072775 | rs756870237        | T    | A | 2   | 0   | 2   | European         | 1           | 0           |
| CACNA1S | chr1 | 201073607 | rs147112322        | G    | A | 14  | 4   | 10  | European         | 0.5         | 0.653061224 |
| CACNA1S | chr1 | 201073614 | rs1225367412       | TCTC | T | 4   | 0   | 4   | African American | 0.75        | 0.375       |
| CACNA1S | chr1 | 201073631 | chr1_201073631_T_C | T    | C | 2   | 0   | 2   | East Asian       | 1           | 0           |
| CACNA1S | chr1 | 201074512 | chr1_201074512_A_G | A    | G | 3   | 2   | 1   | Latin American 1 | 0.666666667 | 0.444444444 |
| CACNA1S | chr1 | 201074514 | rs200844059        | C    | G | 3   | 1   | 2   | European         | 1           | 0           |
| CACNA1S | chr1 | 201074521 | rs141031133        | C    | T | 3   | 0   | 3   | European         | 1           | 0           |
| CACNA1S | chr1 | 201074522 | rs35708442         | G    | A | 485 | 157 | 328 | African American | 0.536082474 | 0.608166649 |
| CACNA1S | chr1 | 201074522 | chr1_201074522_G_T | G    | T | 2   | 1   | 1   | Latin American 1 | 1           | 0           |
| CACNA1S | chr1 | 201074573 | rs377082783        | C    | T | 5   | 1   | 4   | South Asian      | 0.6         | 0.48        |
| CACNA1S | chr1 | 201075498 | rs760246258        | T    | G | 16  | 5   | 11  | Latin American 1 | 0.5625      | 0.578125    |
| CACNA1S | chr1 | 201075507 | rs139860737        | C    | T | 15  | 9   | 6   | East Asian       | 0.866666667 | 0.24        |
| CACNA1S | chr1 | 201075528 | rs185777948        | T    | C | 2   | 1   | 1   | East Asian       | 1           | 0           |
| CACNA1S | chr1 | 201075539 | rs144590408        | A    | G | 3   | 1   | 2   | European         | 1           | 0           |
| CACNA1S | chr1 | 201075540 | rs201784750        | T    | C | 20  | 6   | 14  | European         | 0.75        | 0.375       |
| CACNA1S | chr1 | 201075554 | rs150646872        | G    | A | 6   | 3   | 3   | African American | 0.5         | 0.611111111 |
| CACNA1S | chr1 | 201075558 | rs147888089        | C    | T | 2   | 2   | 0   | European         | 0.5         | 0.5         |
| CACNA1S | chr1 | 201075561 | rs768445692        | C    | T | 2   | 2   | 0   | European         | 1           | 0           |
| CACNA1S | chr1 | 201075588 | rs776996468        | T    | C | 2   | 0   | 2   | South Asian      | 1           | 0           |
| CACNA1S | chr1 | 201075591 | rs149195094        | A    | C | 2   | 0   | 2   | European         | 1           | 0           |
| CACNA1S | chr1 | 201075615 | rs756131999        | C    | A | 4   | 2   | 2   | Latin American 1 | 0.75        | 0.375       |
| CACNA1S | chr1 | 201076928 | rs377461013        | C    | T | 2   | 1   | 1   | African American | 1           | 0           |
| CACNA1S | chr1 | 201076930 | rs142356235        | C    | T | 559 | 188 | 371 | European         | 0.772808587 | 0.382602462 |
| CACNA1S | chr1 | 201076966 | rs762032797        | C    | A | 4   | 1   | 3   | African American | 0.75        | 0.375       |
| CACNA1S | chr1 | 201076967 | rs200165212        | G    | A | 24  | 7   | 17  | Latin American 2 | 0.875       | 0.225694444 |
| CACNA1S | chr1 | 201076970 | chr1_201076970_G_A | G    | A | 6   | 0   | 6   | European         | 1           | 0           |
| CACNA1S | chr1 | 201076979 | chr1_201076979_T_C | T    | C | 2   | 2   | 0   | Native American  | 1           | 0           |
| CACNA1S | chr1 | 201077002 | rs377459546        | C    | G | 2   | 1   | 1   | East Asian       | 0.5         | 0.5         |
| CACNA1S | chr1 | 201077024 | rs772213240        | G    | A | 4   | 1   | 3   | European         | 1           | 0           |
| CACNA1S | chr1 | 201077036 | rs114191482        | C    | T | 116 | 42  | 74  | African American | 0.5         | 0.618906064 |
| CACNA1S | chr1 | 201077077 | rs4915212          | C    | T | 81  | 17  | 64  | Latin American 2 | 0.790123457 | 0.341106539 |
| CACNA1S | chr1 | 201077078 | rs756612471        | G    | A | 9   | 2   | 7   | European         | 0.666666667 | 0.518518519 |
| CACNA1S | chr1 | 201077906 | rs748711395        | C    | T | 4   | 1   | 3   | European         | 1           | 0           |
| CACNA1S | chr1 | 201077916 | rs80338778         | G    | A | 5   | 0   | 5   | Latin American 1 | 1           | 0           |
| CACNA1S | chr1 | 201077936 | rs1253021609       | G    | A | 3   | 2   | 1   | European         | 0.666666667 | 0.444444444 |
| CACNA1S | chr1 | 201077946 | rs776209588        | C    | T | 3   | 1   | 2   | European         | 0.666666667 | 0.444444444 |
| CACNA1S | chr1 | 201077951 | rs140662085        | G    | A | 51  | 19  | 32  | European         | 0.784313725 | 0.367550942 |
| CACNA1S | chr1 | 201077996 | rs767628675        | C    | A | 2   | 0   | 2   | Latin American 2 | 1           | 0           |
| CACNA1S | chr1 | 201078005 | rs150590855        | C    | A | 51  | 24  | 27  | European         | 0.607843137 | 0.577470204 |
| CACNA1S | chr1 | 201078005 | chr1_201078005_C_T | C    | T | 20  | 9   | 11  | European         | 0.9         | 0.185       |
| CACNA1S | chr1 | 201078006 | rs532351874        | G    | A | 4   | 2   | 2   | European         | 0.5         | 0.5         |
| CACNA1S | chr1 | 201078021 | rs757006372        | T    | G | 2   | 0   | 2   | Latin American 2 | 1           | 0           |
| CACNA1S | chr1 | 201078021 | chr1_201078021_T_A | T    | A | 2   | 1   | 1   | Latin American 2 | 0.5         | 0.5         |

|         |      |           |                    |   |   |     |     |     |                  |             |             |
|---------|------|-----------|--------------------|---|---|-----|-----|-----|------------------|-------------|-------------|
| CACNA1S | chr1 | 201078032 | rs553739117        | C | T | 6   | 1   | 5   | Latin American 2 | 0.5         | 0.5         |
| CACNA1S | chr1 | 201078033 | rs138364213        | G | A | 4   | 1   | 3   | African American | 0.5         | 0.625       |
| CACNA1S | chr1 | 201078045 | rs375469357        | C | T | 3   | 0   | 3   | African American | 0.333333333 | 0.666666667 |
| CACNA1S | chr1 | 201078092 | rs371024880        | C | A | 2   | 1   | 1   | South Asian      | 1           | 0           |
| CACNA1S | chr1 | 201083170 | rs146696298        | C | T | 6   | 1   | 5   | South Asian      | 0.5         | 0.611111111 |
| CACNA1S | chr1 | 201083173 | rs143202536        | G | A | 15  | 7   | 8   | African American | 0.866666667 | 0.24        |
| CACNA1S | chr1 | 201083185 | rs1450678337       | G | A | 3   | 1   | 2   | European         | 1           | 0           |
| CACNA1S | chr1 | 201083203 | rs35521793         | G | A | 5   | 2   | 3   | European         | 1           | 0           |
| CACNA1S | chr1 | 201083207 | rs150218077        | C | T | 7   | 2   | 5   | European         | 0.714285714 | 0.448979592 |
| CACNA1S | chr1 | 201083230 | rs202217590        | A | G | 2   | 1   | 1   | European         | 1           | 0           |
| CACNA1S | chr1 | 201083231 | rs572977674        | C | T | 25  | 12  | 13  | Latin American 1 | 0.8         | 0.32        |
| CACNA1S | chr1 | 201083254 | rs146136274        | A | G | 43  | 15  | 28  | European         | 0.976744186 | 0.045429962 |
| CACNA1S | chr1 | 201083300 | rs759510146        | G | A | 2   | 2   | 0   | East Asian       | 1           | 0           |
| CACNA1S | chr1 | 201083320 | rs761248676        | C | T | 2   | 0   | 2   | European         | 0.5         | 0.5         |
| CACNA1S | chr1 | 201085002 | rs112236248        | C | T | 7   | 2   | 5   | Latin American 1 | 0.714285714 | 0.408163265 |
| CACNA1S | chr1 | 201085016 | rs148770452        | T | A | 15  | 4   | 11  | European         | 1           | 0           |
| CACNA1S | chr1 | 201085031 | rs201737381        | C | T | 4   | 2   | 2   | European         | 1           | 0           |
| CACNA1S | chr1 | 201085466 | rs758280510        | C | T | 7   | 2   | 5   | Latin American 1 | 0.857142857 | 0.244897959 |
| CACNA1S | chr1 | 201085474 | rs150954040        | G | A | 9   | 4   | 5   | African American | 0.444444444 | 0.716049383 |
| CACNA1S | chr1 | 201087925 | rs765889961        | T | C | 3   | 1   | 2   | Latin American 1 | 0.666666667 | 0.444444444 |
| CACNA1S | chr1 | 201089260 | rs370325121        | A | G | 3   | 0   | 3   | European         | 1           | 0           |
| CACNA1S | chr1 | 201089263 | rs35856559         | A | G | 326 | 99  | 227 | African American | 0.564417178 | 0.59010501  |
| CACNA1S | chr1 | 201089296 | rs201585867        | A | C | 3   | 2   | 1   | European         | 0.666666667 | 0.444444444 |
| CACNA1S | chr1 | 201089305 | rs770679071        | C | T | 3   | 1   | 2   | European         | 0.666666667 | 0.444444444 |
| CACNA1S | chr1 | 201089332 | rs757755172        | C | T | 2   | 0   | 2   | East Asian       | 0.5         | 0.5         |
| CACNA1S | chr1 | 201089368 | rs779029870        | C | T | 4   | 0   | 4   | African American | 0.5         | 0.5         |
| CACNA1S | chr1 | 201089374 | rs186538122        | G | A | 8   | 5   | 3   | East Asian       | 0.75        | 0.40625     |
| CACNA1S | chr1 | 201089385 | rs35534614         | C | T | 617 | 216 | 401 | European         | 0.719611021 | 0.45312578  |
| CACNA1S | chr1 | 201089385 | chr1_201089385_C_A | C | A | 25  | 4   | 21  | European         | 1           | 0           |
| CACNA1S | chr1 | 201089392 | rs190152688        | T | C | 12  | 6   | 6   | East Asian       | 1           | 0           |
| CACNA1S | chr1 | 201089403 | rs766838790        | C | T | 3   | 0   | 3   | African American | 0.666666667 | 0.444444444 |
| CACNA1S | chr1 | 201089415 | rs200665694        | G | A | 15  | 3   | 12  | European         | 0.8         | 0.346666667 |
| CACNA1S | chr1 | 201089451 | rs767790285        | G | A | 4   | 0   | 4   | Latin American 2 | 0.75        | 0.375       |
| CACNA1S | chr1 | 201089458 | rs370661912        | C | T | 3   | 0   | 3   | European         | 0.666666667 | 0.444444444 |
| CACNA1S | chr1 | 201091669 | rs1287586310       | A | T | 5   | 2   | 3   | European         | 1           | 0           |
| CACNA1S | chr1 | 201091709 | rs566565917        | T | C | 2   | 2   | 0   | European         | 1           | 0           |
| CACNA1S | chr1 | 201091736 | rs527702358        | C | T | 5   | 2   | 3   | European         | 1           | 0           |
| CACNA1S | chr1 | 201091983 | rs141204958        | G | A | 24  | 10  | 14  | European         | 0.958333333 | 0.079861111 |
| CACNA1S | chr1 | 201091993 | rs772226819        | G | A | 2   | 2   | 0   | East Asian       | 0.5         | 0.5         |
| CACNA1S | chr1 | 201091999 | rs370041629        | G | A | 2   | 0   | 2   | European         | 0.5         | 0.5         |
| CACNA1S | chr1 | 201092023 | rs747238231        | G | A | 2   | 0   | 2   | European         | 1           | 0           |
| CACNA1S | chr1 | 201092032 | rs138265497        | C | T | 4   | 2   | 2   | European         | 1           | 0           |
| CACNA1S | chr1 | 201092043 | chr1_201092043_G_C | G | C | 2   | 1   | 1   | European         | 1           | 0           |
| CACNA1S | chr1 | 201092053 | rs761768992        | T | C | 3   | 0   | 3   | South Asian      | 1           | 0           |
| CACNA1S | chr1 | 201092068 | rs74642988         | T | C | 18  | 3   | 15  | East Asian       | 1           | 0           |
| CACNA1S | chr1 | 201092104 | rs753195502        | C | T | 2   | 0   | 2   | European         | 0.5         | 0.5         |

|         |      |           |                    |     |   |     |     |     |                  |             |             |
|---------|------|-----------|--------------------|-----|---|-----|-----|-----|------------------|-------------|-------------|
| CACNA1S | chr1 | 201093886 | rs377030324        | G   | T | 60  | 1   | 59  | South Asian      | 0.983333333 | 0.032777778 |
| CACNA1S | chr1 | 201093897 | rs139491817        | G   | C | 93  | 26  | 67  | African American | 0.580645161 | 0.557752341 |
| CACNA1S | chr1 | 201093944 | rs374324813        | G   | C | 3   | 0   | 3   | Latin American 1 | 0.666666667 | 0.444444444 |
| CACNA1S | chr1 | 201093955 | rs764602257        | C   | T | 4   | 0   | 4   | Latin American 1 | 0.75        | 0.375       |
| CACNA1S | chr1 | 201093996 | rs550479246        | A   | G | 2   | 0   | 2   | South Asian      | 1           | 0           |
| CACNA1S | chr1 | 201094018 | rs140330831        | T   | C | 11  | 6   | 5   | European         | 0.636363636 | 0.52892562  |
| GPR37L1 | chr1 | 202123090 | rs373409302        | C   | T | 2   | 2   | 0   | East Asian       | 0.5         | 0.5         |
| GPR37L1 | chr1 | 202128116 | rs746499872        | C   | T | 2   | 2   | 0   | European         | 1           | 0           |
| GPR37L1 | chr1 | 202128534 | rs1227922634       | TGC | T | 2   | 1   | 1   | East Asian       | 1           | 0           |
| GPR37L1 | chr1 | 202128556 | chr1_202128556_A_T | A   | T | 675 | 217 | 458 | European         | 0.34962963  | 0.772218381 |
| GPR37L1 | chr1 | 202128556 | chr1_202128556_A_G | A   | G | 6   | 0   | 6   | African American | 0.333333333 | 0.777777778 |
| EXO1    | chr1 | 241850498 | rs372301145        | C   | A | 8   | 3   | 5   | Latin American 1 | 0.875       | 0.21875     |
| EXO1    | chr1 | 241850523 | rs771577156        | G   | C | 2   | 0   | 2   | Latin American 2 | 0.5         | 0.5         |
| EXO1    | chr1 | 241850534 | rs572094015        | A   | G | 2   | 1   | 1   | European         | 1           | 0           |
| EXO1    | chr1 | 241850541 | chr1_241850541_C_A | C   | A | 2   | 0   | 2   | European         | 1           | 0           |
| EXO1    | chr1 | 241850586 | rs766312563        | G   | A | 2   | 1   | 1   | African American | 0.5         | 0.5         |
| EXO1    | chr1 | 241852306 | rs200962199        | G   | C | 7   | 1   | 6   | South Asian      | 1           | 0           |
| EXO1    | chr1 | 241852356 | rs4149864          | G   | A | 348 | 104 | 244 | African American | 0.568965517 | 0.595323028 |
| EXO1    | chr1 | 241852397 | rs147963292        | G   | C | 26  | 10  | 16  | African American | 0.653846154 | 0.51183432  |
| EXO1    | chr1 | 241852407 | rs4149865          | A   | G | 445 | 131 | 314 | African American | 0.57752809  | 0.580441863 |
| EXO1    | chr1 | 241853398 | rs567681802        | C   | T | 2   | 0   | 2   | East Asian       | 0.5         | 0.5         |
| EXO1    | chr1 | 241853399 | rs147687027        | G   | A | 4   | 0   | 4   | South Asian      | 0.75        | 0.375       |
| EXO1    | chr1 | 241853401 | rs143546023        | G   | A | 18  | 6   | 12  | European         | 0.944444444 | 0.104938272 |
| EXO1    | chr1 | 241853414 | rs373710484        | C   | T | 5   | 4   | 1   | European         | 0.8         | 0.32        |
| EXO1    | chr1 | 241853479 | rs779653956        | A   | G | 3   | 0   | 3   | South Asian      | 0.666666667 | 0.444444444 |
| EXO1    | chr1 | 241857348 | rs147663824        | G   | T | 67  | 22  | 45  | European         | 0.611940299 | 0.574292716 |
| EXO1    | chr1 | 241857358 | rs369513542        | A   | G | 5   | 4   | 1   | European         | 1           | 0           |
| EXO1    | chr1 | 241857360 | rs373134694        | G   | C | 6   | 1   | 5   | European         | 0.833333333 | 0.277777778 |
| EXO1    | chr1 | 241857368 | rs149474050        | T   | A | 70  | 20  | 50  | European         | 0.428571429 | 0.629795918 |
| EXO1    | chr1 | 241857371 | rs756050889        | C   | G | 4   | 1   | 3   | Latin American 2 | 1           | 0           |
| EXO1    | chr1 | 241857381 | rs778317733        | C   | T | 3   | 1   | 2   | East Asian       | 1           | 0           |
| EXO1    | chr1 | 241857411 | rs140218725        | C   | G | 4   | 1   | 3   | European         | 0.75        | 0.375       |
| EXO1    | chr1 | 241857432 | rs78172944         | C   | A | 109 | 6   | 103 | European         | 0.963302752 | 0.071542799 |
| EXO1    | chr1 | 241857438 | rs748644107        | A   | G | 2   | 2   | 0   | European         | 1           | 0           |
| EXO1    | chr1 | 241858525 | rs150454803        | A   | G | 2   | 1   | 1   | East Asian       | 1           | 0           |
| EXO1    | chr1 | 241858581 | rs749761548        | G   | A | 2   | 1   | 1   | African American | 1           | 0           |
| EXO1    | chr1 | 241858594 | rs560299246        | C   | T | 3   | 0   | 3   | Latin American 2 | 0.666666667 | 0.444444444 |
| EXO1    | chr1 | 241858603 | rs1314461218       | A   | G | 2   | 0   | 2   | European         | 1           | 0           |
| EXO1    | chr1 | 241858653 | rs755850791        | C   | T | 2   | 0   | 2   | European         | 0.5         | 0.5         |
| EXO1    | chr1 | 241858696 | rs747186288        | C   | G | 10  | 6   | 4   | East Asian       | 1           | 0           |
| EXO1    | chr1 | 241858699 | rs765785025        | A   | G | 3   | 1   | 2   | African American | 0.666666667 | 0.444444444 |
| EXO1    | chr1 | 241858704 | rs1186055154       | C   | T | 5   | 1   | 4   | Latin American 1 | 1           | 0           |
| EXO1    | chr1 | 241858707 | rs61750993         | G   | A | 185 | 68  | 117 | European         | 0.92972973  | 0.13393718  |
| EXO1    | chr1 | 241860557 | rs150105848        | C   | T | 2   | 1   | 1   | European         | 1           | 0           |
| EXO1    | chr1 | 241860569 | rs201509012        | A   | T | 38  | 17  | 21  | European         | 0.710526316 | 0.457063712 |
| EXO1    | chr1 | 241860580 | rs149397534        | G   | A | 186 | 77  | 109 | European         | 0.612903226 | 0.540582726 |

|      |      |           |                    |               |      |     |     |     |                  |             |             |
|------|------|-----------|--------------------|---------------|------|-----|-----|-----|------------------|-------------|-------------|
| EXO1 | chr1 | 241860599 | rs200754492        | A             | G    | 9   | 2   | 7   | European         | 1           | 0           |
| EXO1 | chr1 | 241860656 | rs4149910          | A             | G    | 285 | 90  | 195 | African American | 0.614035088 | 0.553868883 |
| EXO1 | chr1 | 241860669 | rs143367336        | T             | G    | 11  | 4   | 7   | European         | 0.909090909 | 0.165289256 |
| EXO1 | chr1 | 241860678 | rs1167552447       | T             | A    | 2   | 1   | 1   | African American | 1           | 0           |
| EXO1 | chr1 | 241860679 | rs201323654        | C             | T    | 9   | 0   | 9   | African American | 0.444444444 | 0.592592593 |
| EXO1 | chr1 | 241860685 | rs146714333        | A             | G    | 3   | 1   | 2   | African American | 1           | 0           |
| EXO1 | chr1 | 241860697 | chr1_241860697_G_T | G             | T    | 2   | 0   | 2   | European         | 1           | 0           |
| EXO1 | chr1 | 241861423 | rs144135764        | T             | C    | 6   | 1   | 5   | AFR              | 0.5         | 0.666666667 |
| EXO1 | chr1 | 241861465 | rs112699482        | T             | C    | 8   | 0   | 8   | Latin American 1 | 0.625       | 0.46875     |
| EXO1 | chr1 | 241866834 | rs149029711        | C             | T    | 3   | 2   | 1   | Latin American 1 | 1           | 0           |
| EXO1 | chr1 | 241866848 | rs760597120        | C             | T    | 2   | 0   | 2   | European         | 1           | 0           |
| EXO1 | chr1 | 241866851 | rs753819273        | A             | G    | 2   | 1   | 1   | European         | 1           | 0           |
| EXO1 | chr1 | 241866869 | rs202181576        | T             | A    | 8   | 0   | 8   | Latin American 2 | 0.875       | 0.21875     |
| EXO1 | chr1 | 241866882 | rs754871794        | C             | G    | 9   | 4   | 5   | European         | 1           | 0           |
| EXO1 | chr1 | 241866905 | rs149349773        | A             | G    | 15  | 3   | 12  | European         | 1           | 0           |
| EXO1 | chr1 | 241866965 | rs760362865        | A             | T    | 2   | 1   | 1   | East Asian       | 1           | 0           |
| EXO1 | chr1 | 241867029 | rs543887227        | C             | T    | 3   | 0   | 3   | South Asian      | 1           | 0           |
| EXO1 | chr1 | 241867049 | rs762348945        | A             | G    | 3   | 2   | 1   | European         | 1           | 0           |
| EXO1 | chr1 | 241867053 | rs148510810        | G             | A    | 44  | 17  | 27  | European         | 0.931818182 | 0.127066116 |
| EXO1 | chr1 | 241872032 | rs146098746        | C             | A    | 90  | 22  | 68  | African American | 0.6         | 0.549382716 |
| EXO1 | chr1 | 241872065 | rs1444229865       | A             | T    | 2   | 0   | 2   | European         | 0.5         | 0.5         |
| EXO1 | chr1 | 241872080 | rs779981618        | CGAfrican Ame | C    | 2   | 0   | 2   | Latin American 1 | 0.5         | 0.5         |
| EXO1 | chr1 | 241872101 | rs75121323         | G             | A    | 16  | 7   | 9   | East Asian       | 1           | 0           |
| EXO1 | chr1 | 241872128 | rs149663738        | T             | C    | 90  | 22  | 68  | African American | 0.6         | 0.549382716 |
| EXO1 | chr1 | 241872131 | rs4149964          | C             | A    | 153 | 45  | 108 | African American | 0.594771242 | 0.571916784 |
| EXO1 | chr1 | 241872142 | rs4149966          | G             | C    | 639 | 169 | 470 | European         | 0.574334898 | 0.585558911 |
| EXO1 | chr1 | 241872148 | rs201895702        | G             | A    | 6   | 4   | 2   | European         | 1           | 0           |
| EXO1 | chr1 | 241872174 | rs369543845        | A             | T    | 6   | 2   | 4   | Latin American 2 | 0.666666667 | 0.444444444 |
| EXO1 | chr1 | 241872200 | rs750940919        | C             | T    | 5   | 1   | 4   | European         | 0.4         | 0.64        |
| EXO1 | chr1 | 241872212 | rs142556885        | T             | G    | 107 | 40  | 67  | European         | 0.560747664 | 0.601624596 |
| EXO1 | chr1 | 241872235 | chr1_241872235_A_C | A             | C    | 2   | 1   | 1   | AFR              | 1           | 0           |
| EXO1 | chr1 | 241872272 | rs4149967          | G             | C    | 19  | 8   | 11  | European         | 0.947368421 | 0.099722992 |
| EXO1 | chr1 | 241878749 | rs1024525498       | G             | T    | 2   | 0   | 2   | African American | 0.5         | 0.5         |
| EXO1 | chr1 | 241878829 | rs568600790        | A             | G    | 3   | 0   | 3   | South Asian      | 1           | 0           |
| EXO1 | chr1 | 241878841 | chr1_241878841_A_G | A             | G    | 2   | 2   | 0   | Latin American 1 | 1           | 0           |
| EXO1 | chr1 | 241878885 | rs142108522        | G             | A    | 3   | 1   | 2   | African American | 1           | 0           |
| EXO1 | chr1 | 241878901 | rs1425414134       | C             | CCTA | 2   | 0   | 2   | African American | 1           | 0           |
| EXO1 | chr1 | 241878903 | rs145789527        | C             | T    | 6   | 5   | 1   | European         | 0.5         | 0.611111111 |
| EXO1 | chr1 | 241878904 | rs143800705        | G             | A    | 50  | 8   | 42  | European         | 0.42        | 0.6544      |
| EXO1 | chr1 | 241878925 | rs751493652        | C             | T    | 5   | 1   | 4   | Latin American 1 | 0.6         | 0.56        |
| EXO1 | chr1 | 241878964 | rs755710264        | C             | A    | 2   | 1   | 1   | European         | 0.5         | 0.5         |
| EXO1 | chr1 | 241879060 | rs544468931        | T             | G    | 2   | 0   | 2   | AFR              | 0.5         | 0.5         |
| EXO1 | chr1 | 241879062 | rs12122770         | A             | G    | 223 | 87  | 136 | European         | 0.766816143 | 0.389430714 |
| EXO1 | chr1 | 241879096 | rs367935074        | C             | T    | 3   | 1   | 2   | African American | 0.333333333 | 0.666666667 |
| EXO1 | chr1 | 241879135 | rs4149978          | G             | A    | 191 | 76  | 115 | European         | 0.659685864 | 0.502124394 |
| EXO1 | chr1 | 241879152 | rs61736331         | C             | T    | 689 | 130 | 559 | South Asian      | 0.444121916 | 0.685969232 |

|        |      |           |                    |   |   |     |     |     |                  |             |             |
|--------|------|-----------|--------------------|---|---|-----|-----|-----|------------------|-------------|-------------|
| EXO1   | chr1 | 241879152 | chr1_241879152_C_G | C | G | 188 | 61  | 127 | European         | 0.792553191 | 0.355703938 |
| EXO1   | chr1 | 241879163 | rs755546869        | G | C | 2   | 0   | 2   | Latin American 2 | 1           | 0           |
| EXO1   | chr1 | 241879164 | rs200876518        | C | T | 24  | 7   | 17  | European         | 0.833333333 | 0.288194444 |
| EXO1   | chr1 | 241879174 | chr1_241879174_A_G | A | G | 2   | 1   | 1   | European         | 1           | 0           |
| EXO1   | chr1 | 241879179 | rs770050432        | T | C | 2   | 1   | 1   | African American | 0.5         | 0.5         |
| EXO1   | chr1 | 241879203 | rs200010267        | G | A | 6   | 3   | 3   | European         | 0.666666667 | 0.444444444 |
| EXO1   | chr1 | 241879203 | chr1_241879203_G_C | G | C | 3   | 2   | 1   | European         | 0.666666667 | 0.444444444 |
| EXO1   | chr1 | 241879218 | rs751959288        | G | A | 4   | 2   | 2   | European         | 0.75        | 0.375       |
| EXO1   | chr1 | 241879225 | rs781754281        | C | A | 2   | 0   | 2   | South Asian      | 1           | 0           |
| EXO1   | chr1 | 241879237 | rs547661777        | G | A | 8   | 1   | 7   | South Asian      | 0.875       | 0.21875     |
| EXO1   | chr1 | 241879333 | rs753952700        | C | G | 2   | 0   | 2   | European         | 0.5         | 0.5         |
| EXO1   | chr1 | 241882001 | rs370369190        | C | T | 3   | 1   | 2   | European         | 1           | 0           |
| EXO1   | chr1 | 241885327 | rs375362003        | A | G | 5   | 2   | 3   | European         | 0.6         | 0.48        |
| EXO1   | chr1 | 241885339 | chr1_241885339_C_G | C | G | 3   | 1   | 2   | Latin American 2 | 0.666666667 | 0.444444444 |
| EXO1   | chr1 | 241885350 | rs547993650        | C | T | 5   | 0   | 5   | South Asian      | 1           | 0           |
| EXO1   | chr1 | 241885357 | rs921758551        | C | T | 2   | 1   | 1   | African American | 1           | 0           |
| EXO1   | chr1 | 241885378 | rs4150001          | G | A | 402 | 129 | 273 | European         | 0.708955224 | 0.468354744 |
| EXO1   | chr1 | 241885405 | rs753557075        | A | G | 2   | 0   | 2   | Latin American 1 | 1           | 0           |
| EXO1   | chr1 | 241885411 | rs200622305        | C | T | 5   | 0   | 5   | European         | 1           | 0           |
| EXO1   | chr1 | 241885456 | rs748480959        | C | T | 5   | 2   | 3   | African American | 0.4         | 0.64        |
| EXO1   | chr1 | 241889515 | rs752278136        | A | G | 2   | 0   | 2   | South Asian      | 1           | 0           |
| EXO1   | chr1 | 241889539 | rs145975455        | C | T | 51  | 14  | 37  | European         | 0.745098039 | 0.415993849 |
| EXO1   | chr1 | 241889542 | rs1001293843       | A | C | 2   | 0   | 2   | African American | 0.5         | 0.5         |
| EXO1   | chr1 | 241889586 | rs780297678        | G | A | 2   | 1   | 1   | European         | 0.5         | 0.5         |
| PDE11A | chr2 | 177629410 | rs771787260        | G | C | 4   | 0   | 4   | South Asian      | 1           | 0           |
| PDE11A | chr2 | 177629426 | chr2_177629426_G_A | G | A | 2   | 1   | 1   | East Asian       | 1           | 0           |
| PDE11A | chr2 | 177629453 | rs140155138        | G | A | 17  | 6   | 11  | European         | 0.764705882 | 0.359861592 |
| PDE11A | chr2 | 177629466 | rs144881528        | C | G | 5   | 3   | 2   | European         | 1           | 0           |
| PDE11A | chr2 | 177629474 | rs529018398        | C | T | 2   | 0   | 2   | South Asian      | 1           | 0           |
| PDE11A | chr2 | 177629477 | chr2_177629477_T_G | T | G | 504 | 78  | 426 | European         | 0.597222222 | 0.587372449 |
| PDE11A | chr2 | 177629486 | chr2_177629486_A_T | A | T | 2   | 1   | 1   | East Asian       | 0.5         | 0.5         |
| PDE11A | chr2 | 177629498 | chr2_177629498_T_A | T | A | 27  | 5   | 22  | European         | 0.666666667 | 0.524005487 |
| PDE11A | chr2 | 177629501 | rs140291701        | C | A | 2   | 1   | 1   | European         | 0.5         | 0.5         |
| PDE11A | chr2 | 177629531 | rs200504859        | G | A | 6   | 2   | 4   | European         | 0.666666667 | 0.5         |
| PDE11A | chr2 | 177629531 | chr2_177629531_G_T | G | T | 2   | 1   | 1   | European         | 1           | 0           |
| PDE11A | chr2 | 177629547 | rs1390593150       | T | A | 3   | 0   | 3   | South Asian      | 1           | 0           |
| PDE11A | chr2 | 177629556 | rs138134819        | C | T | 53  | 20  | 33  | Latin American 1 | 0.528301887 | 0.558205767 |
| PDE11A | chr2 | 177629562 | rs79400048         | C | T | 52  | 10  | 42  | Latin American 2 | 0.576923077 | 0.577662722 |
| PDE11A | chr2 | 177663872 | rs374942202        | C | A | 81  | 0   | 81  | South Asian      | 0.987654321 | 0.024386526 |
| PDE11A | chr2 | 177663880 | rs74357545         | T | C | 565 | 189 | 376 | European         | 0.787610619 | 0.365209492 |
| PDE11A | chr2 | 177663880 | chr2_177663880_T_G | T | G | 70  | 14  | 56  | AFR              | 0.371428571 | 0.674693878 |
| PDE11A | chr2 | 177663894 | rs371810618        | A | G | 2   | 1   | 1   | European         | 1           | 0           |
| PDE11A | chr2 | 177663913 | chr2_177663913_G_A | G | A | 29  | 6   | 23  | Latin American 2 | 0.344827586 | 0.72294887  |
| PDE11A | chr2 | 177663930 | rs528467210        | C | T | 2   | 1   | 1   | East Asian       | 0.5         | 0.5         |
| PDE11A | chr2 | 177663931 | rs551756249        | G | A | 2   | 1   | 1   | European         | 1           | 0           |
| PDE11A | chr2 | 177663936 | rs79384192         | C | T | 4   | 2   | 2   | European         | 0.75        | 0.375       |

|        |      |           |                    |   |   |    |    |    |                  |             |             |
|--------|------|-----------|--------------------|---|---|----|----|----|------------------|-------------|-------------|
| PDE11A | chr2 | 177663937 | rs773631747        | G | A | 3  | 0  | 3  | European         | 0.666666667 | 0.444444444 |
| PDE11A | chr2 | 177669521 | rs142433460        | T | A | 7  | 4  | 3  | East Asian       | 1           | 0           |
| PDE11A | chr2 | 177669524 | rs911385258        | C | T | 8  | 0  | 8  | South Asian      | 0.875       | 0.21875     |
| PDE11A | chr2 | 177669525 | rs201342035        | G | A | 3  | 1  | 2  | European         | 0.666666667 | 0.444444444 |
| PDE11A | chr2 | 177669537 | rs79903863         | C | T | 3  | 0  | 3  | Latin American 1 | 0.666666667 | 0.444444444 |
| PDE11A | chr2 | 177669542 | rs770658136        | A | G | 2  | 1  | 1  | Latin American 1 | 1           | 0           |
| PDE11A | chr2 | 177669558 | rs75950476         | G | A | 4  | 0  | 4  | South Asian      | 1           | 0           |
| PDE11A | chr2 | 177675484 | rs140269105        | C | T | 51 | 24 | 27 | Latin American 1 | 0.509803922 | 0.567474048 |
| PDE11A | chr2 | 177680835 | rs763032610        | T | C | 2  | 0  | 2  | European         | 1           | 0           |
| PDE11A | chr2 | 177680895 | rs200101345        | G | A | 11 | 3  | 8  | Latin American 1 | 1           | 0           |
| PDE11A | chr2 | 177697353 | rs758078572        | G | A | 2  | 1  | 1  | AFR              | 0.5         | 0.5         |
| PDE11A | chr2 | 177697410 | rs201572288        | A | T | 42 | 17 | 25 | East Asian       | 0.904761905 | 0.176870748 |
| PDE11A | chr2 | 177701144 | rs144340688        | C | T | 4  | 1  | 3  | African American | 0.5         | 0.625       |
| PDE11A | chr2 | 177711833 | rs758968516        | C | T | 3  | 2  | 1  | East Asian       | 1           | 0           |
| PDE11A | chr2 | 177711835 | rs549731107        | G | A | 2  | 0  | 2  | Latin American 2 | 0.5         | 0.5         |
| PDE11A | chr2 | 177711836 | rs74666005         | C | T | 14 | 3  | 11 | European         | 1           | 0           |
| PDE11A | chr2 | 177711851 | rs117534006        | C | T | 5  | 2  | 3  | European         | 0.6         | 0.48        |
| PDE11A | chr2 | 177711878 | rs754995449        | T | C | 2  | 1  | 1  | East Asian       | 1           | 0           |
| PDE11A | chr2 | 177727669 | rs201629965        | C | T | 41 | 13 | 28 | East Asian       | 0.902439024 | 0.182034503 |
| PDE11A | chr2 | 177727687 | rs756945686        | C | T | 2  | 0  | 2  | Latin American 2 | 0.5         | 0.5         |
| PDE11A | chr2 | 177727709 | rs746483172        | G | C | 5  | 2  | 3  | European         | 0.6         | 0.56        |
| PDE11A | chr2 | 177727717 | rs146111360        | G | C | 7  | 3  | 4  | European         | 0.857142857 | 0.244897959 |
| PDE11A | chr2 | 177727725 | rs760731175        | C | T | 2  | 1  | 1  | African American | 0.5         | 0.5         |
| PDE11A | chr2 | 177727726 | rs576232838        | G | A | 2  | 1  | 1  | East Asian       | 1           | 0           |
| PDE11A | chr2 | 177727728 | rs77597060         | T | C | 34 | 11 | 23 | European         | 0.823529412 | 0.314878893 |
| PDE11A | chr2 | 177728037 | rs149955405        | T | C | 3  | 0  | 3  | European         | 1           | 0           |
| PDE11A | chr2 | 177728040 | rs189421632        | T | C | 5  | 3  | 2  | East Asian       | 1           | 0           |
| PDE11A | chr2 | 177728058 | rs775868111        | C | A | 20 | 6  | 14 | Latin American 1 | 0.5         | 0.58        |
| PDE11A | chr2 | 177728067 | rs748751920        | T | C | 3  | 0  | 3  | East Asian       | 1           | 0           |
| PDE11A | chr2 | 177728075 | rs777041963        | C | T | 4  | 3  | 1  | African American | 0.5         | 0.625       |
| PDE11A | chr2 | 177728078 | rs147026038        | A | T | 2  | 1  | 1  | European         | 1           | 0           |
| PDE11A | chr2 | 177728091 | rs373487547        | T | A | 9  | 2  | 7  | European         | 1           | 0           |
| PDE11A | chr2 | 177728103 | rs143303102        | C | T | 3  | 0  | 3  | European         | 0.666666667 | 0.444444444 |
| PDE11A | chr2 | 177728106 | rs376525903        | C | T | 3  | 2  | 1  | European         | 1           | 0           |
| PDE11A | chr2 | 177728136 | rs77934668         | C | T | 99 | 33 | 66 | European         | 0.838383838 | 0.280787675 |
| PDE11A | chr2 | 177769354 | rs78384547         | G | A | 11 | 5  | 6  | European         | 0.909090909 | 0.165289256 |
| PDE11A | chr2 | 177769373 | chr2_177769373_C_T | C | T | 2  | 1  | 1  | East Asian       | 0.5         | 0.5         |
| PDE11A | chr2 | 177816852 | rs1285302796       | C | T | 2  | 0  | 2  | Latin American 2 | 0.5         | 0.5         |
| PDE11A | chr2 | 177816858 | rs149795546        | A | G | 45 | 12 | 33 | European         | 0.666666667 | 0.508641975 |
| PDE11A | chr2 | 177816863 | rs148955609        | T | C | 3  | 1  | 2  | European         | 0.666666667 | 0.444444444 |
| PDE11A | chr2 | 177816908 | rs764684230        | A | G | 2  | 0  | 2  | European         | 1           | 0           |
| PDE11A | chr2 | 177816911 | rs138427178        | A | G | 89 | 28 | 61 | European         | 0.764044944 | 0.398687034 |
| PDE11A | chr2 | 177817861 | chr2_177817861_A_C | A | C | 3  | 1  | 2  | East Asian       | 1           | 0           |
| PDE11A | chr2 | 177817904 | rs1218757395       | C | T | 2  | 1  | 1  | European         | 1           | 0           |
| PDE11A | chr2 | 177820284 | chr2_177820284_T_C | T | C | 2  | 1  | 1  | African American | 0.5         | 0.5         |
| PDE11A | chr2 | 177840257 | rs764949656        | A | C | 3  | 3  | 0  | European         | 1           | 0           |

|        |      |           |                    |   |   |     |     |     |                  |             |             |
|--------|------|-----------|--------------------|---|---|-----|-----|-----|------------------|-------------|-------------|
| PDE11A | chr2 | 177840264 | rs372031081        | C | T | 3   | 1   | 2   | African American | 0.666666667 | 0.444444444 |
| PDE11A | chr2 | 177840265 | rs143543408        | G | A | 5   | 0   | 5   | Latin American 2 | 0.8         | 0.32        |
| PDE11A | chr2 | 177840267 | rs200628959        | G | A | 24  | 8   | 16  | East Asian       | 0.875       | 0.229166667 |
| PDE11A | chr2 | 177840285 | rs148715964        | C | G | 6   | 1   | 5   | African American | 1           | 0           |
| PDE11A | chr2 | 177840328 | rs761976960        | T | C | 5   | 0   | 5   | European         | 1           | 0           |
| PDE11A | chr2 | 177840369 | rs746228686        | A | C | 4   | 1   | 3   | Latin American 2 | 1           | 0           |
| PDE11A | chr2 | 177840370 | rs1277892308       | T | C | 2   | 0   | 2   | European         | 0.5         | 0.5         |
| PDE11A | chr2 | 177875869 | rs142247133        | C | G | 37  | 12  | 25  | African American | 0.648648649 | 0.508400292 |
| PDE11A | chr2 | 177875886 | rs773995449        | G | C | 2   | 0   | 2   | European         | 0.5         | 0.5         |
| PDE11A | chr2 | 177875892 | rs767353102        | A | G | 3   | 1   | 2   | European         | 1           | 0           |
| PDE11A | chr2 | 177875892 | chr2_177875892_A_T | A | T | 3   | 1   | 2   | European         | 1           | 0           |
| PDE11A | chr2 | 177898062 | rs200330914        | G | A | 15  | 4   | 11  | Latin American 1 | 0.666666667 | 0.444444444 |
| PDE11A | chr2 | 177905150 | rs1342634171       | A | G | 2   | 0   | 2   | European         | 1           | 0           |
| PDE11A | chr2 | 177905154 | rs560754146        | C | T | 2   | 0   | 2   | African American | 0.5         | 0.5         |
| PDE11A | chr2 | 178014328 | rs77477862         | C | T | 154 | 56  | 98  | European         | 0.746753247 | 0.407488615 |
| PDE11A | chr2 | 178014337 | rs370184249        | G | C | 2   | 1   | 1   | African American | 1           | 0           |
| PDE11A | chr2 | 178014393 | chr2_178014393_G_A | G | A | 2   | 0   | 2   | European         | 1           | 0           |
| PDE11A | chr2 | 178014439 | rs765054096        | T | C | 6   | 0   | 6   | European         | 1           | 0           |
| PDE11A | chr2 | 178014447 | rs757918045        | T | C | 2   | 0   | 2   | Latin American 1 | 0.5         | 0.5         |
| PDE11A | chr2 | 178071545 | rs78328794         | T | C | 74  | 22  | 52  | European         | 0.837837838 | 0.279401023 |
| PDE11A | chr2 | 178071667 | rs1052271430       | G | T | 2   | 0   | 2   | European         | 0.5         | 0.5         |
| PDE11A | chr2 | 178071702 | rs374953886        | C | T | 3   | 1   | 2   | Latin American 1 | 0.666666667 | 0.444444444 |
| PDE11A | chr2 | 178071706 | rs754977043        | T | G | 2   | 1   | 1   | European         | 1           | 0           |
| PDE11A | chr2 | 178071730 | rs199969326        | G | T | 5   | 1   | 4   | East Asian       | 0.8         | 0.32        |
| PDE11A | chr2 | 178071738 | rs200771593        | C | T | 7   | 1   | 6   | European         | 0.857142857 | 0.244897959 |
| PDE11A | chr2 | 178071743 | chr2_178071743_A_T | A | T | 2   | 1   | 1   | European         | 1           | 0           |
| PDE11A | chr2 | 178071773 | rs78860696         | C | G | 5   | 1   | 4   | European         | 0.8         | 0.32        |
| PDE11A | chr2 | 178071797 | chr2_178071797_T_C | T | C | 2   | 1   | 1   | European         | 1           | 0           |
| PDE11A | chr2 | 178071833 | rs752822096        | C | A | 11  | 0   | 11  | Latin American 1 | 1           | 0           |
| PDE11A | chr2 | 178071833 | chr2_178071833_C_T | C | T | 4   | 2   | 2   | East Asian       | 1           | 0           |
| PDE11A | chr2 | 178071834 | rs77063376         | G | A | 386 | 148 | 238 | East Asian       | 0.930051813 | 0.132204891 |
| PDE11A | chr2 | 178071890 | rs1342533522       | G | A | 2   | 0   | 2   | South Asian      | 1           | 0           |
| PDE11A | chr2 | 178071941 | chr2_178071941_G_C | G | C | 2   | 0   | 2   | Latin American 2 | 0.5         | 0.5         |
| PDE11A | chr2 | 178071945 | rs779068288        | G | T | 2   | 0   | 2   | Latin American 2 | 1           | 0           |
| PDE11A | chr2 | 178071950 | chr2_178071950_G_C | G | C | 2   | 0   | 2   | Latin American 1 | 1           | 0           |
| PDE11A | chr2 | 178071969 | chr2_178071969_G_T | G | T | 2   | 0   | 2   | European         | 1           | 0           |
| PDE11A | chr2 | 178071980 | rs1442555490       | C | T | 2   | 0   | 2   | European         | 1           | 0           |
| PDE11A | chr2 | 178071981 | rs762405282        | G | C | 4   | 0   | 4   | South Asian      | 1           | 0           |
| PDE11A | chr2 | 178072010 | rs1365950504       | G | A | 2   | 1   | 1   | African American | 0.5         | 0.5         |
| PDE11A | chr2 | 178072067 | rs149522660        | C | G | 5   | 1   | 4   | European         | 1           | 0           |
| PDE11A | chr2 | 178072083 | rs772856006        | T | G | 4   | 1   | 3   | African American | 0.75        | 0.375       |
| PDE11A | chr2 | 178072133 | rs201934930        | C | A | 11  | 3   | 8   | East Asian       | 1           | 0           |
| PDE11A | chr2 | 178072209 | rs777448999        | C | T | 37  | 1   | 36  | Latin American 2 | 0.864864865 | 0.233747261 |
| PDE11A | chr2 | 178072283 | rs77972073         | C | G | 95  | 31  | 64  | European         | 0.8         | 0.345263158 |
| PDE11A | chr2 | 178072307 | rs1419449582       | T | C | 2   | 1   | 1   | European         | 1           | 0           |
| PDE11A | chr2 | 178072342 | rs201781409        | C | A | 9   | 4   | 5   | European         | 1           | 0           |

|         |      |           |                        |            |              |     |    |     |                  |             |             |
|---------|------|-----------|------------------------|------------|--------------|-----|----|-----|------------------|-------------|-------------|
| PDE11A  | chr2 | 178072350 | rs765545285            | C          | CGAfrican Ar | 2   | 1  | 1   | European         | 1           | 0           |
| PDE11A  | chr2 | 178072397 | rs201362232            | A          | T            | 4   | 1  | 3   | European         | 1           | 0           |
| PDE11A  | chr2 | 178072410 | rs778584662            | C          | T            | 2   | 0  | 2   | European         | 0.5         | 0.5         |
| TMEM158 | chr3 | 45225155  | rs1386737848           | CGCGGCGGCG | C            | 7   | 0  | 7   | South Asian      | 0.571428571 | 0.571428571 |
| TMEM158 | chr3 | 45225155  | rs757666673            | CGCGGCGGCG | C            | 4   | 1  | 3   | European         | 0.75        | 0.375       |
| TMEM158 | chr3 | 45225170  | rs898811347            | AGCGGCGGCG | A            | 2   | 0  | 2   | European         | 0.5         | 0.5         |
| TMEM158 | chr3 | 45225170  | rs1292105843           | AGCGGCG    | A            | 2   | 2  | 0   | European         | 0.5         | 0.5         |
| TMEM158 | chr3 | 45225170  | rs1239506125           | A          | AGCG         | 20  | 7  | 13  | European         | 0.5         | 0.615       |
| TMEM158 | chr3 | 45225170  | chr3_45225170_AGCG_A   | AGCG       | A            | 9   | 3  | 6   | European         | 1           | 0           |
| TMEM158 | chr3 | 45225170  | chr3_45225170_A_AGCGGC | A          | AGCGGCG      | 2   | 0  | 2   | African American | 0.5         | 0.5         |
| TMEM158 | chr3 | 45225170  | chr3_45225170_A_AGCGGC | A          | AGCGGCGGC    | 2   | 0  | 2   | Latin American 2 | 1           | 0           |
| TMEM158 | chr3 | 45225205  | rs958608517            | C          | A            | 4   | 2  | 2   | European         | 0.5         | 0.625       |
| TMEM158 | chr3 | 45225229  | rs1475438196           | C          | T            | 2   | 1  | 1   | European         | 1           | 0           |
| TMEM158 | chr3 | 45225486  | rs745359034            | G          | A            | 28  | 8  | 20  | European         | 0.964285714 | 0.068877551 |
| TMEM158 | chr3 | 45225495  | rs540882568            | G          | C            | 88  | 36 | 52  | African American | 0.352272727 | 0.736311983 |
| TMEM158 | chr3 | 45225522  | rs1009277676           | GTGGCGGCGG | G            | 23  | 5  | 18  | European         | 0.434782609 | 0.688090737 |
| TMEM158 | chr3 | 45225523  | rs1312236292           | TGGCGGCGGC | T            | 46  | 17 | 29  | South Asian      | 0.347826087 | 0.717391304 |
| TMEM158 | chr3 | 45225523  | rs1227765614           | T          | TGGCGGC      | 2   | 0  | 2   | African American | 0.5         | 0.5         |
| TMEM158 | chr3 | 45225526  | rs1464349858           | CGGCGGCGGC | C            | 15  | 2  | 13  | South Asian      | 0.8         | 0.337777778 |
| TMEM158 | chr3 | 45225536  | chr3_45225536_G_T      | G          | T            | 2   | 0  | 2   | East Asian       | 1           | 0           |
| TMEM158 | chr3 | 45225556  | rs1273128253           | G          | A            | 7   | 2  | 5   | Latin American 2 | 0.714285714 | 0.448979592 |
| TMEM158 | chr3 | 45225621  | rs1236852871           | G          | A            | 2   | 2  | 0   | European         | 1           | 0           |
| TMEM158 | chr3 | 45225666  | rs1215510178           | C          | A            | 2   | 0  | 2   | AFR              | 0.5         | 0.5         |
| TMEM158 | chr3 | 45225685  | rs1470317573           | C          | A            | 2   | 0  | 2   | European         | 1           | 0           |
| TMEM158 | chr3 | 45225690  | chr3_45225690_A_T      | A          | T            | 2   | 0  | 2   | European         | 1           | 0           |
| TMEM158 | chr3 | 45225740  | rs1014160296           | G          | C            | 13  | 2  | 11  | Latin American 2 | 0.692307692 | 0.426035503 |
| TMEM158 | chr3 | 45225756  | rs1467969018           | C          | A            | 2   | 0  | 2   | South Asian      | 1           | 0           |
| TMEM158 | chr3 | 45225810  | rs1200630291           | G          | C            | 3   | 1  | 2   | European         | 1           | 0           |
| TMEM158 | chr3 | 45225811  | rs1476640695           | GCGC       | G            | 5   | 3  | 2   | European         | 1           | 0           |
| TMEM158 | chr3 | 45225811  | rs958104992            | G          | GCGC         | 6   | 0  | 6   | Latin American 2 | 0.833333333 | 0.277777778 |
| TMEM158 | chr3 | 45225837  | rs1257264354           | G          | A            | 2   | 0  | 2   | European         | 0.5         | 0.5         |
| TMEM158 | chr3 | 45225912  | rs1356011494           | G          | A            | 5   | 4  | 1   | East Asian       | 1           | 0           |
| TMEM158 | chr3 | 45225928  | chr3_45225928_T_C      | T          | C            | 2   | 0  | 2   | Latin American 2 | 1           | 0           |
| TMEM158 | chr3 | 45225951  | rs878864068            | G          | C            | 22  | 7  | 15  | East Asian       | 0.818181818 | 0.309917355 |
| TMEM158 | chr3 | 45225956  | chr3_45225956_G_C      | G          | C            | 2   | 0  | 2   | African American | 1           | 0           |
| TMEM158 | chr3 | 45225957  | chr3_45225957_T_G      | T          | G            | 457 | 61 | 396 | European         | 0.557986871 | 0.629124391 |
| TMEM158 | chr3 | 45225958  | chr3_45225958_C_G      | C          | G            | 52  | 8  | 44  | European         | 0.461538462 | 0.654585799 |
| TMEM158 | chr3 | 45225967  | rs894114728            | C          | G            | 2   | 0  | 2   | Latin American 2 | 0.5         | 0.5         |
| TMEM158 | chr3 | 45225973  | chr3_45225973_G_C      | G          | C            | 3   | 0  | 3   | African American | 0.333333333 | 0.666666667 |
| TMEM158 | chr3 | 45225991  | chr3_45225991_A_C      | A          | C            | 65  | 10 | 55  | European         | 0.476923077 | 0.710532544 |
| TMEM158 | chr3 | 45226002  | rs949774187            | A          | C            | 27  | 5  | 22  | European         | 0.444444444 | 0.716049383 |
| ATP13A5 | chr3 | 193275131 | rs114013184            | C          | T            | 44  | 13 | 31  | African American | 0.568181818 | 0.56714876  |
| ATP13A5 | chr3 | 193275141 | rs201331139            | G          | C            | 11  | 4  | 7   | Latin American 1 | 0.727272727 | 0.396694215 |
| ATP13A5 | chr3 | 193275172 | rs755766325            | G          | A            | 2   | 1  | 1   | East Asian       | 1           | 0           |
| ATP13A5 | chr3 | 193275196 | rs575706144            | G          | A            | 2   | 1  | 1   | European         | 1           | 0           |
| ATP13A5 | chr3 | 193275198 | rs200117973            | G          | C            | 12  | 2  | 10  | European         | 0.75        | 0.402777778 |

|         |      |           |              |      |   |     |     |     |                  |             |             |
|---------|------|-----------|--------------|------|---|-----|-----|-----|------------------|-------------|-------------|
| ATP13A5 | chr3 | 193275213 | rs536822723  | C    | G | 15  | 0   | 15  | South Asian      | 1           | 0           |
| ATP13A5 | chr3 | 193275238 | rs565215646  | T    | C | 72  | 30  | 42  | Latin American 1 | 0.625       | 0.533950617 |
| ATP13A5 | chr3 | 193275257 | rs1461567097 | C    | G | 2   | 2   | 0   | Latin American 1 | 1           | 0           |
| ATP13A5 | chr3 | 193276811 | rs762089471  | G    | A | 5   | 1   | 4   | European         | 0.4         | 0.64        |
| ATP13A5 | chr3 | 193279373 | rs765570766  | C    | A | 3   | 1   | 2   | Latin American 2 | 1           | 0           |
| ATP13A5 | chr3 | 193279377 | rs762477750  | G    | A | 4   | 2   | 2   | Latin American 1 | 0.75        | 0.375       |
| ATP13A5 | chr3 | 193279410 | rs1482313543 | A    | T | 3   | 1   | 2   | African American | 0.666666667 | 0.444444444 |
| ATP13A5 | chr3 | 193279415 | rs144724475  | G    | T | 3   | 1   | 2   | European         | 1           | 0           |
| ATP13A5 | chr3 | 193279422 | rs1244361447 | C    | A | 3   | 2   | 1   | European         | 1           | 0           |
| ATP13A5 | chr3 | 193284919 | rs375097758  | G    | A | 2   | 0   | 2   | African American | 0.5         | 0.5         |
| ATP13A5 | chr3 | 193284934 | rs764104661  | C    | T | 2   | 0   | 2   | European         | 0.5         | 0.5         |
| ATP13A5 | chr3 | 193284983 | rs6787746    | T    | C | 225 | 74  | 151 | African American | 0.564444444 | 0.574775309 |
| ATP13A5 | chr3 | 193285017 | rs760237068  | A    | T | 3   | 0   | 3   | East Asian       | 1           | 0           |
| ATP13A5 | chr3 | 193285095 | rs145171636  | T    | G | 123 | 48  | 75  | African American | 0.479674797 | 0.640491771 |
| ATP13A5 | chr3 | 193289924 | rs149431762  | A    | T | 16  | 3   | 13  | European         | 0.9375      | 0.1171875   |
| ATP13A5 | chr3 | 193289943 | rs191987914  | T    | A | 4   | 1   | 3   | East Asian       | 0.75        | 0.375       |
| ATP13A5 | chr3 | 193289944 | rs182661663  | C    | G | 14  | 2   | 12  | African American | 0.928571429 | 0.132653061 |
| ATP13A5 | chr3 | 193289988 | rs766248821  | G    | C | 7   | 1   | 6   | Latin American 1 | 1           | 0           |
| ATP13A5 | chr3 | 193290011 | rs538741347  | C    | T | 2   | 0   | 2   | African American | 1           | 0           |
| ATP13A5 | chr3 | 193299167 | rs143912053  | G    | T | 242 | 76  | 166 | African American | 0.524793388 | 0.596646404 |
| ATP13A5 | chr3 | 193301249 | rs200528703  | C    | T | 4   | 3   | 1   | European         | 1           | 0           |
| ATP13A5 | chr3 | 193301257 | rs147279605  | G    | A | 2   | 2   | 0   | European         | 1           | 0           |
| ATP13A5 | chr3 | 193301279 | rs140697178  | A    | C | 2   | 0   | 2   | European         | 1           | 0           |
| ATP13A5 | chr3 | 193301288 | rs545966151  | C    | T | 11  | 3   | 8   | Latin American 1 | 0.909090909 | 0.165289256 |
| ATP13A5 | chr3 | 193301290 | rs778021933  | A    | C | 6   | 1   | 5   | African American | 0.5         | 0.5         |
| ATP13A5 | chr3 | 193301293 | rs553813639  | G    | C | 2   | 1   | 1   | European         | 0.5         | 0.5         |
| ATP13A5 | chr3 | 193305601 | rs760012300  | G    | A | 4   | 2   | 2   | European         | 1           | 0           |
| ATP13A5 | chr3 | 193305649 | rs752423970  | G    | T | 2   | 1   | 1   | Latin American 2 | 0.5         | 0.5         |
| ATP13A5 | chr3 | 193305658 | rs149959340  | G    | A | 5   | 2   | 3   | Latin American 2 | 0.4         | 0.72        |
| ATP13A5 | chr3 | 193307359 | rs1282623128 | C    | G | 2   | 0   | 2   | European         | 1           | 0           |
| ATP13A5 | chr3 | 193310663 | rs372746599  | G    | T | 5   | 2   | 3   | European         | 0.8         | 0.32        |
| ATP13A5 | chr3 | 193311887 | rs760725199  | A    | G | 10  | 0   | 10  | South Asian      | 1           | 0           |
| ATP13A5 | chr3 | 193311904 | rs368258320  | C    | A | 2   | 1   | 1   | European         | 1           | 0           |
| ATP13A5 | chr3 | 193311926 | rs145000399  | T    | C | 61  | 18  | 43  | European         | 0.704918033 | 0.457403924 |
| ATP13A5 | chr3 | 193311936 | rs115289476  | G    | C | 76  | 27  | 49  | African American | 0.565789474 | 0.595221607 |
| ATP13A5 | chr3 | 193314110 | rs79270190   | C    | T | 37  | 10  | 27  | European         | 0.540540541 | 0.57706355  |
| ATP13A5 | chr3 | 193314128 | rs757084912  | C    | G | 2   | 0   | 2   | South Asian      | 1           | 0           |
| ATP13A5 | chr3 | 193314140 | rs1372027176 | G    | C | 3   | 1   | 2   | East Asian       | 1           | 0           |
| ATP13A5 | chr3 | 193314996 | rs150934081  | G    | A | 75  | 22  | 53  | African American | 0.453333333 | 0.631822222 |
| ATP13A5 | chr3 | 193315043 | rs74478656   | C    | T | 399 | 146 | 253 | European         | 0.731829574 | 0.434683199 |
| ATP13A5 | chr3 | 193315044 | rs150495266  | G    | A | 19  | 6   | 13  | European         | 0.684210526 | 0.48199446  |
| ATP13A5 | chr3 | 193315049 | rs187199317  | T    | A | 22  | 3   | 19  | Latin American 2 | 0.727272727 | 0.396694215 |
| ATP13A5 | chr3 | 193315056 | rs750585678  | TGAG | T | 14  | 10  | 4   | Latin American 1 | 0.5         | 0.673469388 |
| ATP13A5 | chr3 | 193319022 | rs144655859  | C    | T | 2   | 2   | 0   | African American | 0.5         | 0.5         |
| ATP13A5 | chr3 | 193319057 | rs370727916  | C    | T | 2   | 0   | 2   | European         | 0.5         | 0.5         |
| ATP13A5 | chr3 | 193319058 | rs201429023  | G    | A | 6   | 3   | 3   | European         | 0.5         | 0.666666667 |

|         |      |           |                    |   |   |     |     |     |                  |             |             |
|---------|------|-----------|--------------------|---|---|-----|-----|-----|------------------|-------------|-------------|
| ATP13A5 | chr3 | 193319075 | rs763104139        | T | C | 6   | 3   | 3   | European         | 1           | 0           |
| ATP13A5 | chr3 | 193319105 | rs74371245         | G | A | 148 | 57  | 91  | European         | 0.864864865 | 0.246895544 |
| ATP13A5 | chr3 | 193321743 | rs149246060        | T | G | 5   | 4   | 1   | East Asian       | 1           | 0           |
| ATP13A5 | chr3 | 193321755 | chr3_193321755_G_C | G | C | 2   | 0   | 2   | South Asian      | 1           | 0           |
| ATP13A5 | chr3 | 193321765 | rs143477252        | C | T | 28  | 11  | 17  | African American | 0.5         | 0.56122449  |
| ATP13A5 | chr3 | 193321787 | rs541864223        | G | C | 3   | 0   | 3   | South Asian      | 1           | 0           |
| ATP13A5 | chr3 | 193321800 | rs139155353        | G | A | 9   | 6   | 3   | European         | 1           | 0           |
| ATP13A5 | chr3 | 193322534 | rs199624603        | G | A | 6   | 1   | 5   | European         | 0.5         | 0.666666667 |
| ATP13A5 | chr3 | 193322559 | rs780295022        | T | C | 3   | 2   | 1   | European         | 1           | 0           |
| ATP13A5 | chr3 | 193324929 | rs140058809        | T | C | 45  | 20  | 25  | East Asian       | 1           | 0           |
| ATP13A5 | chr3 | 193324943 | rs759042086        | C | G | 86  | 5   | 81  | European         | 1           | 0           |
| ATP13A5 | chr3 | 193324944 | rs767260419        | T | G | 85  | 5   | 80  | European         | 1           | 0           |
| ATP13A5 | chr3 | 193324956 | rs778615820        | C | T | 2   | 1   | 1   | East Asian       | 1           | 0           |
| ATP13A5 | chr3 | 193331133 | rs141636662        | C | T | 13  | 5   | 8   | African American | 0.538461538 | 0.556213018 |
| ATP13A5 | chr3 | 193331152 | rs149638612        | C | T | 2   | 0   | 2   | African American | 1           | 0           |
| ATP13A5 | chr3 | 193331156 | rs1243589122       | C | A | 6   | 3   | 3   | East Asian       | 1           | 0           |
| ATP13A5 | chr3 | 193331185 | rs75032809         | A | C | 99  | 33  | 66  | East Asian       | 0.888888889 | 0.20140802  |
| ATP13A5 | chr3 | 193331239 | rs1243618007       | C | A | 2   | 1   | 1   | European         | 1           | 0           |
| ATP13A5 | chr3 | 193331257 | rs372215216        | G | T | 3   | 1   | 2   | African American | 1           | 0           |
| ATP13A5 | chr3 | 193331266 | rs138137992        | C | T | 9   | 3   | 6   | African American | 0.777777778 | 0.37037037  |
| ATP13A5 | chr3 | 193331271 | rs767801283        | A | T | 5   | 2   | 3   | Latin American 1 | 0.8         | 0.32        |
| ATP13A5 | chr3 | 193331293 | rs1360478948       | C | A | 2   | 0   | 2   | European         | 1           | 0           |
| ATP13A5 | chr3 | 193333763 | rs780118780        | T | C | 5   | 1   | 4   | Latin American 2 | 0.4         | 0.72        |
| ATP13A5 | chr3 | 193333772 | rs1183145231       | A | G | 3   | 0   | 3   | African American | 0.666666667 | 0.444444444 |
| ATP13A5 | chr3 | 193333778 | rs376836714        | T | C | 2   | 1   | 1   | Latin American 1 | 1           | 0           |
| ATP13A5 | chr3 | 193333787 | chr3_193333787_C_A | C | A | 2   | 1   | 1   | European         | 1           | 0           |
| ATP13A5 | chr3 | 193333805 | rs1468847477       | G | A | 2   | 1   | 1   | Latin American 2 | 1           | 0           |
| ATP13A5 | chr3 | 193333815 | rs147789936        | C | T | 4   | 0   | 4   | South Asian      | 1           | 0           |
| ATP13A5 | chr3 | 193333818 | rs754945295        | T | C | 2   | 2   | 0   | East Asian       | 1           | 0           |
| ATP13A5 | chr3 | 193333835 | rs138727987        | C | T | 75  | 23  | 52  | European         | 0.746666667 | 0.424888889 |
| ATP13A5 | chr3 | 193333859 | rs776857987        | C | T | 2   | 0   | 2   | African American | 0.5         | 0.5         |
| ATP13A5 | chr3 | 193334941 | rs370567338        | C | T | 5   | 2   | 3   | European         | 1           | 0           |
| ATP13A5 | chr3 | 193334949 | rs372618344        | C | T | 5   | 1   | 4   | African American | 0.4         | 0.64        |
| ATP13A5 | chr3 | 193335013 | rs75931190         | T | C | 554 | 160 | 394 | African American | 0.559566787 | 0.59220764  |
| ATP13A5 | chr3 | 193335040 | rs201429261        | T | C | 4   | 2   | 2   | European         | 0.75        | 0.375       |
| ATP13A5 | chr3 | 193335048 | rs771278274        | A | T | 3   | 2   | 1   | European         | 0.666666667 | 0.444444444 |
| ATP13A5 | chr3 | 193335076 | rs566822422        | T | C | 7   | 0   | 7   | South Asian      | 1           | 0           |
| ATP13A5 | chr3 | 193343951 | rs371940596        | C | T | 4   | 2   | 2   | European         | 0.5         | 0.625       |
| ATP13A5 | chr3 | 193343957 | rs779330125        | T | C | 2   | 1   | 1   | Latin American 2 | 1           | 0           |
| ATP13A5 | chr3 | 193343983 | rs144965247        | G | A | 15  | 3   | 12  | African American | 0.8         | 0.337777778 |
| ATP13A5 | chr3 | 193343984 | rs946523298        | G | A | 2   | 0   | 2   | European         | 0.5         | 0.5         |
| ATP13A5 | chr3 | 193344020 | rs147928745        | C | T | 8   | 1   | 7   | African American | 0.375       | 0.65625     |
| ATP13A5 | chr3 | 193344034 | rs148990571        | C | T | 10  | 6   | 4   | African American | 0.7         | 0.46        |
| ATP13A5 | chr3 | 193344035 | rs372925735        | G | A | 3   | 0   | 3   | African American | 0.333333333 | 0.666666667 |
| ATP13A5 | chr3 | 193345015 | rs1280152650       | C | T | 2   | 2   | 0   | African American | 0.5         | 0.5         |
| ATP13A5 | chr3 | 193345062 | rs1272126165       | A | G | 2   | 1   | 1   | European         | 1           | 0           |

|         |      |           |                    |         |   |     |     |     |                  |             |             |
|---------|------|-----------|--------------------|---------|---|-----|-----|-----|------------------|-------------|-------------|
| ATP13A5 | chr3 | 193351107 | rs770956404        | G       | C | 3   | 1   | 2   | African American | 0.666666667 | 0.444444444 |
| ATP13A5 | chr3 | 193351133 | chr3_193351133_T_G | T       | G | 2   | 1   | 1   | European         | 1           | 0           |
| ATP13A5 | chr3 | 193351146 | rs750007232        | T       | C | 9   | 3   | 6   | East Asian       | 1           | 0           |
| ATP13A5 | chr3 | 193351187 | rs1330884579       | G       | T | 4   | 2   | 2   | Latin American 1 | 1           | 0           |
| ATP13A5 | chr3 | 193354135 | rs374609371        | C       | G | 2   | 1   | 1   | African American | 1           | 0           |
| ATP13A5 | chr3 | 193354175 | rs141850010        | G       | T | 68  | 30  | 38  | African American | 0.705882353 | 0.430795848 |
| ATP13A5 | chr3 | 193362429 | rs138006161        | A       | C | 53  | 1   | 52  | South Asian      | 1           | 0           |
| ATP13A5 | chr3 | 193362583 | rs149501118        | G       | A | 8   | 2   | 6   | African American | 0.75        | 0.375       |
| ATP13A5 | chr3 | 193363279 | rs776540812        | C       | T | 2   | 1   | 1   | East Asian       | 0.5         | 0.5         |
| ATP13A5 | chr3 | 193363301 | rs201387347        | C       | T | 210 | 80  | 130 | European         | 0.642857143 | 0.512290249 |
| ATP13A5 | chr3 | 193363306 | rs192753632        | T       | C | 19  | 7   | 12  | African American | 0.421052632 | 0.64265928  |
| ATP13A5 | chr3 | 193363316 | rs368981593        | C       | T | 8   | 5   | 3   | European         | 1           | 0           |
| ATP13A5 | chr3 | 193363360 | rs778680911        | C       | T | 3   | 3   | 0   | European         | 0.666666667 | 0.444444444 |
| ATP13A5 | chr3 | 193363380 | chr3_193363380_G_C | G       | C | 2   | 0   | 2   | European         | 1           | 0           |
| ATP13A5 | chr3 | 193363380 | chr3_193363380_G_T | G       | T | 2   | 0   | 2   | European         | 1           | 0           |
| ATP13A5 | chr3 | 193364162 | rs560977025        | GCCCACA | G | 218 | 85  | 133 | Latin American 1 | 0.54587156  | 0.577308307 |
| ATP13A5 | chr3 | 193364187 | rs149162434        | A       | G | 16  | 3   | 13  | African American | 0.625       | 0.5546875   |
| ATP13A5 | chr3 | 193364220 | rs76759970         | G       | T | 69  | 21  | 48  | East Asian       | 0.913043478 | 0.15879017  |
| ATP13A5 | chr3 | 193364223 | rs146780815        | C       | T | 10  | 1   | 9   | African American | 0.8         | 0.34        |
| ATP13A5 | chr3 | 193364249 | rs200695101        | C       | T | 19  | 5   | 14  | Latin American 1 | 0.473684211 | 0.614958449 |
| ATP13A5 | chr3 | 193364250 | rs148527761        | G       | A | 2   | 0   | 2   | African American | 1           | 0           |
| ATP13A5 | chr3 | 193364264 | rs78621247         | C       | T | 2   | 1   | 1   | East Asian       | 0.5         | 0.5         |
| ATP13A5 | chr3 | 193364265 | rs757435375        | G       | A | 2   | 1   | 1   | Latin American 2 | 1           | 0           |
| ATP13A5 | chr3 | 193364268 | rs750506473        | A       | G | 3   | 1   | 2   | African American | 1           | 0           |
| ATP13A5 | chr3 | 193378685 | rs372420123        | T       | C | 3   | 0   | 3   | East Asian       | 0.333333333 | 0.666666667 |
| TREM2   | chr6 | 41158768  | rs368921728        | G       | A | 15  | 5   | 10  | Latin American 1 | 0.866666667 | 0.24        |
| TREM2   | chr6 | 41158881  | rs138355759        | G       | A | 42  | 2   | 40  | South Asian      | 0.69047619  | 0.477324263 |
| TREM2   | chr6 | 41158975  | rs150277350        | C       | T | 17  | 5   | 12  | East Asian       | 0.529411765 | 0.615916955 |
| TREM2   | chr6 | 41158996  | chr6_41158996_T_C  | T       | C | 2   | 2   | 0   | Latin American 1 | 1           | 0           |
| TREM2   | chr6 | 41159016  | chr6_41159016_A_G  | A       | G | 2   | 0   | 2   | East Asian       | 1           | 0           |
| TREM2   | chr6 | 41159039  | rs138788407        | G       | C | 6   | 4   | 2   | African American | 0.833333333 | 0.277777778 |
| TREM2   | chr6 | 41159063  | rs371702633        | G       | C | 5   | 3   | 2   | European         | 1           | 0           |
| TREM2   | chr6 | 41159805  | rs2234255          | G       | A | 449 | 133 | 316 | Latin American 2 | 0.503340757 | 0.647576153 |
| TREM2   | chr6 | 41159823  | rs79011726         | C       | T | 25  | 10  | 15  | Latin American 1 | 0.52        | 0.624       |
| TREM2   | chr6 | 41159865  | rs758428150        | C       | T | 2   | 1   | 1   | African American | 1           | 0           |
| TREM2   | chr6 | 41159867  | rs149622783        | C       | T | 12  | 4   | 8   | European         | 0.75        | 0.402777778 |
| TREM2   | chr6 | 41159868  | rs772641807        | G       | A | 8   | 4   | 4   | European         | 0.625       | 0.53125     |
| TREM2   | chr6 | 41159882  | rs762052858        | T       | C | 4   | 2   | 2   | European         | 1           | 0           |
| TREM2   | chr6 | 41161340  | rs145080901        | G       | A | 9   | 6   | 3   | European         | 0.888888889 | 0.197530864 |
| TREM2   | chr6 | 41161347  | chr6_41161347_G_A  | G       | A | 2   | 0   | 2   | East Asian       | 1           | 0           |
| TREM2   | chr6 | 41161350  | rs1173985669       | G       | T | 2   | 2   | 0   | Latin American 2 | 1           | 0           |
| TREM2   | chr6 | 41161362  | rs147564421        | G       | A | 20  | 7   | 13  | Latin American 1 | 0.6         | 0.585       |
| TREM2   | chr6 | 41161367  | chr6_41161367_G_A  | G       | A | 24  | 10  | 14  | African American | 0.833333333 | 0.295138889 |
| TREM2   | chr6 | 41161450  | rs753372932        | G       | C | 2   | 0   | 2   | European         | 1           | 0           |
| TREM2   | chr6 | 41161454  | chr6_41161454_T_C  | T       | C | 2   | 0   | 2   | AFR              | 1           | 0           |
| TREM2   | chr6 | 41161457  | rs201258663        | G       | A | 4   | 4   | 0   | African American | 0.5         | 0.5         |

|       |      |           |                       |   |      |     |     |     |                  |             |             |
|-------|------|-----------|-----------------------|---|------|-----|-----|-----|------------------|-------------|-------------|
| TREM2 | chr6 | 41161470  | rs201258314           | G | A    | 9   | 6   | 3   | European         | 1           | 0           |
| TREM2 | chr6 | 41161499  | rs374851046           | C | T    | 2   | 1   | 1   | European         | 0.5         | 0.5         |
| TREM2 | chr6 | 41161514  | rs75932628            | C | T    | 274 | 135 | 139 | European         | 0.824817518 | 0.310432095 |
| TREM2 | chr6 | 41161537  | rs200392967           | G | C    | 4   | 1   | 3   | European         | 1           | 0           |
| TREM2 | chr6 | 41161562  | rs746216516           | G | A    | 2   | 1   | 1   | European         | 1           | 0           |
| TREM2 | chr6 | 41161571  | rs2234252             | G | A    | 40  | 12  | 28  | Latin American 1 | 0.8         | 0.33625     |
| TREM2 | chr6 | 41161575  | rs768745050           | C | T    | 8   | 5   | 3   | East Asian       | 0.375       | 0.71875     |
| TREM2 | chr6 | 41161599  | rs764738032           | G | A    | 2   | 0   | 2   | European         | 1           | 0           |
| TREM2 | chr6 | 41163069  | rs146485698           | C | T    | 7   | 3   | 4   | African American | 0.428571429 | 0.734693878 |
| ULBP2 | chr6 | 149942088 | rs778314792           | G | A    | 12  | 6   | 6   | Latin American 1 | 0.666666667 | 0.444444444 |
| ULBP2 | chr6 | 149942089 | rs752047411           | C | T    | 13  | 6   | 7   | Latin American 1 | 0.615384615 | 0.520710059 |
| ULBP2 | chr6 | 149942095 | rs748819035           | A | G    | 12  | 6   | 6   | Latin American 1 | 0.666666667 | 0.444444444 |
| ULBP2 | chr6 | 149942142 | chr6_149942142_C_G    | C | G    | 2   | 0   | 2   | European         | 0.5         | 0.5         |
| ULBP2 | chr6 | 149942151 | rs200438471           | C | G    | 131 | 11  | 120 | European         | 0.984732824 | 0.030184721 |
| ULBP2 | chr6 | 149945316 | rs780827241           | C | G    | 6   | 2   | 4   | European         | 0.666666667 | 0.5         |
| ULBP2 | chr6 | 149945317 | rs368577099           | T | G    | 358 | 106 | 252 | African American | 0.594972067 | 0.557129927 |
| ULBP2 | chr6 | 149945329 | rs200418864           | G | T    | 6   | 0   | 6   | South Asian      | 1           | 0           |
| ULBP2 | chr6 | 149945338 | rs149841016           | G | A    | 7   | 3   | 4   | Latin American 1 | 0.428571429 | 0.693877551 |
| ULBP2 | chr6 | 149945356 | rs146890769           | C | T    | 38  | 8   | 30  | AFR              | 0.368421053 | 0.680055402 |
| ULBP2 | chr6 | 149945365 | rs1213051988          | C | T    | 2   | 0   | 2   | European         | 0.5         | 0.5         |
| ULBP2 | chr6 | 149945372 | rs773447595           | G | A    | 2   | 1   | 1   | African American | 0.5         | 0.5         |
| ULBP2 | chr6 | 149945375 | rs371185580           | C | T    | 7   | 1   | 6   | Latin American 1 | 0.571428571 | 0.612244898 |
| ULBP2 | chr6 | 149945377 | rs367657698           | G | A    | 89  | 30  | 59  | Latin American 1 | 0.426966292 | 0.648150486 |
| ULBP2 | chr6 | 149945388 | rs1380842263          | G | C    | 2   | 1   | 1   | Latin American 2 | 1           | 0           |
| ULBP2 | chr6 | 149945390 | rs767264674           | T | A    | 9   | 2   | 7   | European         | 1           | 0           |
| ULBP2 | chr6 | 149945402 | rs1342978408          | C | G    | 2   | 1   | 1   | East Asian       | 0.5         | 0.5         |
| ULBP2 | chr6 | 149945423 | rs137925921           | G | A    | 31  | 10  | 21  | African American | 0.548387097 | 0.613943809 |
| ULBP2 | chr6 | 149945426 | rs753783039           | A | G    | 79  | 33  | 46  | East Asian       | 0.848101266 | 0.2669444   |
| ULBP2 | chr6 | 149945432 | rs755018486           | C | G    | 2   | 0   | 2   | East Asian       | 0.5         | 0.5         |
| ULBP2 | chr6 | 149945443 | rs181078670           | G | A    | 169 | 52  | 117 | African American | 0.568047337 | 0.587164315 |
| ULBP2 | chr6 | 149945449 | rs760013957           | C | A    | 39  | 16  | 23  | European         | 0.871794872 | 0.228796844 |
| ULBP2 | chr6 | 149945471 | rs750021812           | T | G    | 62  | 15  | 47  | African American | 0.596774194 | 0.555671176 |
| ULBP2 | chr6 | 149945477 | rs760272835           | C | T    | 5   | 0   | 5   | Latin American 2 | 0.4         | 0.64        |
| ULBP2 | chr6 | 149945504 | rs143300988           | T | C    | 3   | 0   | 3   | African American | 0.333333333 | 0.666666667 |
| ULBP2 | chr6 | 149945537 | rs565934851           | T | C    | 2   | 0   | 2   | South Asian      | 1           | 0           |
| ULBP2 | chr6 | 149945540 | rs144855877           | G | T    | 494 | 134 | 360 | African American | 0.362348178 | 0.763592257 |
| ULBP2 | chr6 | 149945561 | rs568267792           | A | T    | 7   | 3   | 4   | East Asian       | 1           | 0           |
| ULBP2 | chr6 | 149945564 | rs78868048            | C | T    | 171 | 54  | 117 | African American | 0.567251462 | 0.590061899 |
| ULBP2 | chr6 | 149945567 | rs1204846388          | C | A    | 3   | 1   | 2   | European         | 1           | 0           |
| ULBP2 | chr6 | 149946384 | rs200650236           | T | C    | 26  | 8   | 18  | African American | 0.5         | 0.594674556 |
| ULBP2 | chr6 | 149946426 | chr6_149946426_G_GTTT | G | GTTT | 2   | 0   | 2   | Latin American 1 | 1           | 0           |
| ULBP2 | chr6 | 149946437 | chr6_149946437_T_G    | T | G    | 2   | 0   | 2   | Latin American 1 | 1           | 0           |
| ULBP2 | chr6 | 149946449 | rs759023936           | T | A    | 7   | 3   | 4   | European         | 0.714285714 | 0.408163265 |
| ULBP2 | chr6 | 149946452 | rs147343823           | G | A    | 2   | 1   | 1   | African American | 0.5         | 0.5         |
| ULBP2 | chr6 | 149946461 | rs768293463           | A | T    | 14  | 6   | 8   | Latin American 1 | 1           | 0           |
| ULBP2 | chr6 | 149946480 | rs753969858           | C | T    | 5   | 4   | 1   | European         | 1           | 0           |

|         |      |           |                    |   |   |     |    |     |                  |             |             |
|---------|------|-----------|--------------------|---|---|-----|----|-----|------------------|-------------|-------------|
| ULBP2   | chr6 | 149946491 | rs534675558        | A | G | 4   | 0  | 4   | African American | 1           | 0           |
| ULBP2   | chr6 | 149946501 | rs139052742        | C | T | 65  | 24 | 41  | Latin American 1 | 0.569230769 | 0.565680473 |
| ULBP2   | chr6 | 149946507 | chr6_149946507_A_C | A | C | 2   | 2  | 0   | European         | 1           | 0           |
| ULBP2   | chr6 | 149946535 | rs192707406        | G | T | 10  | 3  | 7   | South Asian      | 0.4         | 0.7         |
| ULBP2   | chr6 | 149946552 | rs537356181        | T | A | 3   | 0  | 3   | South Asian      | 0.666666667 | 0.444444444 |
| ULBP2   | chr6 | 149946575 | rs557480807        | T | A | 5   | 2  | 3   | African American | 0.4         | 0.64        |
| ULBP2   | chr6 | 149946624 | rs1266271221       | T | C | 2   | 2  | 0   | African American | 0.5         | 0.5         |
| ULBP2   | chr6 | 149946641 | rs148767984        | C | A | 11  | 2  | 9   | Latin American 1 | 0.545454545 | 0.495867769 |
| ULBP2   | chr6 | 149947332 | rs1162716831       | T | A | 2   | 1  | 1   | European         | 1           | 0           |
| ULBP2   | chr6 | 149947379 | rs1259510402       | C | T | 282 | 85 | 197 | African American | 0.585106383 | 0.558120819 |
| ULBP2   | chr6 | 149947389 | rs1198627148       | T | G | 2   | 0  | 2   | European         | 1           | 0           |
| ULBP2   | chr6 | 149947424 | chr6_149947424_A_T | A | T | 4   | 2  | 2   | Latin American 1 | 0.75        | 0.375       |
| RASA4CP | chr7 | 44029458  | rs1015598835       | G | A | 3   | 0  | 3   | Latin American 1 | 0.666666667 | 0.444444444 |
| RASA4CP | chr7 | 44029463  | rs1190899146       | C | A | 2   | 0  | 2   | Latin American 1 | 0.5         | 0.5         |
| RASA4CP | chr7 | 44029633  | rs747732387        | T | G | 2   | 1  | 1   | Latin American 2 | 1           | 0           |
| RASA4CP | chr7 | 44029636  | rs1389461689       | G | A | 3   | 1  | 2   | East Asian       | 1           | 0           |
| RASA4CP | chr7 | 44030902  | rs1246313173       | C | T | 3   | 0  | 3   | East Asian       | 1           | 0           |
| RASA4CP | chr7 | 44034170  | rs746498395        | T | A | 3   | 2  | 1   | East Asian       | 1           | 0           |
| RASA4CP | chr7 | 44034316  | rs1474901219       | A | C | 2   | 0  | 2   | European         | 0.5         | 0.5         |
| RASA4CP | chr7 | 44036664  | rs202203362        | C | T | 121 | 35 | 86  | European         | 0.454545455 | 0.694078273 |
| RASA4CP | chr7 | 44036665  | rs535867462        | C | T | 41  | 14 | 27  | African American | 0.512195122 | 0.625817965 |
| RASA4CP | chr7 | 44036668  | rs753275741        | G | A | 156 | 22 | 134 | European         | 0.935897436 | 0.123109796 |
| RASA4CP | chr7 | 44036816  | rs776338291        | C | T | 2   | 2  | 0   | European         | 1           | 0           |
| RASA4CP | chr7 | 44038983  | rs750857927        | G | A | 10  | 4  | 6   | European         | 0.6         | 0.48        |
| RASA4CP | chr7 | 44038988  | rs531889388        | G | C | 37  | 18 | 19  | European         | 0.837837838 | 0.287801315 |
| RASA4CP | chr7 | 44038989  | chr7_44038989_G_A  | G | A | 2   | 2  | 0   | European         | 1           | 0           |
| RASA4CP | chr7 | 44039512  | rs769466220        | C | G | 7   | 1  | 6   | Latin American 1 | 1           | 0           |
| RASA4CP | chr7 | 44039513  | chr7_44039513_G_A  | G | A | 3   | 1  | 2   | Latin American 1 | 1           | 0           |
| RASA4CP | chr7 | 44039514  | rs774922200        | C | T | 2   | 1  | 1   | European         | 1           | 0           |
| RASA4CP | chr7 | 44039665  | rs561383481        | T | C | 231 | 75 | 156 | African American | 0.497835498 | 0.626899796 |
| RASA4CP | chr7 | 44039674  | rs1400748461       | C | T | 2   | 2  | 0   | African American | 1           | 0           |
| RASA4CP | chr7 | 44039677  | rs1228782778       | C | T | 3   | 0  | 3   | South Asian      | 1           | 0           |
| RASA4CP | chr7 | 44039678  | rs777035110        | A | G | 5   | 0  | 5   | South Asian      | 1           | 0           |
| RASA4CP | chr7 | 44039679  | rs531700145        | G | T | 23  | 5  | 18  | Latin American 1 | 0.52173913  | 0.536862004 |
| GPC2    | chr7 | 100170238 | rs1229985251       | G | A | 2   | 2  | 0   | European         | 0.5         | 0.5         |
| GPC2    | chr7 | 100170271 | rs201638394        | T | A | 27  | 5  | 22  | European         | 0.925925926 | 0.137174211 |
| GPC2    | chr7 | 100170306 | rs1048208880       | C | T | 2   | 0  | 2   | African American | 0.5         | 0.5         |
| GPC2    | chr7 | 100170310 | rs377442808        | C | G | 12  | 3  | 9   | AFR              | 0.416666667 | 0.680555556 |
| GPC2    | chr7 | 100170310 | chr7_100170310_C_T | C | T | 2   | 0  | 2   | Latin American 1 | 1           | 0           |
| GPC2    | chr7 | 100170321 | rs753178254        | C | T | 2   | 0  | 2   | Latin American 2 | 0.5         | 0.5         |
| GPC2    | chr7 | 100170322 | rs372657078        | G | A | 4   | 1  | 3   | European         | 0.75        | 0.375       |
| GPC2    | chr7 | 100170336 | rs754257278        | C | T | 4   | 2  | 2   | European         | 0.5         | 0.625       |
| GPC2    | chr7 | 100170385 | rs776706956        | G | A | 2   | 0  | 2   | European         | 0.5         | 0.5         |
| GPC2    | chr7 | 100170420 | rs760655243        | A | C | 5   | 0  | 5   | European         | 0.4         | 0.64        |
| GPC2    | chr7 | 100170474 | rs199992794        | G | A | 15  | 8  | 7   | East Asian       | 1           | 0           |
| GPC2    | chr7 | 100170483 | rs146672512        | T | C | 2   | 1  | 1   | European         | 1           | 0           |

|      |      |           |                    |   |   |     |    |     |                  |             |             |
|------|------|-----------|--------------------|---|---|-----|----|-----|------------------|-------------|-------------|
| GPC2 | chr7 | 100171265 | chr7_100171265_G_T | G | T | 3   | 2  | 1   | European         | 1           | 0           |
| GPC2 | chr7 | 100171301 | chr7_100171301_T_G | T | G | 594 | 90 | 504 | European         | 0.535353535 | 0.617006201 |
| GPC2 | chr7 | 100171320 | rs766096655        | G | T | 2   | 0  | 2   | Latin American 1 | 0.5         | 0.5         |
| GPC2 | chr7 | 100171339 | rs752689029        | G | C | 2   | 0  | 2   | African American | 1           | 0           |
| GPC2 | chr7 | 100171344 | rs202046333        | C | T | 2   | 1  | 1   | European         | 1           | 0           |
| GPC2 | chr7 | 100171546 | rs565300517        | G | A | 11  | 4  | 7   | Latin American 1 | 0.818181818 | 0.297520661 |
| GPC2 | chr7 | 100171569 | rs368040702        | G | A | 36  | 10 | 26  | European         | 0.527777778 | 0.546296296 |
| GPC2 | chr7 | 100171579 | rs748268440        | G | T | 3   | 1  | 2   | European         | 1           | 0           |
| GPC2 | chr7 | 100171581 | rs769842519        | G | A | 2   | 1  | 1   | European         | 1           | 0           |
| GPC2 | chr7 | 100171594 | rs774523896        | C | T | 2   | 0  | 2   | African American | 0.5         | 0.5         |
| GPC2 | chr7 | 100171624 | rs753842098        | A | G | 3   | 2  | 1   | African American | 1           | 0           |
| GPC2 | chr7 | 100171627 | rs757074443        | G | C | 4   | 1  | 3   | European         | 1           | 0           |
| GPC2 | chr7 | 100171824 | rs746323875        | C | G | 3   | 2  | 1   | European         | 1           | 0           |
| GPC2 | chr7 | 100171861 | rs776341060        | C | G | 5   | 2  | 3   | East Asian       | 1           | 0           |
| GPC2 | chr7 | 100171894 | rs759375084        | A | C | 5   | 3  | 2   | African American | 0.8         | 0.32        |
| GPC2 | chr7 | 100171904 | rs957180086        | G | C | 2   | 2  | 0   | Latin American 1 | 1           | 0           |
| GPC2 | chr7 | 100171907 | rs757303451        | G | T | 3   | 3  | 0   | European         | 0.666666667 | 0.444444444 |
| GPC2 | chr7 | 100172115 | chr7_100172115_T_C | T | C | 4   | 1  | 3   | European         | 1           | 0           |
| GPC2 | chr7 | 100172128 | chr7_100172128_A_C | A | C | 5   | 3  | 2   | European         | 0.4         | 0.64        |
| GPC2 | chr7 | 100173894 | rs756842148        | T | C | 2   | 1  | 1   | European         | 1           | 0           |
| GPC2 | chr7 | 100173907 | rs745448053        | C | T | 2   | 0  | 2   | South Asian      | 1           | 0           |
| GPC2 | chr7 | 100173916 | rs371965009        | G | T | 2   | 1  | 1   | African American | 0.5         | 0.5         |
| GPC2 | chr7 | 100173918 | rs199810091        | A | G | 8   | 3  | 5   | European         | 0.625       | 0.46875     |
| GPC2 | chr7 | 100173936 | rs781076566        | C | T | 4   | 0  | 4   | European         | 0.5         | 0.625       |
| GPC2 | chr7 | 100173946 | rs759714335        | G | A | 7   | 3  | 4   | East Asian       | 1           | 0           |
| GPC2 | chr7 | 100173952 | rs371635224        | C | T | 3   | 1  | 2   | European         | 0.666666667 | 0.444444444 |
| GPC2 | chr7 | 100173960 | rs113203779        | C | T | 5   | 2  | 3   | European         | 0.6         | 0.48        |
| GPC2 | chr7 | 100173991 | rs200632076        | C | A | 4   | 3  | 1   | Latin American 1 | 1           | 0           |
| GPC2 | chr7 | 100173993 | rs143363643        | G | A | 5   | 3  | 2   | European         | 0.6         | 0.56        |
| GPC2 | chr7 | 100174696 | rs199607762        | C | T | 3   | 2  | 1   | European         | 0.666666667 | 0.444444444 |
| GPC2 | chr7 | 100174740 | rs781182638        | C | G | 2   | 1  | 1   | European         | 0.5         | 0.5         |
| GPC2 | chr7 | 100174744 | rs141675739        | C | T | 2   | 0  | 2   | Latin American 1 | 1           | 0           |
| GPC2 | chr7 | 100175585 | rs749760530        | C | T | 3   | 1  | 2   | European         | 0.666666667 | 0.444444444 |
| GPC2 | chr7 | 100175588 | rs147028529        | C | T | 6   | 1  | 5   | European         | 0.833333333 | 0.277777778 |
| GPC2 | chr7 | 100175588 | chr7_100175588_C_A | C | A | 3   | 0  | 3   | African American | 0.333333333 | 0.666666667 |
| GPC2 | chr7 | 100175589 | rs533621775        | G | A | 2   | 0  | 2   | Latin American 1 | 1           | 0           |
| GPC2 | chr7 | 100175615 | rs186452595        | G | A | 2   | 1  | 1   | East Asian       | 1           | 0           |
| GPC2 | chr7 | 100175664 | rs777839211        | G | C | 13  | 2  | 11  | Latin American 2 | 0.461538462 | 0.568047337 |
| GPC2 | chr7 | 100175729 | rs768056762        | G | A | 3   | 0  | 3   | African American | 0.333333333 | 0.666666667 |
| GPC2 | chr7 | 100175729 | chr7_100175729_G_T | G | T | 2   | 1  | 1   | Latin American 1 | 1           | 0           |
| GPC2 | chr7 | 100175768 | rs200319192        | A | C | 5   | 2  | 3   | European         | 0.6         | 0.48        |
| GPC2 | chr7 | 100175792 | rs1347042936       | C | T | 4   | 1  | 3   | South Asian      | 0.75        | 0.375       |
| GPC2 | chr7 | 100175807 | chr7_100175807_G_C | G | C | 12  | 5  | 7   | European         | 0.5         | 0.680555556 |
| GPC2 | chr7 | 100175808 | rs138111557        | C | T | 27  | 5  | 22  | African American | 0.62962963  | 0.53223594  |
| GPC2 | chr7 | 100175820 | rs118178297        | A | G | 8   | 3  | 5   | European         | 0.875       | 0.21875     |
| GPC2 | chr7 | 100175825 | rs139852269        | C | T | 5   | 1  | 4   | European         | 0.6         | 0.48        |

|         |       |           |                     |   |   |     |     |     |                  |             |             |
|---------|-------|-----------|---------------------|---|---|-----|-----|-----|------------------|-------------|-------------|
| GPC2    | chr7  | 100176326 | chr7_100176326_C_T  | C | T | 5   | 2   | 3   | Latin American 1 | 1           | 0           |
| GPC2    | chr7  | 100176339 | rs201453724         | C | G | 13  | 9   | 4   | European         | 1           | 0           |
| GPC2    | chr7  | 100176341 | rs1243786146        | T | G | 2   | 2   | 0   | African American | 1           | 0           |
| GPC2    | chr7  | 100176351 | rs146171263         | C | T | 81  | 22  | 59  | Latin American 1 | 0.666666667 | 0.486511203 |
| GPC2    | chr7  | 100177079 | rs775950099         | C | T | 2   | 1   | 1   | Latin American 2 | 1           | 0           |
| GPC2    | chr7  | 100177139 | rs747961336         | C | T | 2   | 0   | 2   | African American | 1           | 0           |
| GPC2    | chr7  | 100177145 | rs151114110         | C | G | 2   | 1   | 1   | European         | 1           | 0           |
| GPC2    | chr7  | 100177184 | rs762233816         | G | A | 2   | 0   | 2   | South Asian      | 1           | 0           |
| GPC2    | chr7  | 100177192 | rs138935052         | G | C | 5   | 2   | 3   | European         | 1           | 0           |
| PPP2R2D | chr10 | 131901157 | chr10_131901157_T_G | T | G | 183 | 29  | 154 | European         | 0.442622951 | 0.689480128 |
| PPP2R2D | chr10 | 131901158 | chr10_131901158_G_A | G | A | 2   | 2   | 0   | African American | 1           | 0           |
| PPP2R2D | chr10 | 131901159 | chr10_131901159_A_C | A | C | 25  | 4   | 21  | European         | 0.4         | 0.7168      |
| PPP2R2D | chr10 | 131901221 | rs1415576080        | C | A | 3   | 0   | 3   | African American | 0.666666667 | 0.444444444 |
| PPP2R2D | chr10 | 131901222 | rs1169582352        | C | G | 24  | 0   | 24  | South Asian      | 1           | 0           |
| PPP2R2D | chr10 | 131901224 | rs1241326651        | C | A | 4   | 1   | 3   | European         | 1           | 0           |
| PPP2R2D | chr10 | 131901225 | rs1463689338        | G | A | 3   | 1   | 2   | Latin American 2 | 0.666666667 | 0.444444444 |
| PPP2R2D | chr10 | 131901226 | rs1255180942        | T | G | 426 | 88  | 338 | European         | 0.492957746 | 0.666380127 |
| PPP2R2D | chr10 | 131901227 | chr10_131901227_T_G | T | G | 158 | 20  | 138 | European         | 0.544303797 | 0.601426054 |
| PPP2R2D | chr10 | 131901229 | chr10_131901229_T_G | T | G | 48  | 8   | 40  | European         | 0.458333333 | 0.642361111 |
| PPP2R2D | chr10 | 131940015 | rs371185897         | T | G | 3   | 2   | 1   | African American | 0.333333333 | 0.666666667 |
| PPP2R2D | chr10 | 131940204 | rs979868985         | T | C | 2   | 0   | 2   | European         | 1           | 0           |
| PPP2R2D | chr10 | 131940698 | rs148713648         | C | T | 308 | 82  | 226 | European         | 0.753246753 | 0.413455051 |
| PPP2R2D | chr10 | 131940701 | rs373556871         | G | A | 53  | 22  | 31  | European         | 0.849056604 | 0.268422926 |
| PPP2R2D | chr10 | 131945283 | rs373671764         | A | G | 18  | 12  | 6   | European         | 0.611111111 | 0.580246914 |
| PPP2R2D | chr10 | 131945291 | rs782300124         | C | G | 10  | 6   | 4   | European         | 1           | 0           |
| PPP2R2D | chr10 | 131945467 | rs772281623         | C | T | 2   | 1   | 1   | African American | 0.5         | 0.5         |
| PPP2R2D | chr10 | 131947518 | rs374297211         | T | C | 3   | 1   | 2   | European         | 0.333333333 | 0.666666667 |
| PPP2R2D | chr10 | 131901149 | chr10_131901149_A_C | A | C | 246 | 33  | 213 | European         | 0.508130081 | 0.667030207 |
| DEAF1   | chr11 | 644561    | rs148729216         | C | T | 11  | 5   | 6   | European         | 1           | 0           |
| DEAF1   | chr11 | 644568    | rs79183202          | C | G | 199 | 77  | 122 | East Asian       | 0.954773869 | 0.086765486 |
| DEAF1   | chr11 | 644600    | chr11_644600_C_T    | C | T | 2   | 0   | 2   | Native American  | 1           | 0           |
| DEAF1   | chr11 | 644608    | rs111947578         | G | C | 17  | 6   | 11  | European         | 0.941176471 | 0.110726644 |
| DEAF1   | chr11 | 644614    | rs34114147          | G | C | 553 | 165 | 388 | European         | 0.571428571 | 0.593501172 |
| DEAF1   | chr11 | 644621    | rs748500387         | A | C | 3   | 1   | 2   | European         | 1           | 0           |
| DEAF1   | chr11 | 653967    | rs147630756         | G | A | 4   | 1   | 3   | Latin American 2 | 0.5         | 0.625       |
| DEAF1   | chr11 | 654029    | rs193920740         | C | T | 3   | 0   | 3   | European         | 1           | 0           |
| DEAF1   | chr11 | 654030    | rs368021470         | G | A | 2   | 0   | 2   | European         | 0.5         | 0.5         |
| DEAF1   | chr11 | 654042    | rs752675422         | C | T | 2   | 1   | 1   | AFR              | 0.5         | 0.5         |
| DEAF1   | chr11 | 674543    | rs1475326043        | C | T | 2   | 1   | 1   | African American | 1           | 0           |
| DEAF1   | chr11 | 674569    | rs897598221         | C | G | 5   | 3   | 2   | Latin American 1 | 1           | 0           |
| DEAF1   | chr11 | 674584    | chr11_674584_T_A    | T | A | 2   | 0   | 2   | European         | 1           | 0           |
| DEAF1   | chr11 | 674588    | rs752205049         | C | T | 2   | 0   | 2   | African American | 1           | 0           |
| DEAF1   | chr11 | 674624    | rs371112625         | G | A | 2   | 0   | 2   | East Asian       | 0.5         | 0.5         |
| DEAF1   | chr11 | 674657    | rs201341584         | T | C | 8   | 1   | 7   | European         | 0.625       | 0.5625      |
| DEAF1   | chr11 | 674691    | rs374222357         | G | A | 3   | 2   | 1   | European         | 1           | 0           |
| DEAF1   | chr11 | 674721    | rs149746031         | C | T | 11  | 2   | 9   | European         | 0.818181818 | 0.297520661 |

|       |       |        |                        |             |          |     |    |     |                  |             |             |
|-------|-------|--------|------------------------|-------------|----------|-----|----|-----|------------------|-------------|-------------|
| DEAF1 | chr11 | 674733 | rs7125451              | C           | T        | 37  | 16 | 21  | East Asian       | 1           | 0           |
| DEAF1 | chr11 | 674747 | rs373286290            | G           | A        | 3   | 2  | 1   | European         | 0.666666667 | 0.444444444 |
| DEAF1 | chr11 | 678705 | rs192026177            | T           | C        | 16  | 3  | 13  | Latin American 1 | 1           | 0           |
| DEAF1 | chr11 | 678712 | rs370451688            | T           | C        | 4   | 1  | 3   | European         | 0.75        | 0.375       |
| DEAF1 | chr11 | 678763 | rs138447102            | C           | T        | 53  | 16 | 37  | European         | 0.811320755 | 0.328942684 |
| DEAF1 | chr11 | 678798 | rs755235331            | G           | A        | 7   | 2  | 5   | European         | 1           | 0           |
| DEAF1 | chr11 | 678808 | rs753669832            | C           | T        | 4   | 2  | 2   | European         | 0.5         | 0.625       |
| DEAF1 | chr11 | 679700 | rs371467345            | C           | T        | 30  | 0  | 30  | South Asian      | 0.966666667 | 0.064444444 |
| DEAF1 | chr11 | 679706 | rs143058369            | C           | T        | 6   | 2  | 4   | European         | 0.833333333 | 0.277777778 |
| DEAF1 | chr11 | 679714 | rs762624710            | T           | G        | 3   | 0  | 3   | Latin American 2 | 0.666666667 | 0.444444444 |
| DEAF1 | chr11 | 679804 | rs372135504            | G           | C        | 4   | 2  | 2   | East Asian       | 1           | 0           |
| DEAF1 | chr11 | 679811 | rs375032027            | C           | T        | 7   | 3  | 4   | European         | 1           | 0           |
| DEAF1 | chr11 | 680974 | chr11_680974_G_C       | G           | C        | 2   | 1  | 1   | African American | 0.5         | 0.5         |
| DEAF1 | chr11 | 680975 | rs144717498            | C           | T        | 6   | 0  | 6   | South Asian      | 0.833333333 | 0.277777778 |
| DEAF1 | chr11 | 680981 | rs574194648            | C           | T        | 3   | 1  | 2   | South Asian      | 1           | 0           |
| DEAF1 | chr11 | 681001 | rs148536538            | T           | C        | 4   | 0  | 4   | African American | 0.5         | 0.625       |
| DEAF1 | chr11 | 681025 | rs377023815            | G           | C        | 13  | 4  | 9   | African American | 0.538461538 | 0.591715976 |
| DEAF1 | chr11 | 686935 | rs71469813             | T           | C        | 230 | 75 | 155 | European         | 0.886956522 | 0.209905482 |
| DEAF1 | chr11 | 688376 | rs200600001            | C           | T        | 11  | 5  | 6   | European         | 1           | 0           |
| DEAF1 | chr11 | 688416 | rs566174877            | T           | G        | 7   | 1  | 6   | African American | 0.571428571 | 0.571428571 |
| DEAF1 | chr11 | 691527 | rs749825655            | C           | T        | 2   | 0  | 2   | East Asian       | 0.5         | 0.5         |
| DEAF1 | chr11 | 691572 | rs143376874            | C           | T        | 3   | 1  | 2   | European         | 0.666666667 | 0.444444444 |
| DEAF1 | chr11 | 694794 | chr11_694794_C_A       | C           | A        | 2   | 0  | 2   | European         | 1           | 0           |
| DEAF1 | chr11 | 694797 | rs763981738            | G           | C        | 2   | 1  | 1   | European         | 1           | 0           |
| DEAF1 | chr11 | 694804 | rs751324313            | C           | T        | 9   | 1  | 8   | European         | 0.777777778 | 0.37037037  |
| DEAF1 | chr11 | 694816 | rs756376529            | T           | C        | 3   | 1  | 2   | Latin American 1 | 0.666666667 | 0.444444444 |
| DEAF1 | chr11 | 694827 | rs748707692            | C           | T        | 2   | 0  | 2   | European         | 1           | 0           |
| DEAF1 | chr11 | 694831 | rs1243122062           | G           | A        | 3   | 1  | 2   | European         | 1           | 0           |
| DEAF1 | chr11 | 694881 | rs148382494            | G           | T        | 3   | 1  | 2   | African American | 0.666666667 | 0.444444444 |
| DEAF1 | chr11 | 694918 | rs755103579            | T           | C        | 6   | 1  | 5   | Latin American 2 | 0.833333333 | 0.277777778 |
| DEAF1 | chr11 | 694927 | chr11_694927_C_T       | C           | T        | 2   | 1  | 1   | Latin American 2 | 0.5         | 0.5         |
| DEAF1 | chr11 | 694936 | rs757711419            | C           | T        | 8   | 6  | 2   | European         | 0.875       | 0.21875     |
| DEAF1 | chr11 | 694944 | chr11_694944_C_T       | C           | T        | 2   | 0  | 2   | South Asian      | 1           | 0           |
| DEAF1 | chr11 | 694947 | rs761172741            | CCTGCCGCGGC | C        | 13  | 3  | 10  | European         | 0.307692308 | 0.804733728 |
| DEAF1 | chr11 | 694947 | rs1001719666           | C           | T        | 2   | 0  | 2   | African American | 1           | 0           |
| DEAF1 | chr11 | 694949 | rs778970025            | T           | TGCCGCG  | 2   | 0  | 2   | European         | 0.5         | 0.5         |
| DEAF1 | chr11 | 694949 | rs766934551            | TGCCGCGCCG  | T        | 26  | 8  | 18  | European         | 0.692307692 | 0.48816568  |
| DEAF1 | chr11 | 694952 | rs752994574            | CGCGGCCGCG  | C        | 33  | 16 | 17  | European         | 0.484848485 | 0.699724518 |
| DEAF1 | chr11 | 694952 | chr11_694952_C_CGCGGCC | C           | CGCGGCCG | 2   | 1  | 1   | European         | 1           | 0           |
| DEAF1 | chr11 | 694956 | rs1168147612           | G           | A        | 3   | 2  | 1   | European         | 0.666666667 | 0.444444444 |
| DEAF1 | chr11 | 694958 | rs781243390            | CGCGGCCGCC  | C        | 31  | 10 | 21  | European         | 0.870967742 | 0.235171696 |
| DEAF1 | chr11 | 694961 | rs774959342            | G           | GGCC     | 10  | 0  | 10  | South Asian      | 0.7         | 0.48        |
| DEAF1 | chr11 | 694961 | rs769664625            | GGCCGCCGCC  | G        | 36  | 13 | 23  | European         | 0.361111111 | 0.75308642  |
| DEAF1 | chr11 | 694961 | rs1225810957           | GGCCGCCGCC  | G        | 2   | 2  | 0   | African American | 0.5         | 0.5         |
| DEAF1 | chr11 | 694962 | rs748949371            | GCCGCCGCCG  | G        | 6   | 0  | 6   | European         | 0.333333333 | 0.777777778 |
| DEAF1 | chr11 | 694962 | chr11_694962_G_GGCCCC  | G           | GGCCCC   | 55  | 8  | 47  | European         | 0.618181818 | 0.577190083 |

|         |       |          |                        |             |         |     |     |     |                  |             |             |
|---------|-------|----------|------------------------|-------------|---------|-----|-----|-----|------------------|-------------|-------------|
| DEAF1   | chr11 | 694962   | chr11_694962_G_GGCC    | G           | GGCC    | 44  | 7   | 37  | European         | 0.636363636 | 0.546487603 |
| DEAF1   | chr11 | 694962   | chr11_694962_G_GGCCCCC | G           | GGCCCCC | 6   | 1   | 5   | Latin American 2 | 0.666666667 | 0.5         |
| DEAF1   | chr11 | 694965   | rs768085739            | GCCGCCGCCAC | G       | 9   | 2   | 7   | European         | 0.333333333 | 0.716049383 |
| DEAF1   | chr11 | 694965   | chr11_694965_G_C       | G           | C       | 546 | 84  | 462 | European         | 0.641025641 | 0.550134847 |
| DEAF1   | chr11 | 694967   | rs1461468531           | CGCCGCCACAG | C       | 4   | 2   | 2   | African American | 0.25        | 0.75        |
| DEAF1   | chr11 | 694968   | rs773843056            | GCCGCCACAGC | G       | 3   | 0   | 3   | Latin American 2 | 1           | 0           |
| DEAF1   | chr11 | 694968   | chr11_694968_G_C       | G           | C       | 541 | 93  | 448 | European         | 0.624768946 | 0.568461909 |
| DEAF1   | chr11 | 694971   | chr11_694971_G_C       | G           | C       | 385 | 64  | 321 | European         | 0.636363636 | 0.555506831 |
| DEAF1   | chr11 | 694974   | chr11_694974_A_C       | A           | C       | 537 | 108 | 429 | European         | 0.502793296 | 0.683436847 |
| DEAF1   | chr11 | 694976   | rs1434138758           | A           | AGCGGCC | 2   | 2   | 0   | European         | 1           | 0           |
| DEAF1   | chr11 | 694977   | chr11_694977_G_C       | G           | C       | 13  | 2   | 11  | Latin American 1 | 0.384615385 | 0.721893491 |
| DEAF1   | chr11 | 694985   | rs1410120201           | G           | GGCC    | 6   | 1   | 5   | South Asian      | 0.333333333 | 0.777777778 |
| DEAF1   | chr11 | 694988   | rs987922936            | C           | CGCG    | 2   | 2   | 0   | East Asian       | 0.5         | 0.5         |
| DEAF1   | chr11 | 694992   | rs767318857            | A           | G       | 81  | 25  | 56  | European         | 0.62962963  | 0.575826856 |
| DEAF1   | chr11 | 694992   | chr11_694992_A_C       | A           | C       | 7   | 0   | 7   | East Asian       | 0.428571429 | 0.734693878 |
| DEAF1   | chr11 | 694992   | chr11_694992_A_ACCGCCG | A           | ACCGCCG | 3   | 0   | 3   | Latin American 1 | 0.666666667 | 0.444444444 |
| DEAF1   | chr11 | 695003   | rs904830213            | C           | G       | 2   | 0   | 2   | Latin American 1 | 1           | 0           |
| CREB3L1 | chr11 | 46278212 | chr11_46278212_C_A     | C           | A       | 2   | 0   | 2   | African American | 1           | 0           |
| CREB3L1 | chr11 | 46299936 | rs764415914            | A           | G       | 2   | 1   | 1   | African American | 1           | 0           |
| CREB3L1 | chr11 | 46300034 | rs1420092997           | A           | G       | 2   | 1   | 1   | Latin American 2 | 1           | 0           |
| CREB3L1 | chr11 | 46300043 | rs561931720            | T           | A       | 11  | 1   | 10  | Latin American 1 | 1           | 0           |
| CREB3L1 | chr11 | 46300068 | rs529633529            | C           | T       | 13  | 4   | 9   | South Asian      | 0.307692308 | 0.804733728 |
| CREB3L1 | chr11 | 46300073 | rs376518615            | G           | A       | 2   | 1   | 1   | European         | 1           | 0           |
| CREB3L1 | chr11 | 46300083 | rs370923002            | C           | T       | 2   | 0   | 2   | European         | 1           | 0           |
| CREB3L1 | chr11 | 46300105 | chr11_46300105_C_A     | C           | A       | 2   | 0   | 2   | European         | 0.5         | 0.5         |
| CREB3L1 | chr11 | 46300106 | rs200839792            | G           | A       | 89  | 28  | 61  | European         | 0.707865169 | 0.470395152 |
| CREB3L1 | chr11 | 46300109 | rs186134647            | G           | A       | 2   | 0   | 2   | East Asian       | 1           | 0           |
| CREB3L1 | chr11 | 46300116 | rs190038304            | C           | T       | 65  | 24  | 41  | European         | 0.630769231 | 0.554319527 |
| CREB3L1 | chr11 | 46300158 | rs773238619            | C           | A       | 4   | 1   | 3   | Latin American 2 | 0.75        | 0.375       |
| CREB3L1 | chr11 | 46307833 | rs1049083998           | T           | G       | 2   | 1   | 1   | African American | 1           | 0           |
| CREB3L1 | chr11 | 46307837 | rs769702533            | C           | T       | 7   | 2   | 5   | African American | 0.428571429 | 0.693877551 |
| CREB3L1 | chr11 | 46307882 | rs760202144            | G           | A       | 2   | 1   | 1   | African American | 1           | 0           |
| CREB3L1 | chr11 | 46307902 | rs756246596            | C           | T       | 2   | 1   | 1   | European         | 0.5         | 0.5         |
| CREB3L1 | chr11 | 46307918 | rs746245139            | C           | T       | 4   | 0   | 4   | Latin American 1 | 0.75        | 0.375       |
| CREB3L1 | chr11 | 46307924 | chr11_46307924_T_G     | T           | G       | 60  | 9   | 51  | European         | 0.633333333 | 0.562777778 |
| CREB3L1 | chr11 | 46307932 | rs764982042            | G           | A       | 9   | 1   | 8   | European         | 0.444444444 | 0.716049383 |
| CREB3L1 | chr11 | 46307933 | rs750033798            | C           | T       | 2   | 1   | 1   | Latin American 2 | 0.5         | 0.5         |
| CREB3L1 | chr11 | 46307938 | rs199951144            | G           | A       | 629 | 198 | 431 | African American | 0.348171701 | 0.733978531 |
| CREB3L1 | chr11 | 46307941 | chr11_46307941_A_C     | A           | C       | 288 | 33  | 255 | European         | 0.59375     | 0.594762731 |
| CREB3L1 | chr11 | 46307942 | chr11_46307942_T_G     | T           | G       | 129 | 17  | 112 | European         | 0.666666667 | 0.515113274 |
| CREB3L1 | chr11 | 46307942 | chr11_46307942_T_A     | T           | A       | 17  | 3   | 14  | European         | 0.823529412 | 0.30449827  |
| CREB3L1 | chr11 | 46307947 | rs372330073            | A           | C       | 118 | 23  | 95  | African American | 0.406779661 | 0.692760701 |
| CREB3L1 | chr11 | 46307948 | rs951598006            | C           | T       | 3   | 2   | 1   | European         | 1           | 0           |
| CREB3L1 | chr11 | 46307950 | rs1027062760           | A           | C       | 19  | 5   | 14  | European         | 0.578947368 | 0.603878116 |
| CREB3L1 | chr11 | 46307956 | rs746052262            | C           | G       | 3   | 0   | 3   | European         | 1           | 0           |
| CREB3L1 | chr11 | 46307990 | rs556156637            | T           | C       | 4   | 0   | 4   | South Asian      | 1           | 0           |

|         |       |           |              |   |   |     |    |     |                  |             |             |
|---------|-------|-----------|--------------|---|---|-----|----|-----|------------------|-------------|-------------|
| CREB3L1 | chr11 | 46310002  | rs1256147545 | T | C | 2   | 1  | 1   | Latin American 1 | 1           | 0           |
| CREB3L1 | chr11 | 46311035  | rs187725533  | A | T | 239 | 88 | 151 | European         | 0.815899582 | 0.321598011 |
| CREB3L1 | chr11 | 46311053  | rs775343544  | C | T | 4   | 1  | 3   | Native American  | 0.5         | 0.625       |
| CREB3L1 | chr11 | 46311088  | rs376081099  | G | C | 3   | 2  | 1   | East Asian       | 0.666666667 | 0.444444444 |
| CREB3L1 | chr11 | 46311103  | rs745567388  | C | T | 3   | 1  | 2   | European         | 1           | 0           |
| CREB3L1 | chr11 | 46311104  | rs771754544  | G | A | 2   | 1  | 1   | Native American  | 1           | 0           |
| CREB3L1 | chr11 | 46311116  | rs776576938  | C | G | 2   | 1  | 1   | European         | 0.5         | 0.5         |
| CREB3L1 | chr11 | 46311142  | rs565308246  | C | T | 2   | 1  | 1   | European         | 1           | 0           |
| CREB3L1 | chr11 | 46311143  | rs367799632  | G | A | 3   | 1  | 2   | European         | 1           | 0           |
| CREB3L1 | chr11 | 46311172  | rs371931737  | C | G | 6   | 0  | 6   | European         | 1           | 0           |
| CREB3L1 | chr11 | 46312341  | rs762019941  | C | T | 2   | 0  | 2   | South Asian      | 1           | 0           |
| CREB3L1 | chr11 | 46312454  | rs777788054  | C | T | 2   | 0  | 2   | African American | 0.5         | 0.5         |
| CREB3L1 | chr11 | 46312919  | rs760163690  | G | T | 2   | 1  | 1   | European         | 1           | 0           |
| CREB3L1 | chr11 | 46316359  | rs201046043  | G | A | 9   | 2  | 7   | European         | 1           | 0           |
| CREB3L1 | chr11 | 46316363  | rs776460030  | C | T | 2   | 0  | 2   | South Asian      | 1           | 0           |
| CREB3L1 | chr11 | 46316371  | rs192830386  | G | A | 151 | 39 | 112 | African American | 0.61589404  | 0.54050261  |
| CREB3L1 | chr11 | 46317379  | rs764216900  | G | T | 3   | 2  | 1   | European         | 1           | 0           |
| CREB3L1 | chr11 | 46317400  | rs376498466  | G | A | 2   | 0  | 2   | European         | 0.5         | 0.5         |
| CREB3L1 | chr11 | 46317401  | rs376774084  | T | C | 15  | 6  | 9   | Latin American 1 | 0.933333333 | 0.124444444 |
| CREB3L1 | chr11 | 46317412  | rs557139571  | C | T | 3   | 0  | 3   | South Asian      | 1           | 0           |
| CREB3L1 | chr11 | 46317415  | rs747678376  | G | A | 2   | 0  | 2   | South Asian      | 1           | 0           |
| CREB3L1 | chr11 | 46317416  | rs1014411792 | A | G | 6   | 1  | 5   | Latin American 1 | 0.833333333 | 0.277777778 |
| CREB3L1 | chr11 | 46317469  | rs559259997  | G | A | 2   | 1  | 1   | European         | 0.5         | 0.5         |
| CREB3L1 | chr11 | 46320290  | rs1170864052 | G | A | 2   | 0  | 2   | South Asian      | 1           | 0           |
| CREB3L1 | chr11 | 46320321  | rs140441557  | G | A | 2   | 0  | 2   | African American | 0.5         | 0.5         |
| CREB3L1 | chr11 | 46320330  | rs544539212  | T | G | 83  | 5  | 78  | South Asian      | 0.891566265 | 0.195674263 |
| CREB3L1 | chr11 | 46320338  | rs144263134  | A | G | 106 | 39 | 67  | African American | 0.528301887 | 0.584727661 |
| CREB3L1 | chr11 | 46320339  | rs367810523  | T | C | 3   | 1  | 2   | European         | 1           | 0           |
| CREB3L1 | chr11 | 46320371  | rs370086040  | G | A | 3   | 2  | 1   | African American | 0.333333333 | 0.666666667 |
| CREB3L1 | chr11 | 46320389  | rs929760986  | C | T | 3   | 2  | 1   | African American | 0.333333333 | 0.666666667 |
| CREB3L1 | chr11 | 46320393  | rs774283491  | C | T | 6   | 3  | 3   | European         | 0.5         | 0.5         |
| CREB3L1 | chr11 | 46320395  | rs35636632   | C | T | 9   | 0  | 9   | South Asian      | 0.333333333 | 0.740740741 |
| CREB3L1 | chr11 | 46320396  | rs199553915  | G | A | 15  | 6  | 9   | Latin American 1 | 0.866666667 | 0.231111111 |
| CREB3L1 | chr11 | 46320431  | rs367930951  | C | T | 6   | 2  | 4   | Latin American 1 | 0.666666667 | 0.5         |
| CREB3L1 | chr11 | 46320455  | rs764866404  | G | A | 4   | 0  | 4   | Latin American 1 | 1           | 0           |
| CREB3L1 | chr11 | 46320457  | rs188423609  | G | C | 17  | 5  | 12  | Latin American 1 | 0.647058824 | 0.491349481 |
| CREB3L1 | chr11 | 46320474  | rs754844256  | G | C | 4   | 1  | 3   | East Asian       | 1           | 0           |
| CREB3L1 | chr11 | 46320482  | rs368441030  | G | A | 3   | 2  | 1   | European         | 1           | 0           |
| CREB3L1 | chr11 | 46320494  | rs745959450  | G | A | 2   | 0  | 2   | African American | 0.5         | 0.5         |
| CREB3L1 | chr11 | 46320501  | rs550341266  | C | A | 4   | 0  | 4   | South Asian      | 1           | 0           |
| CREB3L1 | chr11 | 46320509  | rs747175434  | A | C | 5   | 2  | 3   | European         | 1           | 0           |
| CREB3L1 | chr11 | 46320518  | rs774093366  | T | A | 3   | 2  | 1   | European         | 0.666666667 | 0.444444444 |
| CREB3L1 | chr11 | 46320727  | rs192656420  | C | A | 9   | 2  | 7   | Latin American 2 | 0.666666667 | 0.49382716  |
| ACADS   | chr12 | 120725925 | rs542140065  | C | G | 5   | 0  | 5   | European         | 1           | 0           |
| ACADS   | chr12 | 120727026 | rs147494970  | C | T | 13  | 3  | 10  | African American | 0.538461538 | 0.603550296 |
| ACADS   | chr12 | 120727044 | rs774970155  | G | T | 2   | 0  | 2   | European         | 0.5         | 0.5         |

|       |       |           |                     |      |   |     |     |    |                  |             |             |
|-------|-------|-----------|---------------------|------|---|-----|-----|----|------------------|-------------|-------------|
| ACADS | chr12 | 120727047 | rs773600043         | G    | A | 3   | 2   | 1  | European         | 1           | 0           |
| ACADS | chr12 | 120727085 | rs982006585         | G    | A | 5   | 1   | 4  | Latin American 1 | 0.4         | 0.72        |
| ACADS | chr12 | 120727103 | rs143948985         | C    | T | 2   | 0   | 2  | African American | 1           | 0           |
| ACADS | chr12 | 120727115 | rs121908003         | C    | T | 14  | 2   | 12 | Latin American 1 | 0.428571429 | 0.704081633 |
| ACADS | chr12 | 120727127 | rs1194074272        | GAGA | G | 2   | 2   | 0  | European         | 1           | 0           |
| ACADS | chr12 | 120727143 | rs147442301         | C    | T | 6   | 3   | 3  | East Asian       | 0.833333333 | 0.277777778 |
| ACADS | chr12 | 120727168 | rs371096896         | A    | T | 2   | 0   | 2  | African American | 0.5         | 0.5         |
| ACADS | chr12 | 120727182 | rs148789330         | C    | A | 2   | 1   | 1  | African American | 0.5         | 0.5         |
| ACADS | chr12 | 120736990 | rs142476255         | A    | G | 3   | 2   | 1  | African American | 1           | 0           |
| ACADS | chr12 | 120736993 | rs760948905         | A    | T | 3   | 0   | 3  | Latin American 2 | 1           | 0           |
| ACADS | chr12 | 120737025 | rs751283667         | G    | A | 3   | 1   | 2  | European         | 0.666666667 | 0.444444444 |
| ACADS | chr12 | 120737049 | rs121908004         | G    | T | 3   | 2   | 1  | European         | 0.666666667 | 0.444444444 |
| ACADS | chr12 | 120737059 | rs369400082         | A    | G | 6   | 2   | 4  | African American | 1           | 0           |
| ACADS | chr12 | 120737079 | rs766216232         | A    | G | 3   | 2   | 1  | Latin American 1 | 0.666666667 | 0.444444444 |
| ACADS | chr12 | 120737094 | rs61732144          | C    | T | 60  | 20  | 40 | European         | 0.933333333 | 0.126111111 |
| ACADS | chr12 | 120737095 | rs755697930         | G    | A | 4   | 2   | 2  | European         | 0.5         | 0.625       |
| ACADS | chr12 | 120737125 | rs1409242138        | G    | A | 2   | 0   | 2  | European         | 1           | 0           |
| ACADS | chr12 | 120737408 | rs17848085          | C    | T | 14  | 5   | 9  | East Asian       | 0.428571429 | 0.683673469 |
| ACADS | chr12 | 120737412 | rs149107232         | G    | C | 3   | 1   | 2  | European         | 0.666666667 | 0.444444444 |
| ACADS | chr12 | 120737858 | rs770417119         | C    | T | 12  | 4   | 8  | Latin American 1 | 0.833333333 | 0.291666667 |
| ACADS | chr12 | 120737869 | rs777002501         | A    | C | 3   | 0   | 3  | South Asian      | 1           | 0           |
| ACADS | chr12 | 120737872 | rs765604622         | G    | T | 9   | 3   | 6  | European         | 0.555555556 | 0.49382716  |
| ACADS | chr12 | 120737872 | chr12_120737872_G_A | G    | A | 3   | 2   | 1  | European         | 0.666666667 | 0.444444444 |
| ACADS | chr12 | 120737887 | rs960658568         | G    | A | 2   | 0   | 2  | European         | 0.5         | 0.5         |
| ACADS | chr12 | 120737893 | rs57443665          | T    | C | 105 | 30  | 75 | African American | 0.666666667 | 0.50031746  |
| ACADS | chr12 | 120737939 | rs28940874          | C    | T | 5   | 1   | 4  | European         | 1           | 0           |
| ACADS | chr12 | 120737942 | rs369167716         | C    | T | 2   | 1   | 1  | European         | 0.5         | 0.5         |
| ACADS | chr12 | 120737960 | rs766579880         | C    | T | 3   | 2   | 1  | European         | 0.333333333 | 0.666666667 |
| ACADS | chr12 | 120738310 | rs144815059         | A    | T | 38  | 11  | 27 | African American | 0.5         | 0.608033241 |
| ACADS | chr12 | 120738311 | rs148588313         | C    | T | 8   | 4   | 4  | African American | 0.375       | 0.71875     |
| ACADS | chr12 | 120738323 | rs143131689         | C    | T | 3   | 1   | 2  | European         | 0.666666667 | 0.444444444 |
| ACADS | chr12 | 120738356 | rs749242337         | G    | A | 3   | 0   | 3  | South Asian      | 0.666666667 | 0.444444444 |
| ACADS | chr12 | 120738551 | rs539219309         | C    | T | 2   | 0   | 2  | European         | 1           | 0           |
| ACADS | chr12 | 120738552 | rs374726386         | G    | A | 4   | 2   | 2  | African American | 0.5         | 0.5         |
| ACADS | chr12 | 120738554 | rs769242128         | A    | G | 2   | 0   | 2  | South Asian      | 1           | 0           |
| ACADS | chr12 | 120738563 | rs199717731         | G    | A | 3   | 2   | 1  | European         | 1           | 0           |
| ACADS | chr12 | 120738566 | rs996621152         | T    | G | 159 | 128 | 31 | European         | 0.943396226 | 0.106799573 |
| ACADS | chr12 | 120738642 | rs770009021         | C    | T | 4   | 0   | 4  | European         | 0.5         | 0.625       |
| ACADS | chr12 | 120738844 | rs777939247         | G    | T | 4   | 2   | 2  | Latin American 1 | 1           | 0           |
| ACADS | chr12 | 120738859 | rs121908006         | C    | T | 4   | 1   | 3  | European         | 0.75        | 0.375       |
| ACADS | chr12 | 120738874 | rs140853839         | C    | T | 38  | 12  | 26 | Latin American 1 | 0.605263158 | 0.54432133  |
| ACADS | chr12 | 120738875 | rs199633532         | G    | A | 8   | 1   | 7  | European         | 0.75        | 0.40625     |
| ACADS | chr12 | 120738899 | rs764917783         | A    | G | 3   | 0   | 3  | South Asian      | 1           | 0           |
| ACADS | chr12 | 120739141 | rs387906950         | A    | G | 12  | 4   | 8  | East Asian       | 1           | 0           |
| ACADS | chr12 | 120739164 | rs202078273         | G    | A | 2   | 1   | 1  | East Asian       | 1           | 0           |
| ACADS | chr12 | 120739168 | rs28941773          | C    | T | 8   | 1   | 7  | European         | 0.875       | 0.21875     |

|       |       |           |                     |   |   |     |    |    |                  |             |             |
|-------|-------|-----------|---------------------|---|---|-----|----|----|------------------|-------------|-------------|
| ACADS | chr12 | 120739182 | rs754459133         | G | T | 2   | 1  | 1  | Latin American 2 | 1           | 0           |
| ACADS | chr12 | 120739188 | rs528266975         | A | G | 23  | 8  | 15 | Latin American 1 | 0.913043478 | 0.15879017  |
| ACADS | chr12 | 120739304 | rs368469075         | G | T | 4   | 3  | 1  | European         | 0.75        | 0.375       |
| ACADS | chr12 | 120739314 | rs145466253         | G | A | 2   | 1  | 1  | European         | 1           | 0           |
| ACADS | chr12 | 120739317 | rs566325901         | A | G | 60  | 3  | 57 | South Asian      | 0.883333333 | 0.212777778 |
| ACADS | chr12 | 120739326 | rs371934737         | G | A | 2   | 1  | 1  | African American | 0.5         | 0.5         |
| ACADS | chr12 | 120739339 | rs183161718         | C | T | 5   | 2  | 3  | East Asian       | 0.4         | 0.72        |
| ACADS | chr12 | 120739347 | rs28940875          | C | T | 8   | 1  | 7  | Latin American 2 | 0.5         | 0.59375     |
| ACADS | chr12 | 120739348 | rs368064268         | G | A | 3   | 2  | 1  | African American | 0.666666667 | 0.444444444 |
| ACADS | chr12 | 120739356 | rs28940872          | C | T | 6   | 2  | 4  | European         | 0.5         | 0.611111111 |
| ACADS | chr12 | 120739362 | rs202124189         | G | T | 30  | 10 | 20 | Latin American 1 | 0.966666667 | 0.064444444 |
| ACADS | chr12 | 120739362 | chr12_120739362_G_A | G | A | 3   | 0  | 3  | Latin American 1 | 1           | 0           |
| ACADS | chr12 | 120739365 | rs537072819         | C | T | 3   | 0  | 3  | European         | 0.666666667 | 0.444444444 |
| ACADS | chr12 | 120739366 | rs766183395         | G | A | 2   | 0  | 2  | European         | 1           | 0           |
| ACADS | chr12 | 120739374 | chr12_120739374_G_C | G | C | 3   | 1  | 2  | European         | 1           | 0           |
| ACADS | chr12 | 120739397 | rs1322896033        | A | C | 14  | 12 | 2  | East Asian       | 0.5         | 0.56122449  |
| ACADS | chr12 | 120739398 | rs1233036235        | A | G | 2   | 1  | 1  | European         | 1           | 0           |
| ACADS | chr12 | 120739405 | rs926187308         | G | A | 2   | 0  | 2  | European         | 1           | 0           |
| ACADS | chr12 | 120739407 | rs369840561         | C | G | 9   | 1  | 8  | Latin American 2 | 0.888888889 | 0.197530864 |
| ACADS | chr12 | 120739407 | chr12_120739407_C_A | C | A | 2   | 1  | 1  | European         | 1           | 0           |
| ACADS | chr12 | 120739416 | rs556890619         | G | A | 9   | 0  | 9  | South Asian      | 0.888888889 | 0.197530864 |
| ACADS | chr12 | 120739419 | chr12_120739419_G_A | G | A | 2   | 1  | 1  | East Asian       | 0.5         | 0.5         |
| ACADS | chr12 | 120739440 | rs369416846         | C | T | 5   | 1  | 4  | East Asian       | 0.4         | 0.72        |
| CCNA1 | chr13 | 36433085  | rs560118670         | T | C | 3   | 0  | 3  | South Asian      | 1           | 0           |
| CCNA1 | chr13 | 36433195  | rs746557549         | G | A | 2   | 1  | 1  | European         | 0.5         | 0.5         |
| CCNA1 | chr13 | 36437678  | rs774471192         | C | T | 3   | 3  | 0  | European         | 1           | 0           |
| CCNA1 | chr13 | 36437705  | chr13_36437705_G_A  | G | A | 2   | 1  | 1  | African American | 1           | 0           |
| CCNA1 | chr13 | 36437713  | rs763352839         | C | G | 2   | 0  | 2  | Latin American 2 | 1           | 0           |
| CCNA1 | chr13 | 36437737  | chr13_36437737_G_A  | G | A | 2   | 0  | 2  | Latin American 1 | 1           | 0           |
| CCNA1 | chr13 | 36437756  | rs61733784          | T | A | 14  | 4  | 10 | European         | 1           | 0           |
| CCNA1 | chr13 | 36437783  | rs143100244         | C | T | 2   | 1  | 1  | East Asian       | 0.5         | 0.5         |
| CCNA1 | chr13 | 36437789  | rs540179877         | G | A | 7   | 0  | 7  | South Asian      | 1           | 0           |
| CCNA1 | chr13 | 36437839  | rs368185225         | A | G | 2   | 1  | 1  | European         | 1           | 0           |
| CCNA1 | chr13 | 36438683  | rs376677628         | C | T | 25  | 5  | 20 | European         | 0.52        | 0.6112      |
| CCNA1 | chr13 | 36438729  | rs78810484          | T | G | 102 | 12 | 90 | European         | 0.980392157 | 0.038638985 |
| CCNA1 | chr13 | 36438732  | rs200577481         | A | G | 75  | 9  | 66 | European         | 0.986666667 | 0.026311111 |
| CCNA1 | chr13 | 36438735  | rs770432581         | T | G | 16  | 2  | 14 | European         | 1           | 0           |
| CCNA1 | chr13 | 36438741  | rs202149829         | A | G | 4   | 0  | 4  | European         | 1           | 0           |
| CCNA1 | chr13 | 36438777  | chr13_36438777_C_G  | C | G | 2   | 0  | 2  | East Asian       | 1           | 0           |
| CCNA1 | chr13 | 36438787  | rs764214378         | C | A | 2   | 0  | 2  | Latin American 1 | 0.5         | 0.5         |
| CCNA1 | chr13 | 36439992  | rs370143844         | A | T | 4   | 1  | 3  | African American | 0.75        | 0.375       |
| CCNA1 | chr13 | 36440050  | rs140946240         | G | A | 132 | 36 | 96 | African American | 0.5         | 0.623163453 |
| CCNA1 | chr13 | 36440118  | rs61755282          | A | G | 41  | 13 | 28 | European         | 0.609756098 | 0.57584771  |
| CCNA1 | chr13 | 36440120  | rs199981149         | C | A | 7   | 2  | 5  | European         | 1           | 0           |
| CCNA1 | chr13 | 36440122  | rs1386172023        | A | G | 2   | 1  | 1  | Native American  | 1           | 0           |
| CCNA1 | chr13 | 36440150  | rs756868331         | A | C | 5   | 2  | 3  | European         | 0.4         | 0.64        |

|         |       |           |                     |      |   |     |     |     |                  |             |             |
|---------|-------|-----------|---------------------|------|---|-----|-----|-----|------------------|-------------|-------------|
| CCNA1   | chr13 | 36441121  | rs749179710         | G    | A | 2   | 1   | 1   | European         | 0.5         | 0.5         |
| CCNA1   | chr13 | 36441163  | rs145699331         | T    | C | 2   | 0   | 2   | European         | 1           | 0           |
| CCNA1   | chr13 | 36442208  | rs768461226         | G    | A | 2   | 0   | 2   | European         | 1           | 0           |
| CCNA1   | chr13 | 36442244  | rs145685321         | C    | T | 4   | 3   | 1   | European         | 0.5         | 0.5         |
| CCNA1   | chr13 | 36442256  | rs760364496         | T    | A | 4   | 3   | 1   | European         | 1           | 0           |
| CCNA1   | chr13 | 36442258  | rs1316745879        | C    | A | 3   | 3   | 0   | European         | 0.666666667 | 0.444444444 |
| CCNA1   | chr13 | 36442265  | rs765204259         | G    | A | 8   | 1   | 7   | European         | 0.875       | 0.21875     |
| CCNA1   | chr13 | 36442648  | rs773213910         | GTTC | G | 9   | 1   | 8   | Latin American 1 | 0.777777778 | 0.37037037  |
| ARGLU1  | chr13 | 106557121 | rs1055347143        | C    | T | 2   | 0   | 2   | European         | 0.5         | 0.5         |
| ARGLU1  | chr13 | 106559445 | rs762450750         | T    | C | 6   | 4   | 2   | Latin American 1 | 1           | 0           |
| ARGLU1  | chr13 | 106559449 | rs199711363         | C    | T | 33  | 14  | 19  | European         | 0.96969697  | 0.058769513 |
| ARGLU1  | chr13 | 106567693 | rs200685505         | G    | A | 25  | 8   | 17  | European         | 0.8         | 0.32        |
| ARGLU1  | chr13 | 106567726 | chr13_106567726_A_C | A    | C | 701 | 114 | 587 | European         | 0.587731812 | 0.616213642 |
| ARGLU1  | chr13 | 106567733 | chr13_106567733_T_G | T    | G | 61  | 4   | 57  | Latin American 1 | 0.508196721 | 0.649287826 |
| ARGLU1  | chr13 | 106567754 | rs898645477         | A    | C | 162 | 28  | 134 | European         | 0.574074074 | 0.615988416 |
| ARGLU1  | chr13 | 106567849 | chr13_106567849_C_T | C    | T | 3   | 0   | 3   | European         | 1           | 0           |
| ARGLU1  | chr13 | 106567889 | rs1208491821        | G    | C | 2   | 1   | 1   | European         | 1           | 0           |
| ARGLU1  | chr13 | 106567915 | rs755775967         | C    | A | 2   | 0   | 2   | European         | 1           | 0           |
| TRAV1-1 | chr14 | 21621908  | rs1375553965        | G    | A | 3   | 2   | 1   | European         | 1           | 0           |
| TRAV1-1 | chr14 | 21622397  | rs769720951         | C    | G | 8   | 3   | 5   | Latin American 1 | 0.875       | 0.21875     |
| TRAV1-1 | chr14 | 21622477  | chr14_21622477_C_A  | C    | A | 227 | 21  | 206 | European         | 0.740088106 | 0.43307652  |
| MYH6    | chr14 | 23382051  | rs878854503         | C    | T | 2   | 0   | 2   | European         | 0.5         | 0.5         |
| MYH6    | chr14 | 23382055  | rs372265811         | C    | A | 2   | 1   | 1   | East Asian       | 0.5         | 0.5         |
| MYH6    | chr14 | 23382481  | rs754649208         | C    | T | 2   | 2   | 0   | African American | 0.5         | 0.5         |
| MYH6    | chr14 | 23382489  | rs373076710         | G    | A | 2   | 0   | 2   | African American | 0.5         | 0.5         |
| MYH6    | chr14 | 23382528  | rs61731171          | C    | T | 14  | 7   | 7   | Latin American 1 | 0.857142857 | 0.255102041 |
| MYH6    | chr14 | 23382532  | rs762923098         | A    | G | 6   | 0   | 6   | South Asian      | 1           | 0           |
| MYH6    | chr14 | 23382534  | rs765849175         | T    | C | 5   | 1   | 4   | Latin American 2 | 1           | 0           |
| MYH6    | chr14 | 23382557  | rs1415232837        | C    | G | 4   | 1   | 3   | Latin American 2 | 0.5         | 0.5         |
| MYH6    | chr14 | 23383226  | rs767096302         | G    | A | 3   | 1   | 2   | European         | 1           | 0           |
| MYH6    | chr14 | 23383241  | rs199755234         | C    | T | 6   | 0   | 6   | European         | 0.333333333 | 0.722222222 |
| MYH6    | chr14 | 23383244  | rs750886219         | T    | C | 3   | 0   | 3   | African American | 0.666666667 | 0.444444444 |
| MYH6    | chr14 | 23383259  | rs201919534         | T    | C | 12  | 7   | 5   | African American | 0.583333333 | 0.583333333 |
| MYH6    | chr14 | 23383292  | rs138720701         | C    | T | 5   | 2   | 3   | Latin American 1 | 0.6         | 0.48        |
| MYH6    | chr14 | 23383293  | rs759499155         | G    | A | 2   | 1   | 1   | European         | 0.5         | 0.5         |
| MYH6    | chr14 | 23383300  | rs544009955         | G    | C | 2   | 1   | 1   | Latin American 1 | 0.5         | 0.5         |
| MYH6    | chr14 | 23384488  | rs373629059         | T    | C | 12  | 6   | 6   | Latin American 1 | 0.75        | 0.375       |
| MYH6    | chr14 | 23384494  | rs747673552         | G    | A | 2   | 0   | 2   | Latin American 2 | 1           | 0           |
| MYH6    | chr14 | 23384506  | rs202132499         | C    | T | 4   | 2   | 2   | Latin American 2 | 0.75        | 0.375       |
| MYH6    | chr14 | 23384507  | rs137923514         | G    | A | 2   | 1   | 1   | East Asian       | 0.5         | 0.5         |
| MYH6    | chr14 | 23384516  | rs367834703         | C    | T | 2   | 2   | 0   | European         | 1           | 0           |
| MYH6    | chr14 | 23384530  | rs200260229         | C    | T | 32  | 15  | 17  | European         | 0.4375      | 0.671875    |
| MYH6    | chr14 | 23384531  | rs202141059         | C    | T | 32  | 15  | 17  | European         | 0.4375      | 0.671875    |
| MYH6    | chr14 | 23384542  | rs1298835458        | C    | T | 3   | 1   | 2   | Latin American 1 | 1           | 0           |
| MYH6    | chr14 | 23384548  | rs371222772         | C    | T | 3   | 0   | 3   | South Asian      | 1           | 0           |
| MYH6    | chr14 | 23384549  | rs111473291         | G    | A | 6   | 2   | 4   | European         | 0.333333333 | 0.722222222 |

|      |       |          |                    |   |   |     |     |     |                  |             |             |
|------|-------|----------|--------------------|---|---|-----|-----|-----|------------------|-------------|-------------|
| MYH6 | chr14 | 23384597 | rs144571463        | G | T | 25  | 6   | 19  | South Asian      | 0.36        | 0.7136      |
| MYH6 | chr14 | 23384614 | rs759281871        | C | T | 2   | 1   | 1   | European         | 1           | 0           |
| MYH6 | chr14 | 23384659 | rs745473249        | C | T | 4   | 0   | 4   | East Asian       | 0.75        | 0.375       |
| MYH6 | chr14 | 23384671 | rs769271404        | G | T | 2   | 0   | 2   | European         | 1           | 0           |
| MYH6 | chr14 | 23384672 | chr14_23384672_C_T | C | T | 2   | 1   | 1   | European         | 0.5         | 0.5         |
| MYH6 | chr14 | 23384714 | rs397516775        | C | T | 6   | 2   | 4   | European         | 0.666666667 | 0.5         |
| MYH6 | chr14 | 23384948 | rs142437308        | C | G | 2   | 1   | 1   | African American | 0.5         | 0.5         |
| MYH6 | chr14 | 23385004 | rs151324358        | G | A | 10  | 0   | 10  | African American | 0.4         | 0.74        |
| MYH6 | chr14 | 23385034 | chr14_23385034_C_T | C | T | 2   | 0   | 2   | AFR              | 1           | 0           |
| MYH6 | chr14 | 23385954 | rs369275573        | C | G | 2   | 2   | 0   | European         | 1           | 0           |
| MYH6 | chr14 | 23385956 | rs201383498        | C | A | 4   | 0   | 4   | European         | 1           | 0           |
| MYH6 | chr14 | 23385981 | rs1419664066       | C | T | 3   | 0   | 3   | Latin American 2 | 1           | 0           |
| MYH6 | chr14 | 23385989 | rs762103586        | C | T | 3   | 0   | 3   | African American | 0.333333333 | 0.666666667 |
| MYH6 | chr14 | 23385996 | rs766345714        | G | A | 3   | 1   | 2   | African American | 0.666666667 | 0.444444444 |
| MYH6 | chr14 | 23386014 | rs373457153        | C | T | 7   | 3   | 4   | European         | 0.857142857 | 0.244897959 |
| MYH6 | chr14 | 23386020 | rs745747137        | G | A | 5   | 1   | 4   | East Asian       | 1           | 0           |
| MYH6 | chr14 | 23386056 | rs921540558        | G | A | 2   | 1   | 1   | European         | 1           | 0           |
| MYH6 | chr14 | 23386065 | rs773755388        | C | T | 39  | 14  | 25  | Latin American 1 | 0.871794872 | 0.228796844 |
| MYH6 | chr14 | 23386071 | rs534560839        | C | T | 3   | 1   | 2   | South Asian      | 0.666666667 | 0.444444444 |
| MYH6 | chr14 | 23386089 | rs200884672        | C | T | 2   | 1   | 1   | European         | 1           | 0           |
| MYH6 | chr14 | 23386092 | rs758251388        | C | T | 3   | 0   | 3   | African American | 1           | 0           |
| MYH6 | chr14 | 23386098 | rs374271404        | C | T | 3   | 2   | 1   | African American | 0.666666667 | 0.444444444 |
| MYH6 | chr14 | 23386100 | rs778287981        | C | T | 11  | 2   | 9   | Latin American 1 | 0.636363636 | 0.512396694 |
| MYH6 | chr14 | 23386106 | rs773445582        | G | A | 2   | 1   | 1   | African American | 0.5         | 0.5         |
| MYH6 | chr14 | 23386331 | rs1321593074       | A | G | 2   | 0   | 2   | European         | 0.5         | 0.5         |
| MYH6 | chr14 | 23386368 | rs149460065        | G | A | 60  | 16  | 44  | African American | 0.5         | 0.605       |
| MYH6 | chr14 | 23386400 | rs776765616        | T | C | 2   | 0   | 2   | European         | 0.5         | 0.5         |
| MYH6 | chr14 | 23386416 | chr14_23386416_T_G | T | G | 5   | 4   | 1   | Latin American 1 | 1           | 0           |
| MYH6 | chr14 | 23386446 | rs780726611        | G | A | 3   | 2   | 1   | European         | 1           | 0           |
| MYH6 | chr14 | 23386451 | rs747494958        | C | T | 4   | 1   | 3   | European         | 0.5         | 0.625       |
| MYH6 | chr14 | 23386452 | rs201683868        | G | A | 19  | 12  | 7   | Latin American 1 | 0.789473684 | 0.349030471 |
| MYH6 | chr14 | 23386502 | rs200751434        | T | C | 17  | 1   | 16  | Latin American 1 | 1           | 0           |
| MYH6 | chr14 | 23386506 | rs544624250        | G | T | 14  | 4   | 10  | Latin American 1 | 0.714285714 | 0.459183673 |
| MYH6 | chr14 | 23386524 | rs1280321639       | C | T | 2   | 0   | 2   | European         | 1           | 0           |
| MYH6 | chr14 | 23386527 | rs397516771        | C | T | 3   | 0   | 3   | European         | 0.666666667 | 0.444444444 |
| MYH6 | chr14 | 23386548 | rs775263766        | G | A | 4   | 2   | 2   | European         | 0.75        | 0.375       |
| MYH6 | chr14 | 23386551 | rs371067114        | C | T | 2   | 1   | 1   | African American | 0.5         | 0.5         |
| MYH6 | chr14 | 23386554 | rs1195066266       | T | A | 2   | 0   | 2   | Latin American 2 | 1           | 0           |
| MYH6 | chr14 | 23386570 | rs149771264        | G | T | 4   | 2   | 2   | European         | 0.75        | 0.375       |
| MYH6 | chr14 | 23386589 | rs371068881        | C | T | 3   | 1   | 2   | European         | 0.666666667 | 0.444444444 |
| MYH6 | chr14 | 23386590 | rs756237624        | G | A | 5   | 1   | 4   | African American | 0.4         | 0.64        |
| MYH6 | chr14 | 23386608 | rs148582147        | C | G | 54  | 27  | 27  | European         | 0.351851852 | 0.75308642  |
| MYH6 | chr14 | 23386608 | chr14_23386608_C_T | C | T | 3   | 1   | 2   | Latin American 2 | 0.666666667 | 0.444444444 |
| MYH6 | chr14 | 23386616 | chr14_23386616_A_T | A | T | 500 | 226 | 274 | European         | 0.4         | 0.743072    |
| MYH6 | chr14 | 23386620 | chr14_23386620_A_T | A | T | 414 | 185 | 229 | European         | 0.40821256  | 0.741907629 |
| MYH6 | chr14 | 23387577 | rs199600772        | C | G | 3   | 2   | 1   | European         | 1           | 0           |

|      |       |          |                    |   |   |     |    |     |                  |             |             |
|------|-------|----------|--------------------|---|---|-----|----|-----|------------------|-------------|-------------|
| MYH6 | chr14 | 23387584 | rs34330111         | C | A | 34  | 9  | 25  | African American | 0.470588235 | 0.678200692 |
| MYH6 | chr14 | 23387585 | rs201827489        | G | A | 3   | 0  | 3   | European         | 1           | 0           |
| MYH6 | chr14 | 23387606 | rs900579440        | C | T | 5   | 2  | 3   | African American | 0.8         | 0.32        |
| MYH6 | chr14 | 23387778 | rs199936506        | C | T | 26  | 7  | 19  | European         | 0.615384615 | 0.582840237 |
| MYH6 | chr14 | 23387845 | rs930701630        | T | C | 2   | 1  | 1   | European         | 1           | 0           |
| MYH6 | chr14 | 23387853 | rs147586142        | C | T | 2   | 1  | 1   | African American | 0.5         | 0.5         |
| MYH6 | chr14 | 23387854 | rs201989347        | G | A | 4   | 1  | 3   | European         | 0.75        | 0.375       |
| MYH6 | chr14 | 23387914 | rs267606905        | C | T | 3   | 1  | 2   | African American | 0.333333333 | 0.666666667 |
| MYH6 | chr14 | 23388169 | rs766943407        | T | C | 3   | 0  | 3   | East Asian       | 1           | 0           |
| MYH6 | chr14 | 23388186 | rs727503234        | G | T | 8   | 6  | 2   | European         | 1           | 0           |
| MYH6 | chr14 | 23388207 | rs142556730        | C | T | 6   | 1  | 5   | European         | 0.666666667 | 0.5         |
| MYH6 | chr14 | 23388208 | rs746893658        | G | A | 2   | 1  | 1   | European         | 1           | 0           |
| MYH6 | chr14 | 23388221 | rs201016285        | C | T | 129 | 22 | 107 | Latin American 2 | 0.720930233 | 0.406586143 |
| MYH6 | chr14 | 23388249 | rs574433291        | C | T | 7   | 2  | 5   | South Asian      | 0.714285714 | 0.408163265 |
| MYH6 | chr14 | 23388250 | rs200465713        | G | A | 3   | 0  | 3   | African American | 0.666666667 | 0.444444444 |
| MYH6 | chr14 | 23388283 | rs146172839        | C | T | 4   | 0  | 4   | East Asian       | 1           | 0           |
| MYH6 | chr14 | 23388298 | rs201566738        | C | T | 3   | 2  | 1   | Latin American 1 | 1           | 0           |
| MYH6 | chr14 | 23388321 | rs150815925        | C | T | 28  | 11 | 17  | European         | 0.785714286 | 0.367346939 |
| MYH6 | chr14 | 23388322 | rs374022661        | G | A | 7   | 3  | 4   | Latin American 1 | 0.714285714 | 0.448979592 |
| MYH6 | chr14 | 23388884 | rs763926580        | G | A | 3   | 1  | 2   | Latin American 1 | 0.666666667 | 0.444444444 |
| MYH6 | chr14 | 23388885 | rs1471592617       | C | G | 2   | 0  | 2   | Latin American 1 | 1           | 0           |
| MYH6 | chr14 | 23388893 | rs753774406        | C | T | 2   | 1  | 1   | European         | 1           | 0           |
| MYH6 | chr14 | 23388898 | rs145611185        | G | A | 29  | 12 | 17  | European         | 0.896551724 | 0.190249703 |
| MYH6 | chr14 | 23388950 | rs768398107        | C | T | 2   | 0  | 2   | AFR              | 0.5         | 0.5         |
| MYH6 | chr14 | 23388952 | rs533942127        | C | T | 2   | 0  | 2   | African American | 0.5         | 0.5         |
| MYH6 | chr14 | 23388986 | rs756392451        | C | T | 2   | 1  | 1   | Latin American 1 | 0.5         | 0.5         |
| MYH6 | chr14 | 23388995 | rs1442784785       | C | T | 2   | 1  | 1   | Latin American 2 | 1           | 0           |
| MYH6 | chr14 | 23388998 | rs372736126        | G | A | 16  | 3  | 13  | European         | 0.9375      | 0.1171875   |
| MYH6 | chr14 | 23389007 | rs761711033        | C | T | 3   | 1  | 2   | African American | 0.333333333 | 0.666666667 |
| MYH6 | chr14 | 23389018 | rs766238876        | C | T | 4   | 0  | 4   | African American | 0.5         | 0.625       |
| MYH6 | chr14 | 23389035 | chr14_23389035_A_T | A | T | 42  | 11 | 31  | European         | 0.285714286 | 0.783446712 |
| MYH6 | chr14 | 23389042 | chr14_23389042_A_T | A | T | 79  | 25 | 54  | African American | 0.265822785 | 0.801794584 |
| MYH6 | chr14 | 23389046 | chr14_23389046_C_G | C | G | 4   | 0  | 4   | Latin American 2 | 0.5         | 0.625       |
| MYH6 | chr14 | 23389054 | rs148558068        | G | A | 15  | 6  | 9   | African American | 0.666666667 | 0.506666667 |
| MYH6 | chr14 | 23389448 | rs776486154        | A | C | 3   | 1  | 2   | African American | 0.333333333 | 0.666666667 |
| MYH6 | chr14 | 23389457 | rs1015940787       | C | T | 3   | 1  | 2   | European         | 0.666666667 | 0.444444444 |
| MYH6 | chr14 | 23389478 | rs368588052        | G | A | 5   | 1  | 4   | European         | 0.8         | 0.32        |
| MYH6 | chr14 | 23389488 | rs34935550         | C | G | 232 | 73 | 159 | European         | 0.461206897 | 0.674791914 |
| MYH6 | chr14 | 23389499 | rs780178869        | C | T | 2   | 0  | 2   | South Asian      | 1           | 0           |
| MYH6 | chr14 | 23389504 | rs138127105        | C | A | 2   | 1  | 1   | East Asian       | 0.5         | 0.5         |
| MYH6 | chr14 | 23389614 | rs762102758        | C | T | 2   | 0  | 2   | European         | 0.5         | 0.5         |
| MYH6 | chr14 | 23389644 | rs371849826        | G | A | 2   | 1  | 1   | European         | 0.5         | 0.5         |
| MYH6 | chr14 | 23389650 | rs777331087        | C | A | 2   | 0  | 2   | South Asian      | 1           | 0           |
| MYH6 | chr14 | 23389665 | rs375819633        | C | T | 8   | 3  | 5   | African American | 0.375       | 0.65625     |
| MYH6 | chr14 | 23389667 | rs544358806        | C | T | 3   | 3  | 0   | African American | 0.333333333 | 0.666666667 |
| MYH6 | chr14 | 23389668 | rs397516763        | G | A | 10  | 0  | 10  | South Asian      | 0.8         | 0.34        |

|      |       |          |                    |   |   |    |    |    |                  |             |             |
|------|-------|----------|--------------------|---|---|----|----|----|------------------|-------------|-------------|
| MYH6 | chr14 | 23389697 | rs759454361        | C | T | 2  | 0  | 2  | East Asian       | 0.5         | 0.5         |
| MYH6 | chr14 | 23390079 | chr14_23390079_A_G | A | G | 2  | 0  | 2  | South Asian      | 1           | 0           |
| MYH6 | chr14 | 23390092 | rs144761217        | C | T | 6  | 0  | 6  | Latin American 1 | 0.666666667 | 0.5         |
| MYH6 | chr14 | 23390170 | rs397516762        | C | T | 6  | 1  | 5  | European         | 1           | 0           |
| MYH6 | chr14 | 23390177 | rs751153777        | C | G | 6  | 3  | 3  | European         | 0.666666667 | 0.5         |
| MYH6 | chr14 | 23390182 | rs753047012        | C | T | 2  | 0  | 2  | African American | 1           | 0           |
| MYH6 | chr14 | 23390185 | rs368451573        | C | T | 12 | 3  | 9  | South Asian      | 0.666666667 | 0.486111111 |
| MYH6 | chr14 | 23390191 | rs372794975        | C | G | 11 | 2  | 9  | African American | 0.454545455 | 0.644628099 |
| MYH6 | chr14 | 23390206 | rs769756450        | G | T | 10 | 1  | 9  | Latin American 2 | 0.7         | 0.48        |
| MYH6 | chr14 | 23390206 | chr14_23390206_G_A | G | A | 3  | 0  | 3  | European         | 0.666666667 | 0.444444444 |
| MYH6 | chr14 | 23390214 | rs765797952        | G | A | 2  | 1  | 1  | African American | 0.5         | 0.5         |
| MYH6 | chr14 | 23390220 | rs759117852        | G | A | 3  | 0  | 3  | European         | 1           | 0           |
| MYH6 | chr14 | 23390227 | rs767223211        | C | T | 3  | 1  | 2  | European         | 0.666666667 | 0.444444444 |
| MYH6 | chr14 | 23390281 | rs727503236        | C | T | 7  | 5  | 2  | European         | 1           | 0           |
| MYH6 | chr14 | 23390284 | rs771879688        | G | A | 3  | 1  | 2  | East Asian       | 1           | 0           |
| MYH6 | chr14 | 23390289 | rs775248044        | T | G | 6  | 2  | 4  | East Asian       | 0.833333333 | 0.277777778 |
| MYH6 | chr14 | 23390341 | rs760399050        | C | G | 2  | 1  | 1  | Latin American 1 | 1           | 0           |
| MYH6 | chr14 | 23390342 | rs564367705        | G | C | 3  | 1  | 2  | European         | 1           | 0           |
| MYH6 | chr14 | 23390361 | rs543585784        | C | T | 5  | 2  | 3  | European         | 0.6         | 0.56        |
| MYH6 | chr14 | 23390362 | rs755209382        | G | A | 4  | 2  | 2  | European         | 0.75        | 0.375       |
| MYH6 | chr14 | 23390376 | rs745801044        | C | T | 6  | 2  | 4  | African American | 0.333333333 | 0.722222222 |
| MYH6 | chr14 | 23390406 | rs376002621        | C | T | 5  | 2  | 3  | African American | 0.6         | 0.56        |
| MYH6 | chr14 | 23390437 | rs750174797        | C | G | 4  | 1  | 3  | Latin American 1 | 1           | 0           |
| MYH6 | chr14 | 23390442 | rs369247906        | C | T | 6  | 2  | 4  | European         | 0.666666667 | 0.5         |
| MYH6 | chr14 | 23390443 | rs372446459        | G | T | 6  | 1  | 5  | European         | 0.833333333 | 0.277777778 |
| MYH6 | chr14 | 23392630 | rs567433969        | G | C | 10 | 3  | 7  | Latin American 1 | 1           | 0           |
| MYH6 | chr14 | 23392647 | rs1022920167       | T | C | 4  | 0  | 4  | European         | 0.5         | 0.625       |
| MYH6 | chr14 | 23392933 | rs377716628        | T | A | 22 | 4  | 18 | African American | 0.545454545 | 0.566115702 |
| MYH6 | chr14 | 23392943 | rs375169402        | C | T | 3  | 2  | 1  | European         | 1           | 0           |
| MYH6 | chr14 | 23392964 | rs145508517        | T | C | 9  | 5  | 4  | African American | 0.555555556 | 0.617283951 |
| MYH6 | chr14 | 23392968 | rs267606904        | C | G | 13 | 3  | 10 | East Asian       | 0.692307692 | 0.426035503 |
| MYH6 | chr14 | 23392999 | rs540893860        | C | T | 8  | 0  | 8  | South Asian      | 0.875       | 0.21875     |
| MYH6 | chr14 | 23393008 | rs750020902        | C | T | 3  | 0  | 3  | Latin American 2 | 0.666666667 | 0.444444444 |
| MYH6 | chr14 | 23393024 | rs755565288        | G | A | 3  | 1  | 2  | African American | 0.666666667 | 0.444444444 |
| MYH6 | chr14 | 23393028 | rs758449996        | C | A | 2  | 0  | 2  | European         | 1           | 0           |
| MYH6 | chr14 | 23393437 | rs143978652        | C | A | 78 | 24 | 54 | European         | 0.487179487 | 0.655161078 |
| MYH6 | chr14 | 23393473 | rs779051645        | C | T | 2  | 0  | 2  | European         | 0.5         | 0.5         |
| MYH6 | chr14 | 23393473 | chr14_23393473_C_A | C | A | 2  | 0  | 2  | European         | 1           | 0           |
| MYH6 | chr14 | 23393478 | rs766362714        | A | T | 2  | 1  | 1  | European         | 1           | 0           |
| MYH6 | chr14 | 23393496 | rs202028680        | A | G | 2  | 1  | 1  | African American | 1           | 0           |
| MYH6 | chr14 | 23393704 | rs144907522        | C | A | 68 | 19 | 49 | African American | 0.558823529 | 0.592128028 |
| MYH6 | chr14 | 23393748 | rs148234492        | C | T | 2  | 2  | 0  | African American | 1           | 0           |
| MYH6 | chr14 | 23393752 | rs538791600        | C | T | 2  | 0  | 2  | South Asian      | 1           | 0           |
| MYH6 | chr14 | 23393766 | rs766640013        | C | T | 2  | 1  | 1  | East Asian       | 0.5         | 0.5         |
| MYH6 | chr14 | 23393767 | rs368912844        | G | A | 2  | 2  | 0  | European         | 1           | 0           |
| MYH6 | chr14 | 23393787 | rs199838024        | G | A | 4  | 1  | 3  | European         | 0.75        | 0.375       |

|      |       |          |                    |   |   |     |     |     |                  |             |             |
|------|-------|----------|--------------------|---|---|-----|-----|-----|------------------|-------------|-------------|
| MYH6 | chr14 | 23393788 | rs141704264        | C | A | 413 | 130 | 283 | African American | 0.535108959 | 0.594562904 |
| MYH6 | chr14 | 23393788 | chr14_23393788_C_T | C | T | 2   | 0   | 2   | European         | 0.5         | 0.5         |
| MYH6 | chr14 | 23393804 | rs934343235        | A | T | 2   | 1   | 1   | African American | 1           | 0           |
| MYH6 | chr14 | 23393823 | rs746669440        | A | G | 2   | 0   | 2   | AFR              | 1           | 0           |
| MYH6 | chr14 | 23393852 | rs1312659522       | C | A | 2   | 2   | 0   | European         | 1           | 0           |
| MYH6 | chr14 | 23393856 | rs138213182        | T | C | 4   | 1   | 3   | African American | 1           | 0           |
| MYH6 | chr14 | 23393872 | rs758061689        | C | T | 3   | 1   | 2   | European         | 0.666666667 | 0.444444444 |
| MYH6 | chr14 | 23393877 | rs527636904        | C | T | 6   | 1   | 5   | European         | 0.666666667 | 0.444444444 |
| MYH6 | chr14 | 23393893 | chr14_23393893_T_G | T | G | 5   | 0   | 5   | Latin American 1 | 0.6         | 0.56        |
| MYH6 | chr14 | 23394069 | rs1372933415       | G | A | 2   | 0   | 2   | European         | 1           | 0           |
| MYH6 | chr14 | 23394138 | rs773162706        | C | T | 8   | 0   | 8   | European         | 0.875       | 0.21875     |
| MYH6 | chr14 | 23394139 | rs201193346        | G | A | 18  | 1   | 17  | European         | 0.833333333 | 0.290123457 |
| MYH6 | chr14 | 23394142 | rs376682837        | G | A | 8   | 3   | 5   | European         | 0.625       | 0.46875     |
| MYH6 | chr14 | 23394148 | rs774144472        | C | T | 2   | 0   | 2   | African American | 0.5         | 0.5         |
| MYH6 | chr14 | 23394153 | rs143284278        | T | C | 2   | 0   | 2   | African American | 1           | 0           |
| MYH6 | chr14 | 23394162 | rs200153625        | G | A | 7   | 1   | 6   | European         | 0.428571429 | 0.653061224 |
| MYH6 | chr14 | 23394172 | chr14_23394172_T_G | T | G | 2   | 0   | 2   | AFR              | 0.5         | 0.5         |
| MYH6 | chr14 | 23394174 | rs115845031        | C | T | 252 | 80  | 172 | African American | 0.599206349 | 0.558421517 |
| MYH6 | chr14 | 23394175 | rs1025146248       | G | A | 4   | 1   | 3   | European         | 0.75        | 0.375       |
| MYH6 | chr14 | 23394178 | rs369274077        | C | T | 3   | 0   | 3   | European         | 1           | 0           |
| MYH6 | chr14 | 23394213 | rs759408374        | G | A | 6   | 1   | 5   | European         | 0.833333333 | 0.277777778 |
| MYH6 | chr14 | 23394289 | rs138419275        | C | T | 25  | 10  | 15  | East Asian       | 1           | 0           |
| MYH6 | chr14 | 23394292 | rs1348126724       | G | A | 3   | 1   | 2   | Latin American 1 | 1           | 0           |
| MYH6 | chr14 | 23394313 | rs150675144        | G | T | 5   | 2   | 3   | European         | 1           | 0           |
| MYH6 | chr14 | 23396287 | rs780036697        | C | T | 3   | 1   | 2   | African American | 0.333333333 | 0.666666667 |
| MYH6 | chr14 | 23396312 | rs75487328         | T | C | 5   | 2   | 3   | Latin American 1 | 0.8         | 0.32        |
| MYH6 | chr14 | 23396314 | rs535438755        | C | T | 3   | 1   | 2   | East Asian       | 0.333333333 | 0.666666667 |
| MYH6 | chr14 | 23396316 | rs199993769        | C | T | 3   | 1   | 2   | East Asian       | 1           | 0           |
| MYH6 | chr14 | 23396329 | rs267606907        | C | T | 4   | 1   | 3   | East Asian       | 0.75        | 0.375       |
| MYH6 | chr14 | 23396330 | rs202120238        | G | A | 6   | 2   | 4   | European         | 1           | 0           |
| MYH6 | chr14 | 23396348 | rs200925880        | G | A | 2   | 0   | 2   | African American | 0.5         | 0.5         |
| MYH6 | chr14 | 23396350 | rs746758304        | G | A | 5   | 1   | 4   | East Asian       | 0.6         | 0.56        |
| MYH6 | chr14 | 23396360 | rs543524943        | G | A | 2   | 0   | 2   | European         | 1           | 0           |
| MYH6 | chr14 | 23396377 | rs1486610243       | C | T | 2   | 0   | 2   | African American | 0.5         | 0.5         |
| MYH6 | chr14 | 23396728 | rs369729808        | A | G | 5   | 2   | 3   | Latin American 1 | 0.8         | 0.32        |
| MYH6 | chr14 | 23396797 | rs763963623        | A | G | 2   | 1   | 1   | European         | 1           | 0           |
| MYH6 | chr14 | 23396812 | rs781467923        | C | T | 2   | 0   | 2   | African American | 0.5         | 0.5         |
| MYH6 | chr14 | 23396969 | rs770907731        | C | T | 2   | 1   | 1   | East Asian       | 0.5         | 0.5         |
| MYH6 | chr14 | 23396970 | rs387906656        | G | A | 2   | 2   | 0   | European         | 0.5         | 0.5         |
| MYH6 | chr14 | 23396991 | rs761520417        | G | A | 2   | 0   | 2   | European         | 0.5         | 0.5         |
| MYH6 | chr14 | 23397005 | rs1221259755       | T | C | 2   | 1   | 1   | East Asian       | 0.5         | 0.5         |
| MYH6 | chr14 | 23397018 | rs767124357        | G | A | 4   | 2   | 2   | African American | 0.25        | 0.75        |
| MYH6 | chr14 | 23397060 | rs148915045        | C | T | 167 | 57  | 110 | African American | 0.592814371 | 0.536627344 |
| MYH6 | chr14 | 23397066 | rs748016197        | G | T | 2   | 0   | 2   | African American | 1           | 0           |
| MYH6 | chr14 | 23397067 | rs769708956        | G | T | 3   | 0   | 3   | South Asian      | 1           | 0           |
| MYH6 | chr14 | 23397181 | rs551746815        | C | T | 5   | 2   | 3   | Latin American 1 | 0.4         | 0.64        |

|      |       |          |                    |      |   |     |    |     |                  |             |             |
|------|-------|----------|--------------------|------|---|-----|----|-----|------------------|-------------|-------------|
| MYH6 | chr14 | 23397202 | rs1023327699       | C    | T | 2   | 0  | 2   | East Asian       | 1           | 0           |
| MYH6 | chr14 | 23397212 | rs754199269        | G    | A | 3   | 0  | 3   | Latin American 2 | 0.666666667 | 0.444444444 |
| MYH6 | chr14 | 23397545 | chr14_23397545_G_A | G    | A | 3   | 1  | 2   | European         | 1           | 0           |
| MYH6 | chr14 | 23398734 | rs180904654        | C    | T | 17  | 7  | 10  | East Asian       | 0.764705882 | 0.394463668 |
| MYH6 | chr14 | 23398745 | rs1183656896       | TAGG | T | 2   | 0  | 2   | European         | 0.5         | 0.5         |
| MYH6 | chr14 | 23398751 | rs764362016        | G    | A | 4   | 0  | 4   | South Asian      | 0.75        | 0.375       |
| MYH6 | chr14 | 23398856 | rs142992009        | T    | G | 103 | 39 | 64  | European         | 0.844660194 | 0.279385427 |
| MYH6 | chr14 | 23398866 | rs150415679        | C    | T | 16  | 5  | 11  | European         | 0.5625      | 0.5703125   |
| MYH6 | chr14 | 23398916 | rs376291577        | C    | T | 2   | 0  | 2   | Latin American 1 | 0.5         | 0.5         |
| MYH6 | chr14 | 23398917 | rs149650190        | G    | A | 20  | 6  | 14  | Latin American 1 | 0.9         | 0.18        |
| MYH6 | chr14 | 23398956 | rs730880149        | C    | T | 4   | 2  | 2   | European         | 0.5         | 0.625       |
| MYH6 | chr14 | 23398991 | rs367663906        | T    | C | 3   | 2  | 1   | European         | 1           | 0           |
| MYH6 | chr14 | 23400316 | rs142410102        | A    | C | 6   | 3  | 3   | African American | 0.833333333 | 0.277777778 |
| MYH6 | chr14 | 23400351 | rs761085263        | C    | T | 3   | 0  | 3   | Latin American 2 | 0.666666667 | 0.444444444 |
| MYH6 | chr14 | 23400711 | rs777651128        | C    | T | 3   | 0  | 3   | Latin American 1 | 1           | 0           |
| MYH6 | chr14 | 23400759 | rs1425571023       | G    | A | 2   | 2  | 0   | African American | 0.5         | 0.5         |
| MYH6 | chr14 | 23400772 | rs142059069        | C    | A | 12  | 3  | 9   | Latin American 1 | 0.833333333 | 0.291666667 |
| MYH6 | chr14 | 23400783 | rs556536964        | C    | T | 3   | 1  | 2   | East Asian       | 1           | 0           |
| MYH6 | chr14 | 23400791 | rs202096001        | C    | T | 4   | 0  | 4   | European         | 0.5         | 0.5         |
| MYH6 | chr14 | 23400792 | rs182373896        | G    | A | 2   | 1  | 1   | European         | 1           | 0           |
| MYH6 | chr14 | 23400794 | rs757040426        | G    | A | 3   | 0  | 3   | East Asian       | 1           | 0           |
| MYH6 | chr14 | 23400854 | chr14_23400854_T_C | T    | C | 2   | 0  | 2   | European         | 0.5         | 0.5         |
| MYH6 | chr14 | 23400867 | rs147606900        | C    | T | 6   | 1  | 5   | East Asian       | 0.5         | 0.611111111 |
| MYH6 | chr14 | 23400868 | chr14_23400868_G_T | G    | T | 2   | 0  | 2   | European         | 0.5         | 0.5         |
| MYH6 | chr14 | 23400875 | rs759520932        | C    | G | 10  | 8  | 2   | European         | 0.5         | 0.58        |
| MYH6 | chr14 | 23400876 | rs576432451        | C    | T | 11  | 0  | 11  | South Asian      | 1           | 0           |
| MYH6 | chr14 | 23400934 | chr14_23400934_G_T | G    | T | 2   | 1  | 1   | European         | 1           | 0           |
| MYH6 | chr14 | 23400948 | rs869025472        | G    | T | 3   | 1  | 2   | European         | 1           | 0           |
| MYH6 | chr14 | 23400963 | rs146468868        | C    | T | 2   | 0  | 2   | African American | 1           | 0           |
| MYH6 | chr14 | 23402466 | rs747070258        | T    | G | 4   | 2  | 2   | Latin American 2 | 0.75        | 0.375       |
| MYH6 | chr14 | 23402473 | rs148962966        | C    | T | 59  | 14 | 45  | East Asian       | 0.661016949 | 0.459063488 |
| MYH6 | chr14 | 23402474 | rs61742472         | G    | C | 155 | 55 | 100 | African American | 0.483870968 | 0.61710718  |
| MYH6 | chr14 | 23402497 | rs753444140        | G    | A | 3   | 2  | 1   | Latin American 1 | 0.666666667 | 0.444444444 |
| MYH6 | chr14 | 23402517 | rs150272218        | A    | G | 2   | 1  | 1   | African American | 1           | 0           |
| MYH6 | chr14 | 23402518 | rs202196487        | T    | A | 14  | 5  | 9   | East Asian       | 1           | 0           |
| MYH6 | chr14 | 23402557 | rs200260629        | C    | T | 12  | 8  | 4   | African American | 0.583333333 | 0.569444444 |
| MYH6 | chr14 | 23402598 | rs138572790        | G    | C | 5   | 2  | 3   | European         | 1           | 0           |
| MYH6 | chr14 | 23402697 | rs371859345        | A    | T | 2   | 1  | 1   | African American | 1           | 0           |
| MYH6 | chr14 | 23402706 | rs112677696        | C    | T | 3   | 0  | 3   | African American | 0.666666667 | 0.444444444 |
| MYH6 | chr14 | 23402717 | rs144422878        | C    | T | 4   | 1  | 3   | African American | 0.5         | 0.5         |
| MYH6 | chr14 | 23402759 | rs1260228019       | C    | T | 3   | 1  | 2   | European         | 0.666666667 | 0.444444444 |
| MYH6 | chr14 | 23402762 | rs576034003        | A    | C | 5   | 1  | 4   | Latin American 1 | 0.6         | 0.56        |
| MYH6 | chr14 | 23402771 | rs374692396        | C    | T | 4   | 2  | 2   | African American | 0.75        | 0.375       |
| MYH6 | chr14 | 23403415 | rs140660481        | C    | A | 29  | 12 | 17  | European         | 0.689655172 | 0.475624257 |
| MYH6 | chr14 | 23403422 | rs201327273        | A    | T | 19  | 4  | 15  | European         | 0.736842105 | 0.421052632 |
| MYH6 | chr14 | 23403758 | rs750341311        | G    | C | 2   | 0  | 2   | European         | 1           | 0           |

|      |       |          |                     |    |    |     |     |     |                  |             |             |
|------|-------|----------|---------------------|----|----|-----|-----|-----|------------------|-------------|-------------|
| MYH6 | chr14 | 23404300 | rs200645920         | C  | T  | 2   | 0   | 2   | AFR              | 0.5         | 0.5         |
| MYH6 | chr14 | 23404319 | rs576154116         | G  | A  | 4   | 1   | 3   | Native American  | 0.5         | 0.625       |
| MYH6 | chr14 | 23404340 | rs199916773         | A  | G  | 4   | 1   | 3   | East Asian       | 1           | 0           |
| MYH6 | chr14 | 23404352 | rs201828188         | C  | T  | 17  | 6   | 11  | Latin American 1 | 0.882352941 | 0.214532872 |
| MYH6 | chr14 | 23404718 | rs780456381         | G  | A  | 3   | 0   | 3   | European         | 1           | 0           |
| MYH6 | chr14 | 23404720 | rs886039039         | A  | T  | 2   | 1   | 1   | East Asian       | 1           | 0           |
| MYH6 | chr14 | 23404731 | rs142027794         | C  | T  | 375 | 123 | 252 | European         | 0.650666667 | 0.527758222 |
| MYH6 | chr14 | 23405232 | rs972242173         | T  | A  | 2   | 0   | 2   | European         | 0.5         | 0.5         |
| MYH6 | chr14 | 23405250 | rs369931610         | C  | T  | 2   | 0   | 2   | African American | 0.5         | 0.5         |
| MYH6 | chr14 | 23405258 | rs372298082         | G  | C  | 2   | 1   | 1   | African American | 1           | 0           |
| MYH6 | chr14 | 23405294 | rs199923533         | C  | T  | 2   | 0   | 2   | European         | 1           | 0           |
| MYH6 | chr14 | 23405321 | rs763885051         | T  | C  | 2   | 1   | 1   | African American | 0.5         | 0.5         |
| MYH6 | chr14 | 23405643 | rs149454728         | G  | A  | 3   | 1   | 2   | African American | 0.666666667 | 0.444444444 |
| MYH6 | chr14 | 23405659 | rs750029272         | G  | T  | 4   | 0   | 4   | South Asian      | 1           | 0           |
| MYH6 | chr14 | 23405668 | rs762688602         | G  | T  | 2   | 2   | 0   | Latin American 2 | 1           | 0           |
| MYH6 | chr14 | 23405680 | rs140596256         | C  | T  | 21  | 7   | 14  | European         | 0.952380952 | 0.090702948 |
| MYH6 | chr14 | 23405727 | rs529427223         | G  | A  | 5   | 0   | 5   | South Asian      | 1           | 0           |
| MYH6 | chr14 | 23405739 | rs772216708         | T  | C  | 3   | 1   | 2   | European         | 0.666666667 | 0.444444444 |
| MYH6 | chr14 | 23405746 | rs977234074         | C  | T  | 2   | 1   | 1   | African American | 1           | 0           |
| MYH6 | chr14 | 23405760 | rs769686237         | A  | G  | 2   | 1   | 1   | European         | 1           | 0           |
| MYH6 | chr14 | 23407034 | rs750818212         | C  | T  | 8   | 2   | 6   | European         | 0.5         | 0.5         |
| MYH6 | chr14 | 23407063 | rs727503239         | C  | T  | 5   | 2   | 3   | European         | 1           | 0           |
| MYH6 | chr14 | 23407109 | rs142850511         | C  | T  | 6   | 3   | 3   | European         | 1           | 0           |
| MYH6 | chr14 | 23407124 | rs765792077         | G  | A  | 2   | 0   | 2   | European         | 1           | 0           |
| MYH6 | chr14 | 23407138 | rs150574114         | C  | T  | 220 | 60  | 160 | African American | 0.490909091 | 0.662975207 |
| MYH6 | chr14 | 23407147 | rs559973480         | G  | C  | 2   | 1   | 1   | European         | 0.5         | 0.5         |
| MYH6 | chr14 | 23407153 | rs1320990570        | A  | G  | 2   | 1   | 1   | European         | 1           | 0           |
| MYH6 | chr14 | 23407154 | rs573489857         | G  | T  | 31  | 0   | 31  | South Asian      | 1           | 0           |
| MYH6 | chr14 | 23407156 | rs771786844         | C  | T  | 2   | 0   | 2   | European         | 0.5         | 0.5         |
| MYH6 | chr14 | 23407157 | rs587782959         | G  | A  | 4   | 1   | 3   | Latin American 2 | 1           | 0           |
| MYH6 | chr14 | 23407189 | rs562487638         | G  | A  | 3   | 1   | 2   | Latin American 1 | 0.333333333 | 0.666666667 |
| MYH6 | chr14 | 23407217 | rs371667049         | C  | T  | 5   | 3   | 2   | African American | 0.6         | 0.56        |
| MYH6 | chr14 | 23382424 | rs774470143         | C  | T  | 2   | 0   | 2   | African American | 0.5         | 0.5         |
| MYH6 | chr14 | 23382568 | rs183733802         | G  | A  | 4   | 2   | 2   | Latin American 1 | 0.75        | 0.375       |
| MYH6 | chr14 | 23382569 | chr14_23382569_T_C  | T  | C  | 2   | 0   | 2   | African American | 0.5         | 0.5         |
| MYH6 | chr14 | 23383225 | rs759126258         | C  | T  | 8   | 6   | 2   | European         | 0.5         | 0.6875      |
| MYH6 | chr14 | 23383327 | rs200509899         | G  | A  | 8   | 3   | 5   | European         | 0.75        | 0.375       |
| MYH6 | chr14 | 23383328 | rs529785746         | T  | G  | 128 | 42  | 86  | European         | 0.5546875   | 0.613769531 |
| MYH6 | chr14 | 23383328 | rs762454355         | T  | TG | 2   | 1   | 1   | European         | 1           | 0           |
| MYH6 | chr14 | 23383331 | chr14_23383331_GA_G | GA | G  | 4   | 2   | 2   | AFR              | 0.25        | 0.75        |
| MYH6 | chr14 | 23383332 | rs546563498         | A  | G  | 524 | 172 | 352 | European         | 0.454198473 | 0.737799371 |
| MYH6 | chr14 | 23383335 | chr14_23383335_GT_G | GT | G  | 3   | 2   | 1   | European         | 0.333333333 | 0.666666667 |
| MYH6 | chr14 | 23383336 | rs566376459         | T  | G  | 686 | 220 | 466 | European         | 0.467930029 | 0.726725259 |
| MYH6 | chr14 | 23384715 | rs753745013         | G  | A  | 4   | 0   | 4   | Latin American 1 | 0.5         | 0.625       |
| MYH6 | chr14 | 23384728 | rs764779081         | G  | C  | 3   | 0   | 3   | South Asian      | 0.666666667 | 0.444444444 |
| MYH6 | chr14 | 23386140 | rs557113705         | C  | T  | 70  | 0   | 70  | South Asian      | 0.971428571 | 0.055510204 |

|      |       |          |                    |    |    |     |     |     |                  |             |             |
|------|-------|----------|--------------------|----|----|-----|-----|-----|------------------|-------------|-------------|
| MYH6 | chr14 | 23386626 | rs572175190        | G  | T  | 7   | 4   | 3   | European         | 0.857142857 | 0.244897959 |
| MYH6 | chr14 | 23386627 | rs766134513        | G  | T  | 4   | 3   | 1   | European         | 1           | 0           |
| MYH6 | chr14 | 23386628 | chr14_23386628_G_T | G  | T  | 18  | 7   | 11  | African American | 0.277777778 | 0.790123457 |
| MYH6 | chr14 | 23386630 | chr14_23386630_A_T | A  | T  | 723 | 316 | 407 | European         | 0.406639004 | 0.737273042 |
| MYH6 | chr14 | 23386630 | chr14_23386630_A_G | A  | G  | 11  | 3   | 8   | European         | 0.363636364 | 0.710743802 |
| MYH6 | chr14 | 23386635 | rs193922653        | T  | G  | 221 | 59  | 162 | African American | 0.457013575 | 0.701377941 |
| MYH6 | chr14 | 23386636 | rs767751723        | G  | A  | 2   | 0   | 2   | East Asian       | 1           | 0           |
| MYH6 | chr14 | 23386637 | rs902807471        | G  | T  | 5   | 2   | 3   | Latin American 1 | 1           | 0           |
| MYH6 | chr14 | 23386640 | chr14_23386640_C_G | C  | G  | 6   | 2   | 4   | AFR              | 0.333333333 | 0.777777778 |
| MYH6 | chr14 | 23387523 | rs754290268        | C  | T  | 2   | 0   | 2   | Latin American 1 | 0.5         | 0.5         |
| MYH6 | chr14 | 23387662 | rs201785356        | C  | G  | 6   | 4   | 2   | African American | 0.833333333 | 0.277777778 |
| MYH6 | chr14 | 23387755 | rs750348638        | C  | T  | 3   | 0   | 3   | Latin American 2 | 1           | 0           |
| MYH6 | chr14 | 23387930 | rs58949384         | G  | A  | 538 | 176 | 362 | African American | 0.537174721 | 0.602119926 |
| MYH6 | chr14 | 23387930 | chr14_23387930_G_C | G  | C  | 21  | 6   | 15  | African American | 0.523809524 | 0.571428571 |
| MYH6 | chr14 | 23387933 | rs1205116523       | G  | A  | 2   | 0   | 2   | European         | 1           | 0           |
| MYH6 | chr14 | 23387940 | rs776671287        | C  | T  | 4   | 0   | 4   | South Asian      | 1           | 0           |
| MYH6 | chr14 | 23388147 | rs188675676        | T  | G  | 54  | 27  | 27  | East Asian       | 1           | 0           |
| MYH6 | chr14 | 23388150 | rs193283041        | T  | C  | 55  | 27  | 28  | East Asian       | 0.981818182 | 0.035702479 |
| MYH6 | chr14 | 23388348 | rs200280718        | T  | G  | 2   | 1   | 1   | European         | 0.5         | 0.5         |
| MYH6 | chr14 | 23389053 | rs904695058        | C  | T  | 3   | 1   | 2   | European         | 0.666666667 | 0.444444444 |
| MYH6 | chr14 | 23389057 | rs770492637        | T  | TG | 40  | 10  | 30  | African American | 0.8         | 0.34        |
| MYH6 | chr14 | 23389057 | rs1158854454       | T  | G  | 41  | 16  | 25  | European         | 0.463414634 | 0.694824509 |
| MYH6 | chr14 | 23389065 | rs28730768         | G  | T  | 35  | 8   | 27  | European         | 0.342857143 | 0.733061224 |
| MYH6 | chr14 | 23389065 | chr14_23389065_G_C | G  | C  | 10  | 3   | 7   | Latin American 1 | 0.3         | 0.78        |
| MYH6 | chr14 | 23389065 | chr14_23389065_G_A | G  | A  | 3   | 2   | 1   | European         | 1           | 0           |
| MYH6 | chr14 | 23389066 | chr14_23389066_G_A | G  | A  | 15  | 3   | 12  | European         | 0.4         | 0.728888889 |
| MYH6 | chr14 | 23389066 | chr14_23389066_G_T | G  | T  | 11  | 2   | 9   | European         | 0.272727273 | 0.809917355 |
| MYH6 | chr14 | 23389067 | rs754263361        | G  | T  | 12  | 5   | 7   | European         | 0.25        | 0.777777778 |
| MYH6 | chr14 | 23389068 | rs563648655        | G  | T  | 10  | 5   | 5   | European         | 0.7         | 0.46        |
| MYH6 | chr14 | 23389069 | rs372226248        | G  | T  | 28  | 4   | 24  | European         | 0.571428571 | 0.619897959 |
| MYH6 | chr14 | 23389069 | chr14_23389069_G_C | G  | C  | 7   | 2   | 5   | European         | 0.571428571 | 0.571428571 |
| MYH6 | chr14 | 23389069 | chr14_23389069_G_A | G  | A  | 3   | 3   | 0   | European         | 0.666666667 | 0.444444444 |
| MYH6 | chr14 | 23389070 | rs529249069        | G  | T  | 92  | 34  | 58  | African American | 0.413043478 | 0.642958412 |
| MYH6 | chr14 | 23389385 | rs367866050        | G  | A  | 52  | 20  | 32  | Latin American 1 | 0.557692308 | 0.524408284 |
| MYH6 | chr14 | 23389519 | rs772882288        | T  | C  | 3   | 0   | 3   | European         | 1           | 0           |
| MYH6 | chr14 | 23389526 | rs200883903        | A  | C  | 3   | 0   | 3   | East Asian       | 0.666666667 | 0.444444444 |
| MYH6 | chr14 | 23390444 | rs1228533339       | T  | C  | 2   | 0   | 2   | African American | 1           | 0           |
| MYH6 | chr14 | 23390448 | rs1027186100       | TG | T  | 30  | 8   | 22  | European         | 0.733333333 | 0.448888889 |
| MYH6 | chr14 | 23390449 | rs565446762        | G  | T  | 14  | 3   | 11  | Latin American 1 | 0.928571429 | 0.132653061 |
| MYH6 | chr14 | 23392656 | rs1351412081       | C  | G  | 14  | 4   | 10  | South Asian      | 0.428571429 | 0.724489796 |
| MYH6 | chr14 | 23392656 | chr14_23392656_C_A | C  | A  | 6   | 2   | 4   | European         | 0.5         | 0.5         |
| MYH6 | chr14 | 23392657 | rs1412097411       | A  | G  | 17  | 4   | 13  | European         | 0.294117647 | 0.761245675 |
| MYH6 | chr14 | 23392660 | rs1335659241       | A  | G  | 10  | 1   | 9   | European         | 0.7         | 0.42        |
| MYH6 | chr14 | 23392660 | chr14_23392660_A_T | A  | T  | 655 | 243 | 412 | European         | 0.364885496 | 0.770286114 |
| MYH6 | chr14 | 23392662 | chr14_23392662_A_C | A  | C  | 38  | 13  | 25  | European         | 0.342105263 | 0.789473684 |
| MYH6 | chr14 | 23392662 | chr14_23392662_A_G | A  | G  | 6   | 2   | 4   | European         | 0.833333333 | 0.277777778 |

|       |       |          |                         |      |        |     |    |     |                  |             |             |
|-------|-------|----------|-------------------------|------|--------|-----|----|-----|------------------|-------------|-------------|
| MYH6  | chr14 | 23392663 | rs777447828             | A    | G      | 303 | 88 | 215 | European         | 0.478547855 | 0.718273808 |
| MYH6  | chr14 | 23392663 | rs746645093             | A    | AG     | 4   | 1  | 3   | European         | 0.5         | 0.625       |
| MYH6  | chr14 | 23392667 | chr14_23392667_T_TGGGGG | T    | TGGGGG | 10  | 5  | 5   | European         | 0.4         | 0.74        |
| MYH6  | chr14 | 23392906 | rs1402534657            | T    | G      | 2   | 0  | 2   | European         | 1           | 0           |
| MYH6  | chr14 | 23393334 | rs940951780             | C    | T      | 3   | 2  | 1   | Latin American 1 | 0.666666667 | 0.444444444 |
| MYH6  | chr14 | 23393521 | rs376752266             | G    | A      | 4   | 2  | 2   | African American | 0.75        | 0.375       |
| MYH6  | chr14 | 23393523 | rs770004037             | C    | T      | 2   | 2  | 0   | European         | 1           | 0           |
| MYH6  | chr14 | 23393661 | rs28730772              | C    | T      | 137 | 47 | 90  | European         | 0.912408759 | 0.164846289 |
| MYH6  | chr14 | 23393666 | rs757078942             | C    | T      | 2   | 1  | 1   | European         | 1           | 0           |
| MYH6  | chr14 | 23394068 | rs752345245             | C    | T      | 10  | 1  | 9   | South Asian      | 0.9         | 0.18        |
| MYH6  | chr14 | 23394327 | rs376527296             | G    | T      | 6   | 2  | 4   | African American | 0.833333333 | 0.277777778 |
| MYH6  | chr14 | 23394331 | rs201624129             | G    | C      | 9   | 1  | 8   | African American | 0.888888889 | 0.197530864 |
| MYH6  | chr14 | 23394337 | rs190342289             | G    | A      | 61  | 20 | 41  | African American | 0.508196721 | 0.645525396 |
| MYH6  | chr14 | 23396428 | chr14_23396428_C_A      | C    | A      | 3   | 2  | 1   | Latin American 1 | 1           | 0           |
| MYH6  | chr14 | 23396432 | rs115453571             | G    | C      | 73  | 22 | 51  | African American | 0.534246575 | 0.560705573 |
| MYH6  | chr14 | 23396693 | rs771569935             | C    | T      | 3   | 2  | 1   | African American | 0.666666667 | 0.444444444 |
| MYH6  | chr14 | 23396823 | rs773311446             | G    | A      | 2   | 1  | 1   | European         | 1           | 0           |
| MYH6  | chr14 | 23397536 | chr14_23397536_T_C      | T    | C      | 3   | 1  | 2   | East Asian       | 1           | 0           |
| MYH6  | chr14 | 23397545 | rs369938365             | G    | T      | 5   | 2  | 3   | European         | 0.8         | 0.32        |
| MYH6  | chr14 | 23397627 | rs573517144             | G    | A      | 4   | 0  | 4   | South Asian      | 1           | 0           |
| MYH6  | chr14 | 23399044 | rs374941865             | G    | A      | 3   | 0  | 3   | European         | 1           | 0           |
| MYH6  | chr14 | 23399049 | rs574931386             | G    | A      | 5   | 1  | 4   | European         | 0.8         | 0.32        |
| MYH6  | chr14 | 23400253 | rs1333051527            | C    | T      | 2   | 1  | 1   | European         | 1           | 0           |
| MYH6  | chr14 | 23400709 | rs139886074             | G    | A      | 16  | 3  | 13  | Latin American 1 | 0.375       | 0.6953125   |
| MYH6  | chr14 | 23402456 | rs377327277             | C    | A      | 34  | 13 | 21  | Latin American 1 | 0.529411765 | 0.569204152 |
| MYH6  | chr14 | 23402815 | rs886050412             | G    | A      | 2   | 0  | 2   | European         | 0.5         | 0.5         |
| MYH6  | chr14 | 23403342 | rs370158816             | G    | A      | 3   | 2  | 1   | African American | 1           | 0           |
| MYH6  | chr14 | 23403451 | rs727505228             | G    | A      | 2   | 1  | 1   | East Asian       | 0.5         | 0.5         |
| MYH6  | chr14 | 23403453 | rs538318997             | T    | G      | 4   | 0  | 4   | South Asian      | 1           | 0           |
| MYH6  | chr14 | 23403461 | rs1003284412            | G    | C      | 2   | 1  | 1   | Latin American 2 | 1           | 0           |
| MYH6  | chr14 | 23404393 | rs199859986             | G    | A      | 35  | 12 | 23  | European         | 0.828571429 | 0.305306122 |
| MYH6  | chr14 | 23404828 | rs755395894             | G    | A      | 8   | 5  | 3   | European         | 0.875       | 0.21875     |
| MYH6  | chr14 | 23405135 | chr14_23405135_A_G      | A    | G      | 2   | 0  | 2   | European         | 1           | 0           |
| MYH6  | chr14 | 23405381 | rs141187241             | T    | C      | 7   | 1  | 6   | African American | 0.571428571 | 0.489795918 |
| MYH6  | chr14 | 23405394 | rs773519707             | A    | G      | 2   | 0  | 2   | Latin American 2 | 1           | 0           |
| MYH6  | chr14 | 23405781 | rs374248120             | C    | T      | 5   | 1  | 4   | European         | 0.4         | 0.72        |
| MYH6  | chr14 | 23405782 | rs566157802             | G    | A      | 7   | 3  | 4   | African American | 0.428571429 | 0.693877551 |
| MYH6  | chr14 | 23407610 | rs991798370             | T    | C      | 3   | 1  | 2   | African American | 0.666666667 | 0.444444444 |
| MYH6  | chr14 | 23407616 | rs187963893             | G    | A      | 2   | 0  | 2   | African American | 0.5         | 0.5         |
| PSEN1 | chr14 | 73148066 | rs199759305             | T    | G      | 2   | 1  | 1   | European         | 1           | 0           |
| PSEN1 | chr14 | 73148087 | rs568497767             | G    | A      | 2   | 0  | 2   | South Asian      | 1           | 0           |
| PSEN1 | chr14 | 73148099 | rs149562759             | G    | A      | 2   | 0  | 2   | European         | 1           | 0           |
| PSEN1 | chr14 | 73170804 | rs200824179             | A    | G      | 4   | 0  | 4   | South Asian      | 1           | 0           |
| PSEN1 | chr14 | 73170812 | rs746691776             | C    | T      | 4   | 0  | 4   | Latin American 2 | 0.75        | 0.375       |
| PSEN1 | chr14 | 73170813 | rs63750592              | G    | A      | 20  | 8  | 12  | European         | 0.9         | 0.185       |
| PSEN1 | chr14 | 73170824 | rs759538127             | AACG | A      | 8   | 2  | 6   | European         | 0.75        | 0.40625     |

|       |       |          |                    |   |      |     |    |     |                  |             |             |
|-------|-------|----------|--------------------|---|------|-----|----|-----|------------------|-------------|-------------|
| PSEN1 | chr14 | 73170830 | chr14_73170830_A_G | A | G    | 2   | 0  | 2   | Latin American 2 | 0.5         | 0.5         |
| PSEN1 | chr14 | 73170831 | rs769125155        | G | GGCC | 2   | 1  | 1   | European         | 1           | 0           |
| PSEN1 | chr14 | 73170833 | rs140189461        | C | G    | 2   | 0  | 2   | European         | 1           | 0           |
| PSEN1 | chr14 | 73170834 | rs367775281        | G | T    | 2   | 1  | 1   | European         | 1           | 0           |
| PSEN1 | chr14 | 73170854 | rs200373970        | C | G    | 14  | 4  | 10  | African American | 0.5         | 0.642857143 |
| PSEN1 | chr14 | 73170870 | rs201216284        | G | A    | 3   | 0  | 3   | Latin American 2 | 1           | 0           |
| PSEN1 | chr14 | 73170945 | rs63749824         | C | T    | 9   | 9  | 0   | European         | 0.888888889 | 0.197530864 |
| PSEN1 | chr14 | 73170998 | rs63750852         | G | A    | 2   | 0  | 2   | East Asian       | 0.5         | 0.5         |
| PSEN1 | chr14 | 73173571 | rs63750450         | A | G    | 2   | 2  | 0   | European         | 1           | 0           |
| PSEN1 | chr14 | 73173642 | rs63751037         | A | G    | 2   | 2  | 0   | European         | 1           | 0           |
| PSEN1 | chr14 | 73173669 | rs747363386        | A | G    | 4   | 3  | 1   | Latin American 1 | 0.75        | 0.375       |
| PSEN1 | chr14 | 73186860 | rs63750590         | A | G    | 5   | 5  | 0   | European         | 1           | 0           |
| PSEN1 | chr14 | 73192661 | rs556147068        | A | G    | 3   | 0  | 3   | Latin American 1 | 1           | 0           |
| PSEN1 | chr14 | 73192663 | rs781431904        | A | G    | 2   | 0  | 2   | South Asian      | 1           | 0           |
| PSEN1 | chr14 | 73192687 | rs201375628        | G | C    | 3   | 3  | 0   | European         | 1           | 0           |
| PSEN1 | chr14 | 73192712 | rs63750082         | G | C    | 47  | 44 | 3   | Latin American 1 | 1           | 0           |
| PSEN1 | chr14 | 73192748 | rs140064975        | C | T    | 2   | 1  | 1   | European         | 1           | 0           |
| PSEN1 | chr14 | 73192754 | rs763831389        | G | A    | 4   | 3  | 1   | African American | 0.5         | 0.5         |
| PSEN1 | chr14 | 73192774 | chr14_73192774_A_C | A | C    | 238 | 76 | 162 | European         | 0.420168067 | 0.735329426 |
| PSEN1 | chr14 | 73192786 | rs63749836         | G | A    | 2   | 2  | 0   | European         | 1           | 0           |
| PSEN1 | chr14 | 73192828 | rs63750888         | A | C    | 2   | 2  | 0   | East Asian       | 1           | 0           |
| PSEN1 | chr14 | 73198052 | rs63750301         | C | T    | 2   | 2  | 0   | European         | 1           | 0           |
| PSEN1 | chr14 | 73198067 | rs63750900         | G | A    | 5   | 5  | 0   | European         | 0.6         | 0.48        |
| PSEN1 | chr14 | 73206388 | chr14_73206388_A_G | A | G    | 5   | 1  | 4   | Latin American 1 | 0.6         | 0.56        |
| PSEN1 | chr14 | 73206449 | rs115865530        | A | G    | 8   | 2  | 6   | European         | 0.5         | 0.65625     |
| PSEN1 | chr14 | 73211811 | rs121917809        | A | G    | 13  | 7  | 6   | African American | 0.538461538 | 0.627218935 |
| PSEN1 | chr14 | 73211816 | rs138871096        | G | A    | 3   | 0  | 3   | European         | 0.666666667 | 0.444444444 |
| PSEN1 | chr14 | 73211847 | rs1018763711       | A | G    | 3   | 1  | 2   | European         | 1           | 0           |
| PSEN1 | chr14 | 73211876 | rs376433615        | C | T    | 4   | 2  | 2   | African American | 0.5         | 0.5         |
| PSEN1 | chr14 | 73211886 | rs63751174         | G | A    | 6   | 1  | 5   | European         | 0.333333333 | 0.722222222 |
| PSEN1 | chr14 | 73211886 | chr14_73211886_G_C | G | C    | 4   | 2  | 2   | European         | 1           | 0           |
| PSEN1 | chr14 | 73211891 | rs199715992        | G | A    | 3   | 1  | 2   | European         | 1           | 0           |
| PSEN1 | chr14 | 73217165 | chr14_73217165_G_A | G | A    | 2   | 2  | 0   | Latin American 1 | 1           | 0           |
| PSEN1 | chr14 | 73217225 | rs661              | G | A    | 2   | 2  | 0   | European         | 1           | 0           |
| PSEN1 | chr14 | 73219161 | rs63751223         | G | C    | 3   | 3  | 0   | European         | 1           | 0           |
| PSEN1 | chr14 | 73219177 | rs63750083         | C | A    | 7   | 7  | 0   | Latin American 2 | 1           | 0           |
| PSEN1 | chr14 | 73219225 | chr14_73219225_T_C | T | C    | 3   | 2  | 1   | East Asian       | 1           | 0           |
| VASH1 | chr14 | 76762861 | rs374959372        | G | T    | 2   | 1  | 1   | European         | 1           | 0           |
| VASH1 | chr14 | 76762874 | rs756027617        | C | T    | 2   | 0  | 2   | East Asian       | 1           | 0           |
| VASH1 | chr14 | 76762886 | rs779164121        | C | T    | 3   | 0  | 3   | South Asian      | 1           | 0           |
| VASH1 | chr14 | 76762892 | rs369529500        | C | A    | 29  | 10 | 19  | European         | 0.793103448 | 0.354340071 |
| VASH1 | chr14 | 76762906 | rs1228941258       | A | G    | 2   | 0  | 2   | African American | 0.5         | 0.5         |
| VASH1 | chr14 | 76762931 | rs1392398140       | C | G    | 8   | 2  | 6   | Latin American 1 | 0.875       | 0.21875     |
| VASH1 | chr14 | 76763010 | rs748367098        | C | G    | 3   | 0  | 3   | Latin American 2 | 0.666666667 | 0.444444444 |
| VASH1 | chr14 | 76763014 | rs577900620        | G | C    | 3   | 0  | 3   | South Asian      | 1           | 0           |
| VASH1 | chr14 | 76763071 | rs747044282        | A | T    | 4   | 3  | 1   | European         | 0.75        | 0.375       |

|        |       |          |                    |      |   |     |    |     |                  |             |             |
|--------|-------|----------|--------------------|------|---|-----|----|-----|------------------|-------------|-------------|
| VASH1  | chr14 | 76763095 | rs868471716        | G    | A | 3   | 2  | 1   | East Asian       | 0.666666667 | 0.444444444 |
| VASH1  | chr14 | 76763096 | rs369339672        | C    | T | 2   | 0  | 2   | European         | 0.5         | 0.5         |
| VASH1  | chr14 | 76763110 | rs1013420374       | G    | A | 4   | 1  | 3   | European         | 1           | 0           |
| VASH1  | chr14 | 76763114 | rs1414110266       | C    | T | 2   | 0  | 2   | East Asian       | 0.5         | 0.5         |
| VASH1  | chr14 | 76769969 | chr14_76769969_A_C | A    | C | 10  | 2  | 8   | European         | 0.5         | 0.68        |
| VASH1  | chr14 | 76769985 | rs150278014        | C    | T | 13  | 1  | 12  | South Asian      | 0.461538462 | 0.674556213 |
| VASH1  | chr14 | 76769994 | rs780666389        | C    | T | 2   | 0  | 2   | AFR              | 1           | 0           |
| VASH1  | chr14 | 76770003 | chr14_76770003_C_G | C    | G | 2   | 1  | 1   | Latin American 1 | 1           | 0           |
| VASH1  | chr14 | 76770014 | rs145801473        | C    | T | 3   | 0  | 3   | European         | 0.666666667 | 0.444444444 |
| VASH1  | chr14 | 76771225 | rs938226811        | A    | G | 25  | 23 | 2   | Latin American 1 | 1           | 0           |
| VASH1  | chr14 | 76773171 | rs770991695        | G    | T | 3   | 1  | 2   | East Asian       | 1           | 0           |
| VASH1  | chr14 | 76775923 | rs1020147157       | C    | T | 11  | 5  | 6   | Latin American 1 | 1           | 0           |
| VASH1  | chr14 | 76775992 | rs200045558        | T    | C | 2   | 2  | 0   | European         | 1           | 0           |
| VASH1  | chr14 | 76776001 | rs958707889        | C    | T | 2   | 0  | 2   | African American | 0.5         | 0.5         |
| VASH1  | chr14 | 76776118 | chr14_76776118_G_A | G    | A | 2   | 0  | 2   | European         | 1           | 0           |
| VASH1  | chr14 | 76776177 | chr14_76776177_G_C | G    | C | 5   | 0  | 5   | South Asian      | 1           | 0           |
| VASH1  | chr14 | 76776211 | rs773750240        | C    | G | 2   | 1  | 1   | East Asian       | 0.5         | 0.5         |
| VASH1  | chr14 | 76776223 | rs983058154        | G    | A | 9   | 2  | 7   | Latin American 1 | 1           | 0           |
| VASH1  | chr14 | 76777960 | rs199512010        | T    | C | 19  | 6  | 13  | European         | 0.684210526 | 0.498614958 |
| VASH1  | chr14 | 76778008 | rs746325381        | A    | G | 3   | 0  | 3   | Latin American 1 | 0.666666667 | 0.444444444 |
| VASH1  | chr14 | 76778020 | rs756563704        | C    | T | 3   | 0  | 3   | Latin American 1 | 0.666666667 | 0.444444444 |
| VASH1  | chr14 | 76778032 | rs554460179        | A    | G | 2   | 0  | 2   | European         | 0.5         | 0.5         |
| VASH1  | chr14 | 76778951 | rs549007706        | C    | T | 3   | 0  | 3   | South Asian      | 1           | 0           |
| VASH1  | chr14 | 76778958 | rs780375125        | CAAG | C | 6   | 1  | 5   | South Asian      | 0.666666667 | 0.444444444 |
| VASH1  | chr14 | 76778963 | rs1028528816       | A    | C | 11  | 2  | 9   | Latin American 1 | 0.909090909 | 0.165289256 |
| VASH1  | chr14 | 76778993 | rs1048082716       | T    | G | 2   | 0  | 2   | African American | 1           | 0           |
| VASH1  | chr14 | 76779010 | rs766846068        | C    | T | 2   | 0  | 2   | African American | 0.5         | 0.5         |
| SPTLC2 | chr14 | 77512309 | rs138652708        | G    | A | 175 | 58 | 117 | European         | 0.742857143 | 0.426383673 |
| SPTLC2 | chr14 | 77512345 | rs763898397        | C    | T | 3   | 0  | 3   | European         | 1           | 0           |
| SPTLC2 | chr14 | 77512351 | rs375384785        | C    | T | 3   | 1  | 2   | African American | 1           | 0           |
| SPTLC2 | chr14 | 77518154 | rs1317731653       | C    | G | 2   | 1  | 1   | African American | 1           | 0           |
| SPTLC2 | chr14 | 77521531 | rs747168398        | G    | A | 2   | 1  | 1   | African American | 0.5         | 0.5         |
| SPTLC2 | chr14 | 77521572 | rs116342919        | C    | T | 23  | 22 | 1   | Latin American 1 | 1           | 0           |
| SPTLC2 | chr14 | 77552152 | rs577862696        | A    | G | 5   | 0  | 5   | South Asian      | 1           | 0           |
| SPTLC2 | chr14 | 77552203 | rs143757018        | C    | T | 27  | 24 | 3   | Latin American 1 | 0.851851852 | 0.260631001 |
| SPTLC2 | chr14 | 77555304 | rs114940503        | T    | C | 21  | 7  | 14  | African American | 0.571428571 | 0.557823129 |
| SPTLC2 | chr14 | 77555406 | rs375669404        | C    | T | 5   | 1  | 4   | European         | 0.4         | 0.64        |
| SPTLC2 | chr14 | 77555499 | rs116822112        | C    | T | 3   | 3  | 0   | European         | 0.666666667 | 0.444444444 |
| SPTLC2 | chr14 | 77557086 | rs761038205        | C    | T | 2   | 1  | 1   | European         | 0.5         | 0.5         |
| SPTLC2 | chr14 | 77562420 | chr14_77562420_T_G | T    | G | 5   | 1  | 4   | Native American  | 0.6         | 0.56        |
| SPTLC2 | chr14 | 77562485 | rs572378641        | C    | G | 13  | 0  | 13  | South Asian      | 1           | 0           |
| SPTLC2 | chr14 | 77570473 | chr14_77570473_C_T | C    | T | 2   | 0  | 2   | East Asian       | 0.5         | 0.5         |
| SPTLC2 | chr14 | 77576892 | rs75565823         | C    | G | 216 | 64 | 152 | African American | 0.50462963  | 0.633659122 |
| SPTLC2 | chr14 | 77576896 | rs762005720        | T    | C | 2   | 0  | 2   | European         | 1           | 0           |
| SPTLC2 | chr14 | 77576899 | rs767761435        | T    | C | 2   | 1  | 1   | European         | 0.5         | 0.5         |
| SPTLC2 | chr14 | 77578977 | rs1205341271       | G    | T | 2   | 1  | 1   | European         | 1           | 0           |

|        |       |          |                    |            |         |     |    |     |                  |             |             |
|--------|-------|----------|--------------------|------------|---------|-----|----|-----|------------------|-------------|-------------|
| SPTLC2 | chr14 | 77579002 | rs749262868        | C          | A       | 3   | 2  | 1   | East Asian       | 1           | 0           |
| SPTLC2 | chr14 | 77579022 | rs150036058        | A          | G       | 3   | 2  | 1   | European         | 1           | 0           |
| SPTLC2 | chr14 | 77579030 | rs760762454        | C          | T       | 4   | 0  | 4   | South Asian      | 1           | 0           |
| SPTLC2 | chr14 | 77597194 | chr14_77597194_C_T | C          | T       | 3   | 0  | 3   | East Asian       | 1           | 0           |
| SPTLC2 | chr14 | 77597275 | rs776997699        | C          | T       | 2   | 0  | 2   | European         | 0.5         | 0.5         |
| SPTLC2 | chr14 | 77597359 | rs746133060        | C          | T       | 2   | 1  | 1   | European         | 1           | 0           |
| SPTLC2 | chr14 | 77616452 | rs759802248        | CCGGCGGCGG | C       | 2   | 0  | 2   | East Asian       | 0.5         | 0.5         |
| SPTLC2 | chr14 | 77616457 | rs577436926        | GGCGGCT    | G       | 70  | 16 | 54  | African American | 0.614285714 | 0.556326531 |
| SPTLC2 | chr14 | 77616457 | rs767978553        | G          | GGCGGCT | 4   | 1  | 3   | European         | 0.5         | 0.625       |
| SPTLC2 | chr14 | 77616481 | rs763621248        | G          | T       | 4   | 2  | 2   | African American | 1           | 0           |
| SPTLC2 | chr14 | 77616507 | rs1017782894       | C          | G       | 2   | 1  | 1   | East Asian       | 1           | 0           |
| SPTLC2 | chr14 | 77616543 | rs756336007        | T          | TGCG    | 4   | 3  | 1   | East Asian       | 1           | 0           |
| POLR2M | chr15 | 57706855 | chr15_57706855_C_T | C          | T       | 2   | 1  | 1   | Latin American 1 | 1           | 0           |
| POLR2M | chr15 | 57706859 | rs369875700        | G          | A       | 9   | 3  | 6   | European         | 0.777777778 | 0.37037037  |
| POLR2M | chr15 | 57706882 | rs1441196656       | G          | A       | 2   | 0  | 2   | African American | 0.5         | 0.5         |
| POLR2M | chr15 | 57706884 | rs150413697        | G          | C       | 100 | 35 | 65  | African American | 0.35        | 0.7192      |
| POLR2M | chr15 | 57706907 | rs1303169211       | T          | C       | 2   | 1  | 1   | Latin American 2 | 1           | 0           |
| POLR2M | chr15 | 57706929 | rs143786017        | G          | T       | 19  | 8  | 11  | European         | 0.789473684 | 0.332409972 |
| POLR2M | chr15 | 57706948 | rs759292733        | C          | T       | 5   | 2  | 3   | African American | 1           | 0           |
| POLR2M | chr15 | 57708775 | rs376259791        | A          | C       | 9   | 2  | 7   | European         | 1           | 0           |
| POLR2M | chr15 | 57708779 | rs747766853        | C          | T       | 5   | 0  | 5   | Latin American 2 | 1           | 0           |
| POLR2M | chr15 | 57708830 | rs564578717        | C          | T       | 5   | 0  | 5   | South Asian      | 1           | 0           |
| POLR2M | chr15 | 57708836 | rs757506257        | G          | C       | 2   | 0  | 2   | East Asian       | 1           | 0           |
| POLR2M | chr15 | 57708844 | rs142111452        | T          | C       | 6   | 2  | 4   | African American | 0.5         | 0.666666667 |
| POLR2M | chr15 | 57708900 | rs146680768        | G          | T       | 25  | 8  | 17  | Latin American 1 | 0.68        | 0.4896      |
| POLR2M | chr15 | 57708976 | rs748933077        | A          | C       | 115 | 11 | 104 | European         | 0.982608696 | 0.034328922 |
| POLR2M | chr15 | 57708988 | rs770362164        | C          | G       | 3   | 0  | 3   | African American | 0.666666667 | 0.444444444 |
| POLR2M | chr15 | 57709006 | rs772087924        | A          | G       | 4   | 1  | 3   | African American | 1           | 0           |
| POLR2M | chr15 | 57709052 | rs1168700972       | A          | G       | 2   | 2  | 0   | Latin American 2 | 1           | 0           |
| POLR2M | chr15 | 57709058 | rs150624904        | G          | T       | 90  | 30 | 60  | European         | 0.711111111 | 0.442716049 |
| POLR2M | chr15 | 57709090 | rs148967635        | C          | T       | 33  | 11 | 22  | African American | 0.484848485 | 0.629935721 |
| POLR2M | chr15 | 57709103 | rs776514950        | C          | G       | 4   | 2  | 2   | European         | 0.5         | 0.625       |
| POLR2M | chr15 | 57709109 | rs1278352059       | A          | G       | 3   | 0  | 3   | Latin American 1 | 1           | 0           |
| POLR2M | chr15 | 57709127 | rs147063275        | G          | A       | 11  | 3  | 8   | European         | 0.818181818 | 0.297520661 |
| POLR2M | chr15 | 57709142 | rs186295545        | C          | T       | 23  | 9  | 14  | Latin American 1 | 0.782608696 | 0.355387524 |
| POLR2M | chr15 | 57709201 | rs372856991        | A          | G       | 5   | 3  | 2   | European         | 1           | 0           |
| POLR2M | chr15 | 57709205 | rs139689651        | C          | T       | 76  | 30 | 46  | European         | 0.697368421 | 0.489612188 |
| POLR2M | chr15 | 57709214 | rs746010328        | G          | A       | 2   | 0  | 2   | European         | 1           | 0           |
| POLR2M | chr15 | 57709226 | rs143723126        | C          | T       | 157 | 55 | 102 | African American | 0.605095541 | 0.558724492 |
| POLR2M | chr15 | 57709237 | rs546736463        | G          | A       | 3   | 0  | 3   | South Asian      | 1           | 0           |
| POLR2M | chr15 | 57709355 | rs181483928        | A          | G       | 9   | 3  | 6   | European         | 0.888888889 | 0.197530864 |
| POLR2M | chr15 | 57712039 | rs753164094        | A          | G       | 7   | 2  | 5   | European         | 0.428571429 | 0.612244898 |
| POLR2M | chr15 | 57712048 | rs149603270        | G          | A       | 15  | 2  | 13  | African American | 0.666666667 | 0.506666667 |
| POLR2M | chr15 | 57712054 | rs764472139        | C          | T       | 2   | 2  | 0   | East Asian       | 0.5         | 0.5         |
| POLR2M | chr15 | 57712055 | rs535153229        | G          | A       | 5   | 0  | 5   | South Asian      | 1           | 0           |
| POLR2M | chr15 | 57712057 | rs375123004        | C          | T       | 3   | 0  | 3   | Latin American 2 | 0.666666667 | 0.444444444 |

|        |       |          |                    |   |   |     |     |     |                  |             |             |
|--------|-------|----------|--------------------|---|---|-----|-----|-----|------------------|-------------|-------------|
| POLR2M | chr15 | 57712060 | rs61742647         | C | T | 163 | 50  | 113 | African American | 0.576687117 | 0.57277278  |
| POLR2M | chr15 | 57712061 | rs191581515        | G | T | 2   | 2   | 0   | European         | 1           | 0           |
| POLR2M | chr15 | 57712075 | rs1444005000       | C | T | 41  | 8   | 33  | African American | 0.43902439  | 0.660321237 |
| POLR2M | chr15 | 57712099 | rs202121342        | C | T | 9   | 1   | 8   | East Asian       | 0.666666667 | 0.49382716  |
| POLR2M | chr15 | 57712118 | rs746293165        | A | G | 2   | 1   | 1   | European         | 1           | 0           |
| POLR2M | chr15 | 57712127 | rs372198478        | C | T | 4   | 1   | 3   | European         | 1           | 0           |
| POLR2M | chr15 | 57712142 | rs145935845        | T | C | 4   | 2   | 2   | European         | 1           | 0           |
| POLR2M | chr15 | 57714554 | rs201582621        | G | A | 2   | 1   | 1   | European         | 1           | 0           |
| POLR2M | chr15 | 57714558 | rs142219594        | C | T | 5   | 1   | 4   | African American | 0.6         | 0.56        |
| POLR2M | chr15 | 57714560 | rs199795787        | C | G | 5   | 3   | 2   | European         | 1           | 0           |
| POLR2M | chr15 | 57714633 | rs377736232        | G | A | 3   | 2   | 1   | European         | 0.666666667 | 0.444444444 |
| POLR2M | chr15 | 57714650 | rs200346640        | G | A | 5   | 1   | 4   | European         | 1           | 0           |
| POLR2M | chr15 | 57714656 | rs113738650        | G | A | 359 | 121 | 238 | East Asian       | 0.598885794 | 0.604433547 |
| POLR2M | chr15 | 57714668 | rs1252530115       | G | A | 2   | 1   | 1   | European         | 0.5         | 0.5         |
| POLR2M | chr15 | 57735474 | chr15_57735474_C_T | C | T | 3   | 2   | 1   | European         | 1           | 0           |
| POLR2M | chr15 | 57735494 | rs535618156        | C | T | 2   | 0   | 2   | European         | 0.5         | 0.5         |
| POLR2M | chr15 | 57735495 | rs753101703        | G | A | 7   | 1   | 6   | African American | 0.428571429 | 0.693877551 |
| POLR2M | chr15 | 57735505 | rs1236689882       | G | A | 6   | 0   | 6   | Latin American 1 | 0.666666667 | 0.5         |
| POLR2M | chr15 | 57735536 | rs778236032        | G | A | 6   | 4   | 2   | Latin American 1 | 0.5         | 0.611111111 |
| POLR2M | chr15 | 57735557 | rs1310198797       | G | A | 4   | 0   | 4   | African American | 0.75        | 0.375       |
| AKAP13 | chr15 | 85521464 | rs1289947220       | G | C | 2   | 0   | 2   | Latin American 1 | 1           | 0           |
| AKAP13 | chr15 | 85521482 | rs757388189        | G | A | 5   | 0   | 5   | Latin American 2 | 0.8         | 0.32        |
| AKAP13 | chr15 | 85521491 | rs139333419        | T | C | 4   | 2   | 2   | European         | 0.5         | 0.5         |
| AKAP13 | chr15 | 85521492 | chr15_85521492_A_G | A | G | 5   | 2   | 3   | Native American  | 0.6         | 0.48        |
| AKAP13 | chr15 | 85521504 | rs747976758        | T | C | 3   | 0   | 3   | South Asian      | 1           | 0           |
| AKAP13 | chr15 | 85521518 | rs770686231        | C | T | 4   | 0   | 4   | South Asian      | 1           | 0           |
| AKAP13 | chr15 | 85521519 | rs142964345        | G | A | 17  | 7   | 10  | African American | 0.705882353 | 0.442906574 |
| AKAP13 | chr15 | 85521536 | rs765635230        | C | T | 3   | 1   | 2   | European         | 0.666666667 | 0.444444444 |
| AKAP13 | chr15 | 85521545 | rs1398671766       | A | G | 2   | 1   | 1   | European         | 1           | 0           |
| AKAP13 | chr15 | 85521567 | rs371620269        | T | C | 2   | 1   | 1   | East Asian       | 0.5         | 0.5         |
| AKAP13 | chr15 | 85533614 | rs762293575        | A | T | 6   | 3   | 3   | East Asian       | 0.833333333 | 0.277777778 |
| AKAP13 | chr15 | 85533623 | rs371046040        | C | G | 12  | 2   | 10  | African American | 0.333333333 | 0.666666667 |
| AKAP13 | chr15 | 85533655 | rs116551873        | G | T | 8   | 2   | 6   | East Asian       | 0.75        | 0.375       |
| AKAP13 | chr15 | 85533676 | rs114690403        | G | A | 16  | 3   | 13  | Latin American 2 | 0.375       | 0.765625    |
| AKAP13 | chr15 | 85533680 | rs140192469        | A | G | 3   | 1   | 2   | European         | 1           | 0           |
| AKAP13 | chr15 | 85533683 | rs1404268182       | A | G | 3   | 1   | 2   | Latin American 2 | 1           | 0           |
| AKAP13 | chr15 | 85533691 | rs959866936        | T | C | 3   | 2   | 1   | African American | 0.333333333 | 0.666666667 |
| AKAP13 | chr15 | 85533692 | rs779331144        | A | G | 4   | 1   | 3   | South Asian      | 0.75        | 0.375       |
| AKAP13 | chr15 | 85533715 | rs751917747        | A | G | 2   | 0   | 2   | Latin American 1 | 0.5         | 0.5         |
| AKAP13 | chr15 | 85533720 | rs759795627        | T | A | 2   | 0   | 2   | Latin American 2 | 1           | 0           |
| AKAP13 | chr15 | 85533733 | rs767591228        | C | G | 3   | 1   | 2   | East Asian       | 1           | 0           |
| AKAP13 | chr15 | 85533751 | rs753501133        | C | T | 2   | 0   | 2   | African American | 0.5         | 0.5         |
| AKAP13 | chr15 | 85533752 | rs990608403        | G | A | 2   | 0   | 2   | Latin American 1 | 0.5         | 0.5         |
| AKAP13 | chr15 | 85533807 | rs151064385        | G | T | 4   | 2   | 2   | European         | 1           | 0           |
| AKAP13 | chr15 | 85533842 | rs373706610        | C | T | 6   | 0   | 6   | Latin American 1 | 0.5         | 0.611111111 |
| AKAP13 | chr15 | 85533866 | rs115160225        | A | G | 145 | 48  | 97  | African American | 0.537931034 | 0.602425684 |

|        |       |          |                    |   |   |     |    |     |                  |             |             |
|--------|-------|----------|--------------------|---|---|-----|----|-----|------------------|-------------|-------------|
| AKAP13 | chr15 | 85543783 | rs576412136        | C | G | 16  | 9  | 7   | Latin American 1 | 0.875       | 0.21875     |
| AKAP13 | chr15 | 85543845 | rs775361535        | G | T | 8   | 0  | 8   | South Asian      | 1           | 0           |
| AKAP13 | chr15 | 85543856 | rs774109201        | G | T | 2   | 0  | 2   | South Asian      | 1           | 0           |
| AKAP13 | chr15 | 85543861 | rs114777682        | C | T | 87  | 28 | 59  | East Asian       | 0.91954023  | 0.151935526 |
| AKAP13 | chr15 | 85543862 | rs767963974        | G | A | 2   | 1  | 1   | East Asian       | 0.5         | 0.5         |
| AKAP13 | chr15 | 85543868 | rs114660587        | C | T | 45  | 12 | 33  | African American | 0.555555556 | 0.571851852 |
| AKAP13 | chr15 | 85543881 | rs200112313        | C | G | 9   | 5  | 4   | European         | 1           | 0           |
| AKAP13 | chr15 | 85543885 | rs143476050        | C | A | 3   | 2  | 1   | European         | 1           | 0           |
| AKAP13 | chr15 | 85543912 | rs747893582        | G | A | 2   | 0  | 2   | European         | 1           | 0           |
| AKAP13 | chr15 | 85543936 | rs146115074        | C | G | 31  | 13 | 18  | European         | 0.806451613 | 0.330905307 |
| AKAP13 | chr15 | 85575141 | rs116039213        | G | C | 13  | 6  | 7   | East Asian       | 1           | 0           |
| AKAP13 | chr15 | 85575181 | rs368469513        | C | T | 3   | 0  | 3   | Latin American 1 | 0.666666667 | 0.444444444 |
| AKAP13 | chr15 | 85575184 | rs114219897        | A | C | 19  | 1  | 18  | European         | 0.789473684 | 0.360110803 |
| AKAP13 | chr15 | 85575214 | rs201565811        | A | T | 53  | 6  | 47  | Latin American 2 | 0.622641509 | 0.46991812  |
| AKAP13 | chr15 | 85575285 | rs202065769        | A | G | 7   | 2  | 5   | European         | 1           | 0           |
| AKAP13 | chr15 | 85575286 | rs139228938        | C | G | 7   | 3  | 4   | European         | 0.714285714 | 0.448979592 |
| AKAP13 | chr15 | 85575294 | rs115410282        | A | G | 33  | 13 | 20  | East Asian       | 0.939393939 | 0.115702479 |
| AKAP13 | chr15 | 85575328 | rs149986294        | T | C | 2   | 1  | 1   | African American | 1           | 0           |
| AKAP13 | chr15 | 85578967 | rs753072762        | T | C | 3   | 2  | 1   | European         | 1           | 0           |
| AKAP13 | chr15 | 85579033 | rs140842808        | C | T | 3   | 0  | 3   | European         | 0.666666667 | 0.444444444 |
| AKAP13 | chr15 | 85579054 | rs115657055        | G | A | 8   | 4  | 4   | East Asian       | 1           | 0           |
| AKAP13 | chr15 | 85579060 | rs116090433        | C | T | 73  | 16 | 57  | African American | 0.575342466 | 0.54832051  |
| AKAP13 | chr15 | 85579068 | rs73452430         | G | A | 310 | 81 | 229 | African American | 0.558064516 | 0.601186264 |
| AKAP13 | chr15 | 85579083 | rs79064356         | A | T | 59  | 25 | 34  | East Asian       | 0.966101695 | 0.066072968 |
| AKAP13 | chr15 | 85579099 | rs116715824        | G | A | 6   | 2  | 4   | European         | 1           | 0           |
| AKAP13 | chr15 | 85579157 | rs762478169        | G | C | 3   | 2  | 1   | European         | 0.666666667 | 0.444444444 |
| AKAP13 | chr15 | 85579167 | rs140056616        | C | G | 14  | 0  | 14  | South Asian      | 0.928571429 | 0.132653061 |
| AKAP13 | chr15 | 85579167 | chr15_85579167_C_T | C | T | 4   | 1  | 3   | Latin American 1 | 0.75        | 0.375       |
| AKAP13 | chr15 | 85579168 | rs367656156        | G | A | 4   | 2  | 2   | European         | 0.5         | 0.625       |
| AKAP13 | chr15 | 85579192 | rs757003460        | G | A | 6   | 3  | 3   | Latin American 1 | 0.666666667 | 0.444444444 |
| AKAP13 | chr15 | 85579194 | rs115123806        | G | A | 186 | 69 | 117 | African American | 0.456989247 | 0.604347323 |
| AKAP13 | chr15 | 85579207 | rs115984398        | G | C | 11  | 7  | 4   | East Asian       | 0.818181818 | 0.314049587 |
| AKAP13 | chr15 | 85579252 | rs534098467        | C | G | 30  | 0  | 30  | South Asian      | 0.966666667 | 0.064444444 |
| AKAP13 | chr15 | 85579297 | rs747772241        | A | G | 2   | 1  | 1   | European         | 1           | 0           |
| AKAP13 | chr15 | 85579303 | rs574002505        | C | T | 2   | 1  | 1   | European         | 0.5         | 0.5         |
| AKAP13 | chr15 | 85579321 | rs116178459        | G | C | 2   | 1  | 1   | European         | 1           | 0           |
| AKAP13 | chr15 | 85579366 | rs753793034        | C | G | 2   | 0  | 2   | Latin American 2 | 1           | 0           |
| AKAP13 | chr15 | 85579373 | rs201441822        | C | A | 25  | 3  | 22  | Latin American 2 | 0.72        | 0.4032      |
| AKAP13 | chr15 | 85579389 | rs771276525        | A | G | 3   | 0  | 3   | Native American  | 0.666666667 | 0.444444444 |
| AKAP13 | chr15 | 85579417 | rs760053210        | T | C | 3   | 1  | 2   | European         | 0.666666667 | 0.444444444 |
| AKAP13 | chr15 | 85579422 | rs1389898186       | A | G | 5   | 2  | 3   | African American | 0.8         | 0.32        |
| AKAP13 | chr15 | 85579450 | chr15_85579450_C_T | C | T | 2   | 1  | 1   | African American | 1           | 0           |
| AKAP13 | chr15 | 85579489 | rs149404999        | G | C | 5   | 1  | 4   | European         | 1           | 0           |
| AKAP13 | chr15 | 85579524 | chr15_85579524_C_G | C | G | 2   | 0  | 2   | Latin American 2 | 0.5         | 0.5         |
| AKAP13 | chr15 | 85579529 | rs111631396        | G | A | 56  | 13 | 43  | African American | 0.553571429 | 0.607780612 |
| AKAP13 | chr15 | 85579534 | rs114358244        | C | T | 128 | 39 | 89  | European         | 0.5390625   | 0.62512207  |

|        |       |          |                    |   |   |     |    |     |                  |             |             |
|--------|-------|----------|--------------------|---|---|-----|----|-----|------------------|-------------|-------------|
| AKAP13 | chr15 | 85579576 | rs370099086        | G | A | 2   | 0  | 2   | European         | 0.5         | 0.5         |
| AKAP13 | chr15 | 85579581 | rs1420215822       | A | G | 2   | 0  | 2   | South Asian      | 1           | 0           |
| AKAP13 | chr15 | 85579618 | rs749767494        | G | A | 2   | 1  | 1   | European         | 0.5         | 0.5         |
| AKAP13 | chr15 | 85579629 | rs140751689        | G | C | 3   | 0  | 3   | African American | 0.666666667 | 0.444444444 |
| AKAP13 | chr15 | 85579648 | rs114851088        | C | G | 3   | 2  | 1   | European         | 0.666666667 | 0.444444444 |
| AKAP13 | chr15 | 85579666 | chr15_85579666_T_A | T | A | 2   | 0  | 2   | South Asian      | 1           | 0           |
| AKAP13 | chr15 | 85579678 | rs115385197        | C | T | 19  | 4  | 15  | African American | 0.526315789 | 0.542936288 |
| AKAP13 | chr15 | 85579729 | rs145602546        | C | G | 38  | 11 | 27  | African American | 0.526315789 | 0.522160665 |
| AKAP13 | chr15 | 85579735 | rs186091653        | G | A | 54  | 12 | 42  | Latin American 1 | 0.888888889 | 0.205075446 |
| AKAP13 | chr15 | 85579744 | rs774109791        | A | G | 5   | 1  | 4   | Latin American 1 | 0.4         | 0.64        |
| AKAP13 | chr15 | 85579747 | rs142726559        | C | T | 12  | 3  | 9   | African American | 0.75        | 0.416666667 |
| AKAP13 | chr15 | 85579812 | rs140849986        | G | C | 4   | 3  | 1   | Latin American 1 | 0.5         | 0.625       |
| AKAP13 | chr15 | 85579818 | rs115087152        | C | A | 22  | 9  | 13  | East Asian       | 0.909090909 | 0.165289256 |
| AKAP13 | chr15 | 85579836 | rs760113840        | C | A | 2   | 1  | 1   | African American | 1           | 0           |
| AKAP13 | chr15 | 85579837 | rs753437582        | C | T | 2   | 0  | 2   | South Asian      | 1           | 0           |
| AKAP13 | chr15 | 85579846 | rs113831353        | C | G | 125 | 37 | 88  | African American | 0.672       | 0.498688    |
| AKAP13 | chr15 | 85579876 | rs114785802        | C | G | 4   | 1  | 3   | East Asian       | 1           | 0           |
| AKAP13 | chr15 | 85579911 | rs61731842         | A | G | 4   | 0  | 4   | African American | 0.5         | 0.5         |
| AKAP13 | chr15 | 85579915 | rs773228617        | C | T | 5   | 0  | 5   | Latin American 2 | 0.6         | 0.48        |
| AKAP13 | chr15 | 85579923 | rs775726341        | G | C | 2   | 1  | 1   | European         | 1           | 0           |
| AKAP13 | chr15 | 85579933 | chr15_85579933_T_C | T | C | 2   | 1  | 1   | European         | 1           | 0           |
| AKAP13 | chr15 | 85579977 | rs766947167        | A | G | 7   | 2  | 5   | European         | 0.857142857 | 0.244897959 |
| AKAP13 | chr15 | 85580019 | rs151229540        | C | T | 17  | 6  | 11  | European         | 0.823529412 | 0.30449827  |
| AKAP13 | chr15 | 85580031 | rs371267734        | A | G | 2   | 2  | 0   | African American | 1           | 0           |
| AKAP13 | chr15 | 85580034 | rs1028534305       | A | G | 3   | 1  | 2   | Native American  | 1           | 0           |
| AKAP13 | chr15 | 85580037 | rs752381792        | G | A | 3   | 1  | 2   | European         | 1           | 0           |
| AKAP13 | chr15 | 85580070 | rs1180255641       | C | A | 3   | 0  | 3   | African American | 0.333333333 | 0.666666667 |
| AKAP13 | chr15 | 85580085 | rs754071781        | A | C | 4   | 2  | 2   | European         | 0.75        | 0.375       |
| AKAP13 | chr15 | 85580134 | rs140010500        | A | T | 3   | 1  | 2   | European         | 1           | 0           |
| AKAP13 | chr15 | 85580137 | rs779615006        | C | A | 2   | 1  | 1   | European         | 1           | 0           |
| AKAP13 | chr15 | 85580167 | rs754072379        | C | T | 2   | 0  | 2   | European         | 1           | 0           |
| AKAP13 | chr15 | 85580179 | rs1297496292       | C | T | 3   | 1  | 2   | East Asian       | 0.666666667 | 0.444444444 |
| AKAP13 | chr15 | 85580181 | rs367724744        | G | A | 4   | 2  | 2   | African American | 0.75        | 0.375       |
| AKAP13 | chr15 | 85580205 | rs182951551        | C | A | 61  | 7  | 54  | Latin American 2 | 0.590163934 | 0.48374093  |
| AKAP13 | chr15 | 85580226 | rs115899691        | G | T | 221 | 70 | 151 | African American | 0.610859729 | 0.551708605 |
| AKAP13 | chr15 | 85580229 | rs1171870839       | C | T | 2   | 0  | 2   | European         | 0.5         | 0.5         |
| AKAP13 | chr15 | 85580232 | rs761236898        | G | A | 2   | 1  | 1   | European         | 0.5         | 0.5         |
| AKAP13 | chr15 | 85580254 | rs112484391        | C | T | 3   | 0  | 3   | European         | 0.333333333 | 0.666666667 |
| AKAP13 | chr15 | 85580258 | rs146531116        | T | A | 14  | 6  | 8   | African American | 0.428571429 | 0.642857143 |
| AKAP13 | chr15 | 85580265 | rs775639445        | C | G | 6   | 3  | 3   | East Asian       | 1           | 0           |
| AKAP13 | chr15 | 85580284 | rs1011555174       | A | G | 2   | 0  | 2   | European         | 1           | 0           |
| AKAP13 | chr15 | 85580338 | rs143201252        | A | G | 46  | 14 | 32  | European         | 0.891304348 | 0.201323251 |
| AKAP13 | chr15 | 85580355 | rs773065285        | C | T | 5   | 0  | 5   | African American | 0.8         | 0.32        |
| AKAP13 | chr15 | 85580364 | rs766366935        | G | A | 2   | 0  | 2   | South Asian      | 1           | 0           |
| AKAP13 | chr15 | 85580409 | rs769926385        | T | G | 3   | 0  | 3   | Latin American 2 | 0.666666667 | 0.444444444 |
| AKAP13 | chr15 | 85580423 | rs192631225        | C | G | 3   | 1  | 2   | East Asian       | 1           | 0           |

|        |       |          |                    |             |   |     |     |     |                  |             |             |
|--------|-------|----------|--------------------|-------------|---|-----|-----|-----|------------------|-------------|-------------|
| AKAP13 | chr15 | 85580485 | rs541378791        | C           | T | 2   | 0   | 2   | Latin American 2 | 1           | 0           |
| AKAP13 | chr15 | 85580497 | rs201020686        | A           | G | 4   | 1   | 3   | European         | 1           | 0           |
| AKAP13 | chr15 | 85580499 | chr15_85580499_A_G | A           | G | 2   | 1   | 1   | Latin American 1 | 1           | 0           |
| AKAP13 | chr15 | 85580505 | rs780499518        | A           | G | 2   | 0   | 2   | South Asian      | 1           | 0           |
| AKAP13 | chr15 | 85580527 | rs201694916        | C           | T | 6   | 2   | 4   | European         | 1           | 0           |
| AKAP13 | chr15 | 85580539 | rs114705815        | A           | T | 224 | 76  | 148 | European         | 0.919642857 | 0.152463329 |
| AKAP13 | chr15 | 85580569 | rs756421637        | A           | G | 3   | 0   | 3   | European         | 0.666666667 | 0.444444444 |
| AKAP13 | chr15 | 85580570 | rs780591386        | G           | T | 2   | 0   | 2   | European         | 0.5         | 0.5         |
| AKAP13 | chr15 | 85580578 | rs114703106        | C           | T | 393 | 125 | 268 | European         | 0.720101781 | 0.456241219 |
| AKAP13 | chr15 | 85580578 | chr15_85580578_C_A | C           | A | 2   | 1   | 1   | European         | 1           | 0           |
| AKAP13 | chr15 | 85580581 | rs147029167        | G           | A | 4   | 1   | 3   | Latin American 2 | 0.75        | 0.375       |
| AKAP13 | chr15 | 85580602 | chr15_85580602_T_G | T           | G | 205 | 66  | 139 | European         | 0.756097561 | 0.407995241 |
| AKAP13 | chr15 | 85580628 | rs144288070        | G           | A | 12  | 8   | 4   | Latin American 1 | 0.666666667 | 0.486111111 |
| AKAP13 | chr15 | 85580635 | chr15_85580635_T_C | T           | C | 2   | 1   | 1   | European         | 1           | 0           |
| AKAP13 | chr15 | 85580643 | rs201309736        | G           | A | 12  | 6   | 6   | European         | 0.5         | 0.569444444 |
| AKAP13 | chr15 | 85580659 | rs758805052        | G           | A | 3   | 1   | 2   | European         | 0.666666667 | 0.444444444 |
| AKAP13 | chr15 | 85580701 | rs114075066        | C           | T | 14  | 5   | 9   | East Asian       | 1           | 0           |
| AKAP13 | chr15 | 85580703 | rs760310221        | G           | A | 11  | 4   | 7   | East Asian       | 1           | 0           |
| AKAP13 | chr15 | 85580724 | rs116479144        | A           | G | 33  | 15  | 18  | African American | 0.727272727 | 0.411386593 |
| AKAP13 | chr15 | 85580736 | rs753221850        | A           | G | 6   | 2   | 4   | East Asian       | 1           | 0           |
| AKAP13 | chr15 | 85580830 | rs79828763         | C           | G | 301 | 82  | 219 | African American | 0.481727575 | 0.637321884 |
| AKAP13 | chr15 | 85580860 | rs199817872        | C           | T | 14  | 2   | 12  | Latin American 2 | 0.642857143 | 0.5         |
| AKAP13 | chr15 | 85580872 | rs139043547        | C           | T | 12  | 4   | 8   | African American | 0.583333333 | 0.486111111 |
| AKAP13 | chr15 | 85580898 | rs149904784        | T           | C | 54  | 16  | 38  | Latin American 1 | 0.518518519 | 0.574074074 |
| AKAP13 | chr15 | 85580899 | rs144970859        | C           | T | 10  | 1   | 9   | African American | 0.6         | 0.54        |
| AKAP13 | chr15 | 85580908 | rs778759962        | T           | C | 3   | 2   | 1   | European         | 1           | 0           |
| AKAP13 | chr15 | 85580919 | rs560778376        | C           | G | 65  | 2   | 63  | South Asian      | 0.984615385 | 0.030295858 |
| AKAP13 | chr15 | 85580982 | rs997036828        | T           | C | 2   | 0   | 2   | European         | 1           | 0           |
| AKAP13 | chr15 | 85580997 | rs777734057        | G           | A | 2   | 2   | 0   | European         | 1           | 0           |
| AKAP13 | chr15 | 85581019 | rs141822123        | C           | T | 9   | 5   | 4   | African American | 0.555555556 | 0.567901235 |
| AKAP13 | chr15 | 85581048 | rs112778096        | G           | A | 5   | 3   | 2   | European         | 0.8         | 0.32        |
| AKAP13 | chr15 | 85581072 | rs111499130        | G           | A | 56  | 13  | 43  | African American | 0.553571429 | 0.607780612 |
| AKAP13 | chr15 | 85581098 | rs1343012406       | A           | T | 2   | 1   | 1   | European         | 1           | 0           |
| AKAP13 | chr15 | 85581108 | rs138265569        | G           | T | 11  | 4   | 7   | African American | 0.818181818 | 0.297520661 |
| AKAP13 | chr15 | 85581117 | rs373307726        | C           | G | 12  | 8   | 4   | European         | 0.916666667 | 0.152777778 |
| AKAP13 | chr15 | 85581190 | rs764122141        | CTCTGTTGCCA | C | 15  | 7   | 8   | European         | 0.6         | 0.524444444 |
| AKAP13 | chr15 | 85581246 | rs372655714        | A           | C | 4   | 3   | 1   | European         | 0.75        | 0.375       |
| AKAP13 | chr15 | 85581268 | rs114185694        | T           | G | 10  | 6   | 4   | European         | 1           | 0           |
| AKAP13 | chr15 | 85581303 | chr15_85581303_A_G | A           | G | 2   | 0   | 2   | European         | 1           | 0           |
| AKAP13 | chr15 | 85581331 | rs776089298        | C           | T | 7   | 2   | 5   | Latin American 1 | 0.428571429 | 0.653061224 |
| AKAP13 | chr15 | 85581368 | rs141804908        | G           | A | 9   | 5   | 4   | African American | 0.888888889 | 0.197530864 |
| AKAP13 | chr15 | 85581396 | rs142529641        | C           | T | 2   | 1   | 1   | European         | 1           | 0           |
| AKAP13 | chr15 | 85581426 | rs757567881        | G           | A | 3   | 0   | 3   | Latin American 2 | 0.333333333 | 0.666666667 |
| AKAP13 | chr15 | 85581453 | rs779149455        | G           | A | 4   | 1   | 3   | European         | 0.75        | 0.375       |
| AKAP13 | chr15 | 85581480 | rs140372827        | G           | T | 54  | 24  | 30  | European         | 0.907407407 | 0.172153635 |
| AKAP13 | chr15 | 85581483 | rs375690520        | A           | G | 4   | 0   | 4   | European         | 0.75        | 0.375       |

|        |       |          |                    |   |   |    |    |    |                  |             |             |
|--------|-------|----------|--------------------|---|---|----|----|----|------------------|-------------|-------------|
| AKAP13 | chr15 | 85581504 | rs767856592        | G | A | 2  | 0  | 2  | European         | 1           | 0           |
| AKAP13 | chr15 | 85581556 | rs373400964        | A | C | 2  | 2  | 0  | European         | 1           | 0           |
| AKAP13 | chr15 | 85581562 | rs1389100006       | C | T | 2  | 0  | 2  | European         | 1           | 0           |
| AKAP13 | chr15 | 85581588 | rs147919379        | G | A | 3  | 2  | 1  | Latin American 1 | 0.666666667 | 0.444444444 |
| AKAP13 | chr15 | 85581589 | rs374286995        | C | G | 2  | 1  | 1  | European         | 0.5         | 0.5         |
| AKAP13 | chr15 | 85581610 | rs367642917        | A | G | 6  | 2  | 4  | European         | 1           | 0           |
| AKAP13 | chr15 | 85581635 | rs760988060        | G | T | 8  | 2  | 6  | East Asian       | 1           | 0           |
| AKAP13 | chr15 | 85581686 | rs145429082        | T | A | 39 | 14 | 25 | European         | 0.58974359  | 0.585141354 |
| AKAP13 | chr15 | 85581693 | rs751773181        | C | G | 2  | 2  | 0  | East Asian       | 1           | 0           |
| AKAP13 | chr15 | 85581694 | rs143251715        | C | T | 54 | 13 | 41 | African American | 0.537037037 | 0.619341564 |
| AKAP13 | chr15 | 85581754 | rs767596014        | C | G | 2  | 0  | 2  | African American | 0.5         | 0.5         |
| AKAP13 | chr15 | 85581757 | rs368657000        | T | C | 4  | 1  | 3  | European         | 1           | 0           |
| AKAP13 | chr15 | 85581783 | rs776205323        | G | A | 4  | 0  | 4  | European         | 1           | 0           |
| AKAP13 | chr15 | 85581810 | rs114556336        | A | G | 22 | 16 | 6  | East Asian       | 1           | 0           |
| AKAP13 | chr15 | 85581828 | rs759396524        | C | T | 2  | 0  | 2  | European         | 0.5         | 0.5         |
| AKAP13 | chr15 | 85581838 | rs758332238        | A | T | 2  | 0  | 2  | South Asian      | 1           | 0           |
| AKAP13 | chr15 | 85581849 | rs114446918        | G | A | 8  | 2  | 6  | Latin American 1 | 0.875       | 0.21875     |
| AKAP13 | chr15 | 85581867 | rs150794633        | G | C | 9  | 3  | 6  | African American | 0.555555556 | 0.567901235 |
| AKAP13 | chr15 | 85581895 | rs115527863        | G | A | 11 | 6  | 5  | European         | 0.818181818 | 0.314049587 |
| AKAP13 | chr15 | 85581897 | rs374061085        | C | T | 5  | 3  | 2  | African American | 0.8         | 0.32        |
| AKAP13 | chr15 | 85581949 | rs201900357        | G | A | 6  | 2  | 4  | European         | 1           | 0           |
| AKAP13 | chr15 | 85582005 | rs200410789        | A | G | 7  | 2  | 5  | African American | 0.857142857 | 0.244897959 |
| AKAP13 | chr15 | 85582030 | rs779156339        | G | A | 2  | 1  | 1  | European         | 1           | 0           |
| AKAP13 | chr15 | 85582057 | rs781461759        | A | G | 4  | 1  | 3  | Latin American 1 | 0.75        | 0.375       |
| AKAP13 | chr15 | 85582088 | rs147390824        | G | C | 5  | 2  | 3  | European         | 1           | 0           |
| AKAP13 | chr15 | 85582090 | rs1346595217       | G | A | 2  | 2  | 0  | European         | 1           | 0           |
| AKAP13 | chr15 | 85585812 | rs781171704        | A | G | 2  | 1  | 1  | European         | 0.5         | 0.5         |
| AKAP13 | chr15 | 85639389 | rs1330063743       | T | A | 4  | 1  | 3  | European         | 1           | 0           |
| AKAP13 | chr15 | 85639417 | rs763244043        | C | G | 8  | 3  | 5  | East Asian       | 1           | 0           |
| AKAP13 | chr15 | 85639431 | rs114836739        | G | A | 21 | 10 | 11 | European         | 0.714285714 | 0.430839002 |
| AKAP13 | chr15 | 85645820 | rs1419085063       | T | C | 2  | 1  | 1  | European         | 1           | 0           |
| AKAP13 | chr15 | 85645821 | chr15_85645821_G_T | G | T | 2  | 0  | 2  | African American | 0.5         | 0.5         |
| AKAP13 | chr15 | 85645827 | rs756916714        | A | G | 2  | 1  | 1  | European         | 1           | 0           |
| AKAP13 | chr15 | 85645835 | rs146588510        | G | C | 7  | 4  | 3  | European         | 1           | 0           |
| AKAP13 | chr15 | 85645844 | rs1426979648       | C | G | 2  | 0  | 2  | Latin American 2 | 1           | 0           |
| AKAP13 | chr15 | 85645854 | rs370607317        | A | G | 7  | 4  | 3  | European         | 1           | 0           |
| AKAP13 | chr15 | 85645856 | rs1049408789       | T | C | 8  | 3  | 5  | European         | 0.5         | 0.59375     |
| AKAP13 | chr15 | 85645859 | rs749179692        | A | G | 3  | 0  | 3  | European         | 1           | 0           |
| AKAP13 | chr15 | 85645877 | rs752569103        | C | G | 3  | 0  | 3  | European         | 0.666666667 | 0.444444444 |
| AKAP13 | chr15 | 85645907 | rs756516243        | C | G | 3  | 1  | 2  | Native American  | 0.666666667 | 0.444444444 |
| AKAP13 | chr15 | 85655447 | rs766006591        | A | T | 2  | 0  | 2  | South Asian      | 1           | 0           |
| AKAP13 | chr15 | 85655450 | rs755335557        | G | A | 8  | 1  | 7  | South Asian      | 0.5         | 0.6875      |
| AKAP13 | chr15 | 85655468 | rs373550260        | G | T | 2  | 0  | 2  | European         | 1           | 0           |
| AKAP13 | chr15 | 85655475 | rs200130889        | C | T | 3  | 1  | 2  | East Asian       | 0.666666667 | 0.444444444 |
| AKAP13 | chr15 | 85655561 | rs1055825684       | A | T | 6  | 2  | 4  | Latin American 1 | 1           | 0           |
| AKAP13 | chr15 | 85655564 | rs777821307        | C | T | 2  | 1  | 1  | European         | 1           | 0           |

|        |       |          |                    |             |      |     |     |     |                  |             |             |
|--------|-------|----------|--------------------|-------------|------|-----|-----|-----|------------------|-------------|-------------|
| AKAP13 | chr15 | 85655577 | rs150167931        | A           | G    | 8   | 2   | 6   | African American | 0.625       | 0.53125     |
| AKAP13 | chr15 | 85655595 | rs534473998        | CTGAGGGTCGA | C    | 6   | 3   | 3   | European         | 0.666666667 | 0.444444444 |
| AKAP13 | chr15 | 85655604 | rs367876857        | G           | A    | 2   | 0   | 2   | European         | 1           | 0           |
| AKAP13 | chr15 | 85655621 | rs142719943        | C           | T    | 16  | 7   | 9   | European         | 1           | 0           |
| AKAP13 | chr15 | 85655636 | rs374689645        | G           | A    | 7   | 2   | 5   | European         | 0.857142857 | 0.244897959 |
| AKAP13 | chr15 | 85655640 | rs573094038        | T           | TGGA | 12  | 3   | 9   | African American | 0.666666667 | 0.486111111 |
| AKAP13 | chr15 | 85655655 | rs1476657149       | T           | C    | 2   | 0   | 2   | African American | 0.5         | 0.5         |
| AKAP13 | chr15 | 85655662 | rs147772785        | T           | G    | 95  | 24  | 71  | African American | 0.621052632 | 0.51700831  |
| AKAP13 | chr15 | 85655681 | rs761870457        | A           | G    | 3   | 1   | 2   | East Asian       | 0.666666667 | 0.444444444 |
| AKAP13 | chr15 | 85655709 | rs553130968        | G           | A    | 7   | 2   | 5   | European         | 0.428571429 | 0.612244898 |
| AKAP13 | chr15 | 85655726 | rs745426384        | C           | T    | 2   | 0   | 2   | European         | 0.5         | 0.5         |
| AKAP13 | chr15 | 85655727 | rs755621625        | G           | A    | 2   | 0   | 2   | European         | 1           | 0           |
| AKAP13 | chr15 | 85655763 | rs144319108        | G           | T    | 2   | 1   | 1   | European         | 1           | 0           |
| AKAP13 | chr15 | 85655765 | rs148772528        | G           | A    | 6   | 0   | 6   | Latin American 2 | 0.5         | 0.611111111 |
| AKAP13 | chr15 | 85655776 | rs574867194        | G           | T    | 5   | 0   | 5   | South Asian      | 1           | 0           |
| AKAP13 | chr15 | 85655787 | rs201071192        | G           | A    | 11  | 4   | 7   | European         | 1           | 0           |
| AKAP13 | chr15 | 85658541 | rs370628367        | A           | T    | 3   | 1   | 2   | European         | 1           | 0           |
| AKAP13 | chr15 | 85658545 | rs181593659        | G           | A    | 21  | 7   | 14  | Latin American 1 | 0.952380952 | 0.090702948 |
| AKAP13 | chr15 | 85658554 | rs781757055        | G           | A    | 2   | 1   | 1   | European         | 1           | 0           |
| AKAP13 | chr15 | 85658557 | rs746031213        | A           | T    | 2   | 1   | 1   | European         | 1           | 0           |
| AKAP13 | chr15 | 85658575 | rs768828039        | C           | A    | 4   | 1   | 3   | European         | 1           | 0           |
| AKAP13 | chr15 | 85658580 | chr15_85658580_C_G | C           | G    | 2   | 1   | 1   | African American | 1           | 0           |
| AKAP13 | chr15 | 85664577 | rs760185045        | G           | C    | 3   | 1   | 2   | Latin American 1 | 0.666666667 | 0.444444444 |
| AKAP13 | chr15 | 85664600 | rs777916874        | G           | A    | 4   | 1   | 3   | Latin American 2 | 1           | 0           |
| AKAP13 | chr15 | 85664613 | rs201277547        | C           | G    | 3   | 0   | 3   | European         | 1           | 0           |
| AKAP13 | chr15 | 85664626 | rs114564192        | A           | T    | 34  | 9   | 25  | African American | 0.588235294 | 0.506920415 |
| AKAP13 | chr15 | 85664643 | rs747729637        | C           | A    | 2   | 1   | 1   | European         | 1           | 0           |
| AKAP13 | chr15 | 85664645 | rs150221941        | G           | A    | 3   | 0   | 3   | European         | 0.333333333 | 0.666666667 |
| AKAP13 | chr15 | 85664646 | rs115648978        | A           | G    | 3   | 1   | 2   | East Asian       | 1           | 0           |
| AKAP13 | chr15 | 85664694 | rs114369869        | T           | C    | 316 | 103 | 213 | African American | 0.493670886 | 0.59681942  |
| AKAP13 | chr15 | 85664753 | rs778789325        | C           | G    | 3   | 0   | 3   | South Asian      | 1           | 0           |
| AKAP13 | chr15 | 85669753 | rs1303253300       | A           | G    | 3   | 3   | 0   | European         | 0.666666667 | 0.444444444 |
| AKAP13 | chr15 | 85669809 | rs138963258        | A           | G    | 10  | 4   | 6   | European         | 0.9         | 0.18        |
| AKAP13 | chr15 | 85682188 | rs142686009        | A           | G    | 59  | 21  | 38  | European         | 0.949152542 | 0.097673082 |
| AKAP13 | chr15 | 85682210 | rs137923457        | G           | C    | 13  | 5   | 8   | Latin American 1 | 0.846153846 | 0.26035503  |
| AKAP13 | chr15 | 85684773 | rs202176585        | A           | G    | 4   | 1   | 3   | European         | 1           | 0           |
| AKAP13 | chr15 | 85684824 | rs1212574334       | G           | A    | 2   | 0   | 2   | European         | 0.5         | 0.5         |
| AKAP13 | chr15 | 85693330 | rs765335529        | C           | G    | 4   | 0   | 4   | South Asian      | 1           | 0           |
| AKAP13 | chr15 | 85693389 | rs762521461        | G           | A    | 2   | 0   | 2   | European         | 1           | 0           |
| AKAP13 | chr15 | 85693398 | rs199654694        | G           | C    | 6   | 0   | 6   | Latin American 1 | 0.666666667 | 0.5         |
| AKAP13 | chr15 | 85710582 | rs112971613        | C           | T    | 58  | 19  | 39  | European         | 0.706896552 | 0.476813317 |
| AKAP13 | chr15 | 85710625 | rs146388266        | C           | T    | 3   | 0   | 3   | South Asian      | 0.666666667 | 0.444444444 |
| AKAP13 | chr15 | 85715790 | rs1394883856       | T           | A    | 2   | 0   | 2   | European         | 1           | 0           |
| AKAP13 | chr15 | 85715811 | rs760882035        | C           | T    | 5   | 3   | 2   | European         | 0.8         | 0.32        |
| AKAP13 | chr15 | 85715832 | rs1158305985       | G           | A    | 2   | 0   | 2   | European         | 1           | 0           |
| AKAP13 | chr15 | 85715841 | rs374094093        | G           | A    | 14  | 1   | 13  | South Asian      | 0.928571429 | 0.132653061 |

|        |       |          |                    |   |   |     |     |     |                  |             |             |
|--------|-------|----------|--------------------|---|---|-----|-----|-----|------------------|-------------|-------------|
| AKAP13 | chr15 | 85715844 | rs750049575        | A | G | 2   | 1   | 1   | East Asian       | 0.5         | 0.5         |
| AKAP13 | chr15 | 85715862 | rs114180181        | A | T | 2   | 0   | 2   | European         | 1           | 0           |
| AKAP13 | chr15 | 85715863 | rs144526341        | A | G | 9   | 2   | 7   | Latin American 2 | 0.333333333 | 0.765432099 |
| AKAP13 | chr15 | 85715869 | rs1482094787       | G | A | 3   | 0   | 3   | AFR              | 0.333333333 | 0.666666667 |
| AKAP13 | chr15 | 85715893 | rs374815022        | C | G | 5   | 2   | 3   | African American | 0.6         | 0.48        |
| AKAP13 | chr15 | 85717326 | chr15_85717326_A_T | A | T | 2   | 0   | 2   | European         | 1           | 0           |
| AKAP13 | chr15 | 85718087 | rs776318099        | A | T | 3   | 0   | 3   | South Asian      | 1           | 0           |
| AKAP13 | chr15 | 85718091 | rs201590654        | G | A | 6   | 1   | 5   | European         | 0.333333333 | 0.722222222 |
| AKAP13 | chr15 | 85719105 | rs934979969        | C | T | 2   | 1   | 1   | African American | 0.5         | 0.5         |
| AKAP13 | chr15 | 85719196 | rs763218797        | G | C | 3   | 1   | 2   | Latin American 1 | 0.666666667 | 0.444444444 |
| AKAP13 | chr15 | 85719201 | rs200241302        | G | A | 21  | 8   | 13  | European         | 0.571428571 | 0.603174603 |
| AKAP13 | chr15 | 85719216 | rs768589987        | A | G | 4   | 1   | 3   | European         | 0.75        | 0.375       |
| AKAP13 | chr15 | 85722012 | rs774520417        | C | T | 2   | 1   | 1   | Latin American 1 | 1           | 0           |
| AKAP13 | chr15 | 85722097 | rs202084404        | G | A | 8   | 3   | 5   | European         | 0.75        | 0.40625     |
| AKAP13 | chr15 | 85722278 | rs565146846        | A | C | 70  | 1   | 69  | South Asian      | 0.971428571 | 0.055918367 |
| AKAP13 | chr15 | 85722314 | rs749067993        | G | C | 2   | 1   | 1   | African American | 0.5         | 0.5         |
| AKAP13 | chr15 | 85722329 | rs144441510        | A | C | 3   | 1   | 2   | African American | 1           | 0           |
| AKAP13 | chr15 | 85723075 | rs147829524        | A | G | 54  | 10  | 44  | Latin American 2 | 0.518518519 | 0.641289438 |
| AKAP13 | chr15 | 85723095 | rs772823353        | C | G | 19  | 9   | 10  | Latin American 1 | 0.684210526 | 0.493074792 |
| AKAP13 | chr15 | 85723111 | rs3743323          | G | A | 6   | 1   | 5   | East Asian       | 1           | 0           |
| AKAP13 | chr15 | 85723167 | rs1167709522       | A | G | 2   | 0   | 2   | South Asian      | 1           | 0           |
| AKAP13 | chr15 | 85723174 | rs531745352        | G | A | 3   | 1   | 2   | European         | 0.333333333 | 0.666666667 |
| AKAP13 | chr15 | 85723180 | rs147012053        | A | G | 3   | 0   | 3   | Latin American 2 | 0.666666667 | 0.444444444 |
| AKAP13 | chr15 | 85723260 | rs199748104        | C | T | 20  | 8   | 12  | European         | 0.95        | 0.095       |
| AKAP13 | chr15 | 85723261 | rs767950472        | G | A | 2   | 2   | 0   | East Asian       | 0.5         | 0.5         |
| AKAP13 | chr15 | 85723264 | chr15_85723264_A_G | A | G | 2   | 0   | 2   | Native American  | 1           | 0           |
| AKAP13 | chr15 | 85723276 | rs750905368        | G | A | 3   | 0   | 3   | European         | 1           | 0           |
| AKAP13 | chr15 | 85723299 | rs751582077        | A | C | 4   | 1   | 3   | European         | 1           | 0           |
| AKAP13 | chr15 | 85726482 | rs761707719        | C | T | 4   | 0   | 4   | African American | 1           | 0           |
| AKAP13 | chr15 | 85727114 | rs141217285        | G | A | 3   | 1   | 2   | African American | 1           | 0           |
| AKAP13 | chr15 | 85727121 | rs375901819        | A | G | 3   | 0   | 3   | Latin American 2 | 1           | 0           |
| AKAP13 | chr15 | 85727216 | chr15_85727216_A_T | A | T | 2   | 1   | 1   | Native American  | 1           | 0           |
| AKAP13 | chr15 | 85727228 | rs1444302131       | C | G | 3   | 0   | 3   | European         | 0.666666667 | 0.444444444 |
| AKAP13 | chr15 | 85727404 | rs756742950        | T | C | 2   | 0   | 2   | European         | 1           | 0           |
| AKAP13 | chr15 | 85730514 | rs116261620        | A | C | 241 | 66  | 175 | European         | 0.684647303 | 0.497718703 |
| AKAP13 | chr15 | 85730523 | rs78553737         | C | A | 448 | 142 | 306 | African American | 0.46875     | 0.648278061 |
| AKAP13 | chr15 | 85730525 | rs149781236        | A | G | 81  | 23  | 58  | European         | 0.802469136 | 0.341106539 |
| AKAP13 | chr15 | 85730600 | rs78778821         | C | G | 710 | 199 | 511 | African American | 0.538028169 | 0.614961317 |
| AKAP13 | chr15 | 85730611 | rs759827090        | G | T | 2   | 0   | 2   | Latin American 1 | 1           | 0           |
| AKAP13 | chr15 | 85730646 | rs1383713342       | C | G | 3   | 3   | 0   | African American | 0.666666667 | 0.444444444 |
| AKAP13 | chr15 | 85730655 | rs116407615        | C | A | 5   | 2   | 3   | African American | 0.8         | 0.32        |
| AKAP13 | chr15 | 85734996 | rs148526775        | G | C | 2   | 1   | 1   | European         | 1           | 0           |
| AKAP13 | chr15 | 85735028 | rs1041370015       | G | C | 2   | 0   | 2   | European         | 1           | 0           |
| AKAP13 | chr15 | 85735061 | rs375912393        | T | C | 2   | 1   | 1   | East Asian       | 0.5         | 0.5         |
| AKAP13 | chr15 | 85735066 | rs755786540        | C | G | 23  | 3   | 20  | Latin American 2 | 0.956521739 | 0.083175803 |
| AKAP13 | chr15 | 85735084 | rs141334273        | G | A | 14  | 5   | 9   | European         | 0.642857143 | 0.540816327 |

|        |       |          |                    |      |   |     |     |     |                  |             |             |
|--------|-------|----------|--------------------|------|---|-----|-----|-----|------------------|-------------|-------------|
| AKAP13 | chr15 | 85735088 | rs145294620        | C    | T | 18  | 6   | 12  | Latin American 1 | 0.444444444 | 0.672839506 |
| AKAP13 | chr15 | 85735097 | rs140687997        | G    | A | 7   | 2   | 5   | European         | 0.571428571 | 0.612244898 |
| AKAP13 | chr15 | 85735102 | rs373167092        | G    | A | 3   | 2   | 1   | European         | 1           | 0           |
| AKAP13 | chr15 | 85735131 | rs753498004        | T    | G | 2   | 0   | 2   | European         | 1           | 0           |
| AKAP13 | chr15 | 85735136 | chr15_85735136_T_C | T    | C | 2   | 0   | 2   | South Asian      | 1           | 0           |
| AKAP13 | chr15 | 85735605 | rs371824645        | C    | T | 5   | 2   | 3   | European         | 1           | 0           |
| AKAP13 | chr15 | 85736111 | rs377141327        | T    | C | 3   | 1   | 2   | African American | 0.666666667 | 0.444444444 |
| AKAP13 | chr15 | 85740237 | rs761515628        | G    | A | 7   | 3   | 4   | African American | 0.285714286 | 0.775510204 |
| AKAP13 | chr15 | 85740252 | rs150081112        | G    | A | 141 | 51  | 90  | European         | 0.744680851 | 0.422614557 |
| AKAP13 | chr15 | 85741046 | rs553816688        | G    | T | 14  | 0   | 14  | South Asian      | 0.928571429 | 0.132653061 |
| AKAP13 | chr15 | 85741073 | rs764113244        | A    | G | 2   | 1   | 1   | European         | 1           | 0           |
| AKAP13 | chr15 | 85741089 | rs753650719        | T    | C | 10  | 2   | 8   | Latin American 2 | 0.7         | 0.42        |
| AKAP13 | chr15 | 85741104 | rs371984959        | G    | A | 2   | 1   | 1   | African American | 0.5         | 0.5         |
| AKAP13 | chr15 | 85741109 | rs138392436        | C    | T | 10  | 4   | 6   | European         | 0.7         | 0.42        |
| AKAP13 | chr15 | 85741128 | chr15_85741128_G_A | G    | A | 2   | 1   | 1   | African American | 0.5         | 0.5         |
| AKAP13 | chr15 | 85741131 | rs774464272        | C    | T | 2   | 0   | 2   | African American | 1           | 0           |
| AKAP13 | chr15 | 85741133 | rs767773227        | A    | G | 5   | 2   | 3   | Latin American 1 | 1           | 0           |
| AKAP13 | chr15 | 85741142 | rs1239306819       | A    | G | 3   | 0   | 3   | Latin American 2 | 1           | 0           |
| AKAP13 | chr15 | 85741143 | rs201288251        | T    | C | 3   | 1   | 2   | African American | 0.666666667 | 0.444444444 |
| AKAP13 | chr15 | 85741210 | rs780368742        | G    | C | 2   | 0   | 2   | South Asian      | 1           | 0           |
| AKAP13 | chr15 | 85741241 | rs560991477        | G    | A | 8   | 0   | 8   | South Asian      | 0.875       | 0.21875     |
| AKAP13 | chr15 | 85741247 | rs529796915        | G    | C | 2   | 0   | 2   | South Asian      | 1           | 0           |
| AKAP13 | chr15 | 85741264 | rs370540321        | G    | C | 2   | 1   | 1   | African American | 0.5         | 0.5         |
| AKAP13 | chr15 | 85741271 | rs779487413        | C    | A | 2   | 1   | 1   | African American | 0.5         | 0.5         |
| AKAP13 | chr15 | 85741280 | rs1325948576       | C    | T | 2   | 1   | 1   | African American | 0.5         | 0.5         |
| AKAP13 | chr15 | 85741281 | rs115906769        | G    | A | 83  | 27  | 56  | African American | 0.518072289 | 0.64363478  |
| AKAP13 | chr15 | 85741311 | rs760383748        | A    | T | 6   | 3   | 3   | European         | 0.666666667 | 0.5         |
| AKAP13 | chr15 | 85741314 | rs755983401        | TGCA | T | 7   | 2   | 5   | European         | 1           | 0           |
| AKAP13 | chr15 | 85741330 | rs551748747        | G    | C | 2   | 2   | 0   | European         | 1           | 0           |
| AKAP13 | chr15 | 85741334 | rs148383842        | C    | G | 3   | 1   | 2   | Latin American 1 | 0.666666667 | 0.444444444 |
| AKAP13 | chr15 | 85741391 | rs771895062        | G    | C | 7   | 5   | 2   | European         | 0.857142857 | 0.244897959 |
| AKAP13 | chr15 | 85741403 | rs761342301        | G    | A | 2   | 0   | 2   | European         | 1           | 0           |
| AKAP13 | chr15 | 85741406 | rs776294448        | G    | T | 6   | 1   | 5   | Latin American 2 | 0.5         | 0.611111111 |
| AKAP13 | chr15 | 85741410 | rs141587830        | A    | G | 17  | 5   | 12  | European         | 1           | 0           |
| AKAP13 | chr15 | 85741427 | rs202160131        | G    | A | 5   | 4   | 1   | European         | 0.8         | 0.32        |
| AKAP13 | chr15 | 85741442 | rs781392994        | C    | T | 3   | 0   | 3   | European         | 1           | 0           |
| AKAP13 | chr15 | 85741443 | rs746154680        | G    | A | 2   | 1   | 1   | African American | 0.5         | 0.5         |
| AKAP13 | chr15 | 85741445 | rs756280248        | C    | T | 3   | 2   | 1   | European         | 1           | 0           |
| AKAP13 | chr15 | 85741446 | rs766942749        | G    | A | 8   | 1   | 7   | South Asian      | 0.875       | 0.21875     |
| AKAP13 | chr15 | 85741469 | rs116249792        | C    | T | 396 | 112 | 284 | African American | 0.527777778 | 0.609096011 |
| AKAP13 | chr15 | 85741470 | rs376818845        | G    | A | 10  | 7   | 3   | Latin American 1 | 0.5         | 0.66        |
| AKAP13 | chr15 | 85741475 | rs764802376        | A    | G | 3   | 0   | 3   | African American | 0.666666667 | 0.444444444 |
| AKAP13 | chr15 | 85741481 | rs143887632        | C    | T | 11  | 4   | 7   | European         | 0.636363636 | 0.545454545 |
| AKAP13 | chr15 | 85743519 | rs761212018        | A    | G | 2   | 0   | 2   | East Asian       | 1           | 0           |
| AKAP13 | chr15 | 85743521 | rs147284419        | G    | T | 7   | 2   | 5   | European         | 1           | 0           |
| AKAP13 | chr15 | 85743550 | rs139651314        | A    | G | 23  | 10  | 13  | African American | 0.695652174 | 0.47637051  |

|         |       |          |                         |      |          |     |     |     |                  |             |             |
|---------|-------|----------|-------------------------|------|----------|-----|-----|-----|------------------|-------------|-------------|
| AKAP13  | chr15 | 85743574 | rs530718840             | C    | T        | 5   | 1   | 4   | Latin American 1 | 0.4         | 0.64        |
| AKAP13  | chr15 | 85743576 | rs367775794             | A    | G        | 3   | 2   | 1   | European         | 1           | 0           |
| AKAP13  | chr15 | 85743578 | rs777055796             | A    | G        | 3   | 2   | 1   | European         | 0.666666667 | 0.444444444 |
| AKAP13  | chr15 | 85743624 | rs766348853             | A    | G        | 13  | 3   | 10  | African American | 0.846153846 | 0.26035503  |
| AKAP13  | chr15 | 85743639 | rs116329657             | C    | T        | 25  | 9   | 16  | European         | 0.76        | 0.3936      |
| AKAP13  | chr15 | 85743639 | chr15_85743639_C_G      | C    | G        | 3   | 1   | 2   | Latin American 2 | 0.666666667 | 0.444444444 |
| AKAP13  | chr15 | 85743640 | rs1219845765            | G    | A        | 3   | 2   | 1   | European         | 0.666666667 | 0.444444444 |
| AKAP13  | chr15 | 85743684 | rs771151390             | A    | G        | 2   | 0   | 2   | European         | 0.5         | 0.5         |
| AKAP13  | chr15 | 85743690 | rs112165804             | A    | C        | 2   | 2   | 0   | European         | 0.5         | 0.5         |
| AKAP13  | chr15 | 85743693 | rs113093088             | A    | G        | 5   | 3   | 2   | European         | 0.8         | 0.32        |
| AKAP13  | chr15 | 85743705 | rs140260439             | G    | A        | 10  | 3   | 7   | European         | 1           | 0           |
| AKAP13  | chr15 | 85743711 | rs114035801             | C    | G        | 12  | 1   | 11  | African American | 0.75        | 0.416666667 |
| AKAP13  | chr15 | 85743729 | rs757781196             | T    | G        | 2   | 0   | 2   | European         | 1           | 0           |
| AKAP13  | chr15 | 85743791 | rs759237602             | AAAG | A        | 20  | 6   | 14  | European         | 0.4         | 0.765       |
| AKAP13  | chr15 | 85743797 | rs35204082              | G    | C        | 134 | 37  | 97  | African American | 0.462686567 | 0.642125195 |
| AKAP13  | chr15 | 85743800 | rs35368099              | C    | A        | 126 | 37  | 89  | African American | 0.476190476 | 0.617157974 |
| AKAP13  | chr15 | 85743804 | rs79101360              | A    | C        | 116 | 12  | 104 | European         | 0.982758621 | 0.034036861 |
| AKAP13  | chr15 | 85743805 | rs367824472             | C    | T        | 5   | 1   | 4   | African American | 0.6         | 0.56        |
| AKAP13  | chr15 | 85743814 | chr15_85743814_C_G      | C    | G        | 2   | 0   | 2   | East Asian       | 1           | 0           |
| AKAP13  | chr15 | 85743822 | rs368138439             | G    | A        | 2   | 1   | 1   | European         | 1           | 0           |
| AKAP13  | chr15 | 85744634 | rs116005584             | C    | G        | 15  | 6   | 9   | European         | 0.6         | 0.56        |
| AKAP13  | chr15 | 85744634 | chr15_85744634_C_A      | C    | A        | 2   | 0   | 2   | East Asian       | 1           | 0           |
| AKAP13  | chr15 | 85744637 | rs371578263             | C    | T        | 4   | 2   | 2   | Latin American 2 | 0.5         | 0.5         |
| AKAP13  | chr15 | 85744645 | rs765677409             | G    | C        | 3   | 0   | 3   | East Asian       | 1           | 0           |
| METTL22 | chr16 | 8621778  | rs1006084143            | A    | G        | 15  | 4   | 11  | European         | 0.533333333 | 0.497777778 |
| METTL22 | chr16 | 8621782  | rs796113672             | G    | A        | 7   | 2   | 5   | Latin American 1 | 0.571428571 | 0.571428571 |
| METTL22 | chr16 | 8625481  | rs975992778             | C    | T        | 2   | 0   | 2   | African American | 0.5         | 0.5         |
| METTL22 | chr16 | 8625482  | rs140577433             | G    | A        | 27  | 8   | 19  | African American | 0.925925926 | 0.137174211 |
| METTL22 | chr16 | 8635028  | rs760794415             | G    | T        | 2   | 0   | 2   | African American | 1           | 0           |
| METTL22 | chr16 | 8639074  | rs764522598             | G    | T        | 78  | 7   | 71  | European         | 0.974358974 | 0.049967127 |
| METTL22 | chr16 | 8639075  | rs757814414             | C    | T        | 2   | 1   | 1   | European         | 1           | 0           |
| METTL22 | chr16 | 8639084  | chr16_8639084_A_T       | A    | T        | 6   | 3   | 3   | East Asian       | 1           | 0           |
| METTL22 | chr16 | 8641114  | rs181552727             | T    | C        | 9   | 3   | 6   | African American | 0.444444444 | 0.592592593 |
| METTL22 | chr16 | 8641128  | rs375890293             | C    | T        | 8   | 5   | 3   | Latin American 1 | 0.75        | 0.375       |
| METTL22 | chr16 | 8644540  | rs554667134             | G    | A        | 8   | 4   | 4   | East Asian       | 0.375       | 0.75        |
| METTL22 | chr16 | 8644728  | rs374919702             | A    | T        | 3   | 0   | 3   | African American | 0.666666667 | 0.444444444 |
| METTL22 | chr16 | 8646095  | rs777382555             | C    | G        | 2   | 1   | 1   | African American | 1           | 0           |
| METTL22 | chr16 | 8646097  | chr16_8646097_G_T       | G    | T        | 3   | 2   | 1   | African American | 0.666666667 | 0.444444444 |
| METTL22 | chr16 | 8646102  | rs369837648             | C    | T        | 3   | 3   | 0   | European         | 1           | 0           |
| SBK1    | chr16 | 28320191 | chr16_28320191_T_TCGGC  | T    | TCGGC    | 176 | 100 | 76  | European         | 0.75        | 0.416903409 |
| SBK1    | chr16 | 28320192 | chr16_28320192_GT_G     | GT   | G        | 174 | 97  | 77  | European         | 0.747126437 | 0.420729291 |
| SBK1    | chr16 | 28320202 | chr16_28320202_G_GA     | G    | GA       | 37  | 19  | 18  | European         | 0.837837838 | 0.284879474 |
| SBK1    | chr16 | 28320203 | chr16_28320203_A_AACTGC | A    | AACTGCGC | 90  | 54  | 36  | European         | 0.733333333 | 0.439753086 |
| SBK1    | chr16 | 28320207 | chr16_28320207_C_CT     | C    | CT       | 99  | 61  | 38  | European         | 0.747474747 | 0.421793695 |
| SBK1    | chr16 | 28320208 | chr16_28320208_C_CGACTT | C    | CGACTTCG | 78  | 47  | 31  | European         | 0.717948718 | 0.460223537 |
| SBK1    | chr16 | 28320209 | chr16_28320209_G_GACTT  | G    | GACTT    | 20  | 13  | 7   | European         | 0.85        | 0.27        |

|       |       |          |                         |   |           |     |    |     |                  |             |             |
|-------|-------|----------|-------------------------|---|-----------|-----|----|-----|------------------|-------------|-------------|
| SBK1  | chr16 | 28320211 | chr16_28320211_C_CTG    | C | CTG       | 71  | 44 | 27  | European         | 0.732394366 | 0.440388812 |
| SBK1  | chr16 | 28320221 | chr16_28320221_T_TGCCCC | T | TGCCCC    | 72  | 43 | 29  | European         | 0.736111111 | 0.43595679  |
| SBK1  | chr16 | 28320225 | chr16_28320225_C_CT     | C | CT        | 67  | 42 | 25  | European         | 0.731343284 | 0.441523725 |
| SBK1  | chr16 | 28320228 | chr16_28320228_C_CCCGCC | C | CCCGCGACG | 64  | 39 | 25  | European         | 0.71875     | 0.457519531 |
| SBK1  | chr16 | 28320235 | chr16_28320235_A_ACGCCG | A | ACGCCCAGC | 16  | 10 | 6   | European         | 0.8125      | 0.3203125   |
| SBK1  | chr16 | 28320235 | chr16_28320235_A_ACGCCG | A | ACGCCCAGC | 9   | 6  | 3   | European         | 0.777777778 | 0.37037037  |
| SBK1  | chr16 | 28320236 | chr16_28320236_T_TATATT | T | TATATTGCC | 9   | 6  | 3   | European         | 0.777777778 | 0.37037037  |
| SBK1  | chr16 | 28320236 | chr16_28320236_T_TGGCCT | T | TGGCCTACT | 4   | 1  | 3   | European         | 1           | 0           |
| SBK1  | chr16 | 28320237 | chr16_28320237_G_GCCCCG | G | GCCCCGA   | 16  | 10 | 6   | European         | 0.8125      | 0.3203125   |
| SBK1  | chr16 | 28320238 | chr16_28320238_A_ACC    | A | ACC       | 7   | 4  | 3   | European         | 0.714285714 | 0.448979592 |
| MMP15 | chr16 | 58026375 | rs540813875             | G | A         | 3   | 2  | 1   | East Asian       | 0.666666667 | 0.444444444 |
| MMP15 | chr16 | 58026379 | rs559140401             | G | T         | 18  | 9  | 9   | African American | 0.722222222 | 0.425925926 |
| MMP15 | chr16 | 58026379 | chr16_58026379_G_A      | G | A         | 2   | 0  | 2   | South Asian      | 1           | 0           |
| MMP15 | chr16 | 58026382 | rs1293720909            | C | G         | 2   | 1  | 1   | African American | 1           | 0           |
| MMP15 | chr16 | 58026397 | rs1002421077            | G | C         | 4   | 1  | 3   | European         | 1           | 0           |
| MMP15 | chr16 | 58026506 | rs757896283             | T | A         | 33  | 10 | 23  | Latin American 1 | 0.909090909 | 0.168962351 |
| MMP15 | chr16 | 58037481 | rs201766277             | C | T         | 3   | 0  | 3   | Latin American 2 | 0.666666667 | 0.444444444 |
| MMP15 | chr16 | 58037482 | rs376179211             | G | A         | 14  | 1  | 13  | European         | 0.214285714 | 0.826530612 |
| MMP15 | chr16 | 58037511 | rs148381965             | C | T         | 3   | 0  | 3   | European         | 0.666666667 | 0.444444444 |
| MMP15 | chr16 | 58037512 | rs368255301             | G | A         | 6   | 3  | 3   | European         | 0.833333333 | 0.277777778 |
| MMP15 | chr16 | 58037530 | rs760363930             | G | A         | 5   | 1  | 4   | European         | 0.4         | 0.72        |
| MMP15 | chr16 | 58037539 | chr16_58037539_A_G      | A | G         | 2   | 0  | 2   | South Asian      | 1           | 0           |
| MMP15 | chr16 | 58037572 | rs150458413             | G | A         | 10  | 1  | 9   | European         | 0.9         | 0.18        |
| MMP15 | chr16 | 58037580 | rs201515111             | G | A         | 2   | 1  | 1   | European         | 1           | 0           |
| MMP15 | chr16 | 58037604 | rs768960188             | G | A         | 2   | 0  | 2   | Latin American 2 | 1           | 0           |
| MMP15 | chr16 | 58037607 | rs199836131             | G | A         | 23  | 8  | 15  | European         | 1           | 0           |
| MMP15 | chr16 | 58038276 | rs773483224             | C | T         | 2   | 0  | 2   | African American | 0.5         | 0.5         |
| MMP15 | chr16 | 58038277 | rs200538593             | G | A         | 4   | 1  | 3   | African American | 0.5         | 0.5         |
| MMP15 | chr16 | 58038306 | rs747308827             | G | A         | 2   | 0  | 2   | African American | 0.5         | 0.5         |
| MMP15 | chr16 | 58038313 | rs774413461             | G | A         | 2   | 1  | 1   | European         | 1           | 0           |
| MMP15 | chr16 | 58038321 | rs376443727             | G | A         | 114 | 6  | 108 | South Asian      | 0.859649123 | 0.245767929 |
| MMP15 | chr16 | 58038325 | rs141624298             | A | G         | 4   | 2  | 2   | European         | 1           | 0           |
| MMP15 | chr16 | 58038330 | rs776685732             | C | T         | 3   | 1  | 2   | AFR              | 0.333333333 | 0.666666667 |
| MMP15 | chr16 | 58038331 | rs759724145             | G | A         | 2   | 1  | 1   | European         | 1           | 0           |
| MMP15 | chr16 | 58038336 | rs1187420600            | C | T         | 3   | 1  | 2   | European         | 0.333333333 | 0.666666667 |
| MMP15 | chr16 | 58038360 | rs772017400             | G | A         | 2   | 1  | 1   | European         | 1           | 0           |
| MMP15 | chr16 | 58039928 | rs543011167             | G | A         | 2   | 0  | 2   | East Asian       | 0.5         | 0.5         |
| MMP15 | chr16 | 58039939 | rs780493873             | C | T         | 2   | 2  | 0   | European         | 1           | 0           |
| MMP15 | chr16 | 58039940 | rs749513199             | G | A         | 3   | 1  | 2   | African American | 0.333333333 | 0.666666667 |
| MMP15 | chr16 | 58039942 | rs535130485             | G | T         | 2   | 0  | 2   | African American | 0.5         | 0.5         |
| MMP15 | chr16 | 58039958 | rs543769931             | C | T         | 2   | 1  | 1   | European         | 1           | 0           |
| MMP15 | chr16 | 58039960 | rs773736310             | C | T         | 2   | 0  | 2   | East Asian       | 0.5         | 0.5         |
| MMP15 | chr16 | 58039991 | rs763693146             | A | T         | 4   | 1  | 3   | East Asian       | 1           | 0           |
| MMP15 | chr16 | 58039996 | rs148695510             | C | T         | 19  | 9  | 10  | European         | 0.736842105 | 0.421052632 |
| MMP15 | chr16 | 58039997 | rs142146192             | G | A         | 3   | 0  | 3   | European         | 0.666666667 | 0.444444444 |
| MMP15 | chr16 | 58040002 | rs61754770              | C | T         | 4   | 1  | 3   | European         | 1           | 0           |

|       |       |          |                    |   |   |     |     |     |                  |             |             |
|-------|-------|----------|--------------------|---|---|-----|-----|-----|------------------|-------------|-------------|
| MMP15 | chr16 | 58040006 | rs755921600        | G | A | 3   | 0   | 3   | European         | 0.666666667 | 0.444444444 |
| MMP15 | chr16 | 58040008 | rs780012914        | C | G | 2   | 0   | 2   | European         | 1           | 0           |
| MMP15 | chr16 | 58040011 | rs139344353        | A | G | 29  | 9   | 20  | African American | 0.655172414 | 0.508917955 |
| MMP15 | chr16 | 58040113 | rs1051209135       | C | T | 2   | 2   | 0   | African American | 1           | 0           |
| MMP15 | chr16 | 58040143 | rs781646832        | G | A | 2   | 0   | 2   | European         | 0.5         | 0.5         |
| MMP15 | chr16 | 58040152 | rs368633391        | C | T | 2   | 0   | 2   | South Asian      | 1           | 0           |
| MMP15 | chr16 | 58040181 | rs536687699        | T | A | 12  | 3   | 9   | Latin American 1 | 0.5         | 0.625       |
| MMP15 | chr16 | 58040579 | rs762632881        | C | T | 2   | 0   | 2   | South Asian      | 1           | 0           |
| MMP15 | chr16 | 58040609 | rs147717123        | A | G | 22  | 10  | 12  | African American | 0.454545455 | 0.615702479 |
| MMP15 | chr16 | 58040626 | rs1465946779       | T | G | 2   | 0   | 2   | Latin American 2 | 0.5         | 0.5         |
| MMP15 | chr16 | 58040644 | rs777536839        | G | A | 3   | 0   | 3   | Latin American 2 | 0.666666667 | 0.444444444 |
| MMP15 | chr16 | 58040647 | rs201935216        | G | A | 23  | 10  | 13  | European         | 0.565217391 | 0.525519849 |
| MMP15 | chr16 | 58040665 | rs148331048        | G | A | 24  | 9   | 15  | African American | 0.625       | 0.517361111 |
| MMP15 | chr16 | 58040698 | rs1056430484       | G | A | 2   | 0   | 2   | East Asian       | 0.5         | 0.5         |
| MMP15 | chr16 | 58041643 | rs776591846        | A | C | 11  | 0   | 11  | European         | 0.909090909 | 0.165289256 |
| MMP15 | chr16 | 58041665 | rs539694635        | C | T | 2   | 1   | 1   | European         | 1           | 0           |
| MMP15 | chr16 | 58041668 | rs1403069152       | C | T | 2   | 0   | 2   | Latin American 1 | 1           | 0           |
| MMP15 | chr16 | 58041670 | rs572888530        | C | T | 3   | 1   | 2   | South Asian      | 0.666666667 | 0.444444444 |
| MMP15 | chr16 | 58041671 | rs1401021637       | G | A | 9   | 4   | 5   | Latin American 1 | 1           | 0           |
| MMP15 | chr16 | 58041674 | rs200994796        | G | A | 224 | 71  | 153 | African American | 0.625       | 0.539500957 |
| MMP15 | chr16 | 58041682 | rs778891660        | C | T | 3   | 0   | 3   | European         | 1           | 0           |
| MMP15 | chr16 | 58041694 | rs746765714        | C | T | 2   | 0   | 2   | European         | 1           | 0           |
| MMP15 | chr16 | 58041695 | rs369989245        | G | A | 9   | 2   | 7   | European         | 0.555555556 | 0.567901235 |
| MMP15 | chr16 | 58041698 | rs746011827        | C | T | 3   | 1   | 2   | European         | 0.666666667 | 0.444444444 |
| MMP15 | chr16 | 58041703 | rs763559443        | C | T | 4   | 1   | 3   | African American | 0.25        | 0.75        |
| MMP15 | chr16 | 58041704 | rs111450724        | G | A | 208 | 65  | 143 | African American | 0.524038462 | 0.620377219 |
| MMP15 | chr16 | 58041709 | rs200591280        | C | T | 514 | 177 | 337 | European         | 0.721789883 | 0.452330845 |
| MMP15 | chr16 | 58041725 | rs754543993        | C | G | 10  | 7   | 3   | East Asian       | 1           | 0           |
| MMP15 | chr16 | 58041742 | rs375076496        | C | T | 28  | 15  | 13  | Latin American 1 | 0.642857143 | 0.482142857 |
| MMP15 | chr16 | 58041755 | rs41335851         | C | T | 4   | 3   | 1   | East Asian       | 0.5         | 0.625       |
| MMP15 | chr16 | 58041758 | rs770073111        | G | T | 2   | 0   | 2   | European         | 1           | 0           |
| MMP15 | chr16 | 58041776 | rs535498144        | G | A | 3   | 0   | 3   | African American | 0.333333333 | 0.666666667 |
| MMP15 | chr16 | 58041788 | rs376327026        | G | A | 2   | 0   | 2   | African American | 0.5         | 0.5         |
| MMP15 | chr16 | 58041793 | rs551256083        | G | A | 10  | 3   | 7   | East Asian       | 0.8         | 0.32        |
| MMP15 | chr16 | 58041800 | rs201216675        | A | G | 4   | 1   | 3   | European         | 0.75        | 0.375       |
| MMP15 | chr16 | 58041841 | rs772395535        | A | C | 8   | 4   | 4   | Latin American 1 | 1           | 0           |
| MMP15 | chr16 | 58041850 | rs763672023        | G | A | 5   | 0   | 5   | Latin American 2 | 0.8         | 0.32        |
| MMP15 | chr16 | 58042234 | rs200617077        | C | T | 12  | 5   | 7   | European         | 1           | 0           |
| MMP15 | chr16 | 58042235 | rs746304484        | G | A | 5   | 2   | 3   | European         | 0.4         | 0.64        |
| MMP15 | chr16 | 58042291 | rs757782458        | G | A | 2   | 0   | 2   | South Asian      | 1           | 0           |
| MMP15 | chr16 | 58042315 | rs1019254443       | G | A | 3   | 0   | 3   | African American | 0.333333333 | 0.666666667 |
| MMP15 | chr16 | 58042321 | rs139643453        | A | G | 39  | 8   | 31  | European         | 0.769230769 | 0.391847469 |
| MMP15 | chr16 | 58042339 | rs764951803        | C | T | 2   | 0   | 2   | AFR              | 0.5         | 0.5         |
| MMP15 | chr16 | 58042348 | rs763191052        | G | A | 3   | 1   | 2   | European         | 0.666666667 | 0.444444444 |
| MMP15 | chr16 | 58042352 | rs148640408        | G | A | 8   | 3   | 5   | European         | 0.625       | 0.46875     |
| MMP15 | chr16 | 58042354 | chr16_58042354_T_G | T | G | 541 | 70  | 471 | European         | 0.65064695  | 0.529832821 |

|         |       |          |                    |         |      |     |     |     |                  |             |             |
|---------|-------|----------|--------------------|---------|------|-----|-----|-----|------------------|-------------|-------------|
| MMP15   | chr16 | 58042358 | rs201916686        | T       | C    | 3   | 2   | 1   | East Asian       | 1           | 0           |
| MMP15   | chr16 | 58042363 | rs768137640        | T       | A    | 2   | 0   | 2   | European         | 1           | 0           |
| MMP15   | chr16 | 58043216 | rs372092432        | G       | A    | 4   | 2   | 2   | African American | 0.75        | 0.375       |
| MMP15   | chr16 | 58043237 | rs769667733        | C       | T    | 2   | 0   | 2   | Latin American 2 | 0.5         | 0.5         |
| MMP15   | chr16 | 58043243 | rs1285772154       | T       | A    | 2   | 0   | 2   | African American | 0.5         | 0.5         |
| MMP15   | chr16 | 58043264 | rs367977938        | C       | T    | 8   | 1   | 7   | European         | 0.375       | 0.75        |
| MMP15   | chr16 | 58043282 | rs201800162        | T       | C    | 5   | 1   | 4   | European         | 1           | 0           |
| MMP15   | chr16 | 58043299 | rs760059840        | C       | T    | 2   | 1   | 1   | Latin American 1 | 1           | 0           |
| MMP15   | chr16 | 58043300 | rs765698866        | G       | A    | 6   | 1   | 5   | European         | 0.666666667 | 0.5         |
| MMP15   | chr16 | 58043309 | rs751230902        | C       | T    | 4   | 1   | 3   | Latin American 1 | 0.75        | 0.375       |
| MMP15   | chr16 | 58043338 | rs1418093964       | A       | G    | 8   | 6   | 2   | Latin American 1 | 1           | 0           |
| MMP15   | chr16 | 58043344 | rs780024867        | T       | C    | 3   | 0   | 3   | Latin American 2 | 1           | 0           |
| MMP15   | chr16 | 58043531 | rs765880502        | G       | A    | 9   | 4   | 5   | East Asian       | 1           | 0           |
| MMP15   | chr16 | 58043540 | rs754933485        | C       | T    | 2   | 0   | 2   | East Asian       | 1           | 0           |
| MMP15   | chr16 | 58043550 | rs747937815        | C       | G    | 3   | 0   | 3   | South Asian      | 1           | 0           |
| MMP15   | chr16 | 58045016 | rs762146278        | A       | G    | 2   | 2   | 0   | African American | 0.5         | 0.5         |
| MMP15   | chr16 | 58045048 | rs146799826        | G       | A    | 189 | 73  | 116 | African American | 0.439153439 | 0.619971445 |
| MMP15   | chr16 | 58045058 | rs145741499        | G       | A    | 5   | 1   | 4   | African American | 0.6         | 0.48        |
| MMP15   | chr16 | 58045064 | rs148956674        | G       | A    | 5   | 1   | 4   | European         | 0.8         | 0.32        |
| MMP15   | chr16 | 58045123 | rs372957851        | G       | A    | 2   | 1   | 1   | African American | 0.5         | 0.5         |
| MMP15   | chr16 | 58045139 | rs745546321        | G       | A    | 2   | 1   | 1   | European         | 1           | 0           |
| MMP15   | chr16 | 58045147 | rs372389085        | G       | A    | 2   | 1   | 1   | African American | 0.5         | 0.5         |
| MMP15   | chr16 | 58045157 | rs774426363        | G       | A    | 2   | 1   | 1   | East Asian       | 0.5         | 0.5         |
| MMP15   | chr16 | 58045160 | rs750193075        | C       | T    | 2   | 0   | 2   | European         | 0.5         | 0.5         |
| MMP15   | chr16 | 58045174 | rs200566682        | C       | T    | 48  | 21  | 27  | European         | 0.854166667 | 0.262152778 |
| MMP15   | chr16 | 58045177 | rs779536762        | G       | A    | 4   | 1   | 3   | European         | 0.5         | 0.5         |
| MMP15   | chr16 | 58045189 | rs563304189        | C       | G    | 55  | 25  | 30  | African American | 0.545454545 | 0.578512397 |
| MMP15   | chr16 | 58045192 | rs1462289613       | G       | A    | 2   | 1   | 1   | European         | 1           | 0           |
| MMP15   | chr16 | 58045265 | rs528280390        | G       | A    | 3   | 1   | 2   | African American | 1           | 0           |
| MMP15   | chr16 | 58045270 | rs61729296         | C       | T    | 2   | 0   | 2   | African American | 0.5         | 0.5         |
| MMP15   | chr16 | 58045293 | rs1020034929       | G       | T    | 15  | 3   | 12  | Latin American 1 | 1           | 0           |
| MMP15   | chr16 | 58045300 | rs41434246         | C       | T    | 316 | 108 | 208 | African American | 0.509493671 | 0.60338888  |
| MMP15   | chr16 | 58045301 | rs752825749        | G       | A    | 4   | 0   | 4   | European         | 0.75        | 0.375       |
| MMP15   | chr16 | 58045316 | rs371732794        | T       | C    | 2   | 0   | 2   | Latin American 1 | 1           | 0           |
| MMP15   | chr16 | 58045331 | rs1334673025       | CACT    | C    | 2   | 0   | 2   | South Asian      | 1           | 0           |
| MMP15   | chr16 | 58045332 | rs984805031        | ACTGCTG | A    | 2   | 1   | 1   | African American | 1           | 0           |
| MMP15   | chr16 | 58045364 | rs141377329        | C       | T    | 127 | 37  | 90  | African American | 0.637795276 | 0.54014508  |
| MMP15   | chr16 | 58045379 | rs144513455        | A       | G    | 2   | 0   | 2   | European         | 1           | 0           |
| MMP15   | chr16 | 58045388 | rs148397325        | G       | A    | 2   | 1   | 1   | European         | 0.5         | 0.5         |
| ANKRD11 | chr16 | 89268615 | chr16_89268615_C_T | C       | T    | 2   | 0   | 2   | African American | 0.5         | 0.5         |
| ANKRD11 | chr16 | 89270822 | rs767216450        | T       | G    | 13  | 5   | 8   | Latin American 1 | 0.769230769 | 0.378698225 |
| ANKRD11 | chr16 | 89279341 | rs1371024836       | T       | TCAG | 4   | 1   | 3   | African American | 0.75        | 0.375       |
| ANKRD11 | chr16 | 89279375 | rs927582667        | A       | C    | 3   | 1   | 2   | African American | 0.666666667 | 0.444444444 |
| ANKRD11 | chr16 | 89279424 | chr16_89279424_C_G | C       | G    | 2   | 1   | 1   | Latin American 1 | 1           | 0           |
| ANKRD11 | chr16 | 89279437 | rs904015120        | C       | A    | 5   | 1   | 4   | African American | 0.6         | 0.56        |
| ANKRD11 | chr16 | 89279455 | rs769501453        | G       | C    | 6   | 0   | 6   | European         | 1           | 0           |

|         |       |          |                    |   |         |     |    |    |                  |             |             |
|---------|-------|----------|--------------------|---|---------|-----|----|----|------------------|-------------|-------------|
| ANKRD11 | chr16 | 89279463 | rs1399426960       | G | A       | 3   | 2  | 1  | European         | 1           | 0           |
| ANKRD11 | chr16 | 89279464 | rs1364484079       | C | T       | 2   | 0  | 2  | South Asian      | 1           | 0           |
| ANKRD11 | chr16 | 89279467 | rs1379741073       | A | C       | 12  | 1  | 11 | South Asian      | 0.583333333 | 0.486111111 |
| ANKRD11 | chr16 | 89279557 | rs760933701        | C | T       | 14  | 5  | 9  | African American | 0.571428571 | 0.489795918 |
| ANKRD11 | chr16 | 89279565 | rs576742682        | G | A       | 39  | 16 | 23 | African American | 0.58974359  | 0.55095332  |
| ANKRD11 | chr16 | 89279565 | chr16_89279565_G_C | G | C       | 11  | 5  | 6  | European         | 0.818181818 | 0.297520661 |
| ANKRD11 | chr16 | 89279568 | rs754567522        | T | C       | 4   | 1  | 3  | Native American  | 1           | 0           |
| ANKRD11 | chr16 | 89279607 | rs749121556        | G | A       | 2   | 1  | 1  | European         | 1           | 0           |
| ANKRD11 | chr16 | 89279623 | rs575642464        | G | A       | 35  | 15 | 20 | European         | 0.542857143 | 0.542040816 |
| ANKRD11 | chr16 | 89279632 | rs905177395        | C | T       | 5   | 4  | 1  | European         | 1           | 0           |
| ANKRD11 | chr16 | 89279640 | chr16_89279640_G_A | G | A       | 2   | 0  | 2  | Native American  | 1           | 0           |
| ANKRD11 | chr16 | 89279643 | rs903253722        | G | A       | 16  | 7  | 9  | Latin American 2 | 0.75        | 0.40625     |
| ANKRD11 | chr16 | 89279644 | rs897670799        | C | T       | 2   | 1  | 1  | African American | 0.5         | 0.5         |
| ANKRD11 | chr16 | 89279646 | rs999284780        | G | A       | 2   | 1  | 1  | African American | 1           | 0           |
| ANKRD11 | chr16 | 89279656 | rs893421448        | C | T       | 3   | 0  | 3  | South Asian      | 1           | 0           |
| ANKRD11 | chr16 | 89279674 | rs374668457        | G | A       | 56  | 21 | 35 | East Asian       | 0.839285714 | 0.286352041 |
| ANKRD11 | chr16 | 89279715 | rs573355746        | G | A       | 80  | 32 | 48 | Latin American 1 | 0.525       | 0.5215625   |
| ANKRD11 | chr16 | 89279716 | rs201957371        | G | A       | 129 | 49 | 80 | African American | 0.519379845 | 0.614025599 |
| ANKRD11 | chr16 | 89279719 | rs750990942        | C | T       | 5   | 1  | 4  | South Asian      | 0.8         | 0.32        |
| ANKRD11 | chr16 | 89279719 | chr16_89279719_C_A | C | A       | 2   | 1  | 1  | African American | 0.5         | 0.5         |
| ANKRD11 | chr16 | 89279736 | rs1445518002       | C | G       | 7   | 3  | 4  | Latin American 1 | 0.857142857 | 0.244897959 |
| ANKRD11 | chr16 | 89279745 | rs748996527        | G | A       | 21  | 8  | 13 | European         | 0.952380952 | 0.090702948 |
| ANKRD11 | chr16 | 89279751 | rs565435346        | G | A       | 25  | 10 | 15 | African American | 0.52        | 0.6016      |
| ANKRD11 | chr16 | 89279761 | rs770262960        | C | T       | 26  | 2  | 24 | South Asian      | 0.846153846 | 0.272189349 |
| ANKRD11 | chr16 | 89279782 | rs1003478010       | C | T       | 5   | 0  | 5  | AFR              | 0.6         | 0.56        |
| ANKRD11 | chr16 | 89279796 | rs201043388        | C | T       | 97  | 25 | 72 | African American | 0.474226804 | 0.674460623 |
| ANKRD11 | chr16 | 89279797 | rs202081612        | G | A       | 33  | 7  | 26 | African American | 0.575757576 | 0.56932966  |
| ANKRD11 | chr16 | 89279809 | rs756897044        | G | T       | 2   | 1  | 1  | European         | 1           | 0           |
| ANKRD11 | chr16 | 89279812 | rs200852197        | C | T       | 69  | 21 | 48 | Latin American 1 | 0.536231884 | 0.566687671 |
| ANKRD11 | chr16 | 89279814 | chr16_89279814_G_A | G | A       | 2   | 0  | 2  | South Asian      | 1           | 0           |
| ANKRD11 | chr16 | 89279817 | rs372632879        | G | A       | 84  | 25 | 59 | African American | 0.547619048 | 0.596655329 |
| ANKRD11 | chr16 | 89279830 | rs770209899        | T | C       | 14  | 1  | 13 | European         | 0.571428571 | 0.489795918 |
| ANKRD11 | chr16 | 89279844 | rs570265865        | C | T       | 25  | 10 | 15 | European         | 0.68        | 0.4736      |
| ANKRD11 | chr16 | 89279848 | rs760007187        | G | A       | 3   | 3  | 0  | African American | 1           | 0           |
| ANKRD11 | chr16 | 89279862 | rs764885268        | G | A       | 3   | 0  | 3  | South Asian      | 0.666666667 | 0.444444444 |
| ANKRD11 | chr16 | 89279865 | rs764722888        | A | ACCGTCT | 2   | 0  | 2  | South Asian      | 1           | 0           |
| ANKRD11 | chr16 | 89279866 | rs1169229013       | C | T       | 3   | 0  | 3  | European         | 1           | 0           |
| ANKRD11 | chr16 | 89279883 | rs758225743        | G | A       | 2   | 0  | 2  | East Asian       | 0.5         | 0.5         |
| ANKRD11 | chr16 | 89279924 | rs774615667        | C | A       | 2   | 1  | 1  | European         | 1           | 0           |
| ANKRD11 | chr16 | 89279935 | rs776150975        | G | A       | 4   | 1  | 3  | European         | 0.75        | 0.375       |
| ANKRD11 | chr16 | 89279940 | rs371524118        | G | A       | 5   | 1  | 4  | European         | 1           | 0           |
| ANKRD11 | chr16 | 89279949 | rs751378641        | C | T       | 7   | 3  | 4  | Latin American 1 | 0.857142857 | 0.244897959 |
| ANKRD11 | chr16 | 89279962 | rs201589586        | G | C       | 18  | 6  | 12 | European         | 0.888888889 | 0.203703704 |
| ANKRD11 | chr16 | 89279971 | rs757615498        | G | A       | 14  | 8  | 6  | Latin American 1 | 0.785714286 | 0.336734694 |
| ANKRD11 | chr16 | 89279982 | rs202216051        | G | A       | 31  | 9  | 22 | African American | 0.677419355 | 0.48491155  |
| ANKRD11 | chr16 | 89279998 | rs762590968        | C | T       | 4   | 0  | 4  | East Asian       | 0.5         | 0.5         |

|         |       |          |                    |               |           |     |     |     |                  |             |             |
|---------|-------|----------|--------------------|---------------|-----------|-----|-----|-----|------------------|-------------|-------------|
| ANKRD11 | chr16 | 89280036 | rs573380956        | C             | T         | 4   | 0   | 4   | South Asian      | 0.75        | 0.375       |
| ANKRD11 | chr16 | 89280042 | rs777253893        | G             | A         | 2   | 1   | 1   | European         | 0.5         | 0.5         |
| ANKRD11 | chr16 | 89280044 | rs748812288        | C             | A         | 2   | 0   | 2   | European         | 0.5         | 0.5         |
| ANKRD11 | chr16 | 89280045 | rs74033733         | A             | C         | 421 | 104 | 317 | African American | 0.6152019   | 0.544693384 |
| ANKRD11 | chr16 | 89280046 | rs149834477        | T             | C         | 2   | 0   | 2   | African American | 0.5         | 0.5         |
| ANKRD11 | chr16 | 89280058 | rs202219869        | G             | A         | 8   | 2   | 6   | European         | 1           | 0           |
| ANKRD11 | chr16 | 89280081 | rs751980813        | T             | G         | 2   | 1   | 1   | East Asian       | 1           | 0           |
| ANKRD11 | chr16 | 89280090 | rs778524990        | C             | G         | 2   | 1   | 1   | Latin American 1 | 1           | 0           |
| ANKRD11 | chr16 | 89280111 | rs765205440        | T             | C         | 2   | 1   | 1   | European         | 1           | 0           |
| ANKRD11 | chr16 | 89280168 | rs753162681        | G             | A         | 4   | 0   | 4   | Latin American 2 | 0.5         | 0.5         |
| ANKRD11 | chr16 | 89280169 | rs764665666        | C             | T         | 2   | 0   | 2   | East Asian       | 0.5         | 0.5         |
| ANKRD11 | chr16 | 89280180 | rs747992186        | G             | A         | 2   | 1   | 1   | European         | 1           | 0           |
| ANKRD11 | chr16 | 89280192 | rs749269329        | G             | A         | 2   | 1   | 1   | European         | 0.5         | 0.5         |
| ANKRD11 | chr16 | 89280200 | chr16_89280200_C_G | C             | G         | 2   | 2   | 0   | Latin American 1 | 1           | 0           |
| ANKRD11 | chr16 | 89280201 | rs1310484071       | T             | C         | 2   | 1   | 1   | European         | 0.5         | 0.5         |
| ANKRD11 | chr16 | 89280205 | rs370535812        | C             | T         | 5   | 3   | 2   | African American | 0.6         | 0.56        |
| ANKRD11 | chr16 | 89280219 | rs201509886        | C             | T         | 67  | 27  | 40  | African American | 0.76119403  | 0.392069503 |
| ANKRD11 | chr16 | 89280235 | rs749215903        | G             | C         | 4   | 0   | 4   | Latin American 2 | 0.75        | 0.375       |
| ANKRD11 | chr16 | 89280258 | rs938667477        | A             | C         | 2   | 1   | 1   | European         | 0.5         | 0.5         |
| ANKRD11 | chr16 | 89280259 | rs772144411        | G             | C         | 2   | 0   | 2   | Latin American 1 | 0.5         | 0.5         |
| ANKRD11 | chr16 | 89280273 | rs776927590        | G             | C         | 2   | 1   | 1   | African American | 1           | 0           |
| ANKRD11 | chr16 | 89280280 | rs753691962        | C             | T         | 6   | 3   | 3   | Latin American 1 | 0.666666667 | 0.5         |
| ANKRD11 | chr16 | 89280280 | chr16_89280280_C_G | C             | G         | 3   | 1   | 2   | African American | 0.666666667 | 0.444444444 |
| ANKRD11 | chr16 | 89280288 | rs755786402        | C             | G         | 6   | 2   | 4   | European         | 1           | 0           |
| ANKRD11 | chr16 | 89280307 | rs375484982        | C             | T         | 2   | 0   | 2   | African American | 0.5         | 0.5         |
| ANKRD11 | chr16 | 89280321 | rs201401760        | T             | G         | 37  | 16  | 21  | African American | 0.621621622 | 0.506939372 |
| ANKRD11 | chr16 | 89280343 | rs781573469        | TGAfrican Ame | T         | 10  | 1   | 9   | Latin American 1 | 0.4         | 0.7         |
| ANKRD11 | chr16 | 89280348 | rs368831797        | A             | G         | 2   | 0   | 2   | European         | 0.5         | 0.5         |
| ANKRD11 | chr16 | 89280349 | rs200351209        | A             | G         | 37  | 16  | 21  | African American | 0.621621622 | 0.506939372 |
| ANKRD11 | chr16 | 89280354 | rs373782987        | T             | C         | 7   | 2   | 5   | African American | 0.714285714 | 0.408163265 |
| ANKRD11 | chr16 | 89280366 | chr16_89280366_G_A | G             | A         | 2   | 2   | 0   | African American | 1           | 0           |
| ANKRD11 | chr16 | 89280384 | rs765013102        | G             | A         | 3   | 1   | 2   | African American | 0.666666667 | 0.444444444 |
| ANKRD11 | chr16 | 89280402 | rs199691161        | G             | C         | 23  | 7   | 16  | African American | 0.565217391 | 0.570888469 |
| ANKRD11 | chr16 | 89280406 | rs749615651        | C             | T         | 2   | 1   | 1   | Latin American 1 | 1           | 0           |
| ANKRD11 | chr16 | 89280412 | rs372141194        | C             | T         | 11  | 3   | 8   | European         | 0.727272727 | 0.429752066 |
| ANKRD11 | chr16 | 89280417 | rs534182728        | T             | C         | 64  | 11  | 53  | Latin American 1 | 0.671875    | 0.450683594 |
| ANKRD11 | chr16 | 89280427 | rs376679880        | C             | T         | 16  | 8   | 8   | Latin American 1 | 0.5         | 0.5546875   |
| ANKRD11 | chr16 | 89280429 | rs370006772        | T             | G         | 6   | 2   | 4   | European         | 0.833333333 | 0.277777778 |
| ANKRD11 | chr16 | 89280430 | rs200724087        | T             | C         | 45  | 14  | 31  | European         | 0.777777778 | 0.369382716 |
| ANKRD11 | chr16 | 89280436 | rs201636725        | C             | T         | 286 | 84  | 202 | African American | 0.636363636 | 0.543889677 |
| ANKRD11 | chr16 | 89280447 | rs746355740        | G             | A         | 4   | 1   | 3   | European         | 0.75        | 0.375       |
| ANKRD11 | chr16 | 89280457 | rs199785661        | C             | T         | 21  | 3   | 18  | European         | 0.714285714 | 0.430839002 |
| ANKRD11 | chr16 | 89280463 | rs759486921        | G             | C         | 13  | 3   | 10  | European         | 1           | 0           |
| ANKRD11 | chr16 | 89280466 | rs749868016        | C             | CGTACGGGG | 2   | 0   | 2   | African American | 1           | 0           |
| ANKRD11 | chr16 | 89280477 | rs373218212        | G             | A         | 46  | 17  | 29  | European         | 0.826086957 | 0.310018904 |
| ANKRD11 | chr16 | 89280481 | rs775221712        | AGGCGGGAGG    | A         | 8   | 3   | 5   | European         | 0.375       | 0.71875     |

|         |       |          |                    |             |      |     |     |     |                  |             |             |
|---------|-------|----------|--------------------|-------------|------|-----|-----|-----|------------------|-------------|-------------|
| ANKRD11 | chr16 | 89280498 | rs770628197        | T           | G    | 6   | 1   | 5   | European         | 0.833333333 | 0.277777778 |
| ANKRD11 | chr16 | 89280522 | rs200531141        | G           | A    | 77  | 17  | 60  | African American | 0.558441558 | 0.592005397 |
| ANKRD11 | chr16 | 89280544 | rs777086823        | G           | A    | 12  | 4   | 8   | Native American  | 0.583333333 | 0.486111111 |
| ANKRD11 | chr16 | 89280552 | rs370272709        | G           | A    | 5   | 1   | 4   | European         | 0.6         | 0.56        |
| ANKRD11 | chr16 | 89280555 | rs768652993        | G           | A    | 3   | 0   | 3   | Latin American 2 | 1           | 0           |
| ANKRD11 | chr16 | 89280568 | rs763207005        | T           | C    | 2   | 1   | 1   | African American | 0.5         | 0.5         |
| ANKRD11 | chr16 | 89280582 | rs750094695        | A           | G    | 4   | 0   | 4   | European         | 1           | 0           |
| ANKRD11 | chr16 | 89280612 | rs867065526        | G           | A    | 3   | 0   | 3   | Latin American 2 | 1           | 0           |
| ANKRD11 | chr16 | 89280631 | rs199737737        | C           | G    | 5   | 2   | 3   | European         | 0.6         | 0.56        |
| ANKRD11 | chr16 | 89280634 | rs202044071        | G           | A    | 5   | 1   | 4   | Latin American 2 | 0.6         | 0.48        |
| ANKRD11 | chr16 | 89280634 | chr16_89280634_G_T | G           | T    | 4   | 1   | 3   | East Asian       | 1           | 0           |
| ANKRD11 | chr16 | 89280660 | rs199964892        | C           | G    | 3   | 1   | 2   | Latin American 2 | 0.666666667 | 0.444444444 |
| ANKRD11 | chr16 | 89280667 | rs372148958        | C           | T    | 13  | 5   | 8   | Latin American 1 | 0.923076923 | 0.142011834 |
| ANKRD11 | chr16 | 89280672 | rs922813408        | G           | A    | 4   | 1   | 3   | African American | 0.25        | 0.75        |
| ANKRD11 | chr16 | 89280703 | rs757293729        | G           | A    | 2   | 0   | 2   | Latin American 2 | 0.5         | 0.5         |
| ANKRD11 | chr16 | 89280721 | rs747409293        | C           | T    | 3   | 0   | 3   | Latin American 2 | 0.666666667 | 0.444444444 |
| ANKRD11 | chr16 | 89280750 | rs760463786        | AGGTAGCTGGG | A    | 2   | 1   | 1   | European         | 1           | 0           |
| ANKRD11 | chr16 | 89280765 | rs778991139        | G           | A    | 2   | 1   | 1   | Latin American 1 | 1           | 0           |
| ANKRD11 | chr16 | 89280769 | rs199914958        | G           | T    | 17  | 9   | 8   | European         | 0.882352941 | 0.214532872 |
| ANKRD11 | chr16 | 89280774 | chr16_89280774_A_G | A           | G    | 2   | 0   | 2   | East Asian       | 0.5         | 0.5         |
| ANKRD11 | chr16 | 89280775 | chr16_89280775_T_C | T           | C    | 2   | 0   | 2   | East Asian       | 0.5         | 0.5         |
| ANKRD11 | chr16 | 89280804 | rs142373563        | G           | T    | 57  | 12  | 45  | African American | 0.473684211 | 0.638350262 |
| ANKRD11 | chr16 | 89280806 | rs765117665        | G           | T    | 3   | 0   | 3   | European         | 1           | 0           |
| ANKRD11 | chr16 | 89280844 | rs1214901940       | C           | T    | 3   | 0   | 3   | Latin American 2 | 1           | 0           |
| ANKRD11 | chr16 | 89280862 | rs768300352        | G           | T    | 2   | 0   | 2   | East Asian       | 1           | 0           |
| ANKRD11 | chr16 | 89280877 | rs202034147        | T           | C    | 102 | 36  | 66  | East Asian       | 0.970588235 | 0.057093426 |
| ANKRD11 | chr16 | 89280910 | rs143743958        | A           | G    | 24  | 3   | 21  | European         | 0.541666667 | 0.53125     |
| ANKRD11 | chr16 | 89280912 | rs768249075        | G           | A    | 2   | 0   | 2   | European         | 1           | 0           |
| ANKRD11 | chr16 | 89280913 | rs142527333        | G           | A    | 23  | 7   | 16  | African American | 0.565217391 | 0.570888469 |
| ANKRD11 | chr16 | 89280919 | rs367577142        | C           | T    | 2   | 0   | 2   | European         | 1           | 0           |
| ANKRD11 | chr16 | 89280960 | rs1330096633       | T           | C    | 3   | 0   | 3   | European         | 0.666666667 | 0.444444444 |
| ANKRD11 | chr16 | 89280964 | rs144516367        | G           | A    | 37  | 12  | 25  | European         | 0.513513514 | 0.648648649 |
| ANKRD11 | chr16 | 89281023 | rs139088883        | G           | A    | 4   | 0   | 4   | European         | 0.5         | 0.625       |
| ANKRD11 | chr16 | 89281024 | rs144003224        | C           | T    | 9   | 3   | 6   | Latin American 1 | 0.444444444 | 0.691358025 |
| ANKRD11 | chr16 | 89281033 | rs145906515        | G           | A    | 289 | 103 | 186 | European         | 0.557093426 | 0.606817447 |
| ANKRD11 | chr16 | 89281035 | rs762090938        | G           | A    | 2   | 0   | 2   | South Asian      | 1           | 0           |
| ANKRD11 | chr16 | 89281049 | rs768500822        | G           | GTCT | 17  | 5   | 12  | African American | 0.411764706 | 0.733564014 |
| ANKRD11 | chr16 | 89281060 | chr16_89281060_A_T | A           | T    | 2   | 0   | 2   | East Asian       | 1           | 0           |
| ANKRD11 | chr16 | 89281074 | rs372569223        | G           | C    | 5   | 3   | 2   | European         | 1           | 0           |
| ANKRD11 | chr16 | 89281078 | rs373805397        | C           | T    | 10  | 3   | 7   | East Asian       | 1           | 0           |
| ANKRD11 | chr16 | 89281129 | rs151288302        | C           | T    | 40  | 14  | 26  | African American | 0.525       | 0.62375     |
| ANKRD11 | chr16 | 89281129 | chr16_89281129_C_A | C           | A    | 4   | 0   | 4   | European         | 0.5         | 0.5         |
| ANKRD11 | chr16 | 89281144 | rs369218399        | C           | T    | 4   | 0   | 4   | European         | 1           | 0           |
| ANKRD11 | chr16 | 89281204 | rs75362060         | C           | T    | 477 | 171 | 306 | European         | 0.528301887 | 0.605997477 |
| ANKRD11 | chr16 | 89281204 | chr16_89281204_C_A | C           | A    | 2   | 0   | 2   | East Asian       | 1           | 0           |
| ANKRD11 | chr16 | 89281210 | chr16_89281210_C_T | C           | T    | 2   | 0   | 2   | South Asian      | 1           | 0           |

|         |       |          |                    |             |           |     |    |    |                  |             |             |
|---------|-------|----------|--------------------|-------------|-----------|-----|----|----|------------------|-------------|-------------|
| ANKRD11 | chr16 | 89281219 | rs559618415        | C           | T         | 2   | 2  | 0  | European         | 0.5         | 0.5         |
| ANKRD11 | chr16 | 89281227 | rs776119333        | G           | A         | 8   | 1  | 7  | European         | 0.375       | 0.6875      |
| ANKRD11 | chr16 | 89281242 | rs146303178        | G           | A         | 2   | 1  | 1  | European         | 1           | 0           |
| ANKRD11 | chr16 | 89281279 | rs752613308        | C           | T         | 2   | 1  | 1  | European         | 1           | 0           |
| ANKRD11 | chr16 | 89281291 | rs201278036        | C           | T         | 2   | 0  | 2  | Latin American 2 | 0.5         | 0.5         |
| ANKRD11 | chr16 | 89281305 | rs561668093        | G           | A         | 3   | 1  | 2  | East Asian       | 0.666666667 | 0.444444444 |
| ANKRD11 | chr16 | 89281309 | rs772727317        | A           | T         | 2   | 0  | 2  | European         | 1           | 0           |
| ANKRD11 | chr16 | 89281311 | rs762398457        | T           | A         | 3   | 3  | 0  | European         | 0.666666667 | 0.444444444 |
| ANKRD11 | chr16 | 89281312 | rs770511968        | G           | C         | 5   | 1  | 4  | European         | 0.8         | 0.32        |
| ANKRD11 | chr16 | 89281321 | rs541046005        | C           | T         | 3   | 0  | 3  | African American | 0.333333333 | 0.666666667 |
| ANKRD11 | chr16 | 89281326 | rs757264535        | C           | T         | 3   | 0  | 3  | European         | 0.666666667 | 0.444444444 |
| ANKRD11 | chr16 | 89281344 | rs148243995        | G           | A         | 113 | 43 | 70 | Latin American 1 | 0.495575221 | 0.598793954 |
| ANKRD11 | chr16 | 89281345 | rs780508146        | C           | T         | 2   | 0  | 2  | Latin American 2 | 1           | 0           |
| ANKRD11 | chr16 | 89281357 | rs368667754        | C           | T         | 4   | 0  | 4  | East Asian       | 1           | 0           |
| ANKRD11 | chr16 | 89281359 | rs955262955        | C           | G         | 2   | 0  | 2  | African American | 1           | 0           |
| ANKRD11 | chr16 | 89281368 | rs764002055        | G           | A         | 2   | 0  | 2  | European         | 1           | 0           |
| ANKRD11 | chr16 | 89281390 | rs751869374        | C           | A         | 2   | 0  | 2  | AFR              | 1           | 0           |
| ANKRD11 | chr16 | 89281404 | rs748594316        | G           | A         | 3   | 1  | 2  | African American | 0.333333333 | 0.666666667 |
| ANKRD11 | chr16 | 89281447 | rs749845953        | G           | A         | 2   | 1  | 1  | African American | 0.5         | 0.5         |
| ANKRD11 | chr16 | 89281454 | rs146205997        | G           | C         | 89  | 26 | 63 | Latin American 1 | 0.483146067 | 0.684004545 |
| ANKRD11 | chr16 | 89281551 | rs201160642        | G           | A         | 4   | 0  | 4  | AFR              | 0.25        | 0.75        |
| ANKRD11 | chr16 | 89281552 | rs139814582        | C           | T         | 2   | 1  | 1  | African American | 1           | 0           |
| ANKRD11 | chr16 | 89281614 | rs147690079        | G           | T         | 19  | 11 | 8  | Latin American 1 | 1           | 0           |
| ANKRD11 | chr16 | 89281614 | chr16_89281614_G_A | G           | A         | 2   | 0  | 2  | European         | 1           | 0           |
| ANKRD11 | chr16 | 89281630 | chr16_89281630_G_A | G           | A         | 4   | 1  | 3  | European         | 0.75        | 0.375       |
| ANKRD11 | chr16 | 89281665 | rs748427842        | G           | A         | 2   | 0  | 2  | African American | 0.5         | 0.5         |
| ANKRD11 | chr16 | 89281666 | chr16_89281666_G_T | G           | T         | 2   | 0  | 2  | European         | 0.5         | 0.5         |
| ANKRD11 | chr16 | 89281701 | rs553093779        | C           | A         | 2   | 0  | 2  | European         | 1           | 0           |
| ANKRD11 | chr16 | 89281898 | rs145653946        | C           | T         | 3   | 1  | 2  | African American | 1           | 0           |
| ANKRD11 | chr16 | 89281923 | rs145415643        | T           | C         | 40  | 11 | 29 | African American | 0.7         | 0.47625     |
| ANKRD11 | chr16 | 89281963 | rs777979146        | C           | T         | 2   | 0  | 2  | Latin American 1 | 0.5         | 0.5         |
| ANKRD11 | chr16 | 89282005 | rs1289430140       | C           | T         | 2   | 1  | 1  | African American | 0.5         | 0.5         |
| ANKRD11 | chr16 | 89282007 | rs780686131        | C           | T         | 2   | 1  | 1  | European         | 1           | 0           |
| ANKRD11 | chr16 | 89282008 | rs372367879        | G           | A         | 4   | 0  | 4  | African American | 0.5         | 0.625       |
| ANKRD11 | chr16 | 89282013 | rs770592504        | G           | A         | 3   | 1  | 2  | Latin American 1 | 0.666666667 | 0.444444444 |
| ANKRD11 | chr16 | 89282035 | rs537684815        | C           | T         | 6   | 0  | 6  | South Asian      | 1           | 0           |
| ANKRD11 | chr16 | 89282043 | rs534329317        | TGCTCGTCCCT | T         | 39  | 4  | 35 | South Asian      | 0.487179487 | 0.61669954  |
| ANKRD11 | chr16 | 89282043 | rs762626265        | T           | TGCTCGTCC | 5   | 0  | 5  | African American | 0.2         | 0.8         |
| ANKRD11 | chr16 | 89282056 | rs765525860        | G           | T         | 3   | 2  | 1  | European         | 1           | 0           |
| ANKRD11 | chr16 | 89282071 | rs1296165234       | C           | T         | 9   | 2  | 7  | Latin American 1 | 1           | 0           |
| ANKRD11 | chr16 | 89282078 | rs148191751        | G           | T         | 13  | 0  | 13 | African American | 0.769230769 | 0.378698225 |
| ANKRD11 | chr16 | 89282086 | rs189656772        | G           | A         | 3   | 0  | 3  | European         | 0.666666667 | 0.444444444 |
| ANKRD11 | chr16 | 89282089 | rs770463986        | G           | C         | 2   | 1  | 1  | African American | 0.5         | 0.5         |
| ANKRD11 | chr16 | 89282100 | rs148065431        | G           | A         | 13  | 5  | 8  | East Asian       | 0.923076923 | 0.142011834 |
| ANKRD11 | chr16 | 89282124 | rs748649276        | T           | C         | 2   | 1  | 1  | European         | 1           | 0           |
| ANKRD11 | chr16 | 89282149 | rs746788345        | G           | T         | 2   | 0  | 2  | European         | 1           | 0           |

|         |       |          |                    |             |            |     |    |    |                  |             |             |
|---------|-------|----------|--------------------|-------------|------------|-----|----|----|------------------|-------------|-------------|
| ANKRD11 | chr16 | 89282151 | rs147285830        | T           | C          | 8   | 2  | 6  | European         | 1           | 0           |
| ANKRD11 | chr16 | 89282157 | rs753054998        | CTCT        | C          | 3   | 1  | 2  | Latin American 1 | 0.666666667 | 0.444444444 |
| ANKRD11 | chr16 | 89282160 | rs769926682        | T           | C          | 5   | 2  | 3  | European         | 1           | 0           |
| ANKRD11 | chr16 | 89282255 | rs369930119        | A           | T          | 9   | 3  | 6  | African American | 0.444444444 | 0.592592593 |
| ANKRD11 | chr16 | 89282300 | rs778347369        | ATCT        | A          | 32  | 13 | 19 | African American | 0.53125     | 0.603515625 |
| ANKRD11 | chr16 | 89282301 | rs1288680584       | T           | C          | 2   | 0  | 2  | South Asian      | 1           | 0           |
| ANKRD11 | chr16 | 89282305 | rs140373729        | C           | T          | 42  | 14 | 28 | European         | 0.761904762 | 0.382086168 |
| ANKRD11 | chr16 | 89282307 | rs578198369        | A           | G          | 13  | 5  | 8  | European         | 0.846153846 | 0.272189349 |
| ANKRD11 | chr16 | 89282329 | rs1013514926       | A           | C          | 2   | 0  | 2  | Latin American 1 | 1           | 0           |
| ANKRD11 | chr16 | 89282355 | rs560837281        | A           | T          | 2   | 0  | 2  | European         | 0.5         | 0.5         |
| ANKRD11 | chr16 | 89282374 | rs201207422        | C           | T          | 7   | 2  | 5  | European         | 1           | 0           |
| ANKRD11 | chr16 | 89282406 | rs1332796115       | T           | C          | 2   | 1  | 1  | European         | 0.5         | 0.5         |
| ANKRD11 | chr16 | 89282412 | rs754339551        | CCCTTCTCTTC | C          | 2   | 0  | 2  | European         | 0.5         | 0.5         |
| ANKRD11 | chr16 | 89282530 | rs753576509        | C           | T          | 2   | 0  | 2  | South Asian      | 1           | 0           |
| ANKRD11 | chr16 | 89282565 | rs144673419        | G           | A          | 55  | 20 | 35 | European         | 0.6         | 0.507107438 |
| ANKRD11 | chr16 | 89282569 | rs138543822        | A           | G          | 10  | 7  | 3  | East Asian       | 0.5         | 0.62        |
| ANKRD11 | chr16 | 89282569 | chr16_89282569_A_T | A           | T          | 7   | 3  | 4  | European         | 1           | 0           |
| ANKRD11 | chr16 | 89282589 | rs570483616        | G           | C          | 11  | 5  | 6  | East Asian       | 0.909090909 | 0.165289256 |
| ANKRD11 | chr16 | 89282598 | rs186068075        | G           | A          | 6   | 1  | 5  | European         | 0.833333333 | 0.277777778 |
| ANKRD11 | chr16 | 89282612 | rs777949492        | G           | C          | 2   | 0  | 2  | Latin American 2 | 1           | 0           |
| ANKRD11 | chr16 | 89282650 | rs778998883        | C           | CGTT       | 17  | 4  | 13 | African American | 0.470588235 | 0.636678201 |
| ANKRD11 | chr16 | 89282662 | rs144053389        | C           | G          | 8   | 3  | 5  | African American | 0.875       | 0.21875     |
| ANKRD11 | chr16 | 89282670 | rs377605019        | T           | C          | 4   | 1  | 3  | African American | 0.5         | 0.5         |
| ANKRD11 | chr16 | 89282683 | rs773010718        | C           | T          | 2   | 0  | 2  | East Asian       | 1           | 0           |
| ANKRD11 | chr16 | 89282701 | chr16_89282701_G_T | G           | T          | 2   | 1  | 1  | African American | 1           | 0           |
| ANKRD11 | chr16 | 89282710 | rs543173285        | T           | C          | 2   | 0  | 2  | European         | 1           | 0           |
| ANKRD11 | chr16 | 89282715 | rs762783165        | G           | A          | 2   | 0  | 2  | European         | 0.5         | 0.5         |
| ANKRD11 | chr16 | 89282716 | rs139239852        | C           | T          | 20  | 3  | 17 | African American | 0.7         | 0.475       |
| ANKRD11 | chr16 | 89282736 | chr16_89282736_T_C | T           | C          | 2   | 2  | 0  | European         | 0.5         | 0.5         |
| ANKRD11 | chr16 | 89282799 | rs752060365        | G           | A          | 5   | 0  | 5  | South Asian      | 1           | 0           |
| ANKRD11 | chr16 | 89282824 | rs1481707531       | C           | G          | 2   | 1  | 1  | European         | 1           | 0           |
| ANKRD11 | chr16 | 89282856 | rs775494693        | G           | A          | 2   | 1  | 1  | European         | 0.5         | 0.5         |
| ANKRD11 | chr16 | 89282872 | rs762090270        | C           | T          | 2   | 1  | 1  | Native American  | 1           | 0           |
| ANKRD11 | chr16 | 89282873 | rs896542526        | T           | TCTGTCCTTC | 3   | 1  | 2  | African American | 1           | 0           |
| ANKRD11 | chr16 | 89282885 | rs1356781316       | G           | T          | 2   | 0  | 2  | AFR              | 1           | 0           |
| ANKRD11 | chr16 | 89282887 | rs752033929        | C           | T          | 3   | 1  | 2  | Latin American 2 | 0.666666667 | 0.444444444 |
| ANKRD11 | chr16 | 89282929 | rs746919250        | G           | A          | 3   | 0  | 3  | Latin American 2 | 1           | 0           |
| ANKRD11 | chr16 | 89282958 | rs144199827        | C           | T          | 36  | 17 | 19 | Latin American 1 | 0.75        | 0.416666667 |
| ANKRD11 | chr16 | 89282964 | rs61744864         | G           | A          | 58  | 23 | 35 | African American | 0.551724138 | 0.580261593 |
| ANKRD11 | chr16 | 89282968 | rs774601199        | C           | T          | 2   | 0  | 2  | European         | 0.5         | 0.5         |
| ANKRD11 | chr16 | 89283049 | rs985837806        | T           | A          | 3   | 0  | 3  | Latin American 1 | 1           | 0           |
| ANKRD11 | chr16 | 89283091 | chr16_89283091_C_T | C           | T          | 2   | 2  | 0  | African American | 0.5         | 0.5         |
| ANKRD11 | chr16 | 89283100 | rs143417087        | C           | T          | 6   | 3  | 3  | European         | 1           | 0           |
| ANKRD11 | chr16 | 89283105 | rs150325340        | G           | A          | 15  | 2  | 13 | European         | 0.4         | 0.737777778 |
| ANKRD11 | chr16 | 89283111 | rs137894790        | G           | A          | 113 | 48 | 65 | East Asian       | 0.946902655 | 0.102435586 |
| ANKRD11 | chr16 | 89283111 | chr16_89283111_G_T | G           | T          | 2   | 2  | 0  | European         | 1           | 0           |

|         |       |          |                    |        |   |    |    |    |                  |             |             |
|---------|-------|----------|--------------------|--------|---|----|----|----|------------------|-------------|-------------|
| ANKRD11 | chr16 | 89283111 | chr16_89283111_G_C | G      | C | 2  | 0  | 2  | European         | 1           | 0           |
| ANKRD11 | chr16 | 89283118 | rs373193679        | C      | T | 4  | 2  | 2  | European         | 0.75        | 0.375       |
| ANKRD11 | chr16 | 89283142 | rs373554894        | C      | T | 6  | 0  | 6  | Latin American 2 | 0.666666667 | 0.444444444 |
| ANKRD11 | chr16 | 89283222 | rs747642726        | T      | C | 2  | 0  | 2  | African American | 0.5         | 0.5         |
| ANKRD11 | chr16 | 89283244 | rs746044012        | A      | G | 2  | 0  | 2  | European         | 1           | 0           |
| ANKRD11 | chr16 | 89283244 | chr16_89283244_A_T | A      | T | 2  | 1  | 1  | African American | 0.5         | 0.5         |
| ANKRD11 | chr16 | 89283260 | rs139384857        | G      | C | 8  | 3  | 5  | African American | 0.5         | 0.5         |
| ANKRD11 | chr16 | 89283268 | rs773172347        | G      | A | 7  | 4  | 3  | Latin American 1 | 0.571428571 | 0.571428571 |
| ANKRD11 | chr16 | 89283309 | rs753662123        | G      | A | 2  | 0  | 2  | European         | 0.5         | 0.5         |
| ANKRD11 | chr16 | 89283315 | rs747301279        | CTTCTT | C | 2  | 0  | 2  | Latin American 1 | 0.5         | 0.5         |
| ANKRD11 | chr16 | 89283390 | rs200756644        | T      | G | 3  | 0  | 3  | European         | 1           | 0           |
| ANKRD11 | chr16 | 89283444 | rs201522384        | C      | A | 7  | 1  | 6  | European         | 1           | 0           |
| ANKRD11 | chr16 | 89283496 | rs141871215        | C      | T | 2  | 2  | 0  | African American | 1           | 0           |
| ANKRD11 | chr16 | 89283498 | rs200650209        | G      | A | 4  | 1  | 3  | European         | 0.5         | 0.5         |
| ANKRD11 | chr16 | 89283501 | rs1483914550       | C      | A | 2  | 0  | 2  | Latin American 2 | 1           | 0           |
| ANKRD11 | chr16 | 89283505 | rs761762028        | CCTT   | C | 5  | 2  | 3  | South Asian      | 0.6         | 0.56        |
| ANKRD11 | chr16 | 89283523 | rs752918694        | G      | C | 2  | 0  | 2  | European         | 1           | 0           |
| ANKRD11 | chr16 | 89283537 | rs757870881        | C      | T | 7  | 2  | 5  | European         | 0.857142857 | 0.244897959 |
| ANKRD11 | chr16 | 89283546 | rs780895582        | G      | A | 10 | 3  | 7  | Latin American 1 | 0.6         | 0.54        |
| ANKRD11 | chr16 | 89283571 | rs770821636        | C      | T | 2  | 1  | 1  | European         | 0.5         | 0.5         |
| ANKRD11 | chr16 | 89283591 | rs754224251        | C      | A | 2  | 0  | 2  | Latin American 2 | 0.5         | 0.5         |
| ANKRD11 | chr16 | 89283596 | rs199903301        | C      | G | 3  | 0  | 3  | European         | 0.666666667 | 0.444444444 |
| ANKRD11 | chr16 | 89283624 | rs769464008        | C      | T | 2  | 0  | 2  | Latin American 2 | 1           | 0           |
| ANKRD11 | chr16 | 89283625 | rs202099475        | G      | A | 10 | 6  | 4  | Latin American 1 | 0.8         | 0.32        |
| ANKRD11 | chr16 | 89283652 | rs375695945        | C      | T | 5  | 2  | 3  | European         | 0.6         | 0.56        |
| ANKRD11 | chr16 | 89283662 | rs201826191        | C      | G | 5  | 4  | 1  | European         | 1           | 0           |
| ANKRD11 | chr16 | 89283697 | rs368593056        | G      | A | 3  | 2  | 1  | African American | 0.333333333 | 0.666666667 |
| ANKRD11 | chr16 | 89283709 | rs201376347        | C      | T | 12 | 2  | 10 | AFR              | 0.75        | 0.402777778 |
| ANKRD11 | chr16 | 89283711 | rs1031755247       | G      | A | 2  | 1  | 1  | Latin American 2 | 0.5         | 0.5         |
| ANKRD11 | chr16 | 89283716 | rs772713030        | TCTC   | T | 4  | 3  | 1  | East Asian       | 0.75        | 0.375       |
| ANKRD11 | chr16 | 89283738 | rs575811373        | G      | A | 2  | 0  | 2  | European         | 0.5         | 0.5         |
| ANKRD11 | chr16 | 89283742 | rs752116186        | G      | A | 2  | 0  | 2  | South Asian      | 1           | 0           |
| ANKRD11 | chr16 | 89283783 | rs773527879        | C      | G | 4  | 2  | 2  | European         | 1           | 0           |
| ANKRD11 | chr16 | 89283835 | rs764784295        | G      | A | 3  | 1  | 2  | African American | 1           | 0           |
| ANKRD11 | chr16 | 89283858 | rs199800166        | C      | T | 22 | 10 | 12 | Latin American 1 | 0.954545455 | 0.08677686  |
| ANKRD11 | chr16 | 89283859 | rs781323579        | G      | A | 3  | 0  | 3  | African American | 0.666666667 | 0.444444444 |
| ANKRD11 | chr16 | 89283864 | rs1298734986       | C      | T | 2  | 1  | 1  | European         | 1           | 0           |
| ANKRD11 | chr16 | 89283874 | rs1357840458       | G      | A | 3  | 0  | 3  | East Asian       | 0.333333333 | 0.666666667 |
| ANKRD11 | chr16 | 89283931 | rs201607978        | C      | T | 2  | 0  | 2  | African American | 0.5         | 0.5         |
| ANKRD11 | chr16 | 89283933 | rs150964764        | C      | T | 7  | 1  | 6  | Latin American 2 | 0.714285714 | 0.448979592 |
| ANKRD11 | chr16 | 89283963 | rs145730800        | G      | A | 5  | 1  | 4  | Latin American 1 | 0.6         | 0.48        |
| ANKRD11 | chr16 | 89284023 | rs149776253        | C      | T | 58 | 13 | 45 | European         | 0.793103448 | 0.35255648  |
| ANKRD11 | chr16 | 89284161 | rs759272573        | A      | G | 2  | 0  | 2  | Latin American 2 | 1           | 0           |
| ANKRD11 | chr16 | 89284170 | rs1423017592       | T      | C | 2  | 1  | 1  | European         | 1           | 0           |
| ANKRD11 | chr16 | 89284183 | rs760426316        | T      | C | 6  | 3  | 3  | East Asian       | 1           | 0           |
| ANKRD11 | chr16 | 89284205 | chr16_89284205_C_A | C      | A | 2  | 2  | 0  | European         | 1           | 0           |

|         |       |          |                    |             |   |     |     |     |                  |             |             |
|---------|-------|----------|--------------------|-------------|---|-----|-----|-----|------------------|-------------|-------------|
| ANKRD11 | chr16 | 89284228 | rs750596755        | G           | A | 3   | 1   | 2   | European         | 0.666666667 | 0.444444444 |
| ANKRD11 | chr16 | 89284233 | rs780182611        | T           | C | 3   | 0   | 3   | South Asian      | 1           | 0           |
| ANKRD11 | chr16 | 89284284 | rs143279397        | G           | A | 4   | 1   | 3   | Latin American 2 | 0.5         | 0.625       |
| ANKRD11 | chr16 | 89284302 | rs138898373        | G           | A | 42  | 11  | 31  | European         | 0.880952381 | 0.216553288 |
| ANKRD11 | chr16 | 89284303 | rs142059753        | A           | G | 2   | 0   | 2   | African American | 0.5         | 0.5         |
| ANKRD11 | chr16 | 89284326 | rs146294483        | G           | A | 10  | 3   | 7   | European         | 0.8         | 0.34        |
| ANKRD11 | chr16 | 89284329 | rs370690185        | C           | T | 6   | 2   | 4   | European         | 1           | 0           |
| ANKRD11 | chr16 | 89284348 | rs377553429        | A           | G | 2   | 1   | 1   | African American | 1           | 0           |
| ANKRD11 | chr16 | 89284358 | rs150810048        | G           | C | 12  | 5   | 7   | Latin American 1 | 0.666666667 | 0.444444444 |
| ANKRD11 | chr16 | 89284379 | rs139134429        | G           | C | 6   | 2   | 4   | Latin American 1 | 0.833333333 | 0.277777778 |
| ANKRD11 | chr16 | 89284418 | chr16_89284418_T_A | T           | A | 2   | 0   | 2   | Latin American 1 | 1           | 0           |
| ANKRD11 | chr16 | 89284455 | rs773188476        | T           | G | 3   | 2   | 1   | European         | 1           | 0           |
| ANKRD11 | chr16 | 89284468 | rs149939914        | C           | T | 2   | 1   | 1   | Latin American 1 | 0.5         | 0.5         |
| ANKRD11 | chr16 | 89284477 | rs1347573248       | G           | C | 2   | 1   | 1   | European         | 1           | 0           |
| ANKRD11 | chr16 | 89284486 | rs759702780        | C           | G | 3   | 0   | 3   | African American | 0.666666667 | 0.444444444 |
| ANKRD11 | chr16 | 89284514 | rs754370770        | A           | C | 2   | 0   | 2   | Latin American 2 | 1           | 0           |
| ANKRD11 | chr16 | 89284572 | rs374714172        | A           | T | 3   | 1   | 2   | European         | 1           | 0           |
| ANKRD11 | chr16 | 89284618 | rs757738828        | CCTT        | C | 2   | 0   | 2   | European         | 0.5         | 0.5         |
| ANKRD11 | chr16 | 89284667 | rs1267173254       | C           | G | 2   | 1   | 1   | European         | 1           | 0           |
| ANKRD11 | chr16 | 89284690 | rs140370885        | C           | T | 31  | 7   | 24  | European         | 0.903225806 | 0.178980229 |
| ANKRD11 | chr16 | 89284698 | rs115797011        | G           | C | 346 | 101 | 245 | African American | 0.60982659  | 0.558087474 |
| ANKRD11 | chr16 | 89284698 | chr16_89284698_G_A | G           | A | 10  | 3   | 7   | European         | 0.7         | 0.46        |
| ANKRD11 | chr16 | 89284699 | rs776780527        | C           | T | 8   | 2   | 6   | Latin American 2 | 0.375       | 0.71875     |
| ANKRD11 | chr16 | 89284716 | rs757383760        | CTCT        | C | 3   | 0   | 3   | European         | 0.666666667 | 0.444444444 |
| ANKRD11 | chr16 | 89284717 | rs141168665        | T           | C | 8   | 3   | 5   | European         | 0.875       | 0.21875     |
| ANKRD11 | chr16 | 89284717 | chr16_89284717_T_G | T           | G | 2   | 0   | 2   | Latin American 1 | 1           | 0           |
| ANKRD11 | chr16 | 89284724 | chr16_89284724_C_A | C           | A | 2   | 0   | 2   | Latin American 1 | 1           | 0           |
| ANKRD11 | chr16 | 89284728 | rs749017226        | G           | A | 3   | 1   | 2   | African American | 0.333333333 | 0.666666667 |
| ANKRD11 | chr16 | 89284740 | rs371119186        | C           | T | 2   | 1   | 1   | European         | 0.5         | 0.5         |
| ANKRD11 | chr16 | 89284746 | rs1305076348       | C           | T | 3   | 1   | 2   | East Asian       | 1           | 0           |
| ANKRD11 | chr16 | 89284779 | rs202142344        | G           | A | 42  | 4   | 38  | Latin American 1 | 1           | 0           |
| ANKRD11 | chr16 | 89284803 | rs558841201        | G           | T | 12  | 0   | 12  | South Asian      | 0.833333333 | 0.291666667 |
| ANKRD11 | chr16 | 89284806 | rs752173892        | T           | C | 3   | 0   | 3   | African American | 0.666666667 | 0.444444444 |
| ANKRD11 | chr16 | 89284807 | rs143817649        | A           | C | 11  | 0   | 11  | South Asian      | 0.909090909 | 0.165289256 |
| ANKRD11 | chr16 | 89284834 | rs747071647        | T           | C | 4   | 2   | 2   | East Asian       | 1           | 0           |
| ANKRD11 | chr16 | 89284875 | rs780150752        | GAAGAAATGGT | G | 4   | 3   | 1   | European         | 1           | 0           |
| ANKRD11 | chr16 | 89284903 | rs1178134024       | G           | A | 11  | 5   | 6   | Latin American 1 | 1           | 0           |
| ANKRD11 | chr16 | 89284919 | rs150236869        | C           | G | 2   | 2   | 0   | African American | 1           | 0           |
| ANKRD11 | chr16 | 89284951 | rs756332789        | C           | T | 2   | 0   | 2   | Latin American 1 | 0.5         | 0.5         |
| ANKRD11 | chr16 | 89284963 | rs752451204        | C           | T | 4   | 0   | 4   | European         | 0.5         | 0.625       |
| ANKRD11 | chr16 | 89284965 | rs374369335        | T           | A | 19  | 6   | 13  | European         | 1           | 0           |
| ANKRD11 | chr16 | 89284981 | rs374072757        | A           | C | 2   | 0   | 2   | East Asian       | 1           | 0           |
| ANKRD11 | chr16 | 89285092 | rs1171733992       | C           | T | 2   | 1   | 1   | MEN              | 0.5         | 0.5         |
| ANKRD11 | chr16 | 89285104 | rs1292885694       | C           | G | 2   | 2   | 0   | African American | 0.5         | 0.5         |
| ANKRD11 | chr16 | 89285112 | rs777270316        | C           | G | 4   | 1   | 3   | Latin American 2 | 1           | 0           |
| ANKRD11 | chr16 | 89285115 | rs141997519        | A           | T | 5   | 2   | 3   | Latin American 1 | 1           | 0           |

|         |       |          |                        |      |           |     |     |     |                  |             |             |
|---------|-------|----------|------------------------|------|-----------|-----|-----|-----|------------------|-------------|-------------|
| ANKRD11 | chr16 | 89285122 | rs370417892            | C    | T         | 2   | 1   | 1   | African American | 0.5         | 0.5         |
| ANKRD11 | chr16 | 89285157 | rs765490326            | G    | C         | 6   | 1   | 5   | European         | 0.666666667 | 0.5         |
| ANKRD11 | chr16 | 89285169 | rs778960311            | C    | T         | 6   | 0   | 6   | Latin American 1 | 0.666666667 | 0.5         |
| ANKRD11 | chr16 | 89285182 | rs149569330            | C    | T         | 5   | 3   | 2   | European         | 0.6         | 0.56        |
| ANKRD11 | chr16 | 89285183 | rs768891680            | TTTA | T         | 2   | 0   | 2   | South Asian      | 1           | 0           |
| ANKRD11 | chr16 | 89285208 | rs536676415            | G    | T         | 2   | 0   | 2   | South Asian      | 1           | 0           |
| ANKRD11 | chr16 | 89285244 | rs1048440933           | A    | C         | 305 | 145 | 160 | European         | 0.937704918 | 0.119688256 |
| ANKRD11 | chr16 | 89285247 | rs148472572            | G    | A         | 2   | 1   | 1   | European         | 0.5         | 0.5         |
| ANKRD11 | chr16 | 89285247 | chr16_89285247_G_C     | G    | C         | 3   | 0   | 3   | South Asian      | 1           | 0           |
| ANKRD11 | chr16 | 89285251 | chr16_89285251_G_A     | G    | A         | 2   | 0   | 2   | Latin American 1 | 1           | 0           |
| ANKRD11 | chr16 | 89285251 | chr16_89285251_G_GCCGT | G    | GCCGTCTTC | 4   | 1   | 3   | European         | 1           | 0           |
| ANKRD11 | chr16 | 89285256 | rs370109948            | G    | A         | 6   | 2   | 4   | Latin American 1 | 0.833333333 | 0.277777778 |
| ANKRD11 | chr16 | 89285277 | rs1233558713           | G    | T         | 2   | 1   | 1   | European         | 1           | 0           |
| ANKRD11 | chr16 | 89285284 | rs147180412            | C    | T         | 16  | 4   | 12  | African American | 0.4375      | 0.6796875   |
| ANKRD11 | chr16 | 89285295 | rs773132293            | G    | A         | 12  | 4   | 8   | Latin American 1 | 1           | 0           |
| ANKRD11 | chr16 | 89285296 | rs200886155            | C    | T         | 3   | 2   | 1   | Latin American 2 | 0.666666667 | 0.444444444 |
| ANKRD11 | chr16 | 89285355 | rs145699896            | G    | A         | 2   | 0   | 2   | South Asian      | 1           | 0           |
| ANKRD11 | chr16 | 89285366 | rs1367492419           | AGTG | A         | 2   | 0   | 2   | Latin American 1 | 1           | 0           |
| ANKRD11 | chr16 | 89285395 | rs371142732            | T    | C         | 7   | 1   | 6   | African American | 0.285714286 | 0.734693878 |
| ANKRD11 | chr16 | 89285409 | rs202203523            | T    | C         | 15  | 2   | 13  | European         | 0.666666667 | 0.524444444 |
| ANKRD11 | chr16 | 89285418 | rs559672667            | G    | A         | 13  | 2   | 11  | Latin American 1 | 0.692307692 | 0.473372781 |
| ANKRD11 | chr16 | 89285482 | rs1169051044           | C    | T         | 2   | 0   | 2   | European         | 1           | 0           |
| ANKRD11 | chr16 | 89285515 | rs147744268            | C    | T         | 48  | 17  | 31  | African American | 0.520833333 | 0.553819444 |
| ANKRD11 | chr16 | 89285629 | rs138353708            | C    | T         | 2   | 0   | 2   | African American | 0.5         | 0.5         |
| ANKRD11 | chr16 | 89286041 | rs140998225            | G    | A         | 163 | 56  | 107 | European         | 0.435582822 | 0.638789567 |
| ANKRD11 | chr16 | 89286063 | rs776494318            | T    | C         | 4   | 2   | 2   | European         | 0.5         | 0.625       |
| ANKRD11 | chr16 | 89286093 | rs199778705            | C    | A         | 16  | 5   | 11  | European         | 0.75        | 0.375       |
| ANKRD11 | chr16 | 89286098 | rs751642003            | G    | A         | 17  | 7   | 10  | Latin American 1 | 0.941176471 | 0.110726644 |
| ANKRD11 | chr16 | 89286107 | rs138723232            | T    | C         | 9   | 2   | 7   | Latin American 1 | 0.444444444 | 0.666666667 |
| ANKRD11 | chr16 | 89286168 | rs762710349            | G    | A         | 2   | 0   | 2   | Latin American 2 | 0.5         | 0.5         |
| ANKRD11 | chr16 | 89290646 | rs374133199            | C    | T         | 2   | 0   | 2   | Latin American 2 | 0.5         | 0.5         |
| ANKRD11 | chr16 | 89290685 | rs777123332            | C    | T         | 2   | 1   | 1   | European         | 0.5         | 0.5         |
| ANKRD11 | chr16 | 89290768 | rs780204136            | G    | C         | 6   | 1   | 5   | Latin American 2 | 0.5         | 0.5         |
| ANKRD11 | chr16 | 89290777 | rs777070083            | G    | A         | 2   | 2   | 0   | European         | 1           | 0           |
| ANKRD11 | chr16 | 89291084 | rs778287566            | T    | C         | 2   | 1   | 1   | European         | 1           | 0           |
| ANKRD11 | chr16 | 89291130 | rs190143218            | C    | G         | 22  | 10  | 12  | East Asian       | 0.909090909 | 0.165289256 |
| ANKRD11 | chr16 | 89291135 | rs143894223            | C    | T         | 10  | 3   | 7   | European         | 1           | 0           |
| ANKRD11 | chr16 | 89291136 | rs1482187297           | G    | A         | 2   | 0   | 2   | European         | 1           | 0           |
| ANKRD11 | chr16 | 89305242 | rs758197438            | C    | T         | 3   | 3   | 0   | East Asian       | 0.666666667 | 0.444444444 |
| ANKRD11 | chr16 | 89305296 | rs144947610            | C    | T         | 23  | 7   | 16  | African American | 0.565217391 | 0.570888469 |
| ANKRD11 | chr16 | 89305316 | rs149152296            | G    | A         | 6   | 5   | 1   | European         | 1           | 0           |
| PRPSAP2 | chr17 | 18858267 | rs1027093192           | C    | T         | 8   | 4   | 4   | European         | 0.625       | 0.46875     |
| PRPSAP2 | chr17 | 18858268 | rs1002122928           | G    | T         | 3   | 2   | 1   | European         | 0.666666667 | 0.444444444 |
| PRPSAP2 | chr17 | 18865455 | rs951777470            | G    | A         | 11  | 1   | 10  | Latin American 2 | 0.909090909 | 0.165289256 |
| PRPSAP2 | chr17 | 18865794 | rs200374403            | C    | T         | 5   | 3   | 2   | East Asian       | 1           | 0           |
| PRPSAP2 | chr17 | 18867283 | chr17_18867283_C_A     | C    | A         | 2   | 0   | 2   | South Asian      | 1           | 0           |

|         |       |          |                    |   |   |     |     |     |                  |             |             |
|---------|-------|----------|--------------------|---|---|-----|-----|-----|------------------|-------------|-------------|
| PRPSAP2 | chr17 | 18872570 | rs759641444        | C | T | 15  | 1   | 14  | Latin American 2 | 0.866666667 | 0.231111111 |
| PRPSAP2 | chr17 | 18872647 | rs149614767        | G | A | 74  | 28  | 46  | European         | 1           | 0           |
| PRPSAP2 | chr17 | 18877683 | rs375670818        | G | T | 2   | 1   | 1   | European         | 1           | 0           |
| PRPSAP2 | chr17 | 18877686 | rs1024134091       | T | C | 2   | 0   | 2   | European         | 1           | 0           |
| PRPSAP2 | chr17 | 18877877 | rs773909599        | A | G | 4   | 0   | 4   | South Asian      | 1           | 0           |
| PRPSAP2 | chr17 | 18877878 | rs138257603        | T | C | 23  | 9   | 14  | African American | 0.695652174 | 0.461247637 |
| PRPSAP2 | chr17 | 18882570 | rs80293494         | C | T | 591 | 168 | 423 | African American | 0.536379019 | 0.611828299 |
| PRPSAP2 | chr17 | 18923904 | rs568479364        | T | A | 20  | 7   | 13  | European         | 0.7         | 0.475       |
| PRPSAP2 | chr17 | 18930524 | rs754325362        | T | C | 3   | 0   | 3   | European         | 1           | 0           |
| PRPSAP2 | chr17 | 18930526 | rs1218554127       | C | T | 7   | 0   | 7   | European         | 0.857142857 | 0.244897959 |
| PRPSAP2 | chr17 | 18930526 | chr17_18930526_C_A | C | A | 258 | 39  | 219 | European         | 0.73255814  | 0.442130882 |
| PRPSAP2 | chr17 | 18930526 | chr17_18930526_C_G | C | G | 36  | 1   | 35  | European         | 0.777777778 | 0.38117284  |
| PRPSAP2 | chr17 | 18930531 | rs1235575326       | G | T | 480 | 58  | 422 | European         | 0.720833333 | 0.456032986 |
| PRPSAP2 | chr17 | 18930532 | chr17_18930532_C_G | C | G | 40  | 2   | 38  | European         | 0.8         | 0.34125     |
| PRPSAP2 | chr17 | 18930535 | chr17_18930535_C_A | C | A | 9   | 1   | 8   | European         | 0.888888889 | 0.197530864 |
| KRT23   | chr17 | 40923077 | rs747434633        | G | C | 2   | 2   | 0   | European         | 1           | 0           |
| KRT23   | chr17 | 40923080 | rs17856805         | G | T | 2   | 2   | 0   | European         | 1           | 0           |
| KRT23   | chr17 | 40924483 | rs773193282        | G | A | 2   | 0   | 2   | European         | 0.5         | 0.5         |
| KRT23   | chr17 | 40924498 | rs201362244        | C | T | 2   | 1   | 1   | European         | 1           | 0           |
| KRT23   | chr17 | 40924499 | rs570247559        | G | A | 5   | 3   | 2   | European         | 0.4         | 0.72        |
| KRT23   | chr17 | 40925362 | rs141079166        | C | G | 50  | 7   | 43  | South Asian      | 0.58        | 0.5752      |
| KRT23   | chr17 | 40925378 | rs370019396        | C | T | 5   | 2   | 3   | European         | 0.6         | 0.56        |
| KRT23   | chr17 | 40925379 | rs575192650        | G | A | 7   | 1   | 6   | South Asian      | 0.571428571 | 0.612244898 |
| KRT23   | chr17 | 40925381 | rs575665618        | C | T | 2   | 1   | 1   | European         | 1           | 0           |
| KRT23   | chr17 | 40925384 | rs779534374        | T | C | 4   | 3   | 1   | African American | 1           | 0           |
| KRT23   | chr17 | 40925387 | rs115317761        | G | A | 67  | 20  | 47  | African American | 0.626865672 | 0.530184896 |
| KRT23   | chr17 | 40925415 | rs770614314        | T | C | 2   | 0   | 2   | European         | 1           | 0           |
| KRT23   | chr17 | 40925443 | chr17_40925443_G_T | G | T | 2   | 0   | 2   | Latin American 1 | 1           | 0           |
| KRT23   | chr17 | 40925450 | rs200066086        | C | T | 2   | 0   | 2   | East Asian       | 1           | 0           |
| KRT23   | chr17 | 40925454 | chr17_40925454_C_G | C | G | 3   | 1   | 2   | African American | 1           | 0           |
| KRT23   | chr17 | 40925465 | rs574631428        | C | T | 7   | 1   | 6   | European         | 0.857142857 | 0.244897959 |
| KRT23   | chr17 | 40925474 | rs141349810        | G | A | 2   | 1   | 1   | European         | 0.5         | 0.5         |
| KRT23   | chr17 | 40925478 | chr17_40925478_G_C | G | C | 5   | 0   | 5   | Latin American 2 | 0.6         | 0.48        |
| KRT23   | chr17 | 40925528 | rs147078850        | G | A | 9   | 5   | 4   | European         | 1           | 0           |
| KRT23   | chr17 | 40925534 | rs771092085        | C | T | 7   | 0   | 7   | South Asian      | 0.857142857 | 0.244897959 |
| KRT23   | chr17 | 40925535 | rs377660950        | G | A | 6   | 3   | 3   | African American | 0.833333333 | 0.277777778 |
| KRT23   | chr17 | 40925547 | rs138481901        | C | T | 15  | 5   | 10  | European         | 1           | 0           |
| KRT23   | chr17 | 40925556 | chr17_40925556_T_C | T | C | 2   | 0   | 2   | African American | 0.5         | 0.5         |
| KRT23   | chr17 | 40925562 | rs147325821        | C | G | 11  | 2   | 9   | Latin American 1 | 0.727272727 | 0.429752066 |
| KRT23   | chr17 | 40928239 | rs35937181         | G | A | 253 | 62  | 191 | African American | 0.581027668 | 0.583855395 |
| KRT23   | chr17 | 40928247 | rs561067179        | C | G | 2   | 0   | 2   | South Asian      | 1           | 0           |
| KRT23   | chr17 | 40928263 | chr17_40928263_A_T | A | T | 3   | 2   | 1   | Latin American 1 | 1           | 0           |
| KRT23   | chr17 | 40928284 | rs115236336        | C | T | 31  | 13  | 18  | African American | 0.483870968 | 0.647242456 |
| KRT23   | chr17 | 40928285 | rs371648763        | G | A | 7   | 1   | 6   | Latin American 2 | 0.428571429 | 0.693877551 |
| KRT23   | chr17 | 40928321 | chr17_40928321_C_T | C | T | 3   | 1   | 2   | East Asian       | 1           | 0           |
| KRT23   | chr17 | 40928474 | rs541449842        | C | T | 4   | 0   | 4   | South Asian      | 1           | 0           |

|        |       |          |                    |   |   |     |     |     |                  |             |             |
|--------|-------|----------|--------------------|---|---|-----|-----|-----|------------------|-------------|-------------|
| KRT23  | chr17 | 40928552 | rs201505756        | G | A | 2   | 1   | 1   | Latin American 1 | 0.5         | 0.5         |
| KRT23  | chr17 | 40928554 | rs188613400        | A | T | 3   | 2   | 1   | African American | 0.666666667 | 0.444444444 |
| KRT23  | chr17 | 40928573 | rs181367091        | T | C | 3   | 0   | 3   | South Asian      | 1           | 0           |
| KRT23  | chr17 | 40928588 | rs371102975        | A | T | 3   | 2   | 1   | European         | 1           | 0           |
| KRT23  | chr17 | 40929977 | rs140407470        | C | T | 20  | 6   | 14  | African American | 0.75        | 0.375       |
| KRT23  | chr17 | 40930050 | rs1354811042       | C | T | 3   | 1   | 2   | Latin American 1 | 1           | 0           |
| KRT23  | chr17 | 40931400 | chr17_40931400_C_T | C | T | 2   | 0   | 2   | Latin American 1 | 1           | 0           |
| KRT23  | chr17 | 40931433 | rs149764180        | T | C | 4   | 1   | 3   | European         | 1           | 0           |
| KRT23  | chr17 | 40931440 | rs145716105        | T | A | 3   | 0   | 3   | European         | 0.666666667 | 0.444444444 |
| KRT23  | chr17 | 40931454 | rs1342737717       | A | C | 3   | 1   | 2   | Latin American 1 | 0.666666667 | 0.444444444 |
| KRT23  | chr17 | 40936213 | rs897151182        | C | T | 25  | 9   | 16  | Latin American 1 | 0.96        | 0.0768      |
| KRT23  | chr17 | 40936312 | rs761573793        | T | G | 3   | 0   | 3   | South Asian      | 1           | 0           |
| KRT23  | chr17 | 40936332 | rs148131200        | C | T | 33  | 8   | 25  | European         | 0.696969697 | 0.475665748 |
| KRT23  | chr17 | 40936333 | rs373501029        | G | A | 2   | 0   | 2   | Latin American 2 | 1           | 0           |
| KRT23  | chr17 | 40936344 | rs771311454        | A | G | 2   | 1   | 1   | European         | 1           | 0           |
| KRT23  | chr17 | 40936366 | chr17_40936366_T_G | T | G | 345 | 55  | 290 | European         | 0.582608696 | 0.608561227 |
| KRT23  | chr17 | 40936378 | rs767175557        | T | G | 2   | 0   | 2   | African American | 0.5         | 0.5         |
| KRT23  | chr17 | 40936401 | rs1312086692       | A | G | 5   | 2   | 3   | Latin American 2 | 0.6         | 0.56        |
| KRT23  | chr17 | 40936401 | chr17_40936401_A_C | A | C | 2   | 1   | 1   | European         | 1           | 0           |
| KRT23  | chr17 | 40936435 | rs200948461        | C | T | 3   | 1   | 2   | European         | 0.666666667 | 0.444444444 |
| KRT23  | chr17 | 40936437 | rs200635872        | C | T | 7   | 1   | 6   | Latin American 1 | 0.714285714 | 0.408163265 |
| KRT23  | chr17 | 40936440 | chr17_40936440_G_C | G | C | 2   | 0   | 2   | European         | 1           | 0           |
| KRT23  | chr17 | 40936449 | rs759203930        | C | T | 2   | 0   | 2   | Latin American 2 | 1           | 0           |
| KRT23  | chr17 | 40936455 | rs148371500        | C | A | 5   | 0   | 5   | European         | 0.8         | 0.32        |
| KRT23  | chr17 | 40936489 | rs139361222        | C | A | 472 | 138 | 334 | African American | 0.580508475 | 0.577213804 |
| KRT23  | chr17 | 40936489 | chr17_40936489_C_T | C | T | 16  | 6   | 10  | European         | 0.6875      | 0.4609375   |
| KRT23  | chr17 | 40936495 | rs759379498        | C | T | 5   | 2   | 3   | East Asian       | 0.8         | 0.32        |
| KRT23  | chr17 | 40936516 | rs747598293        | T | C | 16  | 7   | 9   | European         | 0.4375      | 0.6328125   |
| KRT23  | chr17 | 40936533 | rs376457106        | C | T | 7   | 0   | 7   | African American | 0.857142857 | 0.244897959 |
| KRT23  | chr17 | 40936546 | rs748489262        | C | T | 2   | 1   | 1   | African American | 1           | 0           |
| KRT23  | chr17 | 40936556 | rs202197762        | A | C | 15  | 4   | 11  | East Asian       | 0.866666667 | 0.231111111 |
| SMURF2 | chr17 | 64545942 | rs559722942        | T | C | 5   | 0   | 5   | South Asian      | 1           | 0           |
| SMURF2 | chr17 | 64547671 | chr17_64547671_C_T | C | T | 2   | 0   | 2   | Latin American 2 | 0.5         | 0.5         |
| SMURF2 | chr17 | 64547746 | rs782062513        | C | T | 2   | 0   | 2   | East Asian       | 0.5         | 0.5         |
| SMURF2 | chr17 | 64547747 | rs201657151        | G | A | 4   | 0   | 4   | European         | 0.5         | 0.625       |
| SMURF2 | chr17 | 64551607 | rs528473359        | T | C | 10  | 1   | 9   | South Asian      | 1           | 0           |
| SMURF2 | chr17 | 64554953 | chr17_64554953_C_T | C | T | 2   | 0   | 2   | Latin American 1 | 1           | 0           |
| SMURF2 | chr17 | 64554961 | rs370520140        | G | A | 4   | 1   | 3   | European         | 1           | 0           |
| SMURF2 | chr17 | 64555836 | chr17_64555836_T_C | T | C | 2   | 0   | 2   | Latin American 2 | 1           | 0           |
| SMURF2 | chr17 | 64555938 | rs1250971827       | G | T | 12  | 4   | 8   | Latin American 1 | 0.916666667 | 0.152777778 |
| SMURF2 | chr17 | 64555950 | rs782497053        | C | T | 2   | 0   | 2   | East Asian       | 1           | 0           |
| SMURF2 | chr17 | 64561536 | chr17_64561536_C_A | C | A | 2   | 0   | 2   | Latin American 1 | 0.5         | 0.5         |
| SMURF2 | chr17 | 64561588 | rs782492471        | C | A | 7   | 0   | 7   | Latin American 2 | 0.857142857 | 0.244897959 |
| SMURF2 | chr17 | 64561602 | rs782498467        | T | C | 3   | 3   | 0   | European         | 1           | 0           |
| SMURF2 | chr17 | 64562803 | rs142473670        | G | A | 10  | 2   | 8   | European         | 0.8         | 0.34        |
| SMURF2 | chr17 | 64562866 | chr17_64562866_C_T | C | T | 2   | 1   | 1   | Native American  | 1           | 0           |

|        |       |          |                    |   |   |     |     |     |                  |             |             |
|--------|-------|----------|--------------------|---|---|-----|-----|-----|------------------|-------------|-------------|
| SMURF2 | chr17 | 64562905 | rs1339401322       | T | G | 2   | 1   | 1   | European         | 1           | 0           |
| SMURF2 | chr17 | 64562964 | rs782096701        | C | T | 4   | 3   | 1   | East Asian       | 1           | 0           |
| SMURF2 | chr17 | 64562965 | rs782244329        | G | A | 4   | 1   | 3   | European         | 0.25        | 0.75        |
| SMURF2 | chr17 | 64571939 | rs143629300        | T | C | 25  | 7   | 18  | East Asian       | 0.8         | 0.3424      |
| SMURF2 | chr17 | 64571940 | rs144648010        | T | C | 10  | 4   | 6   | Latin American 1 | 0.6         | 0.54        |
| SMURF2 | chr17 | 64578511 | rs782055302        | G | A | 2   | 1   | 1   | African American | 0.5         | 0.5         |
| SMURF2 | chr17 | 64580813 | rs782789235        | G | T | 2   | 2   | 0   | European         | 0.5         | 0.5         |
| SMURF2 | chr17 | 64580909 | rs535944315        | C | T | 3   | 0   | 3   | South Asian      | 1           | 0           |
| SMURF2 | chr17 | 64580917 | rs1225064858       | G | T | 3   | 0   | 3   | African American | 1           | 0           |
| SMURF2 | chr17 | 64580981 | rs557992978        | C | T | 2   | 0   | 2   | European         | 0.5         | 0.5         |
| SMURF2 | chr17 | 64583461 | rs1397410994       | C | T | 2   | 0   | 2   | European         | 1           | 0           |
| SMURF2 | chr17 | 64583525 | rs141070223        | C | T | 6   | 2   | 4   | European         | 0.833333333 | 0.277777778 |
| SMURF2 | chr17 | 64586087 | chr17_64586087_C_G | C | G | 6   | 1   | 5   | European         | 0.5         | 0.611111111 |
| SMURF2 | chr17 | 64586093 | chr17_64586093_G_T | G | T | 330 | 66  | 264 | European         | 0.566666667 | 0.62775023  |
| SMURF2 | chr17 | 64586099 | chr17_64586099_C_G | C | G | 6   | 2   | 4   | African American | 0.333333333 | 0.722222222 |
| SMURF2 | chr17 | 64586100 | chr17_64586100_G_T | G | T | 387 | 58  | 329 | European         | 0.573643411 | 0.604864825 |
| SMURF2 | chr17 | 64586105 | chr17_64586105_C_A | C | A | 586 | 155 | 431 | European         | 0.5221843   | 0.663857471 |
| SMURF2 | chr17 | 64586143 | rs782166497        | C | T | 4   | 3   | 1   | East Asian       | 1           | 0           |
| SMURF2 | chr17 | 64586147 | rs145845053        | T | C | 41  | 12  | 29  | Latin American 1 | 0.536585366 | 0.600832838 |
| SMURF2 | chr17 | 64591149 | rs373932060        | T | A | 2   | 1   | 1   | European         | 1           | 0           |
| SMURF2 | chr17 | 64593457 | rs781849582        | C | T | 2   | 1   | 1   | East Asian       | 0.5         | 0.5         |
| SMURF2 | chr17 | 64593475 | rs1180983372       | A | T | 7   | 5   | 2   | Latin American 1 | 1           | 0           |
| SMURF2 | chr17 | 64661852 | rs866321574        | C | T | 101 | 41  | 60  | European         | 0.574257426 | 0.622684051 |
| NPTX1  | chr17 | 80470826 | rs754698619        | C | T | 4   | 0   | 4   | African American | 0.5         | 0.625       |
| NPTX1  | chr17 | 80470872 | rs201425153        | T | C | 34  | 13  | 21  | East Asian       | 1           | 0           |
| NPTX1  | chr17 | 80470877 | rs201679806        | G | T | 24  | 11  | 13  | East Asian       | 0.958333333 | 0.079861111 |
| NPTX1  | chr17 | 80470890 | rs752243454        | C | T | 2   | 0   | 2   | East Asian       | 0.5         | 0.5         |
| NPTX1  | chr17 | 80470914 | rs139409827        | T | C | 41  | 16  | 25  | European         | 0.853658537 | 0.262938727 |
| NPTX1  | chr17 | 80470947 | rs1466750124       | C | T | 2   | 0   | 2   | European         | 1           | 0           |
| NPTX1  | chr17 | 80470950 | rs73432807         | G | A | 494 | 154 | 340 | African American | 0.467611336 | 0.595436739 |
| NPTX1  | chr17 | 80470950 | chr17_80470950_G_C | G | C | 2   | 1   | 1   | European         | 1           | 0           |
| NPTX1  | chr17 | 80470961 | rs375690569        | C | T | 3   | 2   | 1   | European         | 1           | 0           |
| NPTX1  | chr17 | 80471755 | rs377120879        | C | T | 2   | 0   | 2   | Latin American 2 | 0.5         | 0.5         |
| NPTX1  | chr17 | 80471811 | rs1356334012       | G | A | 5   | 1   | 4   | European         | 0.8         | 0.32        |
| NPTX1  | chr17 | 80473250 | rs140465326        | C | G | 3   | 1   | 2   | European         | 1           | 0           |
| NPTX1  | chr17 | 80473393 | rs371475961        | C | T | 2   | 1   | 1   | European         | 1           | 0           |
| NPTX1  | chr17 | 80473429 | rs199995922        | C | T | 7   | 3   | 4   | European         | 0.571428571 | 0.571428571 |
| NPTX1  | chr17 | 80475536 | rs1190514189       | G | C | 7   | 6   | 1   | Latin American 1 | 1           | 0           |
| NPTX1  | chr17 | 80475570 | rs1205267788       | C | T | 27  | 10  | 17  | Latin American 1 | 0.962962963 | 0.07133059  |
| NPTX1  | chr17 | 80475594 | rs143382901        | C | A | 12  | 2   | 10  | African American | 0.583333333 | 0.486111111 |
| NPTX1  | chr17 | 80475612 | rs202053640        | A | G | 5   | 1   | 4   | Latin American 2 | 1           | 0           |
| NPTX1  | chr17 | 80475633 | rs75699547         | A | C | 72  | 2   | 70  | European         | 1           | 0           |
| NPTX1  | chr17 | 80475684 | rs762970588        | T | C | 4   | 0   | 4   | European         | 0.5         | 0.5         |
| NPTX1  | chr17 | 80475708 | rs147136278        | C | A | 2   | 1   | 1   | European         | 1           | 0           |
| NPTX1  | chr17 | 80476022 | rs373040407        | G | C | 2   | 1   | 1   | European         | 1           | 0           |
| NPTX1  | chr17 | 80476050 | rs376278711        | G | C | 2   | 0   | 2   | European         | 1           | 0           |

|        |       |          |                    |   |   |     |     |     |                  |             |             |
|--------|-------|----------|--------------------|---|---|-----|-----|-----|------------------|-------------|-------------|
| NPTX1  | chr17 | 80476085 | rs1314040773       | A | G | 3   | 2   | 1   | East Asian       | 1           | 0           |
| NPTX1  | chr17 | 80476109 | rs775120856        | G | A | 2   | 1   | 1   | Latin American 2 | 1           | 0           |
| NPTX1  | chr17 | 80476133 | rs756426058        | C | G | 9   | 5   | 4   | European         | 1           | 0           |
| NPTX1  | chr17 | 80476142 | rs202234399        | G | C | 55  | 20  | 35  | African American | 0.727272727 | 0.413884298 |
| NPTX1  | chr17 | 80476158 | rs780891833        | G | A | 2   | 2   | 0   | European         | 1           | 0           |
| NPTX1  | chr17 | 80476164 | rs371219313        | G | C | 2   | 1   | 1   | European         | 1           | 0           |
| NPTX1  | chr17 | 80476210 | rs374235361        | G | C | 15  | 4   | 11  | European         | 0.8         | 0.32        |
| NPTX1  | chr17 | 80476374 | rs201884300        | A | T | 27  | 11  | 16  | East Asian       | 0.962962963 | 0.07133059  |
| NPTX1  | chr17 | 80476436 | rs1158112521       | C | T | 25  | 2   | 23  | Latin American 1 | 1           | 0           |
| NPTX1  | chr17 | 80476440 | chr17_80476440_C_T | C | T | 2   | 0   | 2   | European         | 1           | 0           |
| METRNL | chr17 | 83079832 | rs1273070881       | G | A | 2   | 0   | 2   | African American | 0.5         | 0.5         |
| METRNL | chr17 | 83079840 | rs1239074924       | T | G | 36  | 8   | 28  | European         | 0.555555556 | 0.574074074 |
| METRNL | chr17 | 83079850 | rs1444254468       | C | G | 2   | 0   | 2   | African American | 0.5         | 0.5         |
| METRNL | chr17 | 83079856 | chr17_83079856_A_C | A | C | 42  | 3   | 39  | Latin American 1 | 0.5         | 0.617913832 |
| METRNL | chr17 | 83079859 | rs1269326898       | C | A | 3   | 1   | 2   | African American | 1           | 0           |
| METRNL | chr17 | 83079861 | chr17_83079861_T_G | T | G | 344 | 47  | 297 | European         | 0.494186047 | 0.66431179  |
| METRNL | chr17 | 83079864 | rs939037769        | C | G | 304 | 79  | 225 | African American | 0.539473684 | 0.601692348 |
| METRNL | chr17 | 83079892 | chr17_83079892_C_T | C | T | 6   | 3   | 3   | Latin American 1 | 1           | 0           |
| METRNL | chr17 | 83079894 | rs1028679254       | C | T | 3   | 1   | 2   | European         | 1           | 0           |
| METRNL | chr17 | 83079898 | rs771874865        | C | T | 8   | 2   | 6   | Latin American 2 | 0.875       | 0.21875     |
| METRNL | chr17 | 83079943 | rs760414473        | C | A | 8   | 2   | 6   | Latin American 2 | 0.875       | 0.21875     |
| METRNL | chr17 | 83084946 | rs370020717        | C | T | 13  | 3   | 10  | Latin American 1 | 0.384615385 | 0.74556213  |
| METRNL | chr17 | 83084951 | rs762898819        | G | A | 2   | 0   | 2   | European         | 1           | 0           |
| METRNL | chr17 | 83084994 | rs575275512        | C | T | 3   | 2   | 1   | European         | 0.666666667 | 0.444444444 |
| METRNL | chr17 | 83084996 | rs1454900023       | G | T | 2   | 2   | 0   | European         | 1           | 0           |
| METRNL | chr17 | 83084997 | rs904472135        | C | T | 2   | 1   | 1   | Latin American 1 | 0.5         | 0.5         |
| METRNL | chr17 | 83085005 | rs746586593        | G | A | 2   | 0   | 2   | European         | 1           | 0           |
| METRNL | chr17 | 83085047 | rs201383910        | C | T | 2   | 2   | 0   | European         | 0.5         | 0.5         |
| METRNL | chr17 | 83085048 | rs370479031        | G | A | 2   | 1   | 1   | European         | 0.5         | 0.5         |
| METRNL | chr17 | 83085057 | rs762026928        | C | T | 2   | 0   | 2   | Native American  | 1           | 0           |
| METRNL | chr17 | 83085083 | rs777441369        | G | A | 9   | 1   | 8   | Latin American 2 | 0.555555556 | 0.617283951 |
| METRNL | chr17 | 83085111 | rs201337303        | C | T | 18  | 5   | 13  | European         | 0.666666667 | 0.518518519 |
| METRNL | chr17 | 83085167 | rs751240756        | G | A | 2   | 1   | 1   | African American | 0.5         | 0.5         |
| METRNL | chr17 | 83085192 | rs75438321         | A | G | 685 | 211 | 474 | African American | 0.468613139 | 0.623922425 |
| METRNL | chr17 | 83085237 | rs144099835        | C | T | 3   | 1   | 2   | European         | 0.666666667 | 0.444444444 |
| METRNL | chr17 | 83085254 | rs1362802945       | C | T | 2   | 1   | 1   | Latin American 2 | 1           | 0           |
| METRNL | chr17 | 83085278 | rs770942902        | G | A | 2   | 0   | 2   | European         | 1           | 0           |
| METRNL | chr17 | 83085303 | rs910709517        | C | T | 11  | 3   | 8   | European         | 0.818181818 | 0.314049587 |
| METRNL | chr17 | 83085313 | rs554168103        | C | G | 13  | 2   | 11  | Latin American 2 | 0.692307692 | 0.426035503 |
| METRNL | chr17 | 83085314 | rs765812124        | G | A | 3   | 0   | 3   | Latin American 2 | 0.333333333 | 0.666666667 |
| METRNL | chr17 | 83093167 | rs376933401        | C | T | 23  | 6   | 17  | South Asian      | 0.47826087  | 0.688090737 |
| METRNL | chr17 | 83093170 | rs146370282        | C | T | 5   | 2   | 3   | European         | 1           | 0           |
| METRNL | chr17 | 83093193 | rs1391084531       | G | A | 2   | 1   | 1   | AFR              | 0.5         | 0.5         |
| METRNL | chr17 | 83093195 | rs182118556        | G | T | 5   | 0   | 5   | East Asian       | 1           | 0           |
| METRNL | chr17 | 83093208 | rs145406727        | G | A | 10  | 2   | 8   | European         | 0.8         | 0.34        |
| METRNL | chr17 | 83093226 | rs947951011        | G | A | 2   | 1   | 1   | European         | 1           | 0           |

|        |       |          |                        |                   |        |     |     |     |                  |             |             |
|--------|-------|----------|------------------------|-------------------|--------|-----|-----|-----|------------------|-------------|-------------|
| METRNL | chr17 | 83094258 | rs747441581            | G                 | A      | 3   | 2   | 1   | European         | 1           | 0           |
| METRNL | chr17 | 83094262 | rs755795037            | G                 | A      | 2   | 1   | 1   | African American | 0.5         | 0.5         |
| METRNL | chr17 | 83094294 | rs147805686            | G                 | C      | 3   | 2   | 1   | European         | 1           | 0           |
| METRNL | chr17 | 83094297 | rs760504714            | C                 | T      | 3   | 0   | 3   | European         | 0.666666667 | 0.444444444 |
| METRNL | chr17 | 83094322 | rs199638541            | G                 | A      | 7   | 0   | 7   | European         | 1           | 0           |
| METRNL | chr17 | 83094360 | rs150716802            | G                 | A      | 25  | 6   | 19  | European         | 0.92        | 0.1504      |
| METRNL | chr17 | 83094364 | rs147617313            | C                 | T      | 25  | 11  | 14  | European         | 0.6         | 0.5824      |
| METRNL | chr17 | 83094385 | rs142120953            | A                 | G      | 524 | 191 | 333 | European         | 0.795801527 | 0.353140843 |
| METRNL | chr17 | 83094396 | rs752145587            | C                 | T      | 8   | 2   | 6   | Latin American 1 | 0.75        | 0.375       |
| METRNL | chr17 | 83094397 | rs150178990            | G                 | A      | 14  | 4   | 10  | European         | 0.571428571 | 0.62244898  |
| METRNL | chr17 | 83094423 | rs770115888            | G                 | A      | 4   | 0   | 4   | European         | 0.5         | 0.625       |
| METRNL | chr17 | 83094426 | rs775875720            | C                 | T      | 5   | 1   | 4   | African American | 0.8         | 0.32        |
| METRNL | chr17 | 83094430 | rs374765087            | C                 | T      | 5   | 1   | 4   | Latin American 1 | 0.8         | 0.32        |
| METRNL | chr17 | 83094470 | chr17_83094470_C_G     | C                 | G      | 2   | 1   | 1   | European         | 1           | 0           |
| METRNL | chr17 | 83094517 | rs138638098            | G                 | A      | 33  | 12  | 21  | African American | 0.696969697 | 0.451790634 |
| METRNL | chr17 | 83094558 | rs149571038            | G                 | A      | 2   | 1   | 1   | European         | 1           | 0           |
| METRNL | chr17 | 83094568 | rs1263135018           | C                 | T      | 3   | 1   | 2   | European         | 0.666666667 | 0.444444444 |
| ZBTB14 | chr18 | 5292202  | rs760397790            | C                 | T      | 7   | 5   | 2   | East Asian       | 1           | 0           |
| ZBTB14 | chr18 | 5293240  | rs776541423            | T                 | C      | 3   | 0   | 3   | Native American  | 0.666666667 | 0.444444444 |
| ZBTB14 | chr18 | 5293327  | rs1332597525           | C                 | A      | 2   | 1   | 1   | European         | 1           | 0           |
| ZBTB14 | chr18 | 5293335  | rs550862320            | G                 | A      | 4   | 2   | 2   | European         | 0.5         | 0.5         |
| ZBTB14 | chr18 | 5293336  | chr18_5293336_G_A      | G                 | A      | 5   | 0   | 5   | South Asian      | 0.8         | 0.32        |
| ZBTB14 | chr18 | 5293971  | rs964918655            | C                 | A      | 4   | 2   | 2   | European         | 1           | 0           |
| ZBTB14 | chr18 | 5293973  | rs573258498            | G                 | A      | 79  | 12  | 67  | South Asian      | 0.455696203 | 0.653420926 |
| ZBTB14 | chr18 | 5294005  | rs903159911            | A                 | T      | 2   | 0   | 2   | European         | 1           | 0           |
| ZBTB14 | chr18 | 5294010  | rs139703005            | CAfrican American | C      | 31  | 11  | 20  | East Asian       | 0.903225806 | 0.174817898 |
| ZBTB14 | chr18 | 5294013  | rs1019635860           | A                 | G      | 3   | 0   | 3   | European         | 0.666666667 | 0.444444444 |
| ZBTB14 | chr18 | 5295625  | chr18_5295625_CTGGCCCA | CTGGCCACGC        | C      | 6   | 0   | 6   | European         | 0.666666667 | 0.444444444 |
| ZBTB14 | chr18 | 5295643  | chr18_5295643_CGCTCGCA | CGCTCGCA          | C      | 8   | 0   | 8   | European         | 1           | 0           |
| ZBTB14 | chr18 | 5295644  | chr18_5295644_G_C      | G                 | C      | 16  | 0   | 16  | European         | 0.6875      | 0.4765625   |
| ZBTB14 | chr18 | 5295646  | rs1245142104           | T                 | TCGCAC | 3   | 1   | 2   | European         | 0.666666667 | 0.444444444 |
| ZBTB14 | chr18 | 5295646  | chr18_5295646_T_G      | T                 | G      | 228 | 68  | 160 | European         | 0.495614035 | 0.694136657 |
| ZBTB14 | chr18 | 5295646  | chr18_5295646_T_C      | T                 | C      | 71  | 9   | 62  | European         | 0.492957746 | 0.673675858 |
| ZBTB14 | chr18 | 5295646  | chr18_5295646_T_A      | T                 | A      | 5   | 2   | 3   | European         | 0.6         | 0.56        |
| ZBTB14 | chr18 | 5295648  | chr18_5295648_G_C      | G                 | C      | 53  | 8   | 45  | European         | 0.58490566  | 0.614453542 |
| ZBTB14 | chr18 | 5295650  | rs1272011218           | ACCGCG            | A      | 6   | 1   | 5   | African American | 0.666666667 | 0.444444444 |
| ZBTB14 | chr18 | 5295650  | rs1224590534           | A                 | ACCGCG | 3   | 0   | 3   | African American | 0.666666667 | 0.444444444 |
| ZBTB14 | chr18 | 5295650  | rs1482072479           | A                 | G      | 4   | 0   | 4   | European         | 0.75        | 0.375       |
| ZBTB14 | chr18 | 5295650  | chr18_5295650_A_C      | A                 | C      | 495 | 82  | 413 | European         | 0.565656566 | 0.632327314 |
| ZBTB14 | chr18 | 5295653  | chr18_5295653_G_C      | G                 | C      | 2   | 0   | 2   | European         | 1           | 0           |
| PIEZO2 | chr18 | 10671612 | rs546167077            | A                 | G      | 2   | 1   | 1   | European         | 1           | 0           |
| PIEZO2 | chr18 | 10671669 | rs189453524            | C                 | T      | 46  | 13  | 33  | Latin American 1 | 0.565217391 | 0.633270321 |
| PIEZO2 | chr18 | 10671678 | rs368809105            | T                 | C      | 2   | 0   | 2   | African American | 0.5         | 0.5         |
| PIEZO2 | chr18 | 10671778 | rs1008206665           | T                 | C      | 3   | 2   | 1   | Latin American 1 | 1           | 0           |
| PIEZO2 | chr18 | 10672735 | rs376761944            | T                 | C      | 2   | 1   | 1   | European         | 1           | 0           |
| PIEZO2 | chr18 | 10672745 | rs772787185            | C                 | T      | 5   | 2   | 3   | Latin American 1 | 1           | 0           |

|        |       |          |                    |   |   |    |    |    |                  |             |             |
|--------|-------|----------|--------------------|---|---|----|----|----|------------------|-------------|-------------|
| PIEZO2 | chr18 | 10672768 | rs367943583        | G | A | 4  | 2  | 2  | European         | 0.75        | 0.375       |
| PIEZO2 | chr18 | 10672769 | rs142364104        | G | C | 13 | 0  | 13 | European         | 0.846153846 | 0.26035503  |
| PIEZO2 | chr18 | 10672782 | rs1346102951       | G | C | 3  | 2  | 1  | European         | 1           | 0           |
| PIEZO2 | chr18 | 10672834 | chr18_10672834_T_A | T | A | 2  | 1  | 1  | European         | 0.5         | 0.5         |
| PIEZO2 | chr18 | 10675211 | rs142103035        | G | T | 34 | 13 | 21 | European         | 0.941176471 | 0.112456747 |
| PIEZO2 | chr18 | 10675222 | rs150780541        | C | G | 2  | 0  | 2  | AFR              | 0.5         | 0.5         |
| PIEZO2 | chr18 | 10675227 | rs781648426        | T | C | 3  | 1  | 2  | African American | 0.333333333 | 0.666666667 |
| PIEZO2 | chr18 | 10675251 | rs139155435        | G | A | 3  | 1  | 2  | European         | 1           | 0           |
| PIEZO2 | chr18 | 10675274 | rs752572148        | A | G | 2  | 0  | 2  | Latin American 2 | 1           | 0           |
| PIEZO2 | chr18 | 10677760 | rs1021952141       | A | G | 2  | 1  | 1  | European         | 1           | 0           |
| PIEZO2 | chr18 | 10677765 | rs147641839        | T | C | 9  | 4  | 5  | European         | 0.888888889 | 0.197530864 |
| PIEZO2 | chr18 | 10677766 | rs142229219        | C | T | 9  | 3  | 6  | African American | 0.777777778 | 0.345679012 |
| PIEZO2 | chr18 | 10677768 | rs370712216        | G | T | 4  | 2  | 2  | European         | 0.75        | 0.375       |
| PIEZO2 | chr18 | 10677796 | rs771164848        | T | C | 3  | 0  | 3  | South Asian      | 0.666666667 | 0.444444444 |
| PIEZO2 | chr18 | 10677841 | rs540106670        | T | C | 4  | 0  | 4  | South Asian      | 0.75        | 0.375       |
| PIEZO2 | chr18 | 10677859 | rs147666072        | C | T | 91 | 37 | 54 | European         | 0.78021978  | 0.366380872 |
| PIEZO2 | chr18 | 10680230 | rs1265530787       | A | G | 2  | 0  | 2  | European         | 1           | 0           |
| PIEZO2 | chr18 | 10680329 | rs199956726        | T | C | 2  | 2  | 0  | European         | 1           | 0           |
| PIEZO2 | chr18 | 10681677 | rs749859138        | G | A | 2  | 2  | 0  | European         | 1           | 0           |
| PIEZO2 | chr18 | 10681677 | chr18_10681677_G_C | G | C | 2  | 0  | 2  | East Asian       | 1           | 0           |
| PIEZO2 | chr18 | 10681682 | rs143299649        | T | C | 7  | 2  | 5  | European         | 1           | 0           |
| PIEZO2 | chr18 | 10681697 | chr18_10681697_G_C | G | C | 2  | 1  | 1  | Latin American 1 | 1           | 0           |
| PIEZO2 | chr18 | 10682232 | chr18_10682232_T_A | T | A | 2  | 0  | 2  | East Asian       | 1           | 0           |
| PIEZO2 | chr18 | 10682276 | rs1465863747       | C | T | 2  | 0  | 2  | European         | 0.5         | 0.5         |
| PIEZO2 | chr18 | 10689669 | rs757200280        | G | A | 5  | 2  | 3  | Latin American 2 | 0.4         | 0.72        |
| PIEZO2 | chr18 | 10689693 | rs1003370261       | G | A | 2  | 1  | 1  | African American | 0.5         | 0.5         |
| PIEZO2 | chr18 | 10689792 | rs202161305        | C | T | 3  | 1  | 2  | European         | 0.666666667 | 0.444444444 |
| PIEZO2 | chr18 | 10691247 | rs756549202        | C | T | 3  | 0  | 3  | European         | 0.666666667 | 0.444444444 |
| PIEZO2 | chr18 | 10691288 | rs138499457        | G | A | 12 | 7  | 5  | African American | 0.75        | 0.402777778 |
| PIEZO2 | chr18 | 10691334 | rs145948361        | C | T | 4  | 3  | 1  | African American | 1           | 0           |
| PIEZO2 | chr18 | 10696087 | rs768629308        | C | T | 5  | 0  | 5  | African American | 0.8         | 0.32        |
| PIEZO2 | chr18 | 10696099 | rs144506740        | A | C | 23 | 6  | 17 | European         | 0.913043478 | 0.15879017  |
| PIEZO2 | chr18 | 10696117 | rs371763741        | T | A | 2  | 2  | 0  | African American | 0.5         | 0.5         |
| PIEZO2 | chr18 | 10696227 | chr18_10696227_A_C | A | C | 58 | 10 | 48 | European         | 0.568965517 | 0.57372176  |
| PIEZO2 | chr18 | 10696409 | rs200500089        | C | T | 2  | 0  | 2  | European         | 1           | 0           |
| PIEZO2 | chr18 | 10696468 | rs145767108        | G | C | 3  | 1  | 2  | Latin American 1 | 0.666666667 | 0.444444444 |
| PIEZO2 | chr18 | 10696472 | rs551918181        | C | T | 4  | 1  | 3  | African American | 0.5         | 0.5         |
| PIEZO2 | chr18 | 10696517 | rs771088826        | T | G | 3  | 2  | 1  | European         | 1           | 0           |
| PIEZO2 | chr18 | 10696537 | rs376551561        | G | A | 2  | 1  | 1  | African American | 1           | 0           |
| PIEZO2 | chr18 | 10697781 | rs369467955        | T | C | 2  | 0  | 2  | African American | 0.5         | 0.5         |
| PIEZO2 | chr18 | 10697782 | rs751951617        | G | T | 9  | 2  | 7  | Latin American 1 | 0.333333333 | 0.716049383 |
| PIEZO2 | chr18 | 10697792 | rs746389777        | C | G | 2  | 0  | 2  | South Asian      | 1           | 0           |
| PIEZO2 | chr18 | 10697857 | chr18_10697857_T_C | T | C | 2  | 1  | 1  | European         | 1           | 0           |
| PIEZO2 | chr18 | 10698933 | rs765002398        | G | T | 3  | 1  | 2  | European         | 1           | 0           |
| PIEZO2 | chr18 | 10698936 | rs1347271554       | C | T | 4  | 2  | 2  | East Asian       | 1           | 0           |
| PIEZO2 | chr18 | 10698988 | rs377378831        | G | A | 7  | 1  | 6  | Latin American 2 | 0.714285714 | 0.408163265 |

|        |       |          |                    |            |      |     |     |     |                  |             |             |
|--------|-------|----------|--------------------|------------|------|-----|-----|-----|------------------|-------------|-------------|
| PIEZO2 | chr18 | 10698996 | rs745694128        | C          | T    | 13  | 3   | 10  | European         | 0.846153846 | 0.26035503  |
| PIEZO2 | chr18 | 10698997 | rs541120113        | G          | A    | 12  | 3   | 9   | European         | 0.75        | 0.416666667 |
| PIEZO2 | chr18 | 10698999 | rs184525296        | A          | C    | 2   | 0   | 2   | European         | 1           | 0           |
| PIEZO2 | chr18 | 10699023 | rs1279764958       | G          | A    | 3   | 1   | 2   | European         | 1           | 0           |
| PIEZO2 | chr18 | 10699048 | rs777548466        | C          | T    | 4   | 1   | 3   | Latin American 2 | 0.5         | 0.625       |
| PIEZO2 | chr18 | 10699065 | rs998498205        | T          | C    | 3   | 1   | 2   | African American | 0.666666667 | 0.444444444 |
| PIEZO2 | chr18 | 10699075 | rs750768276        | C          | T    | 10  | 4   | 6   | East Asian       | 0.8         | 0.34        |
| PIEZO2 | chr18 | 10699089 | rs79992793         | C          | G    | 557 | 172 | 385 | East Asian       | 0.538599641 | 0.623396046 |
| PIEZO2 | chr18 | 10699099 | rs754406783        | C          | T    | 4   | 0   | 4   | South Asian      | 0.75        | 0.375       |
| PIEZO2 | chr18 | 10699113 | rs543742006        | T          | C    | 3   | 1   | 2   | African American | 1           | 0           |
| PIEZO2 | chr18 | 10699144 | rs200276831        | C          | G    | 64  | 22  | 42  | European         | 0.765625    | 0.381835938 |
| PIEZO2 | chr18 | 10702030 | rs575579489        | T          | G    | 3   | 0   | 3   | European         | 1           | 0           |
| PIEZO2 | chr18 | 10702085 | rs1223151744       | G          | T    | 2   | 0   | 2   | African American | 0.5         | 0.5         |
| PIEZO2 | chr18 | 10704405 | rs780925886        | C          | T    | 5   | 3   | 2   | European         | 0.6         | 0.56        |
| PIEZO2 | chr18 | 10704425 | rs1480686209       | C          | T    | 5   | 0   | 5   | South Asian      | 0.8         | 0.32        |
| PIEZO2 | chr18 | 10704426 | rs771545517        | G          | A    | 3   | 1   | 2   | African American | 0.666666667 | 0.444444444 |
| PIEZO2 | chr18 | 10704429 | rs577065337        | G          | A    | 61  | 18  | 43  | Latin American 1 | 0.68852459  | 0.473528621 |
| PIEZO2 | chr18 | 10704450 | chr18_10704450_A_T | A          | T    | 10  | 3   | 7   | European         | 0.7         | 0.42        |
| PIEZO2 | chr18 | 10704551 | rs753662767        | C          | T    | 16  | 5   | 11  | East Asian       | 0.4375      | 0.609375    |
| PIEZO2 | chr18 | 10704555 | rs1027090051       | C          | A    | 6   | 0   | 6   | Latin American 2 | 0.666666667 | 0.444444444 |
| PIEZO2 | chr18 | 10704596 | rs779854352        | C          | T    | 3   | 1   | 2   | Latin American 2 | 0.666666667 | 0.444444444 |
| PIEZO2 | chr18 | 10704596 | chr18_10704596_C_A | C          | A    | 2   | 0   | 2   | European         | 1           | 0           |
| PIEZO2 | chr18 | 10704609 | rs552495360        | C          | T    | 4   | 2   | 2   | European         | 0.75        | 0.375       |
| PIEZO2 | chr18 | 10704639 | rs199842060        | C          | T    | 83  | 34  | 49  | European         | 0.879518072 | 0.223254464 |
| PIEZO2 | chr18 | 10705360 | rs1046341047       | G          | A    | 5   | 2   | 3   | European         | 1           | 0           |
| PIEZO2 | chr18 | 10705368 | rs762032787        | A          | T    | 5   | 1   | 4   | European         | 1           | 0           |
| PIEZO2 | chr18 | 10705412 | rs752628953        | G          | A    | 4   | 2   | 2   | Latin American 1 | 0.75        | 0.375       |
| PIEZO2 | chr18 | 10705418 | rs998757704        | C          | T    | 14  | 2   | 12  | Latin American 2 | 0.642857143 | 0.5         |
| PIEZO2 | chr18 | 10705438 | rs373973800        | C          | T    | 10  | 5   | 5   | European         | 0.7         | 0.46        |
| PIEZO2 | chr18 | 10705439 | rs569343097        | G          | A    | 3   | 1   | 2   | European         | 0.666666667 | 0.444444444 |
| PIEZO2 | chr18 | 10705457 | rs376897491        | C          | T    | 3   | 0   | 3   | African American | 0.666666667 | 0.444444444 |
| PIEZO2 | chr18 | 10705465 | rs1260084326       | G          | A    | 3   | 1   | 2   | European         | 0.666666667 | 0.444444444 |
| PIEZO2 | chr18 | 10705469 | rs761975741        | C          | A    | 2   | 0   | 2   | European         | 0.5         | 0.5         |
| PIEZO2 | chr18 | 10705483 | rs371431846        | T          | C    | 23  | 7   | 16  | European         | 0.782608696 | 0.355387524 |
| PIEZO2 | chr18 | 10705516 | rs116667912        | G          | T    | 155 | 49  | 106 | African American | 0.625806452 | 0.538938606 |
| PIEZO2 | chr18 | 10705529 | rs534950325        | C          | T    | 2   | 0   | 2   | East Asian       | 1           | 0           |
| PIEZO2 | chr18 | 10705583 | rs1384004544       | C          | T    | 5   | 5   | 0   | East Asian       | 0.6         | 0.56        |
| PIEZO2 | chr18 | 10705619 | rs763212098        | C          | T    | 12  | 3   | 9   | European         | 1           | 0           |
| PIEZO2 | chr18 | 10705632 | rs868681559        | C          | A    | 4   | 1   | 3   | African American | 1           | 0           |
| PIEZO2 | chr18 | 10705648 | rs998116301        | G          | A    | 2   | 1   | 1   | AFR              | 0.5         | 0.5         |
| PIEZO2 | chr18 | 10705651 | rs143388122        | G          | A    | 2   | 1   | 1   | East Asian       | 0.5         | 0.5         |
| PIEZO2 | chr18 | 10705660 | rs780207139        | G          | GCCT | 9   | 6   | 3   | European         | 0.777777778 | 0.345679012 |
| PIEZO2 | chr18 | 10705662 | rs1389848340       | C          | G    | 2   | 0   | 2   | East Asian       | 1           | 0           |
| PIEZO2 | chr18 | 10705693 | rs1440071419       | ATGGTCTCAG | A    | 5   | 4   | 1   | Latin American 1 | 0.6         | 0.48        |
| PIEZO2 | chr18 | 10705708 | rs62622495         | C          | G    | 163 | 45  | 118 | African American | 0.533742331 | 0.613271105 |
| PIEZO2 | chr18 | 10705715 | rs563775093        | G          | A    | 8   | 6   | 2   | European         | 0.875       | 0.21875     |

|        |       |          |                    |   |   |     |    |    |                  |             |             |
|--------|-------|----------|--------------------|---|---|-----|----|----|------------------|-------------|-------------|
| PIEZO2 | chr18 | 10708347 | rs989254477        | C | T | 3   | 1  | 2  | European         | 0.666666667 | 0.444444444 |
| PIEZO2 | chr18 | 10708348 | chr18_10708348_G_A | G | A | 2   | 0  | 2  | European         | 1           | 0           |
| PIEZO2 | chr18 | 10714809 | rs186065260        | G | C | 14  | 7  | 7  | European         | 0.928571429 | 0.132653061 |
| PIEZO2 | chr18 | 10714831 | rs753528530        | C | T | 6   | 1  | 5  | Latin American 1 | 0.333333333 | 0.722222222 |
| PIEZO2 | chr18 | 10714914 | rs778484639        | C | T | 5   | 3  | 2  | European         | 0.8         | 0.32        |
| PIEZO2 | chr18 | 10715662 | rs1003368666       | T | A | 4   | 2  | 2  | European         | 1           | 0           |
| PIEZO2 | chr18 | 10715687 | rs776659360        | C | A | 2   | 0  | 2  | European         | 0.5         | 0.5         |
| PIEZO2 | chr18 | 10715706 | rs776252501        | C | A | 4   | 0  | 4  | Latin American 1 | 0.5         | 0.625       |
| PIEZO2 | chr18 | 10715753 | rs1357127148       | A | G | 2   | 0  | 2  | Latin American 1 | 0.5         | 0.5         |
| PIEZO2 | chr18 | 10715754 | rs1230162848       | C | T | 4   | 1  | 3  | European         | 0.5         | 0.5         |
| PIEZO2 | chr18 | 10715784 | rs140862542        | T | C | 2   | 0  | 2  | African American | 1           | 0           |
| PIEZO2 | chr18 | 10715797 | rs376703258        | T | C | 9   | 5  | 4  | European         | 1           | 0           |
| PIEZO2 | chr18 | 10715811 | rs760036064        | T | C | 3   | 0  | 3  | European         | 1           | 0           |
| PIEZO2 | chr18 | 10718209 | rs114649884        | C | T | 34  | 6  | 28 | African American | 0.441176471 | 0.685121107 |
| PIEZO2 | chr18 | 10718214 | rs561912426        | T | C | 6   | 0  | 6  | South Asian      | 1           | 0           |
| PIEZO2 | chr18 | 10718239 | rs533157733        | G | C | 11  | 6  | 5  | East Asian       | 1           | 0           |
| PIEZO2 | chr18 | 10718239 | chr18_10718239_G_A | G | A | 3   | 0  | 3  | European         | 0.333333333 | 0.666666667 |
| PIEZO2 | chr18 | 10718243 | chr18_10718243_T_G | T | G | 8   | 3  | 5  | European         | 0.625       | 0.5625      |
| PIEZO2 | chr18 | 10718248 | rs544739855        | A | G | 6   | 0  | 6  | Latin American 1 | 0.666666667 | 0.5         |
| PIEZO2 | chr18 | 10731409 | rs369661357        | T | C | 104 | 30 | 74 | African American | 0.644230769 | 0.509985207 |
| PIEZO2 | chr18 | 10731424 | rs1242907179       | C | T | 6   | 1  | 5  | African American | 0.5         | 0.611111111 |
| PIEZO2 | chr18 | 10731436 | rs1243353768       | C | T | 2   | 0  | 2  | European         | 0.5         | 0.5         |
| PIEZO2 | chr18 | 10731437 | rs377309185        | G | A | 2   | 0  | 2  | South Asian      | 1           | 0           |
| PIEZO2 | chr18 | 10731454 | rs557512431        | C | G | 16  | 3  | 13 | African American | 0.625       | 0.5078125   |
| PIEZO2 | chr18 | 10731478 | rs190938950        | C | T | 143 | 48 | 95 | African American | 0.573426573 | 0.60227884  |
| PIEZO2 | chr18 | 10735299 | rs940024785        | A | G | 3   | 0  | 3  | European         | 0.666666667 | 0.444444444 |
| PIEZO2 | chr18 | 10736620 | rs374051556        | C | T | 12  | 8  | 4  | Latin American 1 | 0.666666667 | 0.513888889 |
| PIEZO2 | chr18 | 10736664 | rs762729542        | C | G | 8   | 1  | 7  | European         | 1           | 0           |
| PIEZO2 | chr18 | 10736677 | rs181523658        | G | A | 7   | 5  | 2  | Latin American 1 | 0.571428571 | 0.571428571 |
| PIEZO2 | chr18 | 10736702 | rs762144766        | T | C | 3   | 2  | 1  | Latin American 2 | 1           | 0           |
| PIEZO2 | chr18 | 10741054 | rs1333480840       | C | T | 4   | 0  | 4  | African American | 0.25        | 0.75        |
| PIEZO2 | chr18 | 10741082 | rs766911756        | C | T | 2   | 1  | 1  | European         | 0.5         | 0.5         |
| PIEZO2 | chr18 | 10741092 | rs1272259692       | G | T | 3   | 0  | 3  | European         | 0.666666667 | 0.444444444 |
| PIEZO2 | chr18 | 10742593 | rs115526553        | G | C | 34  | 16 | 18 | African American | 0.529411765 | 0.600346021 |
| PIEZO2 | chr18 | 10742607 | rs895352583        | C | T | 2   | 0  | 2  | European         | 1           | 0           |
| PIEZO2 | chr18 | 10742608 | rs773994726        | G | A | 2   | 0  | 2  | African American | 0.5         | 0.5         |
| PIEZO2 | chr18 | 10744155 | rs759076587        | G | C | 2   | 0  | 2  | European         | 1           | 0           |
| PIEZO2 | chr18 | 10744173 | chr18_10744173_C_G | C | G | 2   | 1  | 1  | African American | 1           | 0           |
| PIEZO2 | chr18 | 10744181 | rs879628108        | A | G | 3   | 0  | 3  | European         | 0.666666667 | 0.444444444 |
| PIEZO2 | chr18 | 10744198 | rs956535313        | T | G | 5   | 2  | 3  | Latin American 1 | 0.8         | 0.32        |
| PIEZO2 | chr18 | 10744205 | rs369615587        | A | G | 3   | 1  | 2  | European         | 0.666666667 | 0.444444444 |
| PIEZO2 | chr18 | 10744206 | rs373465659        | T | C | 6   | 2  | 4  | European         | 0.833333333 | 0.277777778 |
| PIEZO2 | chr18 | 10748508 | rs770850109        | C | T | 6   | 2  | 4  | European         | 1           | 0           |
| PIEZO2 | chr18 | 10750105 | rs749257673        | T | C | 28  | 7  | 21 | European         | 0.75        | 0.390306122 |
| PIEZO2 | chr18 | 10750140 | rs778876785        | C | G | 4   | 3  | 1  | European         | 1           | 0           |
| PIEZO2 | chr18 | 10750151 | rs1318919805       | T | C | 3   | 0  | 3  | Latin American 2 | 1           | 0           |

|        |       |          |                    |   |   |     |     |     |                  |             |             |
|--------|-------|----------|--------------------|---|---|-----|-----|-----|------------------|-------------|-------------|
| PIEZO2 | chr18 | 10750157 | rs947854422        | C | T | 2   | 0   | 2   | European         | 1           | 0           |
| PIEZO2 | chr18 | 10752689 | rs534984825        | C | T | 5   | 4   | 1   | European         | 1           | 0           |
| PIEZO2 | chr18 | 10752697 | rs1356279084       | C | T | 2   | 0   | 2   | European         | 0.5         | 0.5         |
| PIEZO2 | chr18 | 10752718 | rs1053484878       | T | C | 9   | 2   | 7   | Latin American 2 | 0.888888889 | 0.197530864 |
| PIEZO2 | chr18 | 10752850 | rs754312134        | A | G | 7   | 2   | 5   | Latin American 1 | 1           | 0           |
| PIEZO2 | chr18 | 10752852 | chr18_10752852_G_C | G | C | 2   | 0   | 2   | South Asian      | 1           | 0           |
| PIEZO2 | chr18 | 10752862 | rs9959296          | G | A | 642 | 187 | 455 | African American | 0.551401869 | 0.607069031 |
| PIEZO2 | chr18 | 10757985 | rs371703803        | C | G | 31  | 12  | 19  | European         | 0.935483871 | 0.122788762 |
| PIEZO2 | chr18 | 10758020 | rs1179702583       | T | C | 5   | 0   | 5   | Latin American 2 | 0.6         | 0.48        |
| PIEZO2 | chr18 | 10758044 | rs878853021        | T | C | 3   | 1   | 2   | European         | 0.666666667 | 0.444444444 |
| PIEZO2 | chr18 | 10758084 | rs975131824        | C | T | 2   | 1   | 1   | Latin American 1 | 0.5         | 0.5         |
| PIEZO2 | chr18 | 10758098 | rs923388115        | C | T | 2   | 0   | 2   | African American | 1           | 0           |
| PIEZO2 | chr18 | 10758099 | rs188320964        | G | C | 24  | 1   | 23  | South Asian      | 0.916666667 | 0.15625     |
| PIEZO2 | chr18 | 10759485 | rs139073574        | C | T | 2   | 0   | 2   | African American | 0.5         | 0.5         |
| PIEZO2 | chr18 | 10759505 | rs371101691        | C | T | 16  | 4   | 12  | African American | 0.375       | 0.75        |
| PIEZO2 | chr18 | 10759509 | rs73946020         | C | T | 330 | 100 | 230 | African American | 0.439393939 | 0.667621671 |
| PIEZO2 | chr18 | 10759511 | rs376185795        | A | G | 24  | 5   | 19  | European         | 0.375       | 0.736111111 |
| PIEZO2 | chr18 | 10759542 | rs1307968548       | T | C | 2   | 0   | 2   | European         | 1           | 0           |
| PIEZO2 | chr18 | 10759731 | rs775333233        | A | G | 2   | 0   | 2   | European         | 0.5         | 0.5         |
| PIEZO2 | chr18 | 10759792 | rs368619087        | T | C | 2   | 0   | 2   | Latin American 2 | 1           | 0           |
| PIEZO2 | chr18 | 10759816 | rs760341535        | G | A | 2   | 1   | 1   | Latin American 1 | 0.5         | 0.5         |
| PIEZO2 | chr18 | 10759822 | rs763627542        | A | G | 2   | 0   | 2   | Latin American 1 | 1           | 0           |
| PIEZO2 | chr18 | 10759831 | rs377638188        | C | T | 10  | 2   | 8   | European         | 0.9         | 0.18        |
| PIEZO2 | chr18 | 10759843 | rs375888693        | A | T | 4   | 3   | 1   | European         | 1           | 0           |
| PIEZO2 | chr18 | 10759853 | rs930564863        | C | T | 3   | 0   | 3   | European         | 1           | 0           |
| PIEZO2 | chr18 | 10759854 | rs575453211        | A | G | 2   | 0   | 2   | African American | 1           | 0           |
| PIEZO2 | chr18 | 10759860 | rs747108006        | T | C | 2   | 0   | 2   | Latin American 1 | 0.5         | 0.5         |
| PIEZO2 | chr18 | 10760943 | rs1416413409       | T | C | 5   | 1   | 4   | European         | 1           | 0           |
| PIEZO2 | chr18 | 10760982 | rs918877202        | G | A | 3   | 1   | 2   | European         | 1           | 0           |
| PIEZO2 | chr18 | 10761024 | rs1249752278       | C | T | 3   | 2   | 1   | European         | 0.666666667 | 0.444444444 |
| PIEZO2 | chr18 | 10761026 | rs759920772        | G | A | 7   | 4   | 3   | East Asian       | 0.714285714 | 0.448979592 |
| PIEZO2 | chr18 | 10761038 | rs553574900        | C | T | 4   | 0   | 4   | South Asian      | 0.75        | 0.375       |
| PIEZO2 | chr18 | 10761050 | rs192225494        | T | C | 25  | 7   | 18  | European         | 0.96        | 0.0768      |
| PIEZO2 | chr18 | 10761062 | rs371576361        | C | T | 8   | 4   | 4   | Latin American 1 | 0.375       | 0.65625     |
| PIEZO2 | chr18 | 10761069 | rs956022243        | T | C | 6   | 5   | 1   | African American | 0.5         | 0.5         |
| PIEZO2 | chr18 | 10761071 | rs375270254        | G | A | 2   | 0   | 2   | European         | 1           | 0           |
| PIEZO2 | chr18 | 10762532 | rs942385292        | G | A | 8   | 4   | 4   | European         | 0.75        | 0.40625     |
| PIEZO2 | chr18 | 10762600 | rs536129455        | G | C | 25  | 9   | 16  | Latin American 1 | 1           | 0           |
| PIEZO2 | chr18 | 10762923 | rs1218767117       | A | G | 2   | 0   | 2   | European         | 1           | 0           |
| PIEZO2 | chr18 | 10762974 | rs1186893765       | A | G | 5   | 1   | 4   | Latin American 1 | 1           | 0           |
| PIEZO2 | chr18 | 10762987 | rs776666346        | C | T | 2   | 0   | 2   | African American | 0.5         | 0.5         |
| PIEZO2 | chr18 | 10763031 | rs200121260        | C | T | 14  | 7   | 7   | European         | 0.428571429 | 0.714285714 |
| PIEZO2 | chr18 | 10763032 | rs542441369        | G | A | 8   | 2   | 6   | European         | 0.625       | 0.46875     |
| PIEZO2 | chr18 | 10763034 | rs1409494922       | C | T | 2   | 0   | 2   | European         | 0.5         | 0.5         |
| PIEZO2 | chr18 | 10763044 | rs1331740910       | C | T | 3   | 0   | 3   | European         | 0.666666667 | 0.444444444 |
| PIEZO2 | chr18 | 10763049 | rs150545165        | G | A | 2   | 1   | 1   | East Asian       | 0.5         | 0.5         |

|        |       |          |                    |      |   |    |    |    |                  |             |             |
|--------|-------|----------|--------------------|------|---|----|----|----|------------------|-------------|-------------|
| PIEZO2 | chr18 | 10763067 | chr18_10763067_G_T | G    | T | 4  | 1  | 3  | Latin American 1 | 1           | 0           |
| PIEZO2 | chr18 | 10773418 | rs765555471        | T    | A | 2  | 1  | 1  | European         | 0.5         | 0.5         |
| PIEZO2 | chr18 | 10773442 | rs564867814        | C    | T | 53 | 7  | 46 | South Asian      | 0.471698113 | 0.661445354 |
| PIEZO2 | chr18 | 10773454 | rs750411760        | C    | T | 4  | 2  | 2  | Latin American 2 | 0.75        | 0.375       |
| PIEZO2 | chr18 | 10773472 | rs369232281        | C    | T | 7  | 0  | 7  | South Asian      | 0.714285714 | 0.408163265 |
| PIEZO2 | chr18 | 10773514 | rs1034085783       | A    | T | 4  | 1  | 3  | Latin American 1 | 1           | 0           |
| PIEZO2 | chr18 | 10773517 | chr18_10773517_C_A | C    | A | 2  | 0  | 2  | Latin American 2 | 1           | 0           |
| PIEZO2 | chr18 | 10773582 | chr18_10773582_A_C | A    | C | 4  | 0  | 4  | African American | 0.25        | 0.75        |
| PIEZO2 | chr18 | 10773586 | rs1483520376       | G    | A | 2  | 0  | 2  | European         | 1           | 0           |
| PIEZO2 | chr18 | 10773588 | rs772436073        | A    | G | 5  | 0  | 5  | Latin American 2 | 0.6         | 0.48        |
| PIEZO2 | chr18 | 10773594 | rs1254568295       | G    | A | 4  | 0  | 4  | European         | 1           | 0           |
| PIEZO2 | chr18 | 10773603 | rs529806981        | G    | A | 6  | 4  | 2  | African American | 0.5         | 0.666666667 |
| PIEZO2 | chr18 | 10773618 | rs750906972        | G    | A | 3  | 2  | 1  | European         | 0.666666667 | 0.444444444 |
| PIEZO2 | chr18 | 10780332 | rs753278616        | T    | C | 49 | 10 | 39 | African American | 0.591836735 | 0.581424406 |
| PIEZO2 | chr18 | 10780344 | rs746058777        | C    | T | 3  | 1  | 2  | European         | 1           | 0           |
| PIEZO2 | chr18 | 10780346 | rs778369027        | C    | T | 5  | 0  | 5  | European         | 0.6         | 0.56        |
| PIEZO2 | chr18 | 10780347 | rs907548476        | G    | A | 3  | 1  | 2  | European         | 0.666666667 | 0.444444444 |
| PIEZO2 | chr18 | 10784827 | rs375966918        | C    | G | 2  | 0  | 2  | Latin American 2 | 1           | 0           |
| PIEZO2 | chr18 | 10784864 | rs368668265        | G    | C | 12 | 3  | 9  | African American | 0.916666667 | 0.152777778 |
| PIEZO2 | chr18 | 10784908 | rs1413072847       | G    | A | 2  | 1  | 1  | African American | 0.5         | 0.5         |
| PIEZO2 | chr18 | 10787059 | rs200626126        | A    | T | 2  | 1  | 1  | European         | 1           | 0           |
| PIEZO2 | chr18 | 10787096 | chr18_10787096_G_C | G    | C | 8  | 4  | 4  | Latin American 1 | 1           | 0           |
| PIEZO2 | chr18 | 10787115 | chr18_10787115_C_T | C    | T | 2  | 0  | 2  | European         | 1           | 0           |
| PIEZO2 | chr18 | 10787117 | rs1180503825       | A    | G | 4  | 1  | 3  | European         | 1           | 0           |
| PIEZO2 | chr18 | 10789147 | rs751229811        | C    | T | 2  | 2  | 0  | European         | 1           | 0           |
| PIEZO2 | chr18 | 10789156 | chr18_10789156_C_A | C    | A | 6  | 4  | 2  | European         | 1           | 0           |
| PIEZO2 | chr18 | 10789161 | chr18_10789161_A_G | A    | G | 2  | 1  | 1  | European         | 1           | 0           |
| PIEZO2 | chr18 | 10789182 | chr18_10789182_T_C | T    | C | 2  | 0  | 2  | African American | 0.5         | 0.5         |
| PIEZO2 | chr18 | 10789241 | rs1469103674       | C    | A | 2  | 1  | 1  | European         | 0.5         | 0.5         |
| PIEZO2 | chr18 | 10789247 | rs754994085        | ATCT | A | 3  | 1  | 2  | Latin American 1 | 0.666666667 | 0.444444444 |
| PIEZO2 | chr18 | 10789275 | rs756753673        | A    | C | 7  | 0  | 7  | European         | 1           | 0           |
| PIEZO2 | chr18 | 10789307 | rs1021262669       | T    | G | 2  | 1  | 1  | European         | 1           | 0           |
| PIEZO2 | chr18 | 10789329 | rs545457587        | G    | T | 13 | 6  | 7  | East Asian       | 1           | 0           |
| PIEZO2 | chr18 | 10789330 | chr18_10789330_G_A | G    | A | 3  | 3  | 0  | East Asian       | 1           | 0           |
| PIEZO2 | chr18 | 10789365 | rs375721417        | T    | A | 4  | 0  | 4  | African American | 0.5         | 0.625       |
| PIEZO2 | chr18 | 10791222 | rs376057592        | T    | A | 27 | 12 | 15 | European         | 0.925925926 | 0.139917695 |
| PIEZO2 | chr18 | 10794956 | rs779017622        | A    | G | 2  | 2  | 0  | European         | 1           | 0           |
| PIEZO2 | chr18 | 10797434 | chr18_10797434_C_G | C    | G | 2  | 1  | 1  | AFR              | 0.5         | 0.5         |
| PIEZO2 | chr18 | 10797453 | rs534855857        | C    | T | 5  | 1  | 4  | African American | 0.4         | 0.64        |
| PIEZO2 | chr18 | 10797468 | rs181395487        | C    | T | 2  | 1  | 1  | Latin American 1 | 1           | 0           |
| PIEZO2 | chr18 | 10797468 | chr18_10797468_C_G | C    | G | 2  | 1  | 1  | MEN              | 0.5         | 0.5         |
| PIEZO2 | chr18 | 10797469 | rs371517199        | G    | A | 13 | 1  | 12 | African American | 0.461538462 | 0.568047337 |
| PIEZO2 | chr18 | 10797490 | rs998208177        | C    | G | 5  | 2  | 3  | African American | 1           | 0           |
| PIEZO2 | chr18 | 10797508 | rs1383443423       | C    | T | 3  | 2  | 1  | East Asian       | 1           | 0           |
| PIEZO2 | chr18 | 10800363 | rs747264342        | C    | T | 2  | 0  | 2  | African American | 0.5         | 0.5         |
| PIEZO2 | chr18 | 10800364 | rs757512135        | G    | A | 9  | 2  | 7  | African American | 0.444444444 | 0.691358025 |

|        |       |          |                    |   |   |     |     |     |                  |             |             |
|--------|-------|----------|--------------------|---|---|-----|-----|-----|------------------|-------------|-------------|
| PIEZO2 | chr18 | 10800445 | rs768638341        | C | T | 7   | 3   | 4   | European         | 0.285714286 | 0.734693878 |
| PIEZO2 | chr18 | 10800450 | rs145013609        | T | A | 80  | 38  | 42  | East Asian       | 0.875       | 0.2240625   |
| PIEZO2 | chr18 | 10800454 | rs202104395        | C | G | 63  | 19  | 44  | European         | 0.904761905 | 0.176366843 |
| PIEZO2 | chr18 | 10800454 | chr18_10800454_C_T | C | T | 3   | 1   | 2   | East Asian       | 1           | 0           |
| PIEZO2 | chr18 | 10800466 | rs369473273        | C | G | 59  | 17  | 42  | African American | 0.559322034 | 0.555587475 |
| PIEZO2 | chr18 | 10801403 | rs61978645         | T | C | 531 | 157 | 374 | African American | 0.561205273 | 0.579498583 |
| PIEZO2 | chr18 | 10803888 | rs780240231        | G | T | 4   | 1   | 3   | European         | 1           | 0           |
| PIEZO2 | chr18 | 10803918 | rs962106943        | C | T | 8   | 3   | 5   | European         | 0.875       | 0.21875     |
| PIEZO2 | chr18 | 10803919 | rs536250412        | G | A | 25  | 0   | 25  | South Asian      | 0.96        | 0.0768      |
| PIEZO2 | chr18 | 10803961 | rs991673822        | C | T | 6   | 2   | 4   | European         | 0.5         | 0.666666667 |
| PIEZO2 | chr18 | 10803963 | rs1265711106       | T | A | 2   | 1   | 1   | European         | 1           | 0           |
| PIEZO2 | chr18 | 10807135 | rs746454490        | G | A | 2   | 2   | 0   | European         | 1           | 0           |
| PIEZO2 | chr18 | 10807179 | rs766490338        | G | A | 4   | 1   | 3   | European         | 0.75        | 0.375       |
| PIEZO2 | chr18 | 10807186 | rs368601054        | C | T | 24  | 2   | 22  | South Asian      | 0.916666667 | 0.152777778 |
| PIEZO2 | chr18 | 10807200 | rs942548867        | G | A | 8   | 0   | 8   | Latin American 2 | 0.625       | 0.53125     |
| PIEZO2 | chr18 | 10807209 | rs762063796        | G | A | 2   | 0   | 2   | African American | 0.5         | 0.5         |
| PIEZO2 | chr18 | 10807245 | rs374993280        | G | T | 25  | 5   | 20  | African American | 0.44        | 0.6048      |
| PIEZO2 | chr18 | 10855360 | rs751565062        | A | G | 6   | 0   | 6   | African American | 0.333333333 | 0.666666667 |
| PIEZO2 | chr18 | 10855368 | rs932122119        | T | C | 3   | 0   | 3   | African American | 0.666666667 | 0.444444444 |
| PIEZO2 | chr18 | 10855419 | rs1458802183       | A | G | 2   | 2   | 0   | European         | 1           | 0           |
| PIEZO2 | chr18 | 10855478 | rs749553994        | G | T | 2   | 0   | 2   | South Asian      | 1           | 0           |
| PIEZO2 | chr18 | 10855479 | rs367678053        | T | C | 8   | 1   | 7   | European         | 0.375       | 0.71875     |
| PIEZO2 | chr18 | 10855488 | rs762281198        | C | T | 4   | 2   | 2   | European         | 0.75        | 0.375       |
| PIEZO2 | chr18 | 10855489 | rs760632558        | G | A | 3   | 2   | 1   | European         | 1           | 0           |
| PIEZO2 | chr18 | 10855502 | rs1441714248       | C | G | 3   | 0   | 3   | Latin American 2 | 1           | 0           |
| PIEZO2 | chr18 | 10857036 | rs186999439        | C | T | 24  | 9   | 15  | East Asian       | 0.958333333 | 0.079861111 |
| PIEZO2 | chr18 | 10857050 | rs146745925        | C | G | 29  | 13  | 16  | European         | 0.931034483 | 0.128418549 |
| PIEZO2 | chr18 | 10857084 | rs527795460        | A | G | 24  | 6   | 18  | Latin American 2 | 0.75        | 0.402777778 |
| PIEZO2 | chr18 | 10857099 | rs760374118        | C | A | 19  | 8   | 11  | European         | 0.842105263 | 0.27700831  |
| PIEZO2 | chr18 | 10857100 | rs1298773035       | G | A | 2   | 0   | 2   | Latin American 1 | 0.5         | 0.5         |
| PIEZO2 | chr18 | 10857106 | rs765849127        | T | C | 3   | 0   | 3   | Latin American 2 | 1           | 0           |
| PIEZO2 | chr18 | 10857117 | rs772566169        | G | A | 2   | 2   | 0   | European         | 1           | 0           |
| PIEZO2 | chr18 | 10857133 | rs1217758784       | C | T | 2   | 0   | 2   | Latin American 1 | 0.5         | 0.5         |
| PIEZO2 | chr18 | 10871275 | rs1025310776       | G | A | 4   | 0   | 4   | African American | 0.25        | 0.75        |
| PIEZO2 | chr18 | 10871279 | rs765877353        | T | G | 2   | 0   | 2   | South Asian      | 1           | 0           |
| PIEZO2 | chr18 | 10871282 | rs1001558334       | T | A | 4   | 2   | 2   | European         | 1           | 0           |
| PIEZO2 | chr18 | 10871300 | rs560268532        | T | C | 9   | 3   | 6   | European         | 1           | 0           |
| PIEZO2 | chr18 | 10871306 | rs1285330647       | G | T | 2   | 1   | 1   | European         | 1           | 0           |
| PIEZO2 | chr18 | 10871360 | rs1440517233       | T | A | 3   | 1   | 2   | Latin American 2 | 0.666666667 | 0.444444444 |
| PIEZO2 | chr18 | 10911204 | rs1004525435       | C | T | 4   | 0   | 4   | AFR              | 0.75        | 0.375       |
| PIEZO2 | chr18 | 10979549 | rs374753475        | G | A | 6   | 1   | 5   | African American | 0.666666667 | 0.5         |
| PIEZO2 | chr18 | 10979555 | rs368872771        | C | T | 8   | 2   | 6   | Latin American 1 | 0.375       | 0.71875     |
| PIEZO2 | chr18 | 10979556 | rs557549695        | G | A | 6   | 2   | 4   | African American | 0.5         | 0.5         |
| PIEZO2 | chr18 | 10979631 | rs574038773        | A | T | 2   | 0   | 2   | European         | 1           | 0           |
| PIEZO2 | chr18 | 10979648 | rs879674484        | C | T | 4   | 3   | 1   | European         | 1           | 0           |
| PIEZO2 | chr18 | 10979649 | rs142351929        | G | A | 6   | 0   | 6   | European         | 0.5         | 0.611111111 |

|         |       |          |                         |   |           |     |    |     |                  |             |             |
|---------|-------|----------|-------------------------|---|-----------|-----|----|-----|------------------|-------------|-------------|
| PIEZO2  | chr18 | 11066129 | rs1316183316            | T | G         | 6   | 1  | 5   | East Asian       | 0.833333333 | 0.277777778 |
| PIEZO2  | chr18 | 11066135 | rs371432372             | G | A         | 28  | 10 | 18  | European         | 0.892857143 | 0.196428571 |
| PIEZO2  | chr18 | 11066136 | rs778506919             | T | A         | 2   | 0  | 2   | European         | 1           | 0           |
| PIEZO2  | chr18 | 11066140 | chr18_11066140_T_G      | T | G         | 592 | 76 | 516 | European         | 0.614864865 | 0.583786066 |
| PIEZO2  | chr18 | 11066147 | rs1190752171            | G | T         | 77  | 11 | 66  | European         | 0.688311688 | 0.496205094 |
| PIEZO2  | chr18 | 11066151 | chr18_11066151_C_G      | C | G         | 40  | 5  | 35  | European         | 0.8         | 0.34875     |
| PIEZO2  | chr18 | 11066153 | rs932596927             | G | A         | 2   | 2  | 0   | European         | 1           | 0           |
| PIEZO2  | chr18 | 11066201 | rs772178114             | C | A         | 8   | 1  | 7   | European         | 0.875       | 0.21875     |
| CABLES1 | chr18 | 23135764 | rs1484841744            | T | TGGC      | 61  | 22 | 39  | Latin American 1 | 0.426229508 | 0.657887665 |
| CABLES1 | chr18 | 23135764 | chr18_23135764_T_TGGCGC | T | TGGCGGC   | 46  | 12 | 34  | European         | 0.52173913  | 0.640831758 |
| CABLES1 | chr18 | 23135764 | chr18_23135764_T_TGGCGC | T | TGGCGGCGC | 5   | 0  | 5   | Native American  | 0.6         | 0.56        |
| CABLES1 | chr18 | 23135778 | chr18_23135778_G_A      | G | A         | 6   | 3  | 3   | East Asian       | 1           | 0           |
| CABLES1 | chr18 | 23135779 | chr18_23135779_C_G      | C | G         | 96  | 9  | 87  | European         | 0.625       | 0.564453125 |
| CABLES1 | chr18 | 23135782 | chr18_23135782_C_G      | C | G         | 55  | 8  | 47  | European         | 0.6         | 0.575206612 |
| CABLES1 | chr18 | 23135784 | chr18_23135784_G_C      | G | C         | 87  | 19 | 68  | European         | 0.655172414 | 0.530321046 |
| CABLES1 | chr18 | 23135787 | chr18_23135787_A_C      | A | C         | 364 | 83 | 281 | European         | 0.535714286 | 0.664035141 |
| CABLES1 | chr18 | 23135790 | chr18_23135790_A_C      | A | C         | 398 | 64 | 334 | European         | 0.522613065 | 0.660627257 |
| CABLES1 | chr18 | 23135796 | rs1408623723            | G | C         | 4   | 3  | 1   | European         | 0.75        | 0.375       |
| CABLES1 | chr18 | 23135805 | rs951283598             | A | G         | 3   | 1  | 2   | African American | 1           | 0           |
| CABLES1 | chr18 | 23135813 | rs982750117             | C | G         | 350 | 71 | 279 | Latin American 2 | 0.517142857 | 0.629583673 |
| CABLES1 | chr18 | 23135823 | chr18_23135823_G_A      | G | A         | 2   | 1  | 1   | European         | 1           | 0           |
| CABLES1 | chr18 | 23135845 | rs921023034             | T | TGCA      | 4   | 0  | 4   | Latin American 2 | 1           | 0           |
| CABLES1 | chr18 | 23135851 | rs936383395             | A | AGCC      | 2   | 2  | 0   | African American | 0.5         | 0.5         |
| CABLES1 | chr18 | 23135853 | rs914104400             | C | A         | 2   | 0  | 2   | European         | 1           | 0           |
| CABLES1 | chr18 | 23135854 | rs945522491             | C | T         | 16  | 5  | 11  | African American | 0.375       | 0.6953125   |
| CABLES1 | chr18 | 23135862 | chr18_23135862_C_A      | C | A         | 2   | 0  | 2   | Latin American 2 | 1           | 0           |
| CABLES1 | chr18 | 23135878 | rs1046665983            | C | G         | 21  | 3  | 18  | AFR              | 0.476190476 | 0.607709751 |
| CABLES1 | chr18 | 23135878 | chr18_23135878_C_T      | C | T         | 8   | 3  | 5   | African American | 0.625       | 0.46875     |
| CABLES1 | chr18 | 23135926 | chr18_23135926_C_G      | C | G         | 3   | 2  | 1   | East Asian       | 1           | 0           |
| CABLES1 | chr18 | 23135926 | chr18_23135926_C_T      | C | T         | 2   | 1  | 1   | European         | 0.5         | 0.5         |
| CABLES1 | chr18 | 23135928 | rs751362226             | C | T         | 15  | 6  | 9   | European         | 0.533333333 | 0.604444444 |
| CABLES1 | chr18 | 23135929 | rs868512083             | G | T         | 4   | 1  | 3   | AFR              | 0.75        | 0.375       |
| CABLES1 | chr18 | 23135974 | chr18_23135974_A_C      | A | C         | 2   | 0  | 2   | European         | 1           | 0           |
| CABLES1 | chr18 | 23136073 | rs920622592             | C | T         | 2   | 0  | 2   | African American | 1           | 0           |
| CABLES1 | chr18 | 23136078 | chr18_23136078_A_C      | A | C         | 2   | 1  | 1   | European         | 0.5         | 0.5         |
| CABLES1 | chr18 | 23136102 | rs28579197              | G | A         | 275 | 82 | 193 | African American | 0.483636364 | 0.612892562 |
| CABLES1 | chr18 | 23136103 | rs28477404              | C | A         | 275 | 82 | 193 | African American | 0.483636364 | 0.612892562 |
| CABLES1 | chr18 | 23136145 | rs1460719555            | C | A         | 2   | 1  | 1   | European         | 0.5         | 0.5         |
| CABLES1 | chr18 | 23136153 | chr18_23136153_G_A      | G | A         | 2   | 0  | 2   | Latin American 2 | 1           | 0           |
| CABLES1 | chr18 | 23136187 | rs957725447             | A | G         | 4   | 1  | 3   | European         | 1           | 0           |
| CABLES1 | chr18 | 23136187 | chr18_23136187_A_T      | A | T         | 2   | 0  | 2   | European         | 1           | 0           |
| CABLES1 | chr18 | 23136201 | rs1010505803            | C | T         | 5   | 1  | 4   | African American | 0.8         | 0.32        |
| CABLES1 | chr18 | 23136202 | rs753384032             | C | T         | 14  | 6  | 8   | European         | 0.642857143 | 0.520408163 |
| CABLES1 | chr18 | 23136225 | rs981882166             | G | T         | 33  | 14 | 19  | Latin American 1 | 0.878787879 | 0.213039486 |
| CABLES1 | chr18 | 23136274 | rs1371263506            | G | A         | 5   | 1  | 4   | Latin American 2 | 0.6         | 0.48        |
| CABLES1 | chr18 | 23136276 | rs907952775             | G | A         | 34  | 10 | 24  | European         | 0.794117647 | 0.344290657 |

|         |       |          |                    |      |   |     |     |     |                  |             |             |
|---------|-------|----------|--------------------|------|---|-----|-----|-----|------------------|-------------|-------------|
| CABLES1 | chr18 | 23136289 | chr18_23136289_C_T | C    | T | 2   | 0   | 2   | Latin American 1 | 0.5         | 0.5         |
| CABLES1 | chr18 | 23136294 | rs200098768        | G    | A | 389 | 130 | 259 | European         | 0.771208226 | 0.390970189 |
| CABLES1 | chr18 | 23136369 | rs749555191        | G    | T | 6   | 1   | 5   | European         | 1           | 0           |
| CABLES1 | chr18 | 23136372 | rs768710802        | G    | A | 4   | 3   | 1   | Latin American 1 | 0.5         | 0.5         |
| CABLES1 | chr18 | 23136399 | rs766367851        | G    | T | 3   | 1   | 2   | European         | 1           | 0           |
| CABLES1 | chr18 | 23136411 | rs759407060        | G    | A | 3   | 1   | 2   | Latin American 2 | 1           | 0           |
| CABLES1 | chr18 | 23136421 | rs752113235        | C    | T | 3   | 0   | 3   | European         | 0.666666667 | 0.444444444 |
| CABLES1 | chr18 | 23136426 | rs375982901        | G    | C | 3   | 2   | 1   | African American | 0.666666667 | 0.444444444 |
| CABLES1 | chr18 | 23136450 | rs201214897        | C    | T | 36  | 13  | 23  | African American | 0.555555556 | 0.589506173 |
| CABLES1 | chr18 | 23136465 | rs746862164        | G    | A | 2   | 1   | 1   | Latin American 2 | 1           | 0           |
| CABLES1 | chr18 | 23136480 | rs79793507         | C    | T | 125 | 38  | 87  | Latin American 1 | 0.504       | 0.603264    |
| CABLES1 | chr18 | 23136537 | rs780136681        | AACT | A | 7   | 2   | 5   | European         | 0.428571429 | 0.653061224 |
| CABLES1 | chr18 | 23136549 | rs769812959        | C    | G | 2   | 2   | 0   | European         | 1           | 0           |
| CABLES1 | chr18 | 23188839 | rs529420681        | C    | T | 5   | 2   | 3   | East Asian       | 0.6         | 0.56        |
| CABLES1 | chr18 | 23188858 | rs151062978        | G    | A | 154 | 52  | 102 | African American | 0.668831169 | 0.502867263 |
| CABLES1 | chr18 | 23188905 | rs767746873        | C    | T | 3   | 1   | 2   | European         | 0.666666667 | 0.444444444 |
| CABLES1 | chr18 | 23188906 | rs116944617        | G    | A | 165 | 41  | 124 | European         | 0.503030303 | 0.664756657 |
| CABLES1 | chr18 | 23194453 | rs1230797331       | G    | A | 3   | 0   | 3   | European         | 1           | 0           |
| CABLES1 | chr18 | 23194515 | rs746579340        | C    | T | 7   | 2   | 5   | European         | 0.857142857 | 0.244897959 |
| CABLES1 | chr18 | 23194525 | rs758312922        | A    | G | 2   | 0   | 2   | South Asian      | 1           | 0           |
| CABLES1 | chr18 | 23214035 | rs772653223        | C    | T | 2   | 0   | 2   | European         | 0.5         | 0.5         |
| CABLES1 | chr18 | 23214050 | rs183575205        | G    | A | 8   | 1   | 7   | European         | 0.75        | 0.375       |
| CABLES1 | chr18 | 23234621 | rs760627292        | G    | A | 2   | 0   | 2   | AFR              | 1           | 0           |
| CABLES1 | chr18 | 23234624 | rs776240908        | G    | A | 4   | 0   | 4   | South Asian      | 0.75        | 0.375       |
| CABLES1 | chr18 | 23234656 | rs762631339        | G    | C | 2   | 0   | 2   | South Asian      | 1           | 0           |
| CABLES1 | chr18 | 23235943 | rs370732463        | C    | T | 2   | 1   | 1   | East Asian       | 0.5         | 0.5         |
| CABLES1 | chr18 | 23235944 | rs373572190        | G    | A | 10  | 3   | 7   | Latin American 1 | 0.7         | 0.42        |
| CABLES1 | chr18 | 23235985 | rs377655942        | C    | T | 4   | 0   | 4   | European         | 0.5         | 0.625       |
| CABLES1 | chr18 | 23236001 | rs768273037        | G    | A | 3   | 1   | 2   | East Asian       | 0.666666667 | 0.444444444 |
| CABLES1 | chr18 | 23236019 | rs567251478        | G    | A | 8   | 0   | 8   | South Asian      | 0.75        | 0.40625     |
| CABLES1 | chr18 | 23237222 | rs763088478        | G    | A | 2   | 2   | 0   | East Asian       | 0.5         | 0.5         |
| CABLES1 | chr18 | 23252988 | rs756944411        | C    | T | 2   | 0   | 2   | European         | 1           | 0           |
| CABLES1 | chr18 | 23253011 | rs370752492        | G    | A | 2   | 1   | 1   | European         | 1           | 0           |
| CABLES1 | chr18 | 23253730 | rs200230358        | C    | G | 25  | 6   | 19  | European         | 0.96        | 0.0768      |
| CABLES1 | chr18 | 23253742 | rs754727784        | A    | T | 2   | 0   | 2   | European         | 1           | 0           |
| CABLES1 | chr18 | 23253745 | rs573079087        | C    | T | 2   | 2   | 0   | European         | 0.5         | 0.5         |
| CABLES1 | chr18 | 23253746 | rs201279640        | G    | A | 5   | 3   | 2   | European         | 0.8         | 0.32        |
| CABLES1 | chr18 | 23253781 | chr18_23253781_C_T | C    | T | 2   | 0   | 2   | European         | 1           | 0           |
| CABLES1 | chr18 | 23253782 | chr18_23253782_C_G | C    | G | 2   | 0   | 2   | South Asian      | 1           | 0           |
| CABLES1 | chr18 | 23253802 | rs200360924        | G    | A | 5   | 1   | 4   | European         | 0.6         | 0.48        |
| CABLES1 | chr18 | 23253820 | rs758005604        | G    | A | 5   | 1   | 4   | European         | 0.8         | 0.32        |
| CABLES1 | chr18 | 23253916 | rs768447551        | G    | A | 2   | 1   | 1   | European         | 1           | 0           |
| CABLES1 | chr18 | 23253918 | chr18_23253918_A_C | A    | C | 2   | 0   | 2   | African American | 1           | 0           |
| CABLES1 | chr18 | 23257320 | rs371602566        | G    | A | 2   | 0   | 2   | African American | 0.5         | 0.5         |
| CABLES1 | chr18 | 23257326 | rs746942462        | G    | A | 3   | 1   | 2   | East Asian       | 1           | 0           |
| CABLES1 | chr18 | 23257340 | rs562569128        | C    | A | 3   | 0   | 3   | South Asian      | 1           | 0           |

|         |       |          |                      |          |     |     |     |     |                  |             |             |
|---------|-------|----------|----------------------|----------|-----|-----|-----|-----|------------------|-------------|-------------|
| CABLES1 | chr18 | 23257348 | rs762629061          | G        | A   | 3   | 2   | 1   | European         | 1           | 0           |
| MFSD12  | chr19 | 3544728  | rs1400519167         | GT       | G   | 2   | 1   | 1   | European         | 0.5         | 0.5         |
| MFSD12  | chr19 | 3544815  | rs770546269          | G        | A   | 2   | 0   | 2   | Latin American 1 | 0.5         | 0.5         |
| MFSD12  | chr19 | 3546315  | rs757747148          | GCCAGCAC | G   | 4   | 2   | 2   | European         | 0.75        | 0.375       |
| MFSD12  | chr19 | 3547917  | rs1491401221         | CAG      | C   | 40  | 15  | 25  | European         | 0.825       | 0.31        |
| MFSD12  | chr19 | 3551122  | rs756636704          | TC       | T   | 2   | 2   | 0   | European         | 0.5         | 0.5         |
| MFSD12  | chr19 | 3551141  | rs780733101          | AG       | A   | 3   | 0   | 3   | European         | 1           | 0           |
| MFSD12  | chr19 | 3557402  | chr19_3557402_A_C    | A        | C   | 447 | 55  | 392 | European         | 0.608501119 | 0.568302729 |
| MFSD12  | chr19 | 3557403  | rs1477524629         | T        | C   | 4   | 2   | 2   | European         | 1           | 0           |
| MFSD12  | chr19 | 3557403  | chr19_3557403_T_A    | T        | A   | 52  | 4   | 48  | European         | 0.711538462 | 0.468195266 |
| MFSD12  | chr19 | 3557403  | chr19_3557403_T_G    | T        | G   | 49  | 6   | 43  | European         | 0.591836735 | 0.586422324 |
| CBLC    | chr19 | 44780891 | rs1441956114         | G        | A   | 2   | 0   | 2   | Latin American 2 | 1           | 0           |
| CBLC    | chr19 | 44781200 | rs202052679          | C        | T   | 25  | 13  | 12  | East Asian       | 1           | 0           |
| CBLC    | chr19 | 44781370 | rs80168591           | G        | A   | 735 | 354 | 381 | European         | 0.859863946 | 0.254068212 |
| CBLC    | chr19 | 44782359 | rs1422755026         | C        | T   | 2   | 1   | 1   | European         | 1           | 0           |
| CBLC    | chr19 | 44784252 | rs770497669          | C        | G   | 3   | 0   | 3   | South Asian      | 1           | 0           |
| CBLC    | chr19 | 44784256 | rs142402664          | C        | T   | 62  | 24  | 38  | African American | 0.548387097 | 0.588969823 |
| CBLC    | chr19 | 44789991 | rs761515082          | T        | C   | 2   | 0   | 2   | Latin American 2 | 0.5         | 0.5         |
| CBLC    | chr19 | 44789999 | rs202100625          | C        | G   | 52  | 16  | 36  | European         | 0.442307692 | 0.647189349 |
| CBLC    | chr19 | 44792381 | rs376434724          | A        | G   | 2   | 1   | 1   | African American | 1           | 0           |
| CBLC    | chr19 | 44793459 | rs374104325          | C        | G   | 3   | 1   | 2   | European         | 1           | 0           |
| CBLC    | chr19 | 44793459 | chr19_44793459_C_A   | C        | A   | 3   | 1   | 2   | Native American  | 0.666666667 | 0.444444444 |
| CBLC    | chr19 | 44793461 | rs200336706          | C        | G   | 104 | 31  | 73  | European         | 0.836538462 | 0.288091716 |
| CBLC    | chr19 | 44793461 | chr19_44793461_C_T   | C        | T   | 5   | 3   | 2   | South Asian      | 0.4         | 0.72        |
| CBLC    | chr19 | 44793462 | rs370828809          | G        | A   | 8   | 3   | 5   | European         | 0.75        | 0.40625     |
| CBLC    | chr19 | 44793467 | rs543773390          | C        | T   | 2   | 1   | 1   | Latin American 2 | 0.5         | 0.5         |
| CBLC    | chr19 | 44794192 | rs1041110421         | G        | A   | 2   | 1   | 1   | Latin American 1 | 1           | 0           |
| CBLC    | chr19 | 44794193 | chr19_44794193_T_TG  | T        | TG  | 711 | 258 | 453 | East Asian       | 0.428973277 | 0.731217892 |
| CBLC    | chr19 | 44794193 | chr19_44794193_T_TCC | T        | TCC | 3   | 2   | 1   | African American | 1           | 0           |
| CBLC    | chr19 | 44794201 | rs537580232          | C        | T   | 13  | 1   | 12  | South Asian      | 0.923076923 | 0.142011834 |
| CBLC    | chr19 | 44800371 | rs755514112          | TC       | T   | 2   | 1   | 1   | African American | 1           | 0           |
| CBLC    | chr19 | 44800455 | rs773153802          | G        | A   | 2   | 1   | 1   | European         | 1           | 0           |
| CBLC    | chr19 | 44800543 | rs193110123          | G        | A   | 20  | 2   | 18  | African American | 0.55        | 0.595       |
| CBLC    | chr19 | 44800547 | rs952247176          | A        | G   | 2   | 1   | 1   | African American | 0.5         | 0.5         |
| KCNC3   | chr19 | 50320269 | rs962219846          | C        | T   | 4   | 0   | 4   | South Asian      | 0.75        | 0.375       |
| KCNC3   | chr19 | 50320275 | rs1365532889         | C        | T   | 4   | 0   | 4   | European         | 1           | 0           |
| KCNC3   | chr19 | 50320277 | chr19_50320277_T_A   | T        | A   | 2   | 2   | 0   | Latin American 1 | 1           | 0           |
| KCNC3   | chr19 | 50320277 | chr19_50320277_T_G   | T        | G   | 30  | 4   | 26  | European         | 0.433333333 | 0.724444444 |
| KCNC3   | chr19 | 50320284 | rs958323371          | C        | T   | 2   | 1   | 1   | European         | 1           | 0           |
| KCNC3   | chr19 | 50320296 | rs781742486          | T        | A   | 2   | 0   | 2   | South Asian      | 1           | 0           |
| KCNC3   | chr19 | 50320320 | rs865957487          | C        | T   | 15  | 5   | 10  | African American | 0.733333333 | 0.435555556 |
| KCNC3   | chr19 | 50320323 | rs756181510          | G        | T   | 10  | 4   | 6   | African American | 0.3         | 0.74        |
| KCNC3   | chr19 | 50320328 | rs745593502          | G        | A   | 3   | 0   | 3   | Latin American 2 | 0.666666667 | 0.444444444 |
| KCNC3   | chr19 | 50320338 | rs1427121470         | G        | A   | 2   | 0   | 2   | European         | 1           | 0           |
| KCNC3   | chr19 | 50320598 | rs1256051209         | C        | T   | 3   | 2   | 1   | European         | 0.666666667 | 0.444444444 |
| KCNC3   | chr19 | 50320656 | rs141194974          | G        | A   | 13  | 6   | 7   | Latin American 1 | 0.846153846 | 0.272189349 |

|       |       |          |                    |            |   |     |    |     |                  |             |             |
|-------|-------|----------|--------------------|------------|---|-----|----|-----|------------------|-------------|-------------|
| KCNC3 | chr19 | 50320658 | rs750611092        | C          | A | 5   | 2  | 3   | East Asian       | 1           | 0           |
| KCNC3 | chr19 | 50320664 | rs758667095        | C          | T | 2   | 1  | 1   | Latin American 1 | 0.5         | 0.5         |
| KCNC3 | chr19 | 50320665 | rs779810264        | G          | A | 3   | 0  | 3   | African American | 0.333333333 | 0.666666667 |
| KCNC3 | chr19 | 50320670 | rs144957827        | C          | T | 129 | 37 | 92  | African American | 0.612403101 | 0.573523226 |
| KCNC3 | chr19 | 50320670 | chr19_50320670_C_A | C          | A | 2   | 0  | 2   | European         | 0.5         | 0.5         |
| KCNC3 | chr19 | 50320731 | rs1288206302       | G          | C | 2   | 0  | 2   | European         | 1           | 0           |
| KCNC3 | chr19 | 50320751 | rs151154830        | G          | A | 2   | 1  | 1   | European         | 0.5         | 0.5         |
| KCNC3 | chr19 | 50320763 | rs748015812        | G          | A | 2   | 0  | 2   | European         | 0.5         | 0.5         |
| KCNC3 | chr19 | 50320772 | rs199833067        | T          | C | 5   | 1  | 4   | European         | 0.4         | 0.72        |
| KCNC3 | chr19 | 50322981 | rs755973472        | G          | A | 2   | 0  | 2   | South Asian      | 1           | 0           |
| KCNC3 | chr19 | 50323013 | rs375737637        | G          | A | 2   | 0  | 2   | African American | 0.5         | 0.5         |
| KCNC3 | chr19 | 50323026 | rs778523009        | C          | T | 9   | 2  | 7   | Latin American 1 | 0.888888889 | 0.197530864 |
| KCNC3 | chr19 | 50323029 | rs969082050        | G          | C | 2   | 1  | 1   | African American | 1           | 0           |
| KCNC3 | chr19 | 50323070 | rs927538730        | G          | A | 16  | 4  | 12  | Latin American 1 | 0.625       | 0.5625      |
| KCNC3 | chr19 | 50323073 | rs962552787        | C          | A | 4   | 1  | 3   | African American | 0.5         | 0.625       |
| KCNC3 | chr19 | 50323076 | rs953932117        | C          | A | 3   | 1  | 2   | European         | 1           | 0           |
| KCNC3 | chr19 | 50323076 | chr19_50323076_C_G | C          | G | 3   | 0  | 3   | Latin American 1 | 0.666666667 | 0.444444444 |
| KCNC3 | chr19 | 50323077 | rs368232448        | C          | G | 4   | 1  | 3   | South Asian      | 0.5         | 0.625       |
| KCNC3 | chr19 | 50323078 | rs537912602        | C          | G | 5   | 1  | 4   | East Asian       | 0.4         | 0.72        |
| KCNC3 | chr19 | 50323078 | chr19_50323078_C_A | C          | A | 5   | 4  | 1   | European         | 1           | 0           |
| KCNC3 | chr19 | 50323140 | chr19_50323140_T_G | T          | G | 55  | 9  | 46  | African American | 0.327272727 | 0.739173554 |
| KCNC3 | chr19 | 50323155 | chr19_50323155_T_G | T          | G | 13  | 2  | 11  | European         | 0.384615385 | 0.733727811 |
| KCNC3 | chr19 | 50323158 | rs1047320973       | G          | C | 2   | 1  | 1   | European         | 0.5         | 0.5         |
| KCNC3 | chr19 | 50323166 | rs948853005        | G          | A | 2   | 1  | 1   | Latin American 2 | 0.5         | 0.5         |
| KCNC3 | chr19 | 50323179 | rs568711737        | C          | T | 14  | 4  | 10  | European         | 0.642857143 | 0.520408163 |
| KCNC3 | chr19 | 50323182 | rs549394447        | T          | C | 253 | 79 | 174 | European         | 0.849802372 | 0.268930932 |
| KCNC3 | chr19 | 50323193 | rs554197864        | G          | A | 20  | 5  | 15  | European         | 0.75        | 0.395       |
| KCNC3 | chr19 | 50323198 | rs772002798        | GGGCGGGGGT | G | 6   | 3  | 3   | European         | 0.833333333 | 0.277777778 |
| KCNC3 | chr19 | 50323202 | rs1034583217       | G          | A | 3   | 1  | 2   | European         | 1           | 0           |
| KCNC3 | chr19 | 50323206 | rs779708839        | G          | A | 2   | 2  | 0   | European         | 1           | 0           |
| KCNC3 | chr19 | 50323234 | rs572684513        | G          | C | 13  | 0  | 13  | South Asian      | 1           | 0           |
| KCNC3 | chr19 | 50323247 | rs558106649        | G          | A | 11  | 4  | 7   | European         | 0.636363636 | 0.52892562  |
| KCNC3 | chr19 | 50323253 | rs763961794        | G          | A | 4   | 0  | 4   | African American | 0.75        | 0.375       |
| KCNC3 | chr19 | 50323257 | rs761652328        | G          | A | 2   | 0  | 2   | European         | 1           | 0           |
| KCNC3 | chr19 | 50323259 | rs765155263        | C          | T | 2   | 0  | 2   | East Asian       | 0.5         | 0.5         |
| KCNC3 | chr19 | 50323268 | rs778103042        | T          | C | 2   | 1  | 1   | European         | 1           | 0           |
| KCNC3 | chr19 | 50323500 | chr19_50323500_T_A | T          | A | 2   | 1  | 1   | Latin American 1 | 1           | 0           |
| KCNC3 | chr19 | 50323524 | rs148033381        | C          | T | 16  | 4  | 12  | European         | 0.6875      | 0.4921875   |
| KCNC3 | chr19 | 50323530 | rs201391312        | C          | T | 3   | 0  | 3   | European         | 0.666666667 | 0.444444444 |
| KCNC3 | chr19 | 50323659 | rs766890044        | C          | T | 3   | 1  | 2   | African American | 0.333333333 | 0.666666667 |
| KCNC3 | chr19 | 50323806 | rs771916263        | T          | C | 4   | 3  | 1   | Latin American 1 | 0.75        | 0.375       |
| KCNC3 | chr19 | 50323887 | rs199908446        | C          | T | 2   | 0  | 2   | European         | 1           | 0           |
| KCNC3 | chr19 | 50323902 | rs146613004        | C          | T | 3   | 0  | 3   | South Asian      | 0.666666667 | 0.444444444 |
| KCNC3 | chr19 | 50323935 | rs115351343        | C          | T | 10  | 3  | 7   | East Asian       | 0.8         | 0.34        |
| KCNC3 | chr19 | 50323970 | rs200905864        | G          | A | 4   | 1  | 3   | Latin American 1 | 0.75        | 0.375       |
| KCNC3 | chr19 | 50328279 | rs1015358035       | C          | A | 11  | 4  | 7   | European         | 1           | 0           |

|        |       |          |                    |   |            |     |     |     |                  |             |             |
|--------|-------|----------|--------------------|---|------------|-----|-----|-----|------------------|-------------|-------------|
| KCNC3  | chr19 | 50328284 | rs1168160936       | T | TGCCGCCCG  | 62  | 23  | 39  | European         | 0.516129032 | 0.611862643 |
| KCNC3  | chr19 | 50328284 | rs764571894        | T | TGCCGCCCG  | 57  | 14  | 43  | East Asian       | 0.578947368 | 0.619883041 |
| KCNC3  | chr19 | 50328314 | rs1232558368       | G | T          | 3   | 0   | 3   | European         | 1           | 0           |
| KCNC3  | chr19 | 50328358 | rs986287142        | A | T          | 8   | 1   | 7   | Latin American 2 | 0.625       | 0.53125     |
| KCNC3  | chr19 | 50328383 | rs912072477        | C | A          | 4   | 1   | 3   | African American | 0.5         | 0.5         |
| KCNC3  | chr19 | 50328403 | rs1440589914       | T | A          | 2   | 1   | 1   | European         | 1           | 0           |
| KCNC3  | chr19 | 50328432 | rs767902914        | T | TGCGGCGTTG | 12  | 7   | 5   | Latin American 1 | 0.583333333 | 0.611111111 |
| KCNC3  | chr19 | 50328432 | rs757605455        | T | TGCGGCGTT  | 4   | 1   | 3   | European         | 0.5         | 0.625       |
| KCNC3  | chr19 | 50328434 | rs373416318        | C | T          | 122 | 44  | 78  | Latin American 1 | 0.459016393 | 0.580354743 |
| KCNC3  | chr19 | 50328477 | rs375782591        | G | C          | 8   | 2   | 6   | European         | 0.75        | 0.40625     |
| KCNC3  | chr19 | 50328818 | rs1238610331       | T | TGCCGCTGT  | 3   | 0   | 3   | AFR              | 0.666666667 | 0.444444444 |
| KCNC3  | chr19 | 50328854 | chr19_50328854_T_G | T | G          | 121 | 23  | 98  | European         | 0.314049587 | 0.771531999 |
| KCNC3  | chr19 | 50328878 | chr19_50328878_A_C | A | C          | 120 | 20  | 100 | European         | 0.541666667 | 0.621388889 |
| KCNC3  | chr19 | 50328905 | chr19_50328905_C_A | C | A          | 2   | 2   | 0   | African American | 0.5         | 0.5         |
| KCNC3  | chr19 | 50328907 | rs1425722679       | C | T          | 3   | 2   | 1   | East Asian       | 1           | 0           |
| KCNC3  | chr19 | 50328928 | rs990091211        | G | A          | 2   | 0   | 2   | European         | 1           | 0           |
| KCNC3  | chr19 | 50328932 | chr19_50328932_A_C | A | C          | 308 | 52  | 256 | European         | 0.477272727 | 0.689913982 |
| KCNC3  | chr19 | 50328955 | rs1046026073       | G | GGCTGCT    | 4   | 0   | 4   | African American | 1           | 0           |
| KCNC3  | chr19 | 50328956 | rs928573902        | G | A          | 52  | 12  | 40  | African American | 0.615384615 | 0.535502959 |
| KCNC3  | chr19 | 50328961 | rs1036902669       | T | A          | 3   | 1   | 2   | African American | 1           | 0           |
| KCNC3  | chr19 | 50328967 | rs991851074        | T | TGCGGCGGCA | 12  | 3   | 9   | African American | 0.583333333 | 0.486111111 |
| KCNC3  | chr19 | 50328967 | rs1403069648       | T | G          | 5   | 1   | 4   | Latin American 1 | 0.4         | 0.64        |
| KCNC3  | chr19 | 50329009 | rs1455735125       | G | A          | 2   | 1   | 1   | European         | 1           | 0           |
| KCNC3  | chr19 | 50329012 | rs775818633        | G | A          | 21  | 6   | 15  | East Asian       | 0.523809524 | 0.498866213 |
| KCNC3  | chr19 | 50329040 | chr19_50329040_C_T | C | T          | 2   | 0   | 2   | European         | 0.5         | 0.5         |
| KCNC3  | chr19 | 50329049 | rs1326942763       | C | A          | 3   | 0   | 3   | Latin American 2 | 0.666666667 | 0.444444444 |
| KCNC3  | chr19 | 50329060 | rs761806977        | G | C          | 10  | 5   | 5   | East Asian       | 0.8         | 0.32        |
| KCNC3  | chr19 | 50329060 | chr19_50329060_G_A | G | A          | 4   | 1   | 3   | European         | 0.5         | 0.5         |
| KCNC3  | chr19 | 50329067 | rs969993818        | A | T          | 4   | 2   | 2   | African American | 0.75        | 0.375       |
| KIF16B | chr20 | 16273260 | chr20_16273260_G_A | G | A          | 2   | 1   | 1   | East Asian       | 0.5         | 0.5         |
| KIF16B | chr20 | 16273264 | rs192942360        | C | T          | 18  | 6   | 12  | European         | 0.888888889 | 0.203703704 |
| KIF16B | chr20 | 16273308 | chr20_16273308_A_G | A | G          | 2   | 0   | 2   | Latin American 1 | 1           | 0           |
| KIF16B | chr20 | 16273345 | rs759560151        | C | G          | 3   | 0   | 3   | Latin American 2 | 0.666666667 | 0.444444444 |
| KIF16B | chr20 | 16273347 | rs377023426        | T | C          | 4   | 1   | 3   | African American | 1           | 0           |
| KIF16B | chr20 | 16273365 | chr20_16273365_G_A | G | A          | 2   | 0   | 2   | European         | 1           | 0           |
| KIF16B | chr20 | 16273372 | rs369549554        | C | T          | 8   | 4   | 4   | European         | 0.875       | 0.21875     |
| KIF16B | chr20 | 16312366 | rs201416098        | C | T          | 25  | 7   | 18  | Latin American 2 | 0.6         | 0.5472      |
| KIF16B | chr20 | 16312367 | rs180803641        | G | A          | 2   | 1   | 1   | European         | 1           | 0           |
| KIF16B | chr20 | 16335931 | chr20_16335931_C_A | C | A          | 134 | 24  | 110 | European         | 0.589552239 | 0.601358877 |
| KIF16B | chr20 | 16335935 | chr20_16335935_C_A | C | A          | 28  | 4   | 24  | European         | 0.464285714 | 0.655612245 |
| KIF16B | chr20 | 16335944 | chr20_16335944_C_A | C | A          | 172 | 24  | 148 | European         | 0.569767442 | 0.59917523  |
| KIF16B | chr20 | 16335946 | chr20_16335946_A_T | A | T          | 291 | 39  | 252 | European         | 0.639175258 | 0.54460859  |
| KIF16B | chr20 | 16335948 | chr20_16335948_G_T | G | T          | 461 | 57  | 404 | European         | 0.546637744 | 0.596552811 |
| KIF16B | chr20 | 16335951 | rs201535067        | T | C          | 12  | 1   | 11  | European         | 0.75        | 0.402777778 |
| KIF16B | chr20 | 16335956 | chr20_16335956_C_A | C | A          | 542 | 103 | 439 | European         | 0.54797048  | 0.629975082 |
| KIF16B | chr20 | 16335963 | rs151020283        | C | T          | 2   | 2   | 0   | East Asian       | 0.5         | 0.5         |

|        |       |          |                    |      |   |     |     |     |                  |             |             |
|--------|-------|----------|--------------------|------|---|-----|-----|-----|------------------|-------------|-------------|
| KIF16B | chr20 | 16335978 | rs368296500        | C    | T | 2   | 0   | 2   | South Asian      | 1           | 0           |
| KIF16B | chr20 | 16335979 | rs757038722        | G    | A | 3   | 1   | 2   | European         | 0.666666667 | 0.444444444 |
| KIF16B | chr20 | 16356344 | rs151286081        | C    | T | 2   | 0   | 2   | European         | 1           | 0           |
| KIF16B | chr20 | 16356353 | rs200695292        | C    | A | 14  | 6   | 8   | European         | 0.785714286 | 0.357142857 |
| KIF16B | chr20 | 16356377 | rs746166094        | C    | T | 3   | 1   | 2   | European         | 0.666666667 | 0.444444444 |
| KIF16B | chr20 | 16356401 | rs140491944        | T    | C | 8   | 2   | 6   | Latin American 1 | 0.5         | 0.59375     |
| KIF16B | chr20 | 16356416 | rs760344759        | C    | T | 2   | 0   | 2   | European         | 1           | 0           |
| KIF16B | chr20 | 16356451 | rs146992148        | C    | T | 5   | 0   | 5   | European         | 0.6         | 0.56        |
| KIF16B | chr20 | 16370602 | rs199899627        | C    | T | 2   | 0   | 2   | European         | 0.5         | 0.5         |
| KIF16B | chr20 | 16371672 | rs749011870        | G    | A | 3   | 1   | 2   | African American | 0.666666667 | 0.444444444 |
| KIF16B | chr20 | 16371693 | rs547335822        | C    | G | 8   | 0   | 8   | South Asian      | 1           | 0           |
| KIF16B | chr20 | 16371699 | rs75989969         | C    | T | 538 | 152 | 386 | African American | 0.526022305 | 0.61992648  |
| KIF16B | chr20 | 16371708 | rs766313563        | C    | T | 10  | 5   | 5   | Latin American 1 | 0.4         | 0.7         |
| KIF16B | chr20 | 16371718 | rs375035068        | C    | T | 3   | 1   | 2   | Latin American 2 | 1           | 0           |
| KIF16B | chr20 | 16371726 | rs538666717        | C    | T | 5   | 0   | 5   | South Asian      | 0.8         | 0.32        |
| KIF16B | chr20 | 16371735 | rs752147583        | ACTT | A | 4   | 1   | 3   | European         | 0.5         | 0.625       |
| KIF16B | chr20 | 16374284 | rs574827319        | G    | A | 2   | 0   | 2   | Latin American 1 | 0.5         | 0.5         |
| KIF16B | chr20 | 16374321 | rs766857702        | C    | T | 2   | 0   | 2   | East Asian       | 1           | 0           |
| KIF16B | chr20 | 16374341 | rs1374373925       | T    | C | 4   | 1   | 3   | Latin American 1 | 0.75        | 0.375       |
| KIF16B | chr20 | 16374363 | rs199625497        | C    | T | 7   | 2   | 5   | Latin American 1 | 0.857142857 | 0.244897959 |
| KIF16B | chr20 | 16378827 | rs117138500        | C    | T | 149 | 46  | 103 | European         | 0.590604027 | 0.53195802  |
| KIF16B | chr20 | 16378839 | rs763578972        | C    | A | 3   | 2   | 1   | European         | 0.333333333 | 0.666666667 |
| KIF16B | chr20 | 16378904 | rs139711574        | C    | G | 19  | 5   | 14  | European         | 0.631578947 | 0.520775623 |
| KIF16B | chr20 | 16378913 | rs769134052        | T    | C | 4   | 0   | 4   | African American | 0.5         | 0.625       |
| KIF16B | chr20 | 16378916 | rs144357521        | A    | G | 3   | 0   | 3   | Latin American 1 | 0.666666667 | 0.444444444 |
| KIF16B | chr20 | 16378923 | rs200924465        | T    | G | 4   | 2   | 2   | European         | 0.75        | 0.375       |
| KIF16B | chr20 | 16378931 | rs139982271        | G    | A | 11  | 1   | 10  | Latin American 2 | 0.545454545 | 0.495867769 |
| KIF16B | chr20 | 16378937 | rs34336583         | T    | C | 187 | 56  | 131 | African American | 0.470588235 | 0.630100947 |
| KIF16B | chr20 | 16378940 | rs145699653        | C    | T | 2   | 1   | 1   | African American | 1           | 0           |
| KIF16B | chr20 | 16378949 | rs148922354        | G    | A | 3   | 2   | 1   | European         | 0.666666667 | 0.444444444 |
| KIF16B | chr20 | 16378957 | rs755997794        | TCTC | T | 9   | 2   | 7   | African American | 0.777777778 | 0.345679012 |
| KIF16B | chr20 | 16378982 | rs61754557         | C    | T | 15  | 6   | 9   | European         | 0.8         | 0.337777778 |
| KIF16B | chr20 | 16379056 | rs147568857        | C    | G | 4   | 3   | 1   | East Asian       | 1           | 0           |
| KIF16B | chr20 | 16379060 | rs371455061        | C    | T | 2   | 0   | 2   | African American | 0.5         | 0.5         |
| KIF16B | chr20 | 16379075 | rs189051335        | G    | A | 5   | 2   | 3   | East Asian       | 1           | 0           |
| KIF16B | chr20 | 16379088 | rs758672557        | T    | C | 2   | 0   | 2   | AFR              | 0.5         | 0.5         |
| KIF16B | chr20 | 16379217 | chr20_16379217_C_G | C    | G | 2   | 2   | 0   | African American | 1           | 0           |
| KIF16B | chr20 | 16379282 | rs761663147        | C    | A | 2   | 1   | 1   | European         | 0.5         | 0.5         |
| KIF16B | chr20 | 16379325 | rs550614292        | C    | T | 12  | 1   | 11  | South Asian      | 0.666666667 | 0.486111111 |
| KIF16B | chr20 | 16379362 | rs749242997        | CTCA | C | 3   | 1   | 2   | East Asian       | 1           | 0           |
| KIF16B | chr20 | 16379390 | rs137926910        | T    | A | 11  | 3   | 8   | European         | 0.727272727 | 0.429752066 |
| KIF16B | chr20 | 16379405 | rs376214761        | C    | A | 2   | 0   | 2   | European         | 1           | 0           |
| KIF16B | chr20 | 16379416 | rs760399657        | C    | A | 5   | 3   | 2   | Latin American 2 | 0.6         | 0.48        |
| KIF16B | chr20 | 16379424 | rs200360811        | T    | C | 37  | 16  | 21  | European         | 0.513513514 | 0.600438276 |
| KIF16B | chr20 | 16379438 | rs201539410        | T    | C | 6   | 2   | 4   | European         | 0.333333333 | 0.722222222 |
| KIF16B | chr20 | 16379472 | rs142315776        | C    | T | 21  | 5   | 16  | African American | 0.476190476 | 0.634920635 |

|        |       |          |              |      |   |     |     |     |                  |             |             |
|--------|-------|----------|--------------|------|---|-----|-----|-----|------------------|-------------|-------------|
| KIF16B | chr20 | 16379523 | rs756461908  | C    | T | 2   | 1   | 1   | East Asian       | 1           | 0           |
| KIF16B | chr20 | 16379556 | rs139840756  | C    | T | 6   | 3   | 3   | European         | 1           | 0           |
| KIF16B | chr20 | 16379580 | rs148805920  | G    | T | 8   | 3   | 5   | Latin American 1 | 0.5         | 0.59375     |
| KIF16B | chr20 | 16379594 | rs753520192  | C    | T | 2   | 1   | 1   | African American | 0.5         | 0.5         |
| KIF16B | chr20 | 16379595 | rs117959133  | G    | A | 134 | 41  | 93  | European         | 0.835820896 | 0.291713076 |
| KIF16B | chr20 | 16379609 | rs764992161  | C    | T | 4   | 2   | 2   | Native American  | 0.5         | 0.625       |
| KIF16B | chr20 | 16379625 | rs147706374  | C    | G | 7   | 1   | 6   | European         | 0.857142857 | 0.244897959 |
| KIF16B | chr20 | 16379652 | rs774581914  | C    | A | 9   | 4   | 5   | Latin American 1 | 0.888888889 | 0.197530864 |
| KIF16B | chr20 | 16379660 | rs371878938  | C    | T | 7   | 1   | 6   | South Asian      | 0.571428571 | 0.612244898 |
| KIF16B | chr20 | 16379661 | rs142424331  | G    | A | 2   | 0   | 2   | Latin American 2 | 0.5         | 0.5         |
| KIF16B | chr20 | 16379664 | rs147795685  | G    | A | 20  | 6   | 14  | Latin American 1 | 0.55        | 0.63        |
| KIF16B | chr20 | 16379751 | rs573401957  | G    | T | 12  | 0   | 12  | South Asian      | 1           | 0           |
| KIF16B | chr20 | 16379765 | rs145554547  | A    | T | 15  | 7   | 8   | European         | 0.933333333 | 0.124444444 |
| KIF16B | chr20 | 16379790 | rs143610596  | C    | A | 22  | 13  | 9   | African American | 0.545454545 | 0.533057851 |
| KIF16B | chr20 | 16379792 | rs1450160704 | T    | C | 2   | 1   | 1   | European         | 1           | 0           |
| KIF16B | chr20 | 16379847 | rs1204335557 | CGTT | C | 2   | 2   | 0   | European         | 1           | 0           |
| KIF16B | chr20 | 16379870 | rs149204565  | C    | T | 29  | 7   | 22  | East Asian       | 0.793103448 | 0.340071344 |
| KIF16B | chr20 | 16379889 | rs368648376  | C    | T | 10  | 1   | 9   | African American | 0.5         | 0.64        |
| KIF16B | chr20 | 16379891 | rs758487171  | C    | T | 3   | 1   | 2   | South Asian      | 0.666666667 | 0.444444444 |
| KIF16B | chr20 | 16379941 | rs528292073  | C    | A | 11  | 1   | 10  | South Asian      | 0.727272727 | 0.429752066 |
| KIF16B | chr20 | 16379981 | rs543632299  | G    | A | 4   | 2   | 2   | European         | 0.75        | 0.375       |
| KIF16B | chr20 | 16380006 | rs905334142  | C    | T | 2   | 0   | 2   | AFR              | 0.5         | 0.5         |
| KIF16B | chr20 | 16380009 | rs112875458  | T    | C | 310 | 92  | 218 | European         | 0.777419355 | 0.377565036 |
| KIF16B | chr20 | 16380020 | rs368432617  | C    | T | 4   | 1   | 3   | European         | 0.75        | 0.375       |
| KIF16B | chr20 | 16380023 | rs138901840  | C    | T | 13  | 7   | 6   | African American | 0.615384615 | 0.568047337 |
| KIF16B | chr20 | 16380024 | rs751854805  | G    | A | 4   | 2   | 2   | African American | 0.5         | 0.625       |
| KIF16B | chr20 | 16380080 | rs747897403  | C    | T | 2   | 1   | 1   | European         | 1           | 0           |
| KIF16B | chr20 | 16380081 | rs202192407  | G    | T | 4   | 2   | 2   | European         | 1           | 0           |
| KIF16B | chr20 | 16380090 | rs202146908  | C    | T | 9   | 7   | 2   | East Asian       | 1           | 0           |
| KIF16B | chr20 | 16380107 | rs144842801  | C    | A | 4   | 1   | 3   | European         | 0.75        | 0.375       |
| KIF16B | chr20 | 16380120 | rs201610127  | C    | T | 5   | 3   | 2   | European         | 1           | 0           |
| KIF16B | chr20 | 16381725 | rs145387817  | G    | A | 5   | 2   | 3   | European         | 1           | 0           |
| KIF16B | chr20 | 16404835 | rs747917424  | C    | A | 2   | 0   | 2   | Latin American 2 | 0.5         | 0.5         |
| KIF16B | chr20 | 16404843 | rs114232301  | T    | G | 146 | 36  | 110 | African American | 0.493150685 | 0.603584162 |
| KIF16B | chr20 | 16404849 | rs144884167  | C    | T | 458 | 116 | 342 | Latin American 2 | 0.312227074 | 0.780038519 |
| KIF16B | chr20 | 16404873 | rs767830256  | G    | C | 2   | 0   | 2   | South Asian      | 1           | 0           |
| KIF16B | chr20 | 16406420 | rs779028870  | C    | T | 2   | 0   | 2   | African American | 1           | 0           |
| KIF16B | chr20 | 16406453 | rs752199324  | G    | A | 3   | 0   | 3   | South Asian      | 1           | 0           |
| KIF16B | chr20 | 16427109 | rs751454373  | T    | A | 2   | 0   | 2   | Latin American 2 | 1           | 0           |
| KIF16B | chr20 | 16427128 | rs193920855  | C    | T | 2   | 0   | 2   | Latin American 1 | 0.5         | 0.5         |
| KIF16B | chr20 | 16427139 | rs777979045  | C    | T | 2   | 0   | 2   | African American | 1           | 0           |
| KIF16B | chr20 | 16427191 | rs149918620  | C    | T | 20  | 6   | 14  | European         | 0.7         | 0.485       |
| KIF16B | chr20 | 16427230 | rs773090309  | G    | A | 4   | 0   | 4   | South Asian      | 1           | 0           |
| KIF16B | chr20 | 16428967 | rs751782461  | G    | A | 2   | 2   | 0   | European         | 0.5         | 0.5         |
| KIF16B | chr20 | 16428985 | rs144621795  | C    | T | 45  | 14  | 31  | European         | 0.488888889 | 0.521481481 |
| KIF16B | chr20 | 16429873 | rs991694607  | T    | C | 2   | 1   | 1   | AFR              | 0.5         | 0.5         |

|        |       |          |                    |   |   |     |     |     |                  |             |             |
|--------|-------|----------|--------------------|---|---|-----|-----|-----|------------------|-------------|-------------|
| KIF16B | chr20 | 16497677 | rs533883686        | A | T | 3   | 3   | 0   | Latin American 1 | 1           | 0           |
| KIF16B | chr20 | 16504386 | rs376617237        | C | T | 4   | 2   | 2   | European         | 1           | 0           |
| KIF16B | chr20 | 16504394 | rs369831714        | G | A | 3   | 0   | 3   | African American | 1           | 0           |
| KIF16B | chr20 | 16504406 | chr20_16504406_G_A | G | A | 3   | 0   | 3   | Latin American 1 | 1           | 0           |
| KIF16B | chr20 | 16504418 | rs182061575        | C | T | 4   | 3   | 1   | European         | 1           | 0           |
| KIF16B | chr20 | 16504508 | rs143503908        | C | T | 14  | 5   | 9   | European         | 0.857142857 | 0.244897959 |
| KIF16B | chr20 | 16504539 | rs570220794        | G | A | 4   | 2   | 2   | Latin American 1 | 0.5         | 0.625       |
| KIF16B | chr20 | 16505800 | rs373271206        | C | T | 2   | 2   | 0   | European         | 1           | 0           |
| KIF16B | chr20 | 16505829 | rs1304049887       | T | C | 2   | 0   | 2   | European         | 1           | 0           |
| KIF16B | chr20 | 16506037 | rs371216686        | C | T | 2   | 1   | 1   | African American | 0.5         | 0.5         |
| KIF16B | chr20 | 16506103 | rs776485491        | C | T | 2   | 1   | 1   | European         | 1           | 0           |
| KIF16B | chr20 | 16506127 | rs767345387        | C | T | 2   | 0   | 2   | European         | 1           | 0           |
| KIF16B | chr20 | 16506157 | rs377708134        | C | T | 4   | 2   | 2   | European         | 0.5         | 0.625       |
| KIF16B | chr20 | 16506168 | rs1182328391       | G | C | 2   | 0   | 2   | AFR              | 1           | 0           |
| KIF16B | chr20 | 16508016 | rs1456362492       | G | T | 3   | 0   | 3   | European         | 1           | 0           |
| KIF16B | chr20 | 16508020 | rs920742631        | C | T | 3   | 2   | 1   | African American | 1           | 0           |
| KIF16B | chr20 | 16508031 | rs778008000        | C | T | 4   | 1   | 3   | South Asian      | 0.5         | 0.625       |
| KIF16B | chr20 | 16508032 | rs747079263        | G | A | 4   | 1   | 3   | East Asian       | 1           | 0           |
| KIF16B | chr20 | 16508040 | rs760097544        | T | C | 2   | 0   | 2   | African American | 1           | 0           |
| KIF16B | chr20 | 16508065 | rs144734414        | C | T | 2   | 1   | 1   | African American | 1           | 0           |
| KIF16B | chr20 | 16508083 | rs749939448        | C | T | 2   | 1   | 1   | European         | 1           | 0           |
| KIF16B | chr20 | 16508100 | rs555338627        | T | C | 2   | 1   | 1   | East Asian       | 1           | 0           |
| KIF16B | chr20 | 16511472 | rs1322489935       | T | G | 3   | 0   | 3   | European         | 1           | 0           |
| KIF16B | chr20 | 16511483 | rs201934822        | C | T | 6   | 1   | 5   | European         | 0.666666667 | 0.5         |
| KIF16B | chr20 | 16511484 | rs772949909        | G | A | 3   | 1   | 2   | Native American  | 1           | 0           |
| KIF16B | chr20 | 16511487 | rs201732566        | G | A | 5   | 3   | 2   | European         | 0.8         | 0.32        |
| KIF16B | chr20 | 16511504 | rs775993785        | C | T | 6   | 2   | 4   | European         | 1           | 0           |
| KIF16B | chr20 | 16511505 | rs144864308        | G | A | 23  | 5   | 18  | Latin American 1 | 0.739130435 | 0.43100189  |
| KIF16B | chr20 | 16512875 | rs113456821        | T | C | 125 | 47  | 78  | African American | 0.592       | 0.550144    |
| KIF16B | chr20 | 16512877 | rs779575204        | C | G | 7   | 2   | 5   | Latin American 2 | 0.857142857 | 0.244897959 |
| KIF16B | chr20 | 16512878 | rs201128490        | G | A | 16  | 6   | 10  | European         | 0.875       | 0.21875     |
| KIF16B | chr20 | 16512886 | rs778333167        | A | G | 2   | 1   | 1   | European         | 0.5         | 0.5         |
| KIF16B | chr20 | 16512901 | rs1478305353       | C | T | 2   | 1   | 1   | African American | 0.5         | 0.5         |
| KIF16B | chr20 | 16512904 | rs199862057        | G | T | 6   | 1   | 5   | East Asian       | 1           | 0           |
| KIF16B | chr20 | 16515649 | rs377631501        | C | T | 8   | 1   | 7   | European         | 0.625       | 0.53125     |
| KIF16B | chr20 | 16515652 | rs146744592        | G | C | 13  | 3   | 10  | European         | 0.846153846 | 0.272189349 |
| KIF16B | chr20 | 16515654 | rs140237322        | G | A | 57  | 20  | 37  | European         | 0.438596491 | 0.603878116 |
| KIF16B | chr20 | 16515655 | rs557490936        | T | C | 2   | 0   | 2   | South Asian      | 1           | 0           |
| KIF16B | chr20 | 16526120 | rs774478907        | T | C | 2   | 0   | 2   | Latin American 2 | 0.5         | 0.5         |
| KIF16B | chr20 | 16526124 | rs184779220        | T | C | 33  | 12  | 21  | Latin American 1 | 0.727272727 | 0.438934803 |
| KIF16B | chr20 | 16526169 | rs565631879        | G | A | 12  | 2   | 10  | European         | 0.833333333 | 0.291666667 |
| KIF16B | chr20 | 16526193 | rs746814258        | C | T | 10  | 0   | 10  | South Asian      | 1           | 0           |
| KIF16B | chr20 | 16526202 | rs199569686        | G | T | 17  | 5   | 12  | European         | 0.764705882 | 0.387543253 |
| KIF16B | chr20 | 16528419 | rs773274569        | C | G | 3   | 0   | 3   | East Asian       | 1           | 0           |
| KIF16B | chr20 | 16573232 | rs185829984        | C | T | 331 | 124 | 207 | Latin American 1 | 0.36858006  | 0.740062614 |
| KIF16B | chr20 | 16573250 | rs766254525        | C | T | 3   | 0   | 3   | European         | 0.666666667 | 0.444444444 |

| Table S7 List of SNVs for coalescence analysis |           |           |             |            |       |      |           |                       |           |       |             |           |            |          |          |        |
|------------------------------------------------|-----------|-----------|-------------|------------|-------|------|-----------|-----------------------|-----------|-------|-------------|-----------|------------|----------|----------|--------|
| Position                                       | rsID      | Gene sym  | Effective A | Other Alle | AF    | OR   | CI        | P value               | Region    | in_R5 | R5_ID       | gwas_prox | pos_proxy  | A1_proxy | A2_proxy | R2     |
| 1:207629207                                    | rs4844610 | CR1       | A           | C          | 0.187 | 1.16 | 1.12–1.20 | $8.2 \times 10^{-16}$ | CR1       | TRUE  | rs4844610   | rs4844610 | 1:2076292  | A        | C        | 1      |
| 6:32607629                                     | rs9271058 | HLA-DRB1  | A           | T          | 0.27  | 1.1  | 1.06–1.14 | $5.1 \times 10^{-8}$  | HLA-DQA1  | TRUE  | rs9271058   | rs9271058 | 6:3260762  | A        | T        | 1      |
| 6:47463548                                     | rs9473117 | CD2AP     | C           | A          | 0.28  | 1.09 | 1.05–1.12 | $2.3 \times 10^{-7}$  | CD2AP     | TRUE  | rs9473117   | rs9473117 | 6:4746354  | C        | A        | 1      |
| 7:100494172                                    | rs1253917 | NYAP1     | T           | C          | 0.303 | 0.93 | 0.91–0.96 | $2.1 \times 10^{-5}$  | NYAP1_ZC  | TRUE  | rs12539172  | rs1253917 | 7:1004941  | T        | C        | 1      |
| 7:143402040                                    | rs1080802 | EPHA1     | A           | C          | 0.199 | 0.9  | 0.87–0.94 | $3.1 \times 10^{-8}$  | EPHA1_EPI | TRUE  | rs10808026  | rs1080802 | 7:1434020  | A        | C        | 1      |
| 8:27610169                                     | rs9331896 | CLU       | C           | T          | 0.387 | 0.88 | 0.85–0.91 | $3.6 \times 10^{-16}$ | CLU_PTK2B | TRUE  | rs9331896   | rs9331896 | 8:2761016  | C        | T        | 1      |
| 11:47358789                                    | rs3740688 | SPI1      | G           | T          | 0.448 | 0.91 | 0.89–0.94 | $9.7 \times 10^{-11}$ | SPI1      | TRUE  | rs3740688   | rs3740688 | 11:473587  | G        | T        | 1      |
| 11:60169453                                    | rs7933202 | MS4A2     | C           | A          | 0.391 | 0.89 | 0.86–0.92 | $2.2 \times 10^{-15}$ | MS4A2_MS  | TRUE  | rs7933202   | rs7933202 | 11:601694  | C        | A        | 1      |
| 14:92466484                                    | rs1288173 | SLC24A4   | C           | T          | 0.221 | 0.92 | 0.88–0.95 | $4.9 \times 10^{-7}$  | RIN3_SLC2 | TRUE  | rs12881735  | rs1288173 | 14:924664  | C        | T        | 1      |
| 19:1056493                                     | rs3752246 | ABCA7     | G           | C          | 0.182 | 1.13 | 1.09–1.18 | $6.6 \times 10^{-10}$ | ABCA7_KLF | FALSE |             | rs4147929 | chr19:1063 | A        | G        | 0.9509 |
| 19:44908684                                    | rs429358  | APOE      | C           | T          | 0.216 | 3.32 | 3.20–3.45 | $1.2 \times 10^{-88}$ | APOE      | TRUE  | rs429358    | rs429358  | 19:449086  | C        | T        | 1      |
| 20:56422512                                    | rs6024870 | CASS4     | A           | G          | 0.088 | 0.88 | 0.84–0.93 | $1.1 \times 10^{-6}$  | CASS4     | TRUE  | rs6024870   | rs6024870 | 20:564225  | A        | G        | 1      |
| 10:11678309                                    | rs7920721 | ECHDC3    | G           | A          | 0.389 | 1.08 | 1.05–1.11 | $1.9 \times 10^{-7}$  | ECHDC3_U  | TRUE  | rs7920721   | rs7920721 | 10:116783  | G        | A        | 1      |
| 17:63460787                                    | rs1381900 | ACE       | A           | G          | 0.02  | 1.29 | 1.15–1.44 | $7.5 \times 10^{-6}$  | ACE       | TRUE  | rs138190086 | rs1381900 | 17:634607  | A        | G        | 1      |
| 1:207577223                                    | rs679515  | CR1       | T           | C          | 0.188 | 1.13 | 1.11–1.15 | $7.2 \times 10^{-46}$ | CR1       | FALSE |             | rs1203784 | chr1:20751 | T        | G        | 0.9429 |
| 2:127135234                                    | rs6733839 | BIN1      | T           | C          | 0.389 | 1.17 | 1.16–1.19 | $6.1 \times 10^{-11}$ | BIN1      | TRUE  | rs6733839   | rs6733839 | 2:1271352  | T        | C        | 1      |
| 2:233117202                                    | rs1093343 | INPP5D    | G           | C          | 0.234 | 0.93 | 0.92–0.95 | $3.6 \times 10^{-18}$ | INPP5D    | TRUE  | rs10933431  | rs1093343 | 2:2331172  | G        | C        | 1      |
| 4:11023507                                     | rs6846529 | CLNK      | C           | T          | 0.283 | 1.07 | 1.05–1.08 | $2.2 \times 10^{-11}$ | CLNK      | TRUE  | rs6846529   | rs6846529 | 4:1102350  | C        | T        | 1      |
| 6:32615322                                     | rs6605556 | HLA-DQA1  | G           | A          | 0.161 | 0.91 | 0.90–0.93 | $7.1 \times 10^{-20}$ | HLA-DQA1  | FALSE |             | rs6941395 | chr6:32615 | A        | G        | 1      |
| 6:41036354                                     | rs1094794 | UNC5CL    | A           | G          | 0.142 | 0.94 | 0.93–0.96 | $1.1 \times 10^{-9}$  | TREM2_TR  | TRUE  | rs10947943  | rs1094794 | 6:4103635  | A        | G        | 1      |
| 6:41161469                                     | rs1433324 | TREM2     | T           | C          | 0.013 | 1.41 | 1.32–1.50 | $2.8 \times 10^{-25}$ | TREM2_TR  | TRUE  | rs143332484 | rs1433324 | 6:4116146  | T        | C        | 1      |
| 6:41161514                                     | rs7593262 | TREM2     | T           | C          | 0.003 | 2.39 | 2.09–2.73 | $2.5 \times 10^{-37}$ | TREM2_TR  | FALSE |             | rs1873706 | chr6:40974 | A        | G        | 1      |
| 6:41181270                                     | rs6075501 | TREML2    | G           | A          | 0.004 | 1.55 | 1.33–1.80 | $2.1 \times 10^{-8}$  | TREM2_TR  | TRUE  | rs60755019  | rs6075501 | 6:4118127  | G        | A        | 1      |
| 6:47517390                                     | rs7767350 | CD2AP     | T           | C          | 0.271 | 1.08 | 1.06–1.09 | $7.9 \times 10^{-22}$ | CD2AP     | TRUE  | rs7767350   | rs7767350 | 6:4751739  | T        | C        | 1      |
| 7:37844191                                     | rs6966331 | EPDR1     | T           | C          | 0.349 | 0.96 | 0.94–0.97 | $4.6 \times 10^{-10}$ | EPDR1     | FALSE |             | rs2167266 | chr7:37842 | C        | T        | 0.9315 |
| 7:100334426                                    | rs7384878 | ZCWPW1    | C           | T          | 0.31  | 0.92 | 0.91–0.94 | $1.1 \times 10^{-26}$ | NYAP1_ZC  | TRUE  | rs7384878   | rs7384878 | 7:1003344  | C        | T        | 1      |
| 7:143413669                                    | rs1177114 | EPHA1     | A           | G          | 0.348 | 0.95 | 0.93–0.96 | $3.3 \times 10^{-14}$ | EPHA1_EPI | TRUE  | rs11771145  | rs1177114 | 7:1434136  | A        | G        | 1      |
| 8:27362470                                     | rs7322343 | PTK2B     | T           | C          | 0.369 | 1.07 | 1.06–1.08 | $4.0 \times 10^{-23}$ | CLU_PTK2B | TRUE  | rs73223431  | rs7322343 | 8:2736247  | T        | C        | 1      |
| 8:27607795                                     | rs1178707 | CLU       | T           | C          | 0.392 | 0.91 | 0.90–0.92 | $1.7 \times 10^{-44}$ | CLU_PTK2B | TRUE  | rs11787077  | rs1178707 | 8:2760779  | T        | C        | 1      |
| 10:11676714                                    | rs7912495 | USP6NL/EC | G           | A          | 0.462 | 1.06 | 1.05–1.08 | $9.7 \times 10^{-19}$ | ECHDC3_U  | TRUE  | rs7912495   | rs7912495 | 10:116767  | G        | A        | 1      |
| 11:47370397                                    | rs1043765 | SPI1      | A           | G          | 0.399 | 1.06 | 1.04–1.07 | $5.3 \times 10^{-14}$ | SPI1      | TRUE  | rs10437655  | rs1043765 | 11:473703  | A        | G        | 1      |
| 11:60254475                                    | rs1582763 | MS4A4A    | A           | G          | 0.371 | 0.91 | 0.90–0.92 | $3.7 \times 10^{-42}$ | MS4A2_MS  | TRUE  | rs1582763   | rs1582763 | 11:602544  | A        | G        | 1      |
| 11:86157598                                    | rs3851179 | PICALM    | T           | C          | 0.358 | 0.9  | 0.89–0.92 | $3.0 \times 10^{-48}$ | PICALM    | FALSE |             | rs1079283 | chr11:8615 | A        | G        | 0.9797 |
| 11:121482368                                   | rs7468582 | SORL1     | G           | T          | 0.019 | 1.19 | 1.13–1.25 | $2.8 \times 10^{-11}$ | SORL1     | TRUE  | rs74685827  | rs7468582 | 11:121482  | G        | T        | 1      |
| 11:121564878                                   | rs1121834 | SORL1     | C           | T          | 0.039 | 0.84 | 0.81–0.87 | $1.4 \times 10^{-23}$ | SORL1     | TRUE  | rs11218343  | rs1121834 | 11:121564  | C        | T        | 1      |
| 14:52924962                                    | rs1712592 | FERMT2    | G           | A          | 0.089 | 1.1  | 1.07–1.12 | $8.3 \times 10^{-16}$ | FERMT2    | TRUE  | rs17125924  | rs1712592 | 14:529249  | G        | A        | 1      |
| 14:92464917                                    | rs7401792 | SLC24A4   | G           | A          | 0.371 | 1.04 | 1.02–1.05 | $4.8 \times 10^{-8}$  | RIN3_SLC2 | TRUE  | rs7401792   | rs7401792 | 14:924649  | G        | A        | 1      |
| 14:92472511                                    | rs1259065 | SLC24A4   | A           | G          | 0.328 | 0.93 | 0.92–0.95 | $4.2 \times 10^{-21}$ | RIN3_SLC2 | TRUE  | rs12590654  | rs1259065 | 14:924725  | A        | G        | 1      |
| 15:50701814                                    | rs8025980 | SPPL2A    | G           | A          | 0.345 | 0.96 | 0.94–0.97 | $1.3 \times 10^{-8}$  | SPPL2A    | TRUE  | rs8025980   | rs8025980 | 15:507018  | G        | A        | 1      |
| 15:58764824                                    | rs602602  | ADAM10    | A           | T          | 0.28  | 0.94 | 0.93–0.96 | $2.1 \times 10^{-15}$ | ADAM10    | TRUE  | rs602602    | rs602602  | 15:587648  | A        | T        | 1      |
| 15:63277703                                    | rs1176180 | APH1B     | T           | C          | 0.144 | 1.11 | 1.09–1.13 | $2.2 \times 10^{-25}$ | APH1B_SN  | TRUE  | rs117618017 | rs1176180 | 15:632777  | T        | C        | 1      |

|              |           |          |   |       |       |      |           |                         |           |       |             |           |            |    |    |        |
|--------------|-----------|----------|---|-------|-------|------|-----------|-------------------------|-----------|-------|-------------|-----------|------------|----|----|--------|
| 16:31111250  | rs889555  | BCKDK    | T | C     | 0.281 | 0.95 | 0.94-0.97 | 2.0 × 10 <sup>-11</sup> | BCKDK     | TRUE  | rs889555    | rs889555  | 16:311112  | T  | C  | 1      |
| 16:70660097  | rs4985556 | IL34     | A | C     | 0.115 | 1.07 | 1.05-1.09 | 6.0 × 10 <sup>-10</sup> | IL34      | TRUE  | rs4985556   | rs4985556 | 16:706600  | A  | C  | 1      |
| 16:81739398  | rs1244675 | PLCG2    | G | A     | 0.403 | 0.95 | 0.94-0.96 | 1.2 × 10 <sup>-13</sup> | PLCG2     | FALSE |             | rs1244418 | chr16:8173 | A  | G  | 0.8496 |
| 16:81908423  | rs7282490 | PLCG2    | G | C     | 0.008 | 0.74 | 0.68-0.81 | 8.5 × 10 <sup>-12</sup> | PLCG2     | FALSE |             | rs5571187 | chr16:8189 | C  | T  | 0.6486 |
| 17:5233752   | rs7225151 | SCIMP    | A | G     | 0.124 | 1.08 | 1.05-1.10 | 4.1 × 10 <sup>-13</sup> | RABEP1_SC | TRUE  | rs7225151   | rs7225151 | 17:523375  | A  | G  | 1      |
| 17:46779275  | rs199515  | WNT3     | G | C     | 0.219 | 0.94 | 0.93-0.96 | 9.3 × 10 <sup>-13</sup> | WNT3      | TRUE  | rs199515    | rs199515  | 17:467792  | G  | C  | 1      |
| 17:49219935  | rs616338  | ABI3     | T | C     | 0.012 | 1.32 | 1.23-1.42 | 2.8 × 10 <sup>-14</sup> | ABI3      | TRUE  | rs616338    | rs616338  | 17:492199  | T  | C  | 1      |
| 17:58332680  | rs2526377 | TSPOAP1  | G | A     | 0.445 | 0.95 | 0.94-0.97 | 1.6 × 10 <sup>-11</sup> | TSPOAP1_  | TRUE  | rs2526377   | rs2526377 | 17:583326  | G  | A  | 1      |
| 17:63471557  | rs4277405 | ACE      | C | T     | 0.384 | 0.94 | 0.93-0.95 | 8.8 × 10 <sup>-20</sup> | ACE       | TRUE  | rs4277405   | rs4277405 | 17:634715  | C  | T  | 1      |
| 19:1050875   | rs1215102 | ABCA7    | A | G     | 0.336 | 1.1  | 1.09-1.12 | 1.6 × 10 <sup>-31</sup> | ABCA7_KLF | TRUE  | rs12151021  | rs1215102 | 19:105087  | A  | G  | 1      |
| 20:56423488  | rs6014724 | CASS4    | G | A     | 0.09  | 0.89 | 0.87-0.91 | 4.1 × 10 <sup>-21</sup> | CASS4     | TRUE  | rs6014724   | rs6014724 | 20:564234  | G  | A  | 1      |
| 21:26775872  | rs2830489 | ADAMTS1  | T | C     | 0.281 | 0.95 | 0.94-0.97 | 1.7 × 10 <sup>-10</sup> | ADAMTS1_  | TRUE  | rs2830489   | rs2830489 | 21:267758  | T  | C  | 1      |
| 1:109345810  | rs1417496 | SORT1    | C | T     | 0.004 | 1.38 | 1.24-1.54 | 7.5 × 10 <sup>-9</sup>  | SORT1     | TRUE  | rs141749679 | rs1417496 | 1:1093458  | C  | T  | 1      |
| 2:9558882    | rs7277702 | ADAM17   | G | A     | 0.144 | 1.06 | 1.04-1.08 | 2.7 × 10 <sup>-8</sup>  | ADAM17    | TRUE  | rs72777026  | rs7277702 | 2:9558882  | G  | A  | 1      |
| 2:37304796   | rs1702049 | PRKD3    | C | T     | 0.145 | 1.06 | 1.04-1.08 | 3.3 × 10 <sup>-9</sup>  | PRKD3     | TRUE  | rs17020490  | rs1702049 | 2:3730479  | C  | T  | 1      |
| 2:105749599  | rs1430802 | NCK2     | C | T     | 0.005 | 1.47 | 1.33-1.63 | 2.1 × 10 <sup>-13</sup> | NCK2      | TRUE  | rs143080277 | rs1430802 | 2:1057495  | C  | T  | 1      |
| 2:202878716  | rs1396433 | WDR12    | T | TC    | 0.131 | 0.94 | 0.92-0.96 | 1.1 × 10 <sup>-8</sup>  | WDR12     | FALSE |             | rs1159535 | chr2:20287 | A  | G  | 1      |
| 3:155069722  | rs1682453 | MME      | A | G     | 0.054 | 0.92 | 0.89-0.95 | 3.6 × 10 <sup>-8</sup>  | MME       | TRUE  | rs16824536  | rs1682453 | 3:1550697  | A  | G  | 1      |
| 3:155084189  | rs6176231 | MME      | G | A     | 0.026 | 1.16 | 1.11-1.21 | 2.2 × 10 <sup>-11</sup> | MME       | TRUE  | rs61762319  | rs6176231 | 3:1550841  | G  | A  | 1      |
| 4:993555     | rs3822030 | IDUA     | G | T     | 0.429 | 0.95 | 0.94-0.96 | 8.3 × 10 <sup>-11</sup> | IDUA      | FALSE |             | NA        | NA         | NA | NA | 0      |
| 4:40197226   | rs2245466 | RHOH     | G | C     | 0.343 | 1.05 | 1.03-1.06 | 1.2 × 10 <sup>-9</sup>  | RHOH      | TRUE  | rs2245466   | rs2245466 | 4:4019722  | G  | C  | 1      |
| 5:14724304   | rs1124033 | ANKH     | A | T     | 0.073 | 1.09 | 1.06-1.12 | 2.3 × 10 <sup>-9</sup>  | ANKH      | TRUE  | rs112403360 | rs1124033 | 5:1472430  | A  | T  | 1      |
| 5:86927378   | rs6237425 | COX7C    | C | T     | 0.23  | 1.07 | 1.05-1.09 | 1.4 × 10 <sup>-15</sup> | COX7C     | FALSE |             | rs2452760 | chr5:86890 | A  | C  | 0.9153 |
| 5:151052827  | rs871269  | TNIP1    | T | C     | 0.326 | 0.96 | 0.95-0.97 | 8.7 × 10 <sup>-9</sup>  | TNIP1     | TRUE  | rs871269    | rs871269  | 5:1510528  | T  | C  | 1      |
| 5:180201150  | rs1137065 | RASGEF1C | A | G     | 0.11  | 1.09 | 1.07-1.12 | 2.2 × 10 <sup>-16</sup> | RASGEF1C  | FALSE |             | rs1163477 | chr5:18019 | A  | G  | 0.9738 |
| 6:114291731  | rs785129  | HS3ST5   | T | C     | 0.35  | 1.04 | 1.03-1.06 | 2.4 × 10 <sup>-9</sup>  | HS3ST5    | TRUE  | rs785129    | rs785129  | 6:1142917  | T  | C  | 1      |
| 7:7817263    | rs6943429 | UMAD1    | T | C     | 0.42  | 1.05 | 1.03-1.06 | 1.0 × 10 <sup>-10</sup> | ICA1_UMA  | TRUE  | rs6943429   | rs6943429 | 7:7817263  | T  | C  | 1      |
| 7:8204382    | rs1095209 | ICA1     | T | C     | 0.114 | 1.07 | 1.05-1.10 | 6.8 × 10 <sup>-9</sup>  | ICA1_UMA  | TRUE  | rs10952097  | rs1095209 | 7:8204382  | T  | C  | 1      |
| 7:12229967   | rs1323751 | TMEM106B | A | C     | 0.411 | 0.96 | 0.94-0.97 | 4.9 × 10 <sup>-11</sup> | TMEM106B  | FALSE |             | rs7804433 | chr7:12227 | A  | G  | 0.9916 |
| 7:28129126   | rs1160871 | JAZF1    | G | GTCTT | 0.222 | 0.95 | 0.93-0.97 | 9.8 × 10 <sup>-9</sup>  | JAZF1     | FALSE |             | rs917116  | chr7:28133 | G  | T  | 0.9915 |
| 7:54873635   | rs7692864 | SEC61G   | T | C     | 0.103 | 0.93 | 0.91-0.95 | 1.6 × 10 <sup>-10</sup> | SEC61G    | TRUE  | rs76928645  | rs7692864 | 7:5487363  | T  | C  | 1      |
| 8:11844613   | rs1065712 | CTSB     | C | G     | 0.053 | 1.09 | 1.06-1.12 | 1.9 × 10 <sup>-9</sup>  | CTSB      | FALSE |             | rs4841602 | chr8:11871 | G  | A  | 0.3952 |
| 8:144103704  | rs3417306 | SHARPIN  | A | G     | 0.081 | 1.13 | 1.09-1.16 | 1.7 × 10 <sup>-16</sup> | SHARPIN   | FALSE |             | rs7983257 | chr8:14404 | C  | T  | 0.651  |
| 9:104903697  | rs1800978 | ABCA1    | G | C     | 0.13  | 1.06 | 1.04-1.08 | 1.6 × 10 <sup>-9</sup>  | ABCA1     | FALSE |             | rs2244278 | chr9:10489 | A  | C  | 0.9268 |
| 10:60025170  | rs7068231 | ANK3     | T | G     | 0.403 | 0.95 | 0.94-0.96 | 3.3 × 10 <sup>-13</sup> | ANK3_CCD  | TRUE  | rs7068231   | rs7068231 | 10:600251  | T  | G  | 1      |
| 10:80494228  | rs6586028 | TSPAN14  | C | T     | 0.196 | 0.93 | 0.91-0.94 | 2.0 × 10 <sup>-15</sup> | TSPAN14   | FALSE |             | rs7910643 | chr10:8049 | G  | A  | 0.9604 |
| 10:96266650  | rs6584063 | BLNK     | G | A     | 0.043 | 0.89 | 0.86-0.92 | 6.7 × 10 <sup>-11</sup> | BLNK      | TRUE  | rs6584063   | rs6584063 | 10:962666  | G  | A  | 1      |
| 10:122413396 | rs7908662 | PLEKHA1  | G | A     | 0.467 | 0.96 | 0.95-0.97 | 2.6 × 10 <sup>-9</sup>  | PLEKHA1   | TRUE  | rs7908662   | rs7908662 | 10:122413  | G  | A  | 1      |
| 12:113281983 | rs6489896 | TPCN1    | C | T     | 0.076 | 1.08 | 1.05-1.10 | 1.8 × 10 <sup>-9</sup>  | TPCN1     | TRUE  | rs6489896   | rs6489896 | 12:113281  | C  | T  | 1      |
| 14:105761758 | rs7157106 | IGH      | A | G     | 0.36  | 1.05 | 1.03-1.07 | 2.0 × 10 <sup>-8</sup>  | IGH       | FALSE |             | rs2871025 | chr14:1057 | T  | C  | 0.9685 |
| 14:106665591 | rs1013128 | IGH      | A | G     | 0.133 | 0.94 | 0.92-0.96 | 4.3 × 10 <sup>-10</sup> | IGH       | TRUE  | rs10131280  | rs1013128 | 14:106665  | A  | G  | 1      |
| 15:64131307  | rs3848143 | SNX1     | G | A     | 0.22  | 1.05 | 1.04-1.07 | 8.4 × 10 <sup>-11</sup> | APH1B_SN  | TRUE  | rs3848143   | rs3848143 | 15:641313  | G  | A  | 1      |
| 15:78936857  | rs1259289 | CTSH     | A | G     | 0.133 | 0.94 | 0.92-0.96 | 4.2 × 10 <sup>-9</sup>  | CTSH      | FALSE |             | rs1214847 | chr15:7893 | C  | T  | 0.8343 |

|             |           |          |   |      |       |      |           |                       |           |       |             |           |            |   |    |        |
|-------------|-----------|----------|---|------|-------|------|-----------|-----------------------|-----------|-------|-------------|-----------|------------|---|----|--------|
| 16:30010081 | rs1140239 | DOC2A    | T | C    | 0.379 | 0.94 | 0.93-0.96 | $2.6 \times 10^{-13}$ | DOC2A     | TRUE  | rs1140239   | rs1140239 | 16:300100  | T | C  | 1      |
| 16:79574511 | rs450674  | MAF      | C | T    | 0.373 | 0.96 | 0.95-0.98 | $3.2 \times 10^{-8}$  | MAF       | FALSE |             | rs375277  | chr16:7957 | C | T  | 0.9266 |
| 16:86420604 | rs1694123 | FOXF1    | A | T    | 0.029 | 1.13 | 1.08-1.17 | $1.3 \times 10^{-8}$  | FOXF1     | TRUE  | rs16941239  | rs1694123 | 16:864206  | A | T  | 1      |
| 16:90103687 | rs5640723 | PRDM7    | A | G    | 0.069 | 1.11 | 1.08-1.14 | $6.5 \times 10^{-15}$ | PRDM7     | TRUE  | rs56407236  | rs5640723 | 16:901036  | A | G  | 1      |
| 17:1728046  | rs3504865 | WDR81    | T | TGAG | 0.214 | 1.06 | 1.04-1.08 | $7.7 \times 10^{-11}$ | WDR81     | FALSE |             | rs9912287 | chr17:1727 | A | G  | 0.8197 |
| 17:18156140 | rs2242595 | MYO15A   | A | G    | 0.112 | 0.94 | 0.92-0.96 | $1.1 \times 10^{-9}$  | MYO15A    | TRUE  | rs2242595   | rs2242595 | 17:181561  | A | G  | 1      |
| 17:44352876 | rs5848    | GRN      | T | C    | 0.289 | 1.07 | 1.06-1.09 | $2.4 \times 10^{-20}$ | GRN       | TRUE  | rs5848      | rs5848    | 17:443528  | T | C  | 1      |
| 19:1854254  | rs1490809 | KLF16    | G | GC   | 0.48  | 1.05 | 1.04-1.07 | $5.1 \times 10^{-10}$ | ABCA7_KLF | TRUE  | rs149080927 | rs1490809 | 19:185425  | G | GC | 1      |
| 19:49950060 | rs9304690 | SIGLEC11 | T | C    | 0.24  | 1.05 | 1.03-1.07 | $4.7 \times 10^{-9}$  | SIGLEC11  | FALSE |             | rs6212630 | chr19:4995 | T | G  | 0.8712 |
| 19:54267597 | rs587709  | LILRB2   | C | T    | 0.325 | 1.05 | 1.04-1.07 | $3.6 \times 10^{-11}$ | LILRB2    | TRUE  | rs587709    | rs587709  | 19:542675  | C | T  | 1      |
| 20:413334   | rs1358782 | RBCK1    | A | G    | 0.246 | 0.95 | 0.94-0.97 | $1.6 \times 10^{-8}$  | RBCK1     | TRUE  | rs1358782   | rs1358782 | 20:413334  | A | G  | 1      |
| 20:63743088 | rs6742    | SLC2A4RG | T | C    | 0.221 | 0.95 | 0.93-0.97 | $2.6 \times 10^{-9}$  | SLC2A4RG  | TRUE  | rs6742      | rs6742    | 20:637430  | T | C  | 1      |
| 21:26101558 | rs2154481 | APP      | C | T    | 0.476 | 0.95 | 0.94-0.97 | $1.0 \times 10^{-11}$ | ADAMTS1   | FALSE |             | rs2830072 | chr21:2612 | T | G  | 0.8688 |

| <b>Table S8 Sample reported and genetic inferring acenstry</b> |                                           |                           |                |
|----------------------------------------------------------------|-------------------------------------------|---------------------------|----------------|
| <b>GrafAnc_genetic_inferring</b>                               | <b>Reported_Race</b>                      | <b>Reported_Ethnicity</b> | <b>Samples</b> |
| AFR                                                            | Black or African American                 |                           | 1              |
| AFR                                                            | Black or African American                 | Hispanic or Latino        | 2              |
| AFR                                                            | Black or African American                 | Not Hispanic or Latino    | 915            |
| AFR                                                            | Other                                     | Hispanic or Latino        | 4              |
| AFR                                                            | Other                                     | Not Hispanic or Latino    | 2              |
| AFR                                                            | White                                     | Not Hispanic or Latino    | 2              |
| African American                                               |                                           |                           | 3              |
| African American                                               | American Indian/Alaska Native             |                           | 1              |
| African American                                               | American Indian/Alaska Native             | Hispanic or Latino        | 2              |
| African American                                               | American Indian/Alaska Native             | Not Hispanic or Latino    | 3              |
| African American                                               | Asian                                     | Not Hispanic or Latino    | 2              |
| African American                                               | Black or African American                 |                           | 130            |
| African American                                               | Black or African American                 | Hispanic or Latino        | 87             |
| African American                                               | Black or African American                 | Not Hispanic or Latino    | 5072           |
| African American                                               |                                           | Hispanic or Latino        | 2              |
| African American                                               |                                           | Not Hispanic or Latino    | 4              |
| African American                                               | Other                                     |                           | 2              |
| African American                                               | Other                                     | Hispanic or Latino        | 161            |
| African American                                               | Other                                     | Not Hispanic or Latino    | 2              |
| African American                                               | White                                     |                           | 8              |
| African American                                               | White                                     | Hispanic or Latino        | 13             |
| African American                                               | White                                     | Not Hispanic or Latino    | 46             |
| East Asian                                                     |                                           |                           | 1              |
| East Asian                                                     | American Indian/Alaska Native             | Not Hispanic or Latino    | 1              |
| East Asian                                                     | Asian                                     |                           | 15             |
| East Asian                                                     | Asian                                     | Hispanic or Latino        | 4              |
| East Asian                                                     | Asian                                     | Not Hispanic or Latino    | 2543           |
| East Asian                                                     | Black or African American                 | Hispanic or Latino        | 1              |
| East Asian                                                     | Black or African American                 | Not Hispanic or Latino    | 1              |
| East Asian                                                     | Native Hawaiian or Other Pacific Islander | Not Hispanic or Latino    | 2              |
| East Asian                                                     |                                           | Not Hispanic or Latino    | 4              |
| East Asian                                                     | Other                                     | Hispanic or Latino        | 4              |
| East Asian                                                     | Other                                     | Not Hispanic or Latino    | 4              |
| East Asian                                                     | White                                     |                           | 25             |
| East Asian                                                     | White                                     | Hispanic or Latino        | 4              |
| East Asian                                                     | White                                     | Not Hispanic or Latino    | 11             |
| South Asian                                                    | Asian                                     |                           | 3              |
| South Asian                                                    | Asian                                     | Not Hispanic or Latino    | 2625           |
| South Asian                                                    | Black or African American                 | Not Hispanic or Latino    | 2              |
| South Asian                                                    | Native Hawaiian or Other Pacific Islander | Not Hispanic or Latino    | 1              |
| South Asian                                                    | Other                                     |                           | 2              |
| South Asian                                                    | Other                                     | Not Hispanic or Latino    | 7              |
| South Asian                                                    | White                                     |                           | 15             |
| South Asian                                                    | White                                     | Not Hispanic or Latino    | 5              |
| European                                                       |                                           |                           | 38             |

|                  |                                           |                        |       |
|------------------|-------------------------------------------|------------------------|-------|
| European         | American Indian/Alaska Native             |                        | 5     |
| European         | American Indian/Alaska Native             | Not Hispanic or Latino | 29    |
| European         | Asian                                     |                        | 1     |
| European         | Asian                                     | Not Hispanic or Latino | 7     |
| European         | Black or African American                 |                        | 1     |
| European         | Black or African American                 | Hispanic or Latino     | 17    |
| European         | Black or African American                 | Not Hispanic or Latino | 24    |
| European         |                                           | Hispanic or Latino     | 13    |
| European         | Native Hawaiian or Other Pacific Islander | Not Hispanic or Latino | 3     |
| European         |                                           | Not Hispanic or Latino | 24    |
| European         | Other                                     |                        | 32    |
| European         | Other                                     | Hispanic or Latino     | 73    |
| European         | Other                                     | Not Hispanic or Latino | 25    |
| European         | White                                     |                        | 3558  |
| European         | White                                     | Hispanic or Latino     | 467   |
| European         | White                                     | Not Hispanic or Latino | 21725 |
| Latin American 1 |                                           |                        | 2     |
| Latin American 1 | American Indian/Alaska Native             | Hispanic or Latino     | 12    |
| Latin American 1 | American Indian/Alaska Native             | Not Hispanic or Latino | 3     |
| Latin American 1 | Asian                                     | Hispanic or Latino     | 5     |
| Latin American 1 | Asian                                     | Not Hispanic or Latino | 1     |
| Latin American 1 | Black or African American                 |                        | 5     |
| Latin American 1 | Black or African American                 | Hispanic or Latino     | 335   |
| Latin American 1 | Black or African American                 | Not Hispanic or Latino | 181   |
| Latin American 1 |                                           | Hispanic or Latino     | 29    |
| Latin American 1 | Native Hawaiian or Other Pacific Islander | Hispanic or Latino     | 5     |
| Latin American 1 | Other                                     |                        | 4     |
| Latin American 1 | Other                                     | Hispanic or Latino     | 5194  |
| Latin American 1 | Other                                     | Not Hispanic or Latino | 6     |
| Latin American 1 | White                                     |                        | 9     |
| Latin American 1 | White                                     | Hispanic or Latino     | 1282  |
| Latin American 1 | White                                     | Not Hispanic or Latino | 29    |
| Latin American 2 |                                           |                        | 3     |
| Latin American 2 | American Indian/Alaska Native             |                        | 1     |
| Latin American 2 | American Indian/Alaska Native             | Hispanic or Latino     | 38    |
| Latin American 2 | American Indian/Alaska Native             | Not Hispanic or Latino | 33    |
| Latin American 2 | Asian                                     | Hispanic or Latino     | 42    |
| Latin American 2 | Black or African American                 | Hispanic or Latino     | 9     |
| Latin American 2 | Black or African American                 | Not Hispanic or Latino | 2     |
| Latin American 2 |                                           | Hispanic or Latino     | 1893  |
| Latin American 2 | Other                                     |                        | 5     |
| Latin American 2 | Other                                     | Hispanic or Latino     | 407   |
| Latin American 2 | Other                                     | Not Hispanic or Latino | 2     |
| Latin American 2 | White                                     |                        | 25    |
| Latin American 2 | White                                     | Hispanic or Latino     | 1917  |
| Latin American 2 | White                                     | Not Hispanic or Latino | 30    |
| MEN              | Asian                                     | Not Hispanic or Latino | 2     |

|                 |                               |                        |     |
|-----------------|-------------------------------|------------------------|-----|
| MEN             | Black or African American     | Not Hispanic or Latino | 4   |
| MEN             |                               | Not Hispanic or Latino | 1   |
| MEN             | Other                         | Hispanic or Latino     | 9   |
| MEN             | Other                         | Not Hispanic or Latino | 5   |
| MEN             | White                         |                        | 16  |
| MEN             | White                         | Hispanic or Latino     | 9   |
| MEN             | White                         | Not Hispanic or Latino | 55  |
| Multi-ancestry  | American Indian/Alaska Native | Not Hispanic or Latino | 1   |
| Multi-ancestry  | Asian                         | Not Hispanic or Latino | 3   |
| Multi-ancestry  | Black or African American     | Hispanic or Latino     | 5   |
| Multi-ancestry  | Black or African American     | Not Hispanic or Latino | 12  |
| Multi-ancestry  |                               | Hispanic or Latino     | 71  |
| Multi-ancestry  |                               | Not Hispanic or Latino | 1   |
| Multi-ancestry  | Other                         | Hispanic or Latino     | 75  |
| Multi-ancestry  | Other                         | Not Hispanic or Latino | 3   |
| Multi-ancestry  | White                         |                        | 4   |
| Multi-ancestry  | White                         | Hispanic or Latino     | 41  |
| Multi-ancestry  | White                         | Not Hispanic or Latino | 16  |
| Native American | American Indian/Alaska Native | Hispanic or Latino     | 1   |
| Native American | American Indian/Alaska Native | Not Hispanic or Latino | 5   |
| Native American | Asian                         | Hispanic or Latino     | 1   |
| Native American |                               | Hispanic or Latino     | 627 |
| Native American | Other                         | Hispanic or Latino     | 212 |
| Native American | White                         |                        | 1   |
| Native American | White                         | Hispanic or Latino     | 14  |
